# Supplementary material for: The Effect of Using an Inappropriate Protein Database for Proteomic Data Analysis
Source: PLoS One. 2011 Jun 14;6(6):e20873. doi: 10.1371/journal.pone.0020873 (PMC3114852; doi:10.1371/journal.pone.0020873)
Supplement: Supporting Information S1 — Protein prospector search results for ECBC_02 (Proteins and Peptides identified in Tables S1 and S2, respectively), ECBC_3 (Proteins and Peptides identified in Tables S3 and S4, respectively), and ECBC_4 (Proteins and Peptides identified in Tables S5 and S6, respectively). (XLS) [file pone.0020873.s001.xls]

## Sheet: Table 1
Rank	Uniq Pep	Acc #	Num Unique	% Cov	Best Disc Score	Best Expect Val	Protein MW	Species	Protein Name
[1]		58585098	69	65.5	6.5	2e-11	48886.5	APIS MELLIFERA	major royal jelly protein 1
[1-1]	13	284182838	14	37.7	4.1	8.4e-07	53015	APIS MELLIFERA	major royal jelly protein 4
[1-2, 33-1]	2	110761428	3	8.4	3.32	4.6e-07	33707.4	APIS MELLIFERA	PREDICTED: similar to yellow-h CG1629-PA
[2]		155369750	32	42.1	6.28	4.7e-10	112189	APIS MELLIFERA	hexamerin 110
[3]		66513649	41	23.2	4.92	3.5e-08	278414	APIS MELLIFERA	PREDICTED: similar to Spectrin alpha chain
[4]		58585146	26	51.8	7.57	1e-12	40008.7	APIS MELLIFERA	arginine kinase
[5]		58585104	33	24	4.2	6e-08	201050	APIS MELLIFERA	vitellogenin
[6]		66547450	18	39.3	6.97	3.6e-11	60413	APIS MELLIFERA	PREDICTED: similar to 60 kDa heat shock protein, mitochondrial precursor (Hsp60) (60 kDa chaperonin) (CPN60) (Heat shock protein 60) (HSP-60) (Mitochondrial matrix protein P1)
[7]		149939403	18	26.9	6.43	2.6e-10	81487.7	APIS MELLIFERA	hexamerin
[8]		1168320	21	41.5	5.75	6.2e-11	41803.2	BACDO	RecName: Full=Actin-2, muscle-specific
[9]		66545506	15	37.2	5.22	2.7e-09	47174.5	APIS MELLIFERA	PREDICTED: similar to Calreticulin CG9429-PA isoform 1
[10]		66534655	13	54.1	5.24	3.2e-08	17700.3	APIS MELLIFERA	PREDICTED: similar to Glutathione S transferase S1 CG8938-PA, isoform A, partial
[11]		12585365	12	28	4.79	2.2e-08	50230.9	MANSE	RecName: Full=Tubulin beta-1 chain; AltName: Full=Beta-1-tubulin
[12]		66557932	10	14.8	5.47	8.5e-09	97330	APIS MELLIFERA	PREDICTED: similar to Glycogen phosphorylase isoform 2
[13]		110776421	11	35.1	5.07	4.6e-09	39670.1	APIS MELLIFERA	PREDICTED: similar to yellow-e2 CG17044-PA
[14]		58585254	8	49.7	6.31	1e-09	17171.3	APIS MELLIFERA	troponin C type IIIb
[15]		58585154	11	44.3	4.81	1.4e-09	7584.9	APIS MELLIFERA	melittin precursor
[16]		66508940	8	28.5	6.1	1.1e-09	29906.9	APIS MELLIFERA	PREDICTED: similar to CG6459-PA
[17]		110758758	18	8.7	3.19	1.2e-06	374763	APIS MELLIFERA	PREDICTED: similar to Retinoid- and fatty-acid binding protein CG11064-PA isoform 1
[18]		110748949	10	24.7	4.43	2.7e-08	39600.6	APIS MELLIFERA	PREDICTED: similar to Aldolase CG6058-PF, isoform F
[19]		126002169	9	18.4	5.07	3.3e-08	54348.8	DROSOPHILA PSEUDOOBSCURA PSEUDOOBSCURA	ATPsyn-beta
[20]		229892248	8	13.7	5.07	1e-08	83384.3	APIS MELLIFERA	heat shock protein 90
[21]		110763974	12	39.9	4.04	8e-08	49162.4	APIS MELLIFERA	PREDICTED: similar to CG31075-PA isoform 1
[22]		7688	8	78.4	5.08	9.5e-09	16679.5	DROSOPHILA MELANOGASTER	unnamed protein product
[23]		66548684	10	25.7	4.92	1.4e-09	55815.1	APIS MELLIFERA	PREDICTED: similar to Pyruvate kinase CG7070-PB, isoform B
[24]		110749675	9	39.6	4.75	2.6e-08	32982.3	APIS MELLIFERA	PREDICTED: similar to Tropomyosin 1 CG4898-PD, isoform D
[25]		66521738	7	18.6	5.78	9.8e-10	51930.5	APIS MELLIFERA	PREDICTED: similar to lethal (1) G0030 CG3861-PA, isoform A
[26]		125981509	8	15.1	4.49	2.9e-08	72306.5	DROSOPHILA PSEUDOOBSCURA PSEUDOOBSCURA	GA17988
[27]		94158718	6	48.9	5.6	1.6e-09	15203.8	APIS MELLIFERA	odorant binding protein 21
[28]		48097086	8	36.8	4.34	4.8e-08	28076.7	APIS MELLIFERA	PREDICTED: similar to 14-3-3-like protein (Leonardo protein) (14-3-3 zeta) isoform 1
[29]		48142692	6	31.2	5.13	4.1e-09	35883.5	APIS MELLIFERA	PREDICTED: similar to Glyceraldehyde-3-phosphate dehydrogenase 2 (Glyceraldehyde-3-phosphate dehydrogenase II) (GAPDH II) isoform 1
[30]		110755329	8	22.2	5	4e-09	52003.4	APIS MELLIFERA	PREDICTED: hypothetical protein
[31]		110763826	6	17.6	5.5	4.6e-10	44992.3	APIS MELLIFERA	PREDICTED: similar to Phosphoglycerate kinase isoform 1
[32]		110765081	10	24.6	3.33	1.2e-06	44573.9	APIS MELLIFERA	PREDICTED: similar to lethal (1) G0334 CG7010-PC, isoform C isoform 1
[33]		62198227	6	17.2	3.99	4.6e-07	50541.4	APIS MELLIFERA	major royal jelly protein 7
[1-2, 33-1]	2	110761428	3	8.4	3.32	4.6e-07	33707.4	APIS MELLIFERA	PREDICTED: similar to yellow-h CG1629-PA
[34]		110759783	7	4.6	4.23	6.1e-08	268739	APIS MELLIFERA	PREDICTED: similar to Spectrin beta chain
[35]		66530257	5	10.4	4.92	1.4e-08	67253.8	APIS MELLIFERA	PREDICTED: similar to Lamin CG6944-PA, partial
[36]		66508906	5	22.4	4.86	1.1e-08	27140.7	APIS MELLIFERA	PREDICTED: similar to CG10527-PA
[37]		48096138	6	22.9	3.73	3e-07	37972.7	APIS MELLIFERA	PREDICTED: similar to Sorbitol dehydrogenase-2 CG4649-PA
[38]		58585106	6	55.4	4.43	1.4e-08	14954.6	APIS MELLIFERA	chemosensory protein 3 precursor
[39]		283436152	6	33.6	3.64	2.3e-06	25133.9	APIS MELLIFERA	peroxiredoxin-like protein
[40]		66530423	6	12.4	4.74	4.7e-09	55686	APIS MELLIFERA	PREDICTED: similar to Aldehyde dehydrogenase CG3752-PA isoform 1
[41]		66505007	4	5.8	5.89	1.4e-09	91204.3	APIS MELLIFERA	PREDICTED: similar to Hsc70Cb CG6603-PA, isoform A isoform 1
[42]		66522386	6	30.6	3.83	1.6e-07	32157.3	APIS MELLIFERA	PREDICTED: similar to Tropomyosin 2 CG4843-PB, isoform B
[43]		66550890	5	18.3	4.16	5.1e-08	35361.1	APIS MELLIFERA	PREDICTED: similar to Phosphoglyceromutase CG1721-PA, isoform A
[44]		66510528	7	63.6	2.98	4.5e-06	17170.2	APIS MELLIFERA	PREDICTED: similar to Fkbp13 CG9847-PA, isoform A, partial
[45]		109115260	6	16.7	3.25	1.4e-06	62101.3	MACACA MULATTA	PREDICTED: keratin, type I cytoskeletal 10-like isoform 2
[46]		110748686	4	48.9	4.18	8.7e-08	15777.1	APIS MELLIFERA	PREDICTED: hypothetical protein
[47]		5114221	4	48.6	3.91	1.7e-07	12024.4	APIS MELLIFERA	FABP-like protein
[48]		112983481	3	11.6	5.34	2.6e-09	49905.9	BOMBYX MORI	tubulin alpha chain
[49]		94158729	3	30.9	5.09	2.2e-08	17663.4	APIS MELLIFERA	odorant binding protein 3
[50]		94158830	3	31.1	5.59	1.3e-08	15000.5	APIS MELLIFERA	odorant binding protein 18
[51]		66553147	3	38.1	4.48	1.2e-07	13811.8	APIS MELLIFERA	PREDICTED: similar to Vacuolar ATP synthase subunit G (V-ATPase G subunit) (Vacuolar proton pump G subunit) (V-ATPase 13 kDa subunit)
[52]		58585076	4	10.2	4.08	1.7e-08	63898.6	APIS MELLIFERA	juvenile hormone esterase
[53]		5627	4	34	4.04	4.7e-08	18487.1	APIS MELLIFERA	phospholipase A-2
[54]		66560571	3	22.9	4.55	4e-09	13090.9	APIS MELLIFERA	PREDICTED: similar to CG31715-PA
[55]		110756547	4	1.8	3.76	2.4e-07	318248	APIS MELLIFERA	PREDICTED: similar to CG33519-PB isoform 1
[56]		297591983	4	46.8	3.38	3.6e-06	11623.2	APIS MELLIFERA	60S acidic ribosomal protein P1
[57]		147902613	3	20.6	4	1.7e-07	13802.8	APIS MELLIFERA	profilin
[58]		110757651	3	14.1	3.94	8.7e-09	25565.7	APIS MELLIFERA	PREDICTED: similar to CG14207-PB, isoform B isoform 1
[59]		110766006	4	6.2	3.27	3.5e-06	65226.1	APIS MELLIFERA	PREDICTED: hypothetical protein
[60]		74096071	2	5.1	5.06	7.7e-09	59956.3	CIONA INTESTINALIS	ATP synthase alpha-subunit
[61]		94158711	2	21.5	4.62	8.8e-09	15031.6	APIS MELLIFERA	odorant binding protein 17
[62]		15608450	2	8.6	5.07	3.3e-08	53094.6	MYCOBACTERIUM TUBERCULOSIS H37RV	F0F1 ATP synthase subunit beta
[63]		156540073	3	8.7	3.82	1.1e-07	132416	NASONIA VITRIPENNIS	PREDICTED: similar to pyruvate carboxylase
[64]		66531851	3	11.9	3.6	1.1e-07	30048.7	APIS MELLIFERA	PREDICTED: similar to Protein disulfide-isomerase precursor (PDI), partial
[65]		94158709	2	10.4	3.94	8e-07	15204.6	APIS MELLIFERA	odorant binding protein 16
[66]		110769113	2	5.3	4.36	5.8e-07	48252.3	APIS MELLIFERA	PREDICTED: similar to CG4409-PA, partial
[67]		110759540	2	7.9	4.32	3.5e-07	29666.9	APIS MELLIFERA	PREDICTED: similar to Probable elongation factor 1-delta (EF-1-delta)
[68]		110763879	2	9.5	3.67	4e-08	26983	APIS MELLIFERA	PREDICTED: hypothetical protein
[69]		66517317	2	24.8	3.68	2.5e-07	17618.1	APIS MELLIFERA	PREDICTED: similar to lethal (1) G0230 CG2968-PA
[70]		48094573	2	19.3	3.9	8.7e-08	19433.8	APIS MELLIFERA	PREDICTED: hypothetical protein
[71]		66515350	3	2.8	3.17	7.6e-07	261462	APIS MELLIFERA	PREDICTED: similar to CG3523-PA
[72]		66558818	2	32	3.83	4.4e-07	16540.3	APIS MELLIFERA	PREDICTED: similar to Myosin-2 essential light chain (Myosin II essential light chain) (Nonmuscle myosin essential light chain) isoform 1
[73]		78101798	2	5.2	3.85	1.6e-07	48206.2	APIS MELLIFERA	TPA: TPA_exp: troponin T isoform 2
[74]		66531434	3	8.9	2.69	2.2e-06	55144.5	APIS MELLIFERA	PREDICTED: similar to Vacuolar H+-ATPase 55kD B subunit CG17369-PB, isoform B
[75]		283436154	2	6	3.46	3.4e-07	41263.9	APIS MELLIFERA	glutamine synthetase
[76]		110750676	2	15.4	3.04	5e-06	15182.7	APIS MELLIFERA	PREDICTED: similar to CG12330-PA
[77]		158298445	2	2.9	3.33	5.7e-07	101438	ANOPHELES GAMBIAE STR. PEST	AGAP009591-PA
[78]		217795253	2	14.4	2.59	3e-06	35666.3	PORTUNUS TRITUBERCULATUS	glyceraldehyde-3-phosphate dehydrogenase
[79]		110762068	1	12.5	3.59	2.7e-07	15292.1	APIS MELLIFERA	PREDICTED: hypothetical protein
[80]		114051866	1	3.2	3.54	1.2e-06	46176.5	BOMBYX MORI	isocitrate dehydrogenase
[81]		94158731	1	22.2	2.64	2.1e-05	15625.2	APIS MELLIFERA	odorant binding protein 19
[82]		66566395	1	10.9	2.57	1.2e-06	13972	APIS MELLIFERA	PREDICTED: similar to ciboulot CG4944-PB, isoform B
[83]		[-1168320]	3	15.4	0.81	0.0064	41803.2	BACDO	RecName: Full=Actin-2, muscle-specific
[84]		[-66513649]	4	3.3	0.53	0.0096	278414	APIS MELLIFERA	PREDICTED: similar to Spectrin alpha chain
[85]		[-66505007]	1	1.6	0.3	0.0098	91204.3	APIS MELLIFERA	PREDICTED: similar to Hsc70Cb CG6603-PA, isoform A isoform 1

## Sheet: Table 2
	Uniq Peptide	Acc #	Num Unique	% Cov	Best Disc Score	Best Expect Val	M+H	m/z	z	m/z Calc	Da	Peptide	RT	Expect	Protein MW	Species	Protein Name
[1]		58585098	69	65.5	6.5	2e-11	1753.43	877.22	2	876.929	0.29	TVAQSDETLQMIASMK	57.071	2e-11	48886.5	APIS MELLIFERA	major royal jelly protein 1
[1]		58585098	69	65.5	6.5	2e-11	1770.17	885.59	2	884.926	0.66	TVAQSDETLQM(Oxidation)IASMK	53.055	3.1e-11	48886.5	APIS MELLIFERA	major royal jelly protein 1
[1]		58585098	69	65.5	6.5	2e-11	1770.27	885.64	2	884.926	0.71	TVAQSDETLQMIASM(Oxidation)K	51.204	3.8e-10	48886.5	APIS MELLIFERA	major royal jelly protein 1
[1]		58585098	69	65.5	6.5	2e-11	2076.57	1038.79	2	1038.03	0.76	KVGDGGPLLQPYPDWSFAK	59.435	6.2e-10	48886.5	APIS MELLIFERA	major royal jelly protein 1
[1]		58585098	69	65.5	6.5	2e-11	1763.19	882.1	2	881.878	0.22	M(Oxidation)VNNDFNFDDVNFR	56.535	1.3e-09	48886.5	APIS MELLIFERA	major royal jelly protein 1
[1]		58585098	69	65.5	6.5	2e-11	1846.25	923.63	2	923.429	0.2	GEGLIVYHNSDDSFHR	45.785	3.4e-09	48886.5	APIS MELLIFERA	major royal jelly protein 1
[1]		58585098	69	65.5	6.5	2e-11	1948.45	974.73	2	973.986	0.74	VGDGGPLLQPYPDWSFAK	63.335	4e-09	48886.5	APIS MELLIFERA	major royal jelly protein 1
[1]		58585098	69	65.5	6.5	2e-11	2854.93	1427.97	2	1427.66	0.31	TSDYQQNDIHYEGVQNILDTQSSAK	53.442	4.7e-09	48886.5	APIS MELLIFERA	major royal jelly protein 1
[1]		58585098	69	65.5	6.5	2e-11	1748.23	874.62	2	873.881	0.74	MVNNDFNFDDVNFR	87.285	1.1e-08	48886.5	APIS MELLIFERA	major royal jelly protein 1
[1]		58585098	69	65.5	6.5	2e-11	1849.41	925.21	2	924.452	0.76	GDGGPLLQPYPDWSFAK	61.552	1.5e-08	48886.5	APIS MELLIFERA	major royal jelly protein 1
[1]		58585098	69	65.5	6.5	2e-11	1615.45	808.23	2	807.935	0.29	IMNANVNELILNTR	62.202	1.7e-08	48886.5	APIS MELLIFERA	major royal jelly protein 1
[1]		58585098	69	65.5	6.5	2e-11	1403.19	702.1	2	701.805	0.3	NDFNFDDVNFR	55.918	2.9e-08	48886.5	APIS MELLIFERA	major royal jelly protein 1
[1]		58585098	69	65.5	6.5	2e-11	1398.19	699.6	2	699.286	0.31	FFDYDFGSDER	54.516	3.4e-08	48886.5	APIS MELLIFERA	major royal jelly protein 1
[1]		58585098	69	65.5	6.5	2e-11	1792.31	896.66	2	895.941	0.72	DGGPLLQPYPDWSFAK	61.876	4.7e-08	48886.5	APIS MELLIFERA	major royal jelly protein 1
[1]		58585098	69	65.5	6.5	2e-11	1517.15	759.08	2	758.826	0.25	NNDFNFDDVNFR	55.708	5.2e-08	48886.5	APIS MELLIFERA	major royal jelly protein 1
[1]		58585098	69	65.5	6.5	2e-11	1785.29	893.15	2	892.924	0.23	TVAQSDETLQM(Oxidation)IASM(Oxidation)K	48.794	5.9e-08	48886.5	APIS MELLIFERA	major royal jelly protein 1
[1]		58585098	69	65.5	6.5	2e-11	1494.45	747.73	2	746.935	0.8	LLTFDLTTSQLLK	93.104	7.5e-08	48886.5	APIS MELLIFERA	major royal jelly protein 1
[1]		58585098	69	65.5	6.5	2e-11	1275.15	638.08	2	637.301	0.78	DAILSGEYDYK	47.744	1.6e-07	48886.5	APIS MELLIFERA	major royal jelly protein 1
[1]		58585098	69	65.5	6.5	2e-11	1378.33	689.67	2	689.372	0.3	YNGVPSSLNVISK	49.516	2.1e-07	48886.5	APIS MELLIFERA	major royal jelly protein 1
[1]		58585098	69	65.5	6.5	2e-11	1507.29	754.15	2	753.42	0.73	YNGVPSSLNVISKK	47.301	2.2e-07	48886.5	APIS MELLIFERA	major royal jelly protein 1
[1]		58585098	69	65.5	6.5	2e-11	1558.33	779.67	2	779.381	0.29	RQDAILSGEYDYK	48.289	5.7e-07	48886.5	APIS MELLIFERA	major royal jelly protein 1
[1]		58585098	69	65.5	6.5	2e-11	1979.43	990.22	2	989.981	0.24	VGDGGPLLQPYPDW(Dioxidation)SFAK	59.945	6.3e-07	48886.5	APIS MELLIFERA	major royal jelly protein 1
[1]		58585098	69	65.5	6.5	2e-11	1354.15	677.58	2	677.323	0.26	SDETLQMIASMK	54.53	6.6e-07	48886.5	APIS MELLIFERA	major royal jelly protein 1
[1]		58585098	69	65.5	6.5	2e-11	1631.45	816.23	2	815.933	0.3	IM(Oxidation)NANVNELILNTR	52.56	9.5e-07	48886.5	APIS MELLIFERA	major royal jelly protein 1
[1]		58585098	69	65.5	6.5	2e-11	1370.69	685.85	2	685.873	-0.023	NANVNELILNTR	49.664	9.6e-07	48886.5	APIS MELLIFERA	major royal jelly protein 1
[1]		58585098	69	65.5	6.5	2e-11	3173.18	794.05	4	793.367	0.68	RQDAILSGEYDYKNNYPSDIDQWHDK	53.428	9.6e-07	48886.5	APIS MELLIFERA	major royal jelly protein 1
[1]		58585098	69	65.5	6.5	2e-11	1632.21	816.61	2	816.358	0.25	NNYPSDIDQWHDK	44.827	1.1e-06	48886.5	APIS MELLIFERA	major royal jelly protein 1
[1]		58585098	69	65.5	6.5	2e-11	1188.07	594.54	2	594.264	0.28	TSNTFDYDPK	18.36	1.8e-06	48886.5	APIS MELLIFERA	major royal jelly protein 1
[1]		58585098	69	65.5	6.5	2e-11	1502.29	751.65	2	751.393	0.26	MNANVNELILNTR	53.232	2.5e-06	48886.5	APIS MELLIFERA	major royal jelly protein 1
[1]		58585098	69	65.5	6.5	2e-11	1401.45	701.23	2	701.33	-0.1	QDAILSGEYDYK	47.228	2.5e-06	48886.5	APIS MELLIFERA	major royal jelly protein 1
[1]		58585098	69	65.5	6.5	2e-11	1300.79	650.9	2	650.806	0.094	LTSNTFDYDPK	44.044	2.5e-06	48886.5	APIS MELLIFERA	major royal jelly protein 1
[1]		58585098	69	65.5	6.5	2e-11	1103.35	552.18	2	552.217	-0.037	DYDFGSDER	19.018	4.1e-06	48886.5	APIS MELLIFERA	major royal jelly protein 1
[1]		58585098	69	65.5	6.5	2e-11	1123.11	562.06	2	561.819	0.24	SLPILHEWK	50.053	4.2e-06	48886.5	APIS MELLIFERA	major royal jelly protein 1
[1]		58585098	69	65.5	6.5	2e-11	1267.53	634.27	2	633.851	0.42	TFDLTTSQLLK	59.179	4.3e-06	48886.5	APIS MELLIFERA	major royal jelly protein 1
[1]		58585098	69	65.5	6.5	2e-11	1404.07	702.54	2	702.315	0.23	YPSDIDQWHDK	42.525	5.7e-06	48886.5	APIS MELLIFERA	major royal jelly protein 1
[1]		58585098	69	65.5	6.5	2e-11	1518.01	759.51	2	759.336	0.17	NYPSDIDQWHDK	43.992	6.1e-06	48886.5	APIS MELLIFERA	major royal jelly protein 1
[1]		58585098	69	65.5	6.5	2e-11	1333.07	667.04	2	666.833	0.21	LYYVNTEQFR	49.615	6.2e-06	48886.5	APIS MELLIFERA	major royal jelly protein 1
[1]		58585098	69	65.5	6.5	2e-11	1289.25	645.13	2	644.783	0.35	DFNFDDVNFR	57.548	1.4e-05	48886.5	APIS MELLIFERA	major royal jelly protein 1
[1]		58585098	69	65.5	6.5	2e-11	1902.99	952	2	951.981	0.019	IHYEGVQNILDTQSSAK	53.973	1.7e-05	48886.5	APIS MELLIFERA	major royal jelly protein 1
[1]		58585098	69	65.5	6.5	2e-11	1664.25	832.63	2	832.353	0.28	NNYPSDIDQW(Dioxidation)HDK	42.287	1.9e-05	48886.5	APIS MELLIFERA	major royal jelly protein 1
[1]		58585098	69	65.5	6.5	2e-11	1294.25	647.63	2	647.351	0.28	EALPHVPIFDR	53.883	5.7e-05	48886.5	APIS MELLIFERA	major royal jelly protein 1
[1]		58585098	69	65.5	6.5	2e-11	1535.51	768.26	2	767.941	0.32	IKEALPHVPIFDR	52.534	7.3e-05	48886.5	APIS MELLIFERA	major royal jelly protein 1
[1]		58585098	69	65.5	6.5	2e-11	1877.13	939.07	2	938.467	0.6	KVGDGGPLLQPYPDWSF	65.019	7.5e-05	48886.5	APIS MELLIFERA	major royal jelly protein 1
[1]		58585098	69	65.5	6.5	2e-11	1166.39	583.7	2	583.327	0.37	FDLTTSQLLK	55.091	7.9e-05	48886.5	APIS MELLIFERA	major royal jelly protein 1
[1]		58585098	69	65.5	6.5	2e-11	3228.77	1614.89	2	1614.28	0.61	VNNDFNFDDVNFRIM(Oxidation)NANVNELILNTR	56.344	0.00011	48886.5	APIS MELLIFERA	major royal jelly protein 1
[1]		58585098	69	65.5	6.5	2e-11	1185.75	593.38	2	593.333	0.047	NVNELILNTR	47.946	0.00014	48886.5	APIS MELLIFERA	major royal jelly protein 1
[1]		58585098	69	65.5	6.5	2e-11	1699.59	567.2	3	566.651	0.55	IKEALPHVPIFDRY	55.808	0.00014	48886.5	APIS MELLIFERA	major royal jelly protein 1
[1]		58585098	69	65.5	6.5	2e-11	2493.3	831.77	3	831.406	0.36	NNYPSDIDQWHDKIFVTMLR	62.138	0.00015	48886.5	APIS MELLIFERA	major royal jelly protein 1
[1]		58585098	69	65.5	6.5	2e-11	1380.35	690.68	2	690.393	0.29	LTFDLTTSQLLK	61.193	0.00016	48886.5	APIS MELLIFERA	major royal jelly protein 1
[1]		58585098	69	65.5	6.5	2e-11	2389.56	797.19	3	796.719	0.47	QQNDIHYEGVQNILDTQSSAK	51.965	0.00029	48886.5	APIS MELLIFERA	major royal jelly protein 1
[1]		58585098	69	65.5	6.5	2e-11	1464.57	732.79	2	732.88	-0.09	LLQPYPDWSFAK	58.38	0.0003	48886.5	APIS MELLIFERA	major royal jelly protein 1
[1]		58585098	69	65.5	6.5	2e-11	3015.7	754.68	4	754.341	0.34	QDAILSGEYDYKNNYPSDIDQWHDK	54.565	0.00048	48886.5	APIS MELLIFERA	major royal jelly protein 1
[1]		58585098	69	65.5	6.5	2e-11	1244.67	622.84	2	622.777	0.063	YDDCSGIVSASK	46.637	0.00049	48886.5	APIS MELLIFERA	major royal jelly protein 1
[1]		58585098	69	65.5	6.5	2e-11	1534.37	767.69	2	767.423	0.27	RYNGVPSSLNVISK	47.547	0.00069	48886.5	APIS MELLIFERA	major royal jelly protein 1
[1]		58585098	69	65.5	6.5	2e-11	1554.23	777.62	2	777.336	0.28	FFDYDFGSDERR	50.665	0.0011	48886.5	APIS MELLIFERA	major royal jelly protein 1
[1]		58585098	69	65.5	6.5	2e-11	2219.58	555.65	4	555.259	0.39	DEKGEGLIVYHNSDDSFHR	45.473	0.0013	48886.5	APIS MELLIFERA	major royal jelly protein 1
[1]		58585098	69	65.5	6.5	2e-11	1215.65	608.33	2	607.841	0.49	NGVPSSLNVISK	49.482	0.0013	48886.5	APIS MELLIFERA	major royal jelly protein 1
[1]		58585098	69	65.5	6.5	2e-11	1219.47	610.24	2	610.291	-0.051	YYVNTEQFR	45.637	0.0013	48886.5	APIS MELLIFERA	major royal jelly protein 1
[1]		58585098	69	65.5	6.5	2e-11	2404.02	601.76	4	601.29	0.47	IADEKGEGLIVYHNSDDSFHR	46.971	0.0014	48886.5	APIS MELLIFERA	major royal jelly protein 1
[1]		58585098	69	65.5	6.5	2e-11	2499.85	1250.43	2	1251.09	-0.66	SLPILHEWKFFDYDFGSDER	47.486	0.002	48886.5	APIS MELLIFERA	major royal jelly protein 1
[1]		58585098	69	65.5	6.5	2e-11	2106.81	702.94	3	703.021	-0.081	KVGDGGPLLQPYPDW(Dioxidation)SFAK	57.426	0.0028	48886.5	APIS MELLIFERA	major royal jelly protein 1
[1]		58585098	69	65.5	6.5	2e-11	1662.99	555	3	554.649	0.35	RYNGVPSSLNVISKK	44.701	0.004	48886.5	APIS MELLIFERA	major royal jelly protein 1
[1]		58585098	69	65.5	6.5	2e-11	1489.87	745.44	2	745.345	0.095	IVYHNSDDSFHR	17.227	0.0041	48886.5	APIS MELLIFERA	major royal jelly protein 1
[1]		58585098	69	65.5	6.5	2e-11	1407.09	704.05	2	703.802	0.25	FDYDFGSDERR	45.106	0.0064	48886.5	APIS MELLIFERA	major royal jelly protein 1
[1]		58585098	69	65.5	6.5	2e-11	2296.83	766.28	3	766.032	0.25	SGVLFFGLVGDSALGCW(Dioxidation)NEHR	71.533	0.015	48886.5	APIS MELLIFERA	major royal jelly protein 1
[1]		58585098	69	65.5	6.5	2e-11	1115.51	558.26	2	557.737	0.52	HNSDDSFHR	10.826	0.017	48886.5	APIS MELLIFERA	major royal jelly protein 1
[1]		58585098	69	65.5	6.5	2e-11	1259.73	630.37	2	630.268	0.1	DYDFGSDERR	17.677	0.017	48886.5	APIS MELLIFERA	major royal jelly protein 1
[1]		58585098	69	65.5	6.5	2e-11	2510.78	628.45	4	627.805	0.65	NNYPSDIDQWHDKIFVTM(Oxidation)LR	58.075	0.028	48886.5	APIS MELLIFERA	major royal jelly protein 1
[1]		58585098	69	65.5	6.5	2e-11	2794.17	932.06	3	932.164	-0.1	M(Met-loss)TRLFMLVCLGIVCQGTTGNILRGESL	86.81	0.05	48886.5	APIS MELLIFERA	major royal jelly protein 1
[1-1]	13	284182838	14	37.7	4.1	8.4e-07	1249.77	625.39	2	625.343	0.047	AFDLNTSQLLK	56.241	8.4e-07	53015	APIS MELLIFERA	major royal jelly protein 4
[1-1]	13	284182838	14	37.7	4.1	8.4e-07	1807.39	904.2	2	903.942	0.26	NTLIIYQNADDSFHR	50.87	9.8e-07	53015	APIS MELLIFERA	major royal jelly protein 4
[1-1]	13	284182838	14	37.7	4.1	8.4e-07	1478.51	739.76	2	739.878	-0.12	YNGVPSSLNVVSDK	48.82	1.4e-06	53015	APIS MELLIFERA	major royal jelly protein 4
[1-1]	13	284182838	14	37.7	4.1	8.4e-07	1395.15	698.08	2	697.836	0.24	NEDTLQMVVSMK	55.118	2.1e-06	53015	APIS MELLIFERA	major royal jelly protein 4
[1-1]	13	284182838	14	37.7	4.1	8.4e-07	1394.55	697.78	2	697.867	-0.087	QVEIPHDVATTGK	20.28	6.1e-06	53015	APIS MELLIFERA	major royal jelly protein 4
[1-1]	13	284182838	14	37.7	4.1	8.4e-07	1509.43	755.22	2	755.419	-0.2	LFAFDLNTSQLLK	66.295	9.1e-06	53015	APIS MELLIFERA	major royal jelly protein 4
[1-1]	13	284182838	14	37.7	4.1	8.4e-07	1194.37	597.69	2	597.312	0.38	NEYLLALSDR	51.876	1.1e-05	53015	APIS MELLIFERA	major royal jelly protein 4
[1-1]	13	284182838	14	37.7	4.1	8.4e-07	3204.63	1068.88	3	1068.56	0.32	NQNVLNNDLNLEHVNFQILGANVNDLIR	71.799	7.7e-05	53015	APIS MELLIFERA	major royal jelly protein 4
[1-1]	13	284182838	14	37.7	4.1	8.4e-07	1464.57	732.79	2	732.88	-0.09	LLQPYPDWSFAK	58.38	0.0003	53015	APIS MELLIFERA	major royal jelly protein 4
[1-1]	13	284182838	14	37.7	4.1	8.4e-07	1290.23	645.62	2	644.821	0.8	VYGMALSPVTHN	48.276	0.00076	53015	APIS MELLIFERA	major royal jelly protein 4
[1-1]	13	284182838	14	37.7	4.1	8.4e-07	1379.37	690.19	2	689.864	0.33	VQDVFDSQLTVK	55.104	0.0018	53015	APIS MELLIFERA	major royal jelly protein 4
[1-1]	13	284182838	14	37.7	4.1	8.4e-07	1237.85	619.43	2	619.294	0.14	QAAIQSGEYDR	17.1	0.0026	53015	APIS MELLIFERA	major royal jelly protein 4
[1-1]	13	284182838	14	37.7	4.1	8.4e-07	1621.13	811.07	2	810.85	0.22	YLDYDFDNDERR	46.363	0.0043	53015	APIS MELLIFERA	major royal jelly protein 4
[1-1]	13	284182838	14	37.7	4.1	8.4e-07	1306.51	653.76	2	653.327	0.43	MSNQQENLTLK	18.906	0.033	53015	APIS MELLIFERA	major royal jelly protein 4
[1-2, 33-1]	2	110761428	3	8.4	3.32	4.6e-07	1508.23	754.62	2	754.386	0.23	YDGVPSSLNVISEK	52.263	4.6e-07	33707.4	APIS MELLIFERA	PREDICTED: similar to yellow-h CG1629-PA
[1-2, 33-1]	2	110761428	3	8.4	3.32	4.6e-07	1188.07	594.54	2	594.264	0.28	TSNTFDYDPK	18.36	1.8e-06	33707.4	APIS MELLIFERA	PREDICTED: similar to yellow-h CG1629-PA
[1-2, 33-1]	2	110761428	3	8.4	3.32	4.6e-07	1300.79	650.9	2	650.806	0.094	LTSNTFDYDPK	44.044	2.5e-06	33707.4	APIS MELLIFERA	PREDICTED: similar to yellow-h CG1629-PA
[2]		155369750	32	42.1	6.28	4.7e-10	1755.37	878.19	2	877.973	0.22	VIQEAQNIAIQNTQGK	45.657	4.7e-10	112189	APIS MELLIFERA	hexamerin 110
[2]		155369750	32	42.1	6.28	4.7e-10	2213.51	1107.26	2	1106.52	0.74	NSQQAPGQSPDWPSTSQIQR	47.697	3.4e-09	112189	APIS MELLIFERA	hexamerin 110
[2]		155369750	32	42.1	6.28	4.7e-10	1946.35	973.68	2	973.477	0.2	YLQQQAGQQDQQANIGR	17.938	4.1e-09	112189	APIS MELLIFERA	hexamerin 110
[2]		155369750	32	42.1	6.28	4.7e-10	1576.31	788.66	2	788.434	0.23	IAVHSEQNVPGAVVR	40.874	1.1e-08	112189	APIS MELLIFERA	hexamerin 110
[2]		155369750	32	42.1	6.28	4.7e-10	1623.29	812.15	2	811.382	0.77	GQGVQGMNVPYGMQR	48.052	3.7e-08	112189	APIS MELLIFERA	hexamerin 110
[2]		155369750	32	42.1	6.28	4.7e-10	1639.19	820.1	2	819.38	0.72	GQGVQGMNVPYGM(Oxidation)QR	44.994	1e-07	112189	APIS MELLIFERA	hexamerin 110
[2]		155369750	32	42.1	6.28	4.7e-10	1800.39	900.7	2	899.959	0.74	QPQGMNILGDLIEGTGR	66.484	2.3e-07	112189	APIS MELLIFERA	hexamerin 110
[2]		155369750	32	42.1	6.28	4.7e-10	4106.67	1369.56	3	1369.35	0.21	LLGNAPEVENIWDYTPSSLELGEVAVHDPVFYQLYK	75.833	3.8e-07	112189	APIS MELLIFERA	hexamerin 110
[2]		155369750	32	42.1	6.28	4.7e-10	2227.14	743.05	3	742.729	0.32	GLNGLEFAGRPQNLQLQSQR	53.319	5.2e-07	112189	APIS MELLIFERA	hexamerin 110
[2]		155369750	32	42.1	6.28	4.7e-10	2851.08	951.03	3	950.495	0.54	NQHLFVELDQFIQNLHAGENTIIR	73.316	5.9e-07	112189	APIS MELLIFERA	hexamerin 110
[2]		155369750	32	42.1	6.28	4.7e-10	4059.03	1353.68	3	1353.37	0.31	LRDAIDSGNVITPQGVFLSLYQPQGMNILGDLIEGTGR	81.48	1.1e-06	112189	APIS MELLIFERA	hexamerin 110
[2]		155369750	32	42.1	6.28	4.7e-10	2870.62	718.41	4	718.126	0.28	LSNGLGPIKDIDYENVQSLYQPHLR	60.177	1.7e-06	112189	APIS MELLIFERA	hexamerin 110
[2]		155369750	32	42.1	6.28	4.7e-10	1638.31	819.66	2	819.38	0.28	GQGVQGM(Oxidation)NVPYGMQR	40.746	2.5e-06	112189	APIS MELLIFERA	hexamerin 110
[2]		155369750	32	42.1	6.28	4.7e-10	3074.91	1025.64	3	1025.17	0.47	ISQPIPNQELQNLGASYDIESNSHQYK	57.11	4.7e-06	112189	APIS MELLIFERA	hexamerin 110
[2]		155369750	32	42.1	6.28	4.7e-10	1813.35	907.18	2	906.45	0.73	DVLVFHQGQPTNDITQ	52.028	5.8e-06	112189	APIS MELLIFERA	hexamerin 110
[2]		155369750	32	42.1	6.28	4.7e-10	1170.79	585.9	2	585.817	0.083	VHVNEGQFLK	38.324	8.3e-06	112189	APIS MELLIFERA	hexamerin 110
[2]		155369750	32	42.1	6.28	4.7e-10	1417.77	709.39	2	708.854	0.54	QAAMAAVQQSQQR	17.288	3.2e-05	112189	APIS MELLIFERA	hexamerin 110
[2]		155369750	32	42.1	6.28	4.7e-10	2706.35	1353.68	2	1353.7	-0.02	QGVFLSLYQPQGMNILGDLIEGTGR	81.48	4e-05	112189	APIS MELLIFERA	hexamerin 110
[2]		155369750	32	42.1	6.28	4.7e-10	3659.88	1220.63	3	1219.97	0.66	EQGQISQVGGGIQQNVEVLPENLVNAQQQVQAVR	63.426	4.3e-05	112189	APIS MELLIFERA	hexamerin 110
[2]		155369750	32	42.1	6.28	4.7e-10	2182.53	728.18	3	727.734	0.45	AADQDLLNKQQDVIQLLQK	59.36	5e-05	112189	APIS MELLIFERA	hexamerin 110
[2]		155369750	32	42.1	6.28	4.7e-10	3801.1	951.03	4	950.506	0.52	Q(Gln->pyro-Glu)GRPISISKNQHLFVELDQFIQNLHAGENTIIR	73.316	5e-05	112189	APIS MELLIFERA	hexamerin 110
[2]		155369750	32	42.1	6.28	4.7e-10	1348.33	674.67	2	674.344	0.33	RLDHQPYQYK	16.817	5.4e-05	112189	APIS MELLIFERA	hexamerin 110
[2]		155369750	32	42.1	6.28	4.7e-10	1420.41	710.71	2	710.396	0.31	NQLIQYVATLEK	58.822	5.9e-05	112189	APIS MELLIFERA	hexamerin 110
[2]		155369750	32	42.1	6.28	4.7e-10	2295.42	765.81	3	765.38	0.43	SQEPFYITEPHQIFSFPAR	62.431	0.00013	112189	APIS MELLIFERA	hexamerin 110
[2]		155369750	32	42.1	6.28	4.7e-10	1192.13	596.57	2	596.293	0.28	LDHQPYQYK	17.028	0.00042	112189	APIS MELLIFERA	hexamerin 110
[2]		155369750	32	42.1	6.28	4.7e-10	1436.27	718.64	2	718.842	-0.2	GVQGMNVPYGMQR	47.622	0.00092	112189	APIS MELLIFERA	hexamerin 110
[2]		155369750	32	42.1	6.28	4.7e-10	1675.23	559.08	3	558.642	0.44	GAQYLYLHQQLLAR	52.09	0.0012	112189	APIS MELLIFERA	hexamerin 110
[2]		155369750	32	42.1	6.28	4.7e-10	1375.61	688.31	2	687.865	0.44	HDHQGRPISISK	8.279	0.0013	112189	APIS MELLIFERA	hexamerin 110
[2]		155369750	32	42.1	6.28	4.7e-10	1455.35	728.18	2	727.92	0.26	NKQQDVIQLLQK	59.36	0.0022	112189	APIS MELLIFERA	hexamerin 110
[2]		155369750	32	42.1	6.28	4.7e-10	1346.33	673.67	2	672.898	0.77	SLGALSVPNIFVK	62.82	0.0039	112189	APIS MELLIFERA	hexamerin 110
[2]		155369750	32	42.1	6.28	4.7e-10	1707.27	569.76	3	569.295	0.47	YITEPHQIFSFPAR	54.729	0.0093	112189	APIS MELLIFERA	hexamerin 110
[2]		155369750	32	42.1	6.28	4.7e-10	2040.39	680.8	3	680.376	0.42	DQDLLNKQQDVIQLLQK	59.373	0.014	112189	APIS MELLIFERA	hexamerin 110
[3]		66513649	41	23.2	4.92	3.5e-08	1311.17	656.09	2	655.815	0.28	ADSFDATTLAGNK	44.358	3.5e-08	278414	APIS MELLIFERA	PREDICTED: similar to Spectrin alpha chain
[3]		66513649	41	23.2	4.92	3.5e-08	1460.51	730.76	2	730.417	0.34	LLDSLQVQQLFR	63.009	7.7e-08	278414	APIS MELLIFERA	PREDICTED: similar to Spectrin alpha chain
[3]		66513649	41	23.2	4.92	3.5e-08	2377.49	1189.25	2	1189.09	0.16	QEAFLANEDLGDSLDSVEALIK	71.943	1.4e-07	278414	APIS MELLIFERA	PREDICTED: similar to Spectrin alpha chain
[3]		66513649	41	23.2	4.92	3.5e-08	1476.51	738.76	2	738.863	-0.1	LQEASQQQQFNR	17.275	4e-07	278414	APIS MELLIFERA	PREDICTED: similar to Spectrin alpha chain
[3]		66513649	41	23.2	4.92	3.5e-08	1330.21	665.61	2	665.354	0.26	IQTQIQDLNEK	41.136	7.8e-07	278414	APIS MELLIFERA	PREDICTED: similar to Spectrin alpha chain
[3]		66513649	41	23.2	4.92	3.5e-08	1310.21	655.61	2	655.334	0.28	ANQLGSAHEVQR	16.586	1e-06	278414	APIS MELLIFERA	PREDICTED: similar to Spectrin alpha chain
[3]		66513649	41	23.2	4.92	3.5e-08	1500.13	750.57	2	750.353	0.22	HQNFEQELNANR	18.728	2.4e-06	278414	APIS MELLIFERA	PREDICTED: similar to Spectrin alpha chain
[3]		66513649	41	23.2	4.92	3.5e-08	1418.31	709.66	2	709.386	0.27	KGDTLTLLNSNNK	34.844	2.7e-06	278414	APIS MELLIFERA	PREDICTED: similar to Spectrin alpha chain
[3]		66513649	41	23.2	4.92	3.5e-08	1265.63	633.32	2	633.277	0.043	DTEQADAWMAK	40.274	5.6e-06	278414	APIS MELLIFERA	PREDICTED: similar to Spectrin alpha chain
[3]		66513649	41	23.2	4.92	3.5e-08	2248.8	750.27	3	750.035	0.23	TRTDEIMSLWESLTHATEK	69.447	7e-06	278414	APIS MELLIFERA	PREDICTED: similar to Spectrin alpha chain
[3]		66513649	41	23.2	4.92	3.5e-08	1687.19	844.1	2	843.908	0.19	LIEGEHYAADDVAQR	19.864	9.8e-06	278414	APIS MELLIFERA	PREDICTED: similar to Spectrin alpha chain
[3]		66513649	41	23.2	4.92	3.5e-08	1147.15	574.08	2	573.312	0.77	DLTSVQNLQK	42.312	3.1e-05	278414	APIS MELLIFERA	PREDICTED: similar to Spectrin alpha chain
[3]		66513649	41	23.2	4.92	3.5e-08	1276.71	638.86	2	638.812	0.048	DVDETKDWIR	44.45	3.7e-05	278414	APIS MELLIFERA	PREDICTED: similar to Spectrin alpha chain
[3]		66513649	41	23.2	4.92	3.5e-08	1356.15	678.58	2	678.344	0.24	ILENPEDIQER	44.525	9.2e-05	278414	APIS MELLIFERA	PREDICTED: similar to Spectrin alpha chain
[3]		66513649	41	23.2	4.92	3.5e-08	1127.95	564.48	2	564.325	0.16	DLIGVQNLQK	48.263	0.00018	278414	APIS MELLIFERA	PREDICTED: similar to Spectrin alpha chain
[3]		66513649	41	23.2	4.92	3.5e-08	1306.31	653.66	2	653.343	0.32	WTSLQTLTAER	51.021	0.00024	278414	APIS MELLIFERA	PREDICTED: similar to Spectrin alpha chain
[3]		66513649	41	23.2	4.92	3.5e-08	2015.94	672.65	3	672.025	0.63	HEALVSDLEAFASTIAALR	77.797	0.00028	278414	APIS MELLIFERA	PREDICTED: similar to Spectrin alpha chain
[3]		66513649	41	23.2	4.92	3.5e-08	1305.33	653.17	2	652.843	0.33	YAALQQPMNIR	47.5	0.00029	278414	APIS MELLIFERA	PREDICTED: similar to Spectrin alpha chain
[3]		66513649	41	23.2	4.92	3.5e-08	3797.91	1266.64	3	1266.29	0.35	TVEDIELWLSEVEGQLMSEDYGKDLTSVQNLQK	80.404	0.00051	278414	APIS MELLIFERA	PREDICTED: similar to Spectrin alpha chain
[3]		66513649	41	23.2	4.92	3.5e-08	2923.26	731.57	4	731.124	0.45	HALLEADVASHSDRIESIAQAADQFVK	61.355	0.00054	278414	APIS MELLIFERA	PREDICTED: similar to Spectrin alpha chain
[3]		66513649	41	23.2	4.92	3.5e-08	1186.09	593.55	2	593.335	0.22	LLNQAWAELK	53.849	0.00055	278414	APIS MELLIFERA	PREDICTED: similar to Spectrin alpha chain
[3]		66513649	41	23.2	4.92	3.5e-08	2752.42	688.86	4	688.622	0.24	IATLQTLADQLIAAEHYAAKPIDER	71.286	0.00059	278414	APIS MELLIFERA	PREDICTED: similar to Spectrin alpha chain
[3]		66513649	41	23.2	4.92	3.5e-08	1788.51	596.84	3	596.303	0.54	EKDAALNNDDLGKDLR	42.754	0.00087	278414	APIS MELLIFERA	PREDICTED: similar to Spectrin alpha chain
[3]		66513649	41	23.2	4.92	3.5e-08	1277.09	639.05	2	638.296	0.75	DIEDEEAWIR	52.29	0.0014	278414	APIS MELLIFERA	PREDICTED: similar to Spectrin alpha chain
[3]		66513649	41	23.2	4.92	3.5e-08	2143.05	715.02	3	714.723	0.3	KHEALVSDLEAFASTIAALR	74.96	0.0014	278414	APIS MELLIFERA	PREDICTED: similar to Spectrin alpha chain
[3]		66513649	41	23.2	4.92	3.5e-08	1340.35	670.68	2	670.886	-0.21	GRDLIGVQNLQK	43.697	0.0018	278414	APIS MELLIFERA	PREDICTED: similar to Spectrin alpha chain
[3]		66513649	41	23.2	4.92	3.5e-08	1317.45	659.23	2	658.838	0.39	QQETPTVDITGK	27.541	0.0018	278414	APIS MELLIFERA	PREDICTED: similar to Spectrin alpha chain
[3]		66513649	41	23.2	4.92	3.5e-08	1575.25	788.13	2	788.424	-0.29	AVQLM(Oxidation)SLGQTEAALK	73.598	0.0022	278414	APIS MELLIFERA	PREDICTED: similar to Spectrin alpha chain
[3]		66513649	41	23.2	4.92	3.5e-08	1201.69	601.35	2	601.312	0.038	EKEPVAASTNR	15.037	0.0031	278414	APIS MELLIFERA	PREDICTED: similar to Spectrin alpha chain
[3]		66513649	41	23.2	4.92	3.5e-08	1132.23	566.62	2	566.306	0.31	EAAELATWIK	52.769	0.0034	278414	APIS MELLIFERA	PREDICTED: similar to Spectrin alpha chain
[3]		66513649	41	23.2	4.92	3.5e-08	1195.37	598.19	2	598.291	-0.1	LDESYYLHR	41.389	0.0036	278414	APIS MELLIFERA	PREDICTED: similar to Spectrin alpha chain
[3]		66513649	41	23.2	4.92	3.5e-08	1677.09	559.7	3	558.945	0.76	HQLVEADIQAHEER	42.452	0.0043	278414	APIS MELLIFERA	PREDICTED: similar to Spectrin alpha chain
[3]		66513649	41	23.2	4.92	3.5e-08	1210.17	605.59	2	605.291	0.3	DVVLSSDDFGR	47.844	0.0047	278414	APIS MELLIFERA	PREDICTED: similar to Spectrin alpha chain
[3]		66513649	41	23.2	4.92	3.5e-08	1719.24	573.75	3	573.297	0.45	QKEINEEWTQLTAK	49.03	0.006	278414	APIS MELLIFERA	PREDICTED: similar to Spectrin alpha chain
[3]		66513649	41	23.2	4.92	3.5e-08	1556.19	778.6	2	778.404	0.2	LDESLTYQQFLAK	55.721	0.0089	278414	APIS MELLIFERA	PREDICTED: similar to Spectrin alpha chain
[3]		66513649	41	23.2	4.92	3.5e-08	2670.62	668.41	4	667.818	0.59	DKENHAQVQDVGEDLEQVEVMQK	54.292	0.0091	278414	APIS MELLIFERA	PREDICTED: similar to Spectrin alpha chain
[3]		66513649	41	23.2	4.92	3.5e-08	1784.67	595.56	3	595.296	0.26	HQAFEAELAANADRIQ	12.849	0.011	278414	APIS MELLIFERA	PREDICTED: similar to Spectrin alpha chain
[3]		66513649	41	23.2	4.92	3.5e-08	2438.98	610.5	4	611.065	-0.56	RVEPEAGLSASQQNLAREQSSIA	42.376	0.027	278414	APIS MELLIFERA	PREDICTED: similar to Spectrin alpha chain
[3]		66513649	41	23.2	4.92	3.5e-08	2351.94	784.65	3	784.39	0.26	RPIVMNADYGKDEDSSEALLK	49.278	0.034	278414	APIS MELLIFERA	PREDICTED: similar to Spectrin alpha chain
[3]		66513649	41	23.2	4.92	3.5e-08	1321.21	661.11	2	660.84	0.27	YAALQQPM(Oxidation)NIR	41.702	0.041	278414	APIS MELLIFERA	PREDICTED: similar to Spectrin alpha chain
[3]		66513649	41	23.2	4.92	3.5e-08	2533.7	634.18	4	633.811	0.37	IQARNQSGVSEDALKEFSMM(Oxidation)FK	110.095	0.046	278414	APIS MELLIFERA	PREDICTED: similar to Spectrin alpha chain
[4]		58585146	26	51.8	7.57	1e-12	2382.53	1191.77	2	1191.07	0.7	DFGDVDSLGNLDPANEFIVSTR	66.701	1e-12	40008.7	APIS MELLIFERA	arginine kinase
[4]		58585146	26	51.8	7.57	1e-12	2198.53	1099.77	2	1099.54	0.23	TLFADLFDPIIEDYHGGFK	75.253	2.4e-11	40008.7	APIS MELLIFERA	arginine kinase
[4]		58585146	26	51.8	7.57	1e-12	1720.35	860.68	2	860.395	0.29	GEHTEAEGGIYDISNK	20.097	9.7e-11	40008.7	APIS MELLIFERA	arginine kinase
[4]		58585146	26	51.8	7.57	1e-12	1693.35	847.18	2	846.446	0.73	M(Met-loss+Acetyl)VDQAVLDKLETGFSK	69.353	3.3e-08	40008.7	APIS MELLIFERA	arginine kinase
[4]		58585146	26	51.8	7.57	1e-12	1669.29	835.15	2	834.416	0.73	IISMQMGGDLGQVYR	56.048	4.4e-08	40008.7	APIS MELLIFERA	arginine kinase
[4]		58585146	26	51.8	7.57	1e-12	1684.31	842.66	2	842.413	0.25	IISM(Oxidation)QMGGDLGQVYR	50.856	5.6e-08	40008.7	APIS MELLIFERA	arginine kinase
[4]		58585146	26	51.8	7.57	1e-12	1822.63	911.82	2	911.966	-0.15	Acetyl-MVDQAVLDKLETGFSK	67.22	6.2e-07	40008.7	APIS MELLIFERA	arginine kinase
[4]		58585146	26	51.8	7.57	1e-12	1356.23	678.62	2	678.364	0.26	YLSKDVFDQLK	51.143	8e-07	40008.7	APIS MELLIFERA	arginine kinase
[4]		58585146	26	51.8	7.57	1e-12	1320.21	660.61	2	660.356	0.25	VSSTLSGLEGELK	52.647	1.7e-06	40008.7	APIS MELLIFERA	arginine kinase
[4]		58585146	26	51.8	7.57	1e-12	1201.69	601.35	2	601.3	0.05	GTFYPLTGMSK	50.83	1.1e-05	40008.7	APIS MELLIFERA	arginine kinase
[4]		58585146	26	51.8	7.57	1e-12	1122.31	561.66	2	561.314	0.35	LGLTEYQAVK	46.188	1.1e-05	40008.7	APIS MELLIFERA	arginine kinase
[4]		58585146	26	51.8	7.57	1e-12	1255.51	628.26	2	628.321	-0.061	EMHDGIAELIK	48.867	5.1e-05	40008.7	APIS MELLIFERA	arginine kinase
[4]		58585146	26	51.8	7.57	1e-12	1147.77	574.39	2	574.311	0.079	LIDDHFLFK	53.353	8.8e-05	40008.7	APIS MELLIFERA	arginine kinase
[4]		58585146	26	51.8	7.57	1e-12	1978.41	660.14	3	659.649	0.49	TRGEHTEAEGGIYDISNK	18.156	0.00013	40008.7	APIS MELLIFERA	arginine kinase
[4]		58585146	26	51.8	7.57	1e-12	1986.15	662.72	3	661.988	0.73	FADLFDPIIEDYHGGFK	66.406	0.00013	40008.7	APIS MELLIFERA	arginine kinase
[4]		58585146	26	51.8	7.57	1e-12	1805.57	903.29	2	902.988	0.3	M(Met-loss+Acetyl)VDQAVLDKLETGFSKL	73.346	0.00015	40008.7	APIS MELLIFERA	arginine kinase
[4]		58585146	26	51.8	7.57	1e-12	1152.31	576.66	2	576.325	0.34	LVHAVNEIEK	17.697	0.00016	40008.7	APIS MELLIFERA	arginine kinase
[4]		58585146	26	51.8	7.57	1e-12	1308.05	654.53	2	654.375	0.15	LVHAVNEIEKR	17.427	0.00023	40008.7	APIS MELLIFERA	arginine kinase
[4]		58585146	26	51.8	7.57	1e-12	2034.24	678.75	3	678.656	0.094	GTRGEHTEAEGGIYDISNK	18.169	0.00037	40008.7	APIS MELLIFERA	arginine kinase
[4]		58585146	26	51.8	7.57	1e-12	2730.62	683.41	4	682.87	0.54	LGLTEYQAVKEMHDGIAELIKLEK	70.602	0.001	40008.7	APIS MELLIFERA	arginine kinase
[4]		58585146	26	51.8	7.57	1e-12	1983.06	661.69	3	661.326	0.36	EM(Oxidation)EEKVSSTLSGLEGELK	52.832	0.0015	40008.7	APIS MELLIFERA	arginine kinase
[4]		58585146	26	51.8	7.57	1e-12	1278.47	639.74	2	639.364	0.38	RLGLTEYQAVK	42.899	0.0023	40008.7	APIS MELLIFERA	arginine kinase
[4]		58585146	26	51.8	7.57	1e-12	3186.46	797.37	4	796.894	0.48	TDKHPPKDFGDVDSLGNLDPANEFIVSTR	60.043	0.0051	40008.7	APIS MELLIFERA	arginine kinase
[4]		58585146	26	51.8	7.57	1e-12	2842.3	711.33	4	710.852	0.48	HPPKDFGDVDSLGNLDPANEFIVSTR	61.436	0.012	40008.7	APIS MELLIFERA	arginine kinase
[4]		58585146	26	51.8	7.57	1e-12	1838.34	613.45	3	612.965	0.49	ADLFDPIIEDYHGGFK	61.889	0.013	40008.7	APIS MELLIFERA	arginine kinase
[4]		58585146	26	51.8	7.57	1e-12	1272.29	636.65	2	636.319	0.33	EM(Oxidation)HDGIAELIK	46.543	0.036	40008.7	APIS MELLIFERA	arginine kinase
[5]		58585104	33	24	4.2	6e-08	1410.53	705.77	2	705.854	-0.084	AQTFDGKDYPLR	42.059	6e-08	201050	APIS MELLIFERA	vitellogenin
[5]		58585104	33	24	4.2	6e-08	1836.35	918.68	2	918.462	0.22	FVPGTTSQPEVFVNGEK	49.753	2.5e-07	201050	APIS MELLIFERA	vitellogenin
[5]		58585104	33	24	4.2	6e-08	1525.69	763.35	2	763.393	-0.043	VEENEIIFEIYK	59.549	8.2e-07	201050	APIS MELLIFERA	vitellogenin
[5]		58585104	33	24	4.2	6e-08	1223.47	612.24	2	611.827	0.41	SFFELLQNPK	58.745	1.1e-06	201050	APIS MELLIFERA	vitellogenin
[5]		58585104	33	24	4.2	6e-08	1483.31	742.16	2	741.847	0.31	IYNNPFSDVEER	51.068	1.4e-06	201050	APIS MELLIFERA	vitellogenin
[5]		58585104	33	24	4.2	6e-08	1395.35	698.18	2	697.882	0.3	ILSVFEPYLEGK	60.965	3.4e-06	201050	APIS MELLIFERA	vitellogenin
[5]		58585104	33	24	4.2	6e-08	1638.27	819.64	2	819.372	0.27	TNEEMWELIDTEK	57.63	4.3e-06	201050	APIS MELLIFERA	vitellogenin
[5]		58585104	33	24	4.2	6e-08	1896.31	948.66	2	948.455	0.21	VNSVQVPTDDEPYASFK	51.993	7.7e-06	201050	APIS MELLIFERA	vitellogenin
[5]		58585104	33	24	4.2	6e-08	1386.13	693.57	2	693.333	0.24	SIHNNYPVHTFG	38.014	1.8e-05	201050	APIS MELLIFERA	vitellogenin
[5]		58585104	33	24	4.2	6e-08	2114.43	705.48	3	705.008	0.47	SVNHLLTHHEYDYELSR	46.2	3.1e-05	201050	APIS MELLIFERA	vitellogenin
[5]		58585104	33	24	4.2	6e-08	1777.15	889.08	2	888.915	0.17	VMTRPDTDSENWTPK	43.746	4.5e-05	201050	APIS MELLIFERA	vitellogenin
[5]		58585104	33	24	4.2	6e-08	1343.55	672.28	2	671.83	0.45	DPVIFSTSFDSK	52.44	7.4e-05	201050	APIS MELLIFERA	vitellogenin
[5]		58585104	33	24	4.2	6e-08	1370.53	685.77	2	685.893	-0.12	DLPISGKPFQIR	52.427	0.00011	201050	APIS MELLIFERA	vitellogenin
[5]		58585104	33	24	4.2	6e-08	1176.81	588.91	2	588.312	0.6	IM(Oxidation)ALGMIGEPK	49.423	0.00012	201050	APIS MELLIFERA	vitellogenin
[5]		58585104	33	24	4.2	6e-08	2067.66	689.89	3	689.733	0.16	HILDKLPTLISNYIEAVK	70.114	0.00015	201050	APIS MELLIFERA	vitellogenin
[5]		58585104	33	24	4.2	6e-08	1422.27	711.64	2	711.33	0.31	LPYPWTMDNER	53.808	0.00016	201050	APIS MELLIFERA	vitellogenin
[5]		58585104	33	24	4.2	6e-08	2022.29	1011.65	2	1011.55	0.099	IVPEELVPLEGNLMINNK	64.051	0.00049	201050	APIS MELLIFERA	vitellogenin
[5]		58585104	33	24	4.2	6e-08	2084.37	695.46	3	695.028	0.43	FIGLTSDKFDVSLALDGER	81.608	0.0005	201050	APIS MELLIFERA	vitellogenin
[5]		58585104	33	24	4.2	6e-08	2958.22	740.31	4	739.644	0.67	LFHYSVVPFVSNHDILNLRPLSMEK	65.791	0.00056	201050	APIS MELLIFERA	vitellogenin
[5]		58585104	33	24	4.2	6e-08	1314.23	657.62	2	657.359	0.26	DVPTWEVNILK	58.849	0.00078	201050	APIS MELLIFERA	vitellogenin
[5]		58585104	33	24	4.2	6e-08	1461.29	731.15	2	730.922	0.23	LPTLISNYIEAVK	63.816	0.00099	201050	APIS MELLIFERA	vitellogenin
[5]		58585104	33	24	4.2	6e-08	1173.39	587.2	2	586.759	0.44	TDDEPYASFK	37.58	0.0013	201050	APIS MELLIFERA	vitellogenin
[5]		58585104	33	24	4.2	6e-08	2696.49	899.5	3	898.804	0.7	ELIFQIANELEDASNIPVHATLEK	73.95	0.0013	201050	APIS MELLIFERA	vitellogenin
[5]		58585104	33	24	4.2	6e-08	1206.87	603.94	2	603.773	0.17	NNPFSDVEER	44.714	0.0015	201050	APIS MELLIFERA	vitellogenin
[5]		58585104	33	24	4.2	6e-08	1867.59	623.2	3	622.668	0.53	VSNHDILNLRPLSMEK	52.708	0.0017	201050	APIS MELLIFERA	vitellogenin
[5]		58585104	33	24	4.2	6e-08	2453.97	818.66	3	819.432	-0.77	TW(Dioxidation)TVFRDAITQTGTGPAFLTIK	55.974	0.0018	201050	APIS MELLIFERA	vitellogenin
[5]		58585104	33	24	4.2	6e-08	1908.03	636.68	3	636.309	0.37	LTDRLPYPWTMDNER	55.648	0.003	201050	APIS MELLIFERA	vitellogenin
[5]		58585104	33	24	4.2	6e-08	1826.46	609.49	3	609.321	0.17	GTRPMIPDDNTSLALPK	51.411	0.0051	201050	APIS MELLIFERA	vitellogenin
[5]		58585104	33	24	4.2	6e-08	1613.27	807.14	2	806.493	0.65	SPRLKELVGATSIIK	77.369	0.019	201050	APIS MELLIFERA	vitellogenin
[5]		58585104	33	24	4.2	6e-08	1911.48	637.83	3	637.676	0.15	HFISGIDSNLHVYAPLK	54.681	0.022	201050	APIS MELLIFERA	vitellogenin
[5]		58585104	33	24	4.2	6e-08	1158.37	579.69	2	579.29	0.4	GDGRHM(Oxidation)EVIK	41.661	0.023	201050	APIS MELLIFERA	vitellogenin
[5]		58585104	33	24	4.2	6e-08	1211.59	606.3	2	606.339	-0.039	SPELVPMPTLK	54.428	0.024	201050	APIS MELLIFERA	vitellogenin
[5]		58585104	33	24	4.2	6e-08	1884.42	628.81	3	628.354	0.46	TLTSLGDLSDVHTGILIK	60.085	0.025	201050	APIS MELLIFERA	vitellogenin
[6]		66547450	18	39.3	6.97	3.6e-11	2413.69	1207.35	2	1206.67	0.68	TALTDAAGVASLLTTAEAVVAELPK	86.396	3.6e-11	60413	APIS MELLIFERA	PREDICTED: similar to 60 kDa heat shock protein, mitochondrial precursor (Hsp60) (60 kDa chaperonin) (CPN60) (Heat shock protein 60) (HSP-60) (Mitochondrial matrix protein P1)
[6]		66547450	18	39.3	6.97	3.6e-11	2360.55	1180.78	2	1180.53	0.25	VSDGNLGYDALNDEYVDMIEK	61.692	9.5e-11	60413	APIS MELLIFERA	PREDICTED: similar to 60 kDa heat shock protein, mitochondrial precursor (Hsp60) (60 kDa chaperonin) (CPN60) (Heat shock protein 60) (HSP-60) (Mitochondrial matrix protein P1)
[6]		66547450	18	39.3	6.97	3.6e-11	1540.39	770.7	2	769.909	0.79	VEFQDALLLFSEK	67.335	6.5e-10	60413	APIS MELLIFERA	PREDICTED: similar to 60 kDa heat shock protein, mitochondrial precursor (Hsp60) (60 kDa chaperonin) (CPN60) (Heat shock protein 60) (HSP-60) (Mitochondrial matrix protein P1)
[6]		66547450	18	39.3	6.97	3.6e-11	1513.63	757.32	2	757.382	-0.062	TLHDELEVIEGMK	57.412	6.6e-09	60413	APIS MELLIFERA	PREDICTED: similar to 60 kDa heat shock protein, mitochondrial precursor (Hsp60) (60 kDa chaperonin) (CPN60) (Heat shock protein 60) (HSP-60) (Mitochondrial matrix protein P1)
[6]		66547450	18	39.3	6.97	3.6e-11	1798.23	899.62	2	899.493	0.13	LQGVDILADAVAVTMGPK	71.118	5.2e-08	60413	APIS MELLIFERA	PREDICTED: similar to 60 kDa heat shock protein, mitochondrial precursor (Hsp60) (60 kDa chaperonin) (CPN60) (Heat shock protein 60) (HSP-60) (Mitochondrial matrix protein P1)
[6]		66547450	18	39.3	6.97	3.6e-11	1610.33	805.67	2	805.449	0.22	AAVEEGIVPGGGTALLR	54	7.9e-08	60413	APIS MELLIFERA	PREDICTED: similar to 60 kDa heat shock protein, mitochondrial precursor (Hsp60) (60 kDa chaperonin) (CPN60) (Heat shock protein 60) (HSP-60) (Mitochondrial matrix protein P1)
[6]		66547450	18	39.3	6.97	3.6e-11	1926.49	963.75	2	963.536	0.21	ISSVQSIIPALELANSQR	63.06	1.2e-07	60413	APIS MELLIFERA	PREDICTED: similar to 60 kDa heat shock protein, mitochondrial precursor (Hsp60) (60 kDa chaperonin) (CPN60) (Heat shock protein 60) (HSP-60) (Mitochondrial matrix protein P1)
[6]		66547450	18	39.3	6.97	3.6e-11	1358.21	679.61	2	679.359	0.25	NVILEQSWGSPK	49.153	6e-07	60413	APIS MELLIFERA	PREDICTED: similar to 60 kDa heat shock protein, mitochondrial precursor (Hsp60) (60 kDa chaperonin) (CPN60) (Heat shock protein 60) (HSP-60) (Mitochondrial matrix protein P1)
[6]		66547450	18	39.3	6.97	3.6e-11	1468.25	734.63	2	734.412	0.22	VEEGIVPGGGTALLR	52.547	8.4e-07	60413	APIS MELLIFERA	PREDICTED: similar to 60 kDa heat shock protein, mitochondrial precursor (Hsp60) (60 kDa chaperonin) (CPN60) (Heat shock protein 60) (HSP-60) (Mitochondrial matrix protein P1)
[6]		66547450	18	39.3	6.97	3.6e-11	1558.37	779.69	2	778.921	0.77	GVDILADAVAVTMGPK	67.008	1.7e-06	60413	APIS MELLIFERA	PREDICTED: similar to 60 kDa heat shock protein, mitochondrial precursor (Hsp60) (60 kDa chaperonin) (CPN60) (Heat shock protein 60) (HSP-60) (Mitochondrial matrix protein P1)
[6]		66547450	18	39.3	6.97	3.6e-11	1133.29	567.15	2	566.805	0.34	AIGNLISDAMK	54.879	5.2e-06	60413	APIS MELLIFERA	PREDICTED: similar to 60 kDa heat shock protein, mitochondrial precursor (Hsp60) (60 kDa chaperonin) (CPN60) (Heat shock protein 60) (HSP-60) (Mitochondrial matrix protein P1)
[6]		66547450	18	39.3	6.97	3.6e-11	2196.9	732.97	3	732.697	0.27	ADVIRDQIANTTSDYEKEK	48.078	0.00066	60413	APIS MELLIFERA	PREDICTED: similar to 60 kDa heat shock protein, mitochondrial precursor (Hsp60) (60 kDa chaperonin) (CPN60) (Heat shock protein 60) (HSP-60) (Mitochondrial matrix protein P1)
[6]		66547450	18	39.3	6.97	3.6e-11	1178.05	589.53	2	588.778	0.75	ASNNDQETGIK	11.934	0.0022	60413	APIS MELLIFERA	PREDICTED: similar to 60 kDa heat shock protein, mitochondrial precursor (Hsp60) (60 kDa chaperonin) (CPN60) (Heat shock protein 60) (HSP-60) (Mitochondrial matrix protein P1)
[6]		66547450	18	39.3	6.97	3.6e-11	1234.19	617.6	2	617.302	0.3	VGGSSEVEVNEK	33.023	0.0079	60413	APIS MELLIFERA	PREDICTED: similar to 60 kDa heat shock protein, mitochondrial precursor (Hsp60) (60 kDa chaperonin) (CPN60) (Heat shock protein 60) (HSP-60) (Mitochondrial matrix protein P1)
[6]		66547450	18	39.3	6.97	3.6e-11	2055.57	685.86	3	685.392	0.47	KISSVQSIIPALELANSQR	60.021	0.013	60413	APIS MELLIFERA	PREDICTED: similar to 60 kDa heat shock protein, mitochondrial precursor (Hsp60) (60 kDa chaperonin) (CPN60) (Heat shock protein 60) (HSP-60) (Mitochondrial matrix protein P1)
[6]		66547450	18	39.3	6.97	3.6e-11	2043.06	681.69	3	682.039	-0.35	SGVAVLRVGGSSEVEVNEKK	16.536	0.016	60413	APIS MELLIFERA	PREDICTED: similar to 60 kDa heat shock protein, mitochondrial precursor (Hsp60) (60 kDa chaperonin) (CPN60) (Heat shock protein 60) (HSP-60) (Mitochondrial matrix protein P1)
[6]		66547450	18	39.3	6.97	3.6e-11	2366.07	789.36	3	789.116	0.24	KPLVIIAEDIDGEALSTLVVNR	81.72	0.027	60413	APIS MELLIFERA	PREDICTED: similar to 60 kDa heat shock protein, mitochondrial precursor (Hsp60) (60 kDa chaperonin) (CPN60) (Heat shock protein 60) (HSP-60) (Mitochondrial matrix protein P1)
[6]		66547450	18	39.3	6.97	3.6e-11	2113.8	705.27	3	705.051	0.22	ALMLQGVDILADAVAVTMGPK	79.543	0.04	60413	APIS MELLIFERA	PREDICTED: similar to 60 kDa heat shock protein, mitochondrial precursor (Hsp60) (60 kDa chaperonin) (CPN60) (Heat shock protein 60) (HSP-60) (Mitochondrial matrix protein P1)
[7]		149939403	18	26.9	6.43	2.6e-10	1906.43	953.72	2	953.452	0.27	LYVSPVSSEYNQYNSR	48.649	2.6e-10	81487.7	APIS MELLIFERA	hexamerin
[7]		149939403	18	26.9	6.43	2.6e-10	2235.47	1118.24	2	1118.03	0.22	YFYEIDNWMLDLNSGLNK	71.301	9.8e-09	81487.7	APIS MELLIFERA	hexamerin
[7]		149939403	18	26.9	6.43	2.6e-10	1630.15	815.58	2	815.379	0.2	VSPVSSEYNQYNSR	18.815	2e-07	81487.7	APIS MELLIFERA	hexamerin
[7]		149939403	18	26.9	6.43	2.6e-10	1814.43	907.72	2	907.474	0.25	YQIVPSALEIFSTSMK	69.032	1.3e-06	81487.7	APIS MELLIFERA	hexamerin
[7]		149939403	18	26.9	6.43	2.6e-10	1306.75	653.88	2	653.872	0.0081	KILGYNLEAASK	45.859	2e-06	81487.7	APIS MELLIFERA	hexamerin
[7]		149939403	18	26.9	6.43	2.6e-10	1914.39	957.7	2	957.466	0.23	IETSLNSDKPFTYNER	47.08	5.5e-06	81487.7	APIS MELLIFERA	hexamerin
[7]		149939403	18	26.9	6.43	2.6e-10	1302.59	651.8	2	651.811	-0.011	STSMKDPAFYR	18.668	1.2e-05	81487.7	APIS MELLIFERA	hexamerin
[7]		149939403	18	26.9	6.43	2.6e-10	1267.67	634.34	2	634.345	-0.005	HITINADKPMK	17.401	1.6e-05	81487.7	APIS MELLIFERA	hexamerin
[7]		149939403	18	26.9	6.43	2.6e-10	1849.01	925.01	2	924.437	0.57	PLYDFNYEGPNMLFK	64.28	1.6e-05	81487.7	APIS MELLIFERA	hexamerin
[7]		149939403	18	26.9	6.43	2.6e-10	1125.53	563.27	2	563.264	0.0058	GEEYLYSHK	17.041	9.3e-05	81487.7	APIS MELLIFERA	hexamerin
[7]		149939403	18	26.9	6.43	2.6e-10	2740.59	914.2	3	913.777	0.42	SFGFPLDKPLYDFNYEGPNMLFK	71.561	0.00013	81487.7	APIS MELLIFERA	hexamerin
[7]		149939403	18	26.9	6.43	2.6e-10	1347.57	674.29	2	673.869	0.42	NKDEIIYPNLK	45.154	0.00046	81487.7	APIS MELLIFERA	hexamerin
[7]		149939403	18	26.9	6.43	2.6e-10	1202.15	601.58	2	601.298	0.28	IIDYYHSYK	18.716	0.00054	81487.7	APIS MELLIFERA	hexamerin
[7]		149939403	18	26.9	6.43	2.6e-10	2178.15	726.72	3	726.332	0.39	EYDLPDYRGEEYLYSHK	52.015	0.0017	81487.7	APIS MELLIFERA	hexamerin
[7]		149939403	18	26.9	6.43	2.6e-10	1104.43	552.72	2	552.789	-0.07	MLDLNSGLNK	47.032	0.0018	81487.7	APIS MELLIFERA	hexamerin
[7]		149939403	18	26.9	6.43	2.6e-10	2757.39	919.8	3	919.109	0.69	SFGFPLDKPLYDFNYEGPNM(Oxidation)LFK	69.684	0.0032	81487.7	APIS MELLIFERA	hexamerin
[7]		149939403	18	26.9	6.43	2.6e-10	2262.09	754.7	3	754.4	0.3	SNGLPFPQRPIWSNFPIYK	65.47	0.022	81487.7	APIS MELLIFERA	hexamerin
[7]		149939403	18	26.9	6.43	2.6e-10	3380.34	845.84	4	845.408	0.43	QAFPFWLPSKEYDLPDYRGEEYLYSHK	64.118	0.043	81487.7	APIS MELLIFERA	hexamerin
[8]		1168320	21	41.5	5.75	6.2e-11	1954.53	977.77	2	977.536	0.23	VAPEEHPVLLTEAPLNPK	51.424	6.2e-11	41803.2	BACDO	RecName: Full=Actin-2, muscle-specific
[8]		1168320	21	41.5	5.75	6.2e-11	1791.37	896.19	2	895.95	0.24	SYELPDGQVITIGNER	56.666	7.1e-10	41803.2	BACDO	RecName: Full=Actin-2, muscle-specific
[8]		1168320	21	41.5	5.75	6.2e-11	1705.31	853.16	2	852.434	0.73	YELPDGQVITIGNER	56.745	2.3e-09	41803.2	BACDO	RecName: Full=Actin-2, muscle-specific
[8]		1168320	21	41.5	5.75	6.2e-11	2569.2	857.07	3	856.434	0.64	DSGDGVSHTVPIYEGYALPHAILR	59.003	3.6e-08	41803.2	BACDO	RecName: Full=Actin-2, muscle-specific
[8]		1168320	21	41.5	5.75	6.2e-11	1171.99	586.5	2	586.289	0.21	HQGVMVGMGQK	17.187	1.2e-07	41803.2	BACDO	RecName: Full=Actin-2, muscle-specific
[8]		1168320	21	41.5	5.75	6.2e-11	1202.21	601.61	2	601.312	0.3	DGQVITIGNER	38.134	2.3e-07	41803.2	BACDO	RecName: Full=Actin-2, muscle-specific
[8]		1168320	21	41.5	5.75	6.2e-11	1412.35	706.68	2	706.381	0.3	LPDGQVITIGNER	48.689	6.1e-06	41803.2	BACDO	RecName: Full=Actin-2, muscle-specific
[8]		1168320	21	41.5	5.75	6.2e-11	1516.33	758.67	2	758.378	0.29	IWHHTFYNELR	46.214	7.5e-06	41803.2	BACDO	RecName: Full=Actin-2, muscle-specific
[8]		1168320	21	41.5	5.75	6.2e-11	1133.29	567.15	2	566.767	0.38	GYSFTTTAER	18.755	2e-05	41803.2	BACDO	RecName: Full=Actin-2, muscle-specific
[8]		1168320	21	41.5	5.75	6.2e-11	1713.13	857.07	2	856.48	0.59	VPIYEGYALPHAILR	59.003	3.5e-05	41803.2	BACDO	RecName: Full=Actin-2, muscle-specific
[8]		1168320	21	41.5	5.75	6.2e-11	1143.83	572.42	2	572.335	0.085	EITALAPSTIK	46.737	4.7e-05	41803.2	BACDO	RecName: Full=Actin-2, muscle-specific
[8]		1168320	21	41.5	5.75	6.2e-11	1199.53	600.27	2	599.856	0.41	AVFPSIVGRPR	47.254	8.8e-05	41803.2	BACDO	RecName: Full=Actin-2, muscle-specific
[8]		1168320	21	41.5	5.75	6.2e-11	1188.21	594.61	2	594.287	0.32	HQGVMVGM(Oxidation)GQK	15.244	0.00025	41803.2	BACDO	RecName: Full=Actin-2, muscle-specific
[8]		1168320	21	41.5	5.75	6.2e-11	2454.7	614.43	4	613.821	0.61	SGDGVSHTVPIYEGYALPHAILR	57.696	0.00047	41803.2	BACDO	RecName: Full=Actin-2, muscle-specific
[8]		1168320	21	41.5	5.75	6.2e-11	1962.69	654.9	3	654.308	0.59	YPIEHGIITNWDDMEK	54.379	0.00048	41803.2	BACDO	RecName: Full=Actin-2, muscle-specific
[8]		1168320	21	41.5	5.75	6.2e-11	3152.7	788.93	4	788.666	0.26	TTGIVLDSGDGVSHTVPIYEGYALPHAILR	63.157	0.0032	41803.2	BACDO	RecName: Full=Actin-2, muscle-specific
[8]		1168320	21	41.5	5.75	6.2e-11	1230.29	615.65	2	615.299	0.35	YDESGPGIVHR	17.525	0.0055	41803.2	BACDO	RecName: Full=Actin-2, muscle-specific
[8]		1168320	21	41.5	5.75	6.2e-11	2366.67	789.56	3	789.082	0.48	GDGVSHTVPIYEGYALPHAILR	62.784	0.0091	41803.2	BACDO	RecName: Full=Actin-2, muscle-specific
[8]		1168320	21	41.5	5.75	6.2e-11	1855.8	619.27	3	619.004	0.27	APEEHPVLLTEAPLNPK	50.179	0.022	41803.2	BACDO	RecName: Full=Actin-2, muscle-specific
[8]		1168320	21	41.5	5.75	6.2e-11	2110.35	704.12	3	704.06	0.06	RVAPEEHPVLLTEAPLNPK	49.004	0.031	41803.2	BACDO	RecName: Full=Actin-2, muscle-specific
[8]		1168320	21	41.5	5.75	6.2e-11	1799.88	600.63	3	600.281	0.35	VGMGQKDSYVGDEAQSK	15.734	0.032	41803.2	BACDO	RecName: Full=Actin-2, muscle-specific
[9]		66545506	15	37.2	5.22	2.7e-09	1963.53	982.27	2	981.494	0.78	SGTIFDNVLITDDPEVAR	61.477	2.7e-09	47174.5	APIS MELLIFERA	PREDICTED: similar to Calreticulin CG9429-PA isoform 1
[9]		66545506	15	37.2	5.22	2.7e-09	2121.55	1061.28	2	1060.99	0.29	FWNDPENDKGIQTSQDAR	45.294	2.4e-08	47174.5	APIS MELLIFERA	PREDICTED: similar to Calreticulin CG9429-PA isoform 1
[9]		66545506	15	37.2	5.22	2.7e-09	2666.82	889.61	3	889.434	0.18	GPWIHPEIDNPEYTPDPELYKR	55.424	3.9e-08	47174.5	APIS MELLIFERA	PREDICTED: similar to Calreticulin CG9429-PA isoform 1
[9]		66545506	15	37.2	5.22	2.7e-09	2645.69	1323.35	2	1322.64	0.71	VLIDNEEVESGELEADWDFLPPK	70.964	1.2e-05	47174.5	APIS MELLIFERA	PREDICTED: similar to Calreticulin CG9429-PA isoform 1
[9]		66545506	15	37.2	5.22	2.7e-09	1295.97	648.49	2	647.783	0.71	MKETQDEEER	4.675	2.3e-05	47174.5	APIS MELLIFERA	PREDICTED: similar to Calreticulin CG9429-PA isoform 1
[9]		66545506	15	37.2	5.22	2.7e-09	1216.47	608.74	2	608.791	-0.051	NWVYSEHPGK	17.867	2.6e-05	47174.5	APIS MELLIFERA	PREDICTED: similar to Calreticulin CG9429-PA isoform 1
[9]		66545506	15	37.2	5.22	2.7e-09	2511.93	837.98	3	837.401	0.58	GPWIHPEIDNPEYTPDPELYK	57.447	2.8e-05	47174.5	APIS MELLIFERA	PREDICTED: similar to Calreticulin CG9429-PA isoform 1
[9]		66545506	15	37.2	5.22	2.7e-09	1649.45	825.23	2	824.914	0.32	FGEEVWKPTLEGEK	51.349	4e-05	47174.5	APIS MELLIFERA	PREDICTED: similar to Calreticulin CG9429-PA isoform 1
[9]		66545506	15	37.2	5.22	2.7e-09	1120.65	560.83	2	560.829	0.00069	KVHVIFSYK	19.745	5.2e-05	47174.5	APIS MELLIFERA	PREDICTED: similar to Calreticulin CG9429-PA isoform 1
[9]		66545506	15	37.2	5.22	2.7e-09	1778.33	889.67	2	888.962	0.71	KFGEEVWKPTLEGEK	48.663	5.5e-05	47174.5	APIS MELLIFERA	PREDICTED: similar to Calreticulin CG9429-PA isoform 1
[9]		66545506	15	37.2	5.22	2.7e-09	1292.37	646.69	2	646.366	0.32	TLIVKPDNTYK	19.058	0.00013	47174.5	APIS MELLIFERA	PREDICTED: similar to Calreticulin CG9429-PA isoform 1
[9]		66545506	15	37.2	5.22	2.7e-09	2772.99	925	3	924.792	0.21	VLIDNEEVESGELEADWDFLPPKK	81.841	0.00019	47174.5	APIS MELLIFERA	PREDICTED: similar to Calreticulin CG9429-PA isoform 1
[9]		66545506	15	37.2	5.22	2.7e-09	1905.21	635.74	3	635.675	0.065	KFGEEVWKPTLEGEKK	46.784	0.00022	47174.5	APIS MELLIFERA	PREDICTED: similar to Calreticulin CG9429-PA isoform 1
[9]		66545506	15	37.2	5.22	2.7e-09	2700.02	675.76	4	675.32	0.44	FLDDSWEKNWVYSEHPGKEFGK	57.2	0.00064	47174.5	APIS MELLIFERA	PREDICTED: similar to Calreticulin CG9429-PA isoform 1
[9]		66545506	15	37.2	5.22	2.7e-09	1165.19	583.1	2	582.751	0.35	FWNDPENDK	19.171	0.0037	47174.5	APIS MELLIFERA	PREDICTED: similar to Calreticulin CG9429-PA isoform 1
[10]		66534655	13	54.1	5.24	3.2e-08	2241.59	1121.3	2	1121.04	0.26	DDWEALEIDSIVDTIHDVR	72.981	3.2e-08	17700.3	APIS MELLIFERA	PREDICTED: similar to Glutathione S transferase S1 CG8938-PA, isoform A, partial
[10]		66534655	13	54.1	5.24	3.2e-08	2756.07	919.36	3	918.791	0.57	SGLAGKDDWEALEIDSIVDTIHDVR	70.407	1.5e-07	17700.3	APIS MELLIFERA	PREDICTED: similar to Glutathione S transferase S1 CG8938-PA, isoform A, partial
[10]		66534655	13	54.1	5.24	3.2e-08	1594.27	797.64	2	796.883	0.76	LAAFHYEENEEIK	46.911	1.3e-06	17700.3	APIS MELLIFERA	PREDICTED: similar to Glutathione S transferase S1 CG8938-PA, isoform A, partial
[10]		66534655	13	54.1	5.24	3.2e-08	2884.66	721.92	4	721.369	0.55	KSGLAGKDDWEALEIDSIVDTIHDVR	67.817	1.8e-06	17700.3	APIS MELLIFERA	PREDICTED: similar to Glutathione S transferase S1 CG8938-PA, isoform A, partial
[10]		66534655	13	54.1	5.24	3.2e-08	1467.15	734.08	2	733.88	0.2	IADEVVPYYLER	53.543	1.9e-06	17700.3	APIS MELLIFERA	PREDICTED: similar to Glutathione S transferase S1 CG8938-PA, isoform A, partial
[10]		66534655	13	54.1	5.24	3.2e-08	2290.47	1145.74	2	1145.08	0.66	SFVALLDYLNFMNGSDLIEK	79.134	2.2e-06	17700.3	APIS MELLIFERA	PREDICTED: similar to Glutathione S transferase S1 CG8938-PA, isoform A, partial
[10]		66534655	13	54.1	5.24	3.2e-08	1595.37	798.19	2	797.927	0.26	KIADEVVPYYLER	52.042	3.4e-06	17700.3	APIS MELLIFERA	PREDICTED: similar to Glutathione S transferase S1 CG8938-PA, isoform A, partial
[10]		66534655	13	54.1	5.24	3.2e-08	1274.25	637.63	2	637.343	0.29	FGQVPVLDVDGK	57.682	0.00037	17700.3	APIS MELLIFERA	PREDICTED: similar to Glutathione S transferase S1 CG8938-PA, isoform A, partial
[10]		66534655	13	54.1	5.24	3.2e-08	1283.27	642.14	2	641.819	0.32	DEVVPYYLER	50.993	0.00052	17700.3	APIS MELLIFERA	PREDICTED: similar to Glutathione S transferase S1 CG8938-PA, isoform A, partial
[10]		66534655	13	54.1	5.24	3.2e-08	1384.09	692.55	2	691.867	0.68	IDSIVDTIHDVR	70.687	0.00066	17700.3	APIS MELLIFERA	PREDICTED: similar to Glutathione S transferase S1 CG8938-PA, isoform A, partial
[10]		66534655	13	54.1	5.24	3.2e-08	1256.19	628.6	2	627.856	0.74	GQVPVLDVDGKK	41.204	0.0013	17700.3	APIS MELLIFERA	PREDICTED: similar to Glutathione S transferase S1 CG8938-PA, isoform A, partial
[10]		66534655	13	54.1	5.24	3.2e-08	2428.38	810.13	3	809.399	0.73	GKDDWEALEIDSIVDTIHDVR	69.7	0.0042	17700.3	APIS MELLIFERA	PREDICTED: similar to Glutathione S transferase S1 CG8938-PA, isoform A, partial
[10]		66534655	13	54.1	5.24	3.2e-08	1190.57	595.79	2	595.77	0.02	HYEENEEIK	16.3	0.014	17700.3	APIS MELLIFERA	PREDICTED: similar to Glutathione S transferase S1 CG8938-PA, isoform A, partial
[11]		12585365	12	28	4.79	2.2e-08	1765.41	883.21	2	882.954	0.26	YTEGAELVDSVLDVVR	69.654	2.2e-08	50230.9	MANSE	RecName: Full=Tubulin beta-1 chain; AltName: Full=Beta-1-tubulin
[11]		12585365	12	28	4.79	2.2e-08	1959.45	980.23	2	979.995	0.24	GHYTEGAELVDSVLDVVR	66.647	7.5e-08	50230.9	MANSE	RecName: Full=Tubulin beta-1 chain; AltName: Full=Beta-1-tubulin
[11]		12585365	12	28	4.79	2.2e-08	1336.25	668.63	2	668.326	0.3	VFGQSGAGNNWAK	41.168	1.8e-05	50230.9	MANSE	RecName: Full=Tubulin beta-1 chain; AltName: Full=Beta-1-tubulin
[11]		12585365	12	28	4.79	2.2e-08	1131.31	566.16	2	565.801	0.36	FPGQLNADLR	47.993	2.9e-05	50230.9	MANSE	RecName: Full=Tubulin beta-1 chain; AltName: Full=Beta-1-tubulin
[11]		12585365	12	28	4.79	2.2e-08	1319.29	660.15	2	659.819	0.33	VDLEPGTMDSVR	47.28	5.9e-05	50230.9	MANSE	RecName: Full=Tubulin beta-1 chain; AltName: Full=Beta-1-tubulin
[11]		12585365	12	28	4.79	2.2e-08	2089.32	697.11	3	696.364	0.75	GHYTEGAELVDSVLDVVRK	64.104	6.2e-05	50230.9	MANSE	RecName: Full=Tubulin beta-1 chain; AltName: Full=Beta-1-tubulin
[11]		12585365	12	28	4.79	2.2e-08	1316.07	658.54	2	657.82	0.72	INVYYNEASGGK	19.186	0.00022	50230.9	MANSE	RecName: Full=Tubulin beta-1 chain; AltName: Full=Beta-1-tubulin
[11]		12585365	12	28	4.79	2.2e-08	1321.41	661.21	2	660.861	0.35	IGNSTAIQELFK	56.203	0.00033	50230.9	MANSE	RecName: Full=Tubulin beta-1 chain; AltName: Full=Beta-1-tubulin
[11]		12585365	12	28	4.79	2.2e-08	1698.27	849.64	2	848.92	0.72	NSSYFVEWIPNNVK	60.379	0.00037	50230.9	MANSE	RecName: Full=Tubulin beta-1 chain; AltName: Full=Beta-1-tubulin
[11]		12585365	12	28	4.79	2.2e-08	2799.87	933.96	3	933.453	0.51	SGPFGQIFRPDNFVFGQSGAGNNWAK	65.697	0.0011	50230.9	MANSE	RecName: Full=Tubulin beta-1 chain; AltName: Full=Beta-1-tubulin
[11]		12585365	12	28	4.79	2.2e-08	1431.61	716.31	2	716.361	-0.051	LVDLEPGTMDSVR	51.007	0.028	50230.9	MANSE	RecName: Full=Tubulin beta-1 chain; AltName: Full=Beta-1-tubulin
[11]		12585365	12	28	4.79	2.2e-08	2099.28	700.43	3	700.355	0.075	EIVHIQAGQCGNQIGAKFW	28.783	0.03	50230.9	MANSE	RecName: Full=Tubulin beta-1 chain; AltName: Full=Beta-1-tubulin
[12]		66557932	10	14.8	5.47	8.5e-09	1673.07	837.04	2	836.902	0.14	FFNDGDYIQAVIDR	61.232	8.5e-09	97330	APIS MELLIFERA	PREDICTED: similar to Glycogen phosphorylase isoform 2
[12]		66557932	10	14.8	5.47	8.5e-09	1534.37	767.69	2	767.39	0.3	WIEMAINNIASSGK	56.7	8.8e-08	97330	APIS MELLIFERA	PREDICTED: similar to Glycogen phosphorylase isoform 2
[12]		66557932	10	14.8	5.47	8.5e-09	1299.19	650.1	2	649.775	0.32	GYNAYDYYNR	40.91	1.9e-06	97330	APIS MELLIFERA	PREDICTED: similar to Glycogen phosphorylase isoform 2
[12]		66557932	10	14.8	5.47	8.5e-09	1331.37	666.19	2	665.872	0.32	VNPASIFDIQVK	60.007	1.1e-05	97330	APIS MELLIFERA	PREDICTED: similar to Glycogen phosphorylase isoform 2
[12]		66557932	10	14.8	5.47	8.5e-09	1430.29	715.65	2	715.379	0.27	WPTSMLESILPR	67.19	1.1e-05	97330	APIS MELLIFERA	PREDICTED: similar to Glycogen phosphorylase isoform 2
[12]		66557932	10	14.8	5.47	8.5e-09	1443.33	722.17	2	721.851	0.32	VLYPNDNFFEGK	53.632	0.00031	97330	APIS MELLIFERA	PREDICTED: similar to Glycogen phosphorylase isoform 2
[12]		66557932	10	14.8	5.47	8.5e-09	1386.53	693.77	2	693.844	-0.074	EIWGVEPSWQR	54.229	0.0019	97330	APIS MELLIFERA	PREDICTED: similar to Glycogen phosphorylase isoform 2
[12]		66557932	10	14.8	5.47	8.5e-09	1412.33	706.67	2	706.395	0.27	ILIDVEGLPWEK	63.866	0.0033	97330	APIS MELLIFERA	PREDICTED: similar to Glycogen phosphorylase isoform 2
[12]		66557932	10	14.8	5.47	8.5e-09	2301.06	767.69	3	767.367	0.32	YQDESKW(Oxidation)IEMAINNIASSGK	56.7	0.0085	97330	APIS MELLIFERA	PREDICTED: similar to Glycogen phosphorylase isoform 2
[12]		66557932	10	14.8	5.47	8.5e-09	2508.78	836.93	3	836.758	0.17	ARPEFMLPVNFYGQVIDTPEGK	64.855	0.029	97330	APIS MELLIFERA	PREDICTED: similar to Glycogen phosphorylase isoform 2
[13]		110776421	11	35.1	5.07	4.6e-09	1742.57	871.79	2	871.418	0.37	IINNDFNFNDVNFR	58.621	4.6e-09	39670.1	APIS MELLIFERA	PREDICTED: similar to yellow-e2 CG17044-PA
[13]		110776421	11	35.1	5.07	4.6e-09	1152.27	576.64	2	576.319	0.32	LTVAGESFTVK	51.229	9.9e-07	39670.1	APIS MELLIFERA	PREDICTED: similar to yellow-e2 CG17044-PA
[13]		110776421	11	35.1	5.07	4.6e-09	1722.57	861.79	2	861.891	-0.1	NDPEGNEYMLALSNR	51.526	1.5e-06	39670.1	APIS MELLIFERA	PREDICTED: similar to yellow-e2 CG17044-PA
[13]		110776421	11	35.1	5.07	4.6e-09	1688.39	844.7	2	843.902	0.8	YEGSQDILNTQSFGK	50.692	2.3e-06	39670.1	APIS MELLIFERA	PREDICTED: similar to yellow-e2 CG17044-PA
[13]		110776421	11	35.1	5.07	4.6e-09	1217.37	609.19	2	608.821	0.37	ILGANVDDLMR	54.062	2.7e-06	39670.1	APIS MELLIFERA	PREDICTED: similar to yellow-e2 CG17044-PA
[13]		110776421	11	35.1	5.07	4.6e-09	1329.17	665.09	2	664.809	0.28	LTSNTFDYDPR	45.356	1.8e-05	39670.1	APIS MELLIFERA	PREDICTED: similar to yellow-e2 CG17044-PA
[13]		110776421	11	35.1	5.07	4.6e-09	2613.36	871.79	3	872.431	-0.64	LSNRM(Oxidation)QKIINNDFNFNDVNFR	58.621	0.001	39670.1	APIS MELLIFERA	PREDICTED: similar to yellow-e2 CG17044-PA
[13]		110776421	11	35.1	5.07	4.6e-09	1120.41	560.71	2	560.277	0.43	LGANVDDLM(Oxidation)R	41.572	0.0018	39670.1	APIS MELLIFERA	PREDICTED: similar to yellow-e2 CG17044-PA
[13]		110776421	11	35.1	5.07	4.6e-09	1232.61	616.81	2	616.819	-0.0088	ILGANVDDLM(Oxidation)R	48.228	0.01	39670.1	APIS MELLIFERA	PREDICTED: similar to yellow-e2 CG17044-PA
[13]		110776421	11	35.1	5.07	4.6e-09	2298.79	1149.9	2	1149.55	0.35	ESFDVVAQNEETLQMIVSMK	96.348	0.027	39670.1	APIS MELLIFERA	PREDICTED: similar to yellow-e2 CG17044-PA
[13]		110776421	11	35.1	5.07	4.6e-09	2723.74	681.69	4	682.149	-0.46	IEMIIKFIILQNYIKSINYQLK	16.536	0.036	39670.1	APIS MELLIFERA	PREDICTED: similar to yellow-e2 CG17044-PA
[14]		58585254	8	49.7	6.31	1e-09	1974.19	987.6	2	986.917	0.68	FMEEDTDTEAMQQELR	51.738	1e-09	17171.3	APIS MELLIFERA	troponin C type IIIb
[14]		58585254	8	49.7	6.31	1e-09	1802.55	901.78	2	901.472	0.31	Acetyl-MDEIQLSKDQIAQLK	58.836	3.9e-07	17171.3	APIS MELLIFERA	troponin C type IIIb
[14]		58585254	8	49.7	6.31	1e-09	1154.09	577.55	2	577.28	0.27	GFEAFDPDKK	36.99	1.3e-06	17171.3	APIS MELLIFERA	troponin C type IIIb
[14]		58585254	8	49.7	6.31	1e-09	1372.21	686.61	2	686.331	0.28	EGNGYITTDVFR	51.438	1.2e-05	17171.3	APIS MELLIFERA	troponin C type IIIb
[14]		58585254	8	49.7	6.31	1e-09	1301.43	651.22	2	650.798	0.42	M(Oxidation)GFEAFDPDKK	42.938	0.00017	17171.3	APIS MELLIFERA	troponin C type IIIb
[14]		58585254	8	49.7	6.31	1e-09	1284.53	642.77	2	642.8	-0.03	MGFEAFDPDKK	47.683	0.00031	17171.3	APIS MELLIFERA	troponin C type IIIb
[14]		58585254	8	49.7	6.31	1e-09	1891.59	631.2	3	630.979	0.22	LYDKEGNGYITTDVFR	51.889	0.0014	17171.3	APIS MELLIFERA	troponin C type IIIb
[14]		58585254	8	49.7	6.31	1e-09	1858.59	620.2	3	619.644	0.56	GTITTDTVGTILSMMGMK	76.799	0.0033	17171.3	APIS MELLIFERA	troponin C type IIIb
[15]		58585154	11	44.3	4.81	1.4e-09	1513.47	757.24	2	756.463	0.78	VLTTGLPALISWIK	89.644	1.4e-09	7584.9	APIS MELLIFERA	melittin precursor
[15]		58585154	11	44.3	4.81	1.4e-09	1544.47	772.74	2	772.458	0.28	VLTTGLPALISW(Dioxidation)IK	72.1	3.2e-08	7584.9	APIS MELLIFERA	melittin precursor
[15]		58585154	11	44.3	4.81	1.4e-09	2339.16	780.39	3	780.145	0.24	GIGAVLKVLTTGLPALISW(Dioxidation)IKR	85.2	8.1e-08	7584.9	APIS MELLIFERA	melittin precursor
[15]		58585154	11	44.3	4.81	1.4e-09	2307.03	769.68	3	769.482	0.2	GIGAVLKVLTTGLPALISWIKR	84.786	3e-07	7584.9	APIS MELLIFERA	melittin precursor
[15]		58585154	11	44.3	4.81	1.4e-09	1333.33	667.17	2	666.382	0.79	TTGLPALISW(Dioxidation)IK	67.5	1.1e-06	7584.9	APIS MELLIFERA	melittin precursor
[15]		58585154	11	44.3	4.81	1.4e-09	1413.43	707.22	2	706.929	0.29	LTTGLPALISWIK	70.935	9.6e-06	7584.9	APIS MELLIFERA	melittin precursor
[15]		58585154	11	44.3	4.81	1.4e-09	1300.41	650.71	2	650.387	0.32	TTGLPALISWIK	68.394	1.5e-05	7584.9	APIS MELLIFERA	melittin precursor
[15]		58585154	11	44.3	4.81	1.4e-09	1198.63	599.82	2	599.863	-0.043	TGLPALISWIK	67.298	0.00021	7584.9	APIS MELLIFERA	melittin precursor
[15]		58585154	11	44.3	4.81	1.4e-09	1444.69	722.85	2	722.924	-0.074	LTTGLPALISW(Dioxidation)IK	70.385	0.00055	7584.9	APIS MELLIFERA	melittin precursor
[15]		58585154	11	44.3	4.81	1.4e-09	2151.3	717.77	3	717.449	0.32	GIGAVLKVLTTGLPALISWIK	87.303	0.02	7584.9	APIS MELLIFERA	melittin precursor
[15]		58585154	11	44.3	4.81	1.4e-09	3022.86	756.47	4	755.673	0.8	ADAEADPEAGIGAVLKVLTTGLPALISWIK	83.046	0.039	7584.9	APIS MELLIFERA	melittin precursor
[16]		66508940	8	28.5	6.1	1.1e-09	2794.75	1397.88	2	1397.7	0.18	VYAVAGEIIDGYLYDLLMNYLEEK	87.036	1.1e-09	29906.9	APIS MELLIFERA	PREDICTED: similar to CG6459-PA
[16]		66508940	8	28.5	6.1	1.1e-09	1633.39	817.2	2	816.94	0.26	ELVEFLAEEIIAEK	71.34	2.5e-08	29906.9	APIS MELLIFERA	PREDICTED: similar to CG6459-PA
[16]		66508940	8	28.5	6.1	1.1e-09	1260.15	630.58	2	630.327	0.25	VSLDGADVNLEK	48.413	8.3e-07	29906.9	APIS MELLIFERA	PREDICTED: similar to CG6459-PA
[16]		66508940	8	28.5	6.1	1.1e-09	1543.69	772.35	2	772.389	-0.039	LYDLLMNYLEEK	66.037	1.7e-05	29906.9	APIS MELLIFERA	PREDICTED: similar to CG6459-PA
[16]		66508940	8	28.5	6.1	1.1e-09	2441.49	814.5	3	813.76	0.74	LIDLSTSYEHTAYVSLLEGLSK	101.739	0.00019	29906.9	APIS MELLIFERA	PREDICTED: similar to CG6459-PA
[16]		66508940	8	28.5	6.1	1.1e-09	1161.11	581.06	2	580.793	0.27	SLDGADVNLEK	41.821	0.00068	29906.9	APIS MELLIFERA	PREDICTED: similar to CG6459-PA
[16]		66508940	8	28.5	6.1	1.1e-09	2091.12	697.71	3	697.052	0.66	AEKELVEFLAEEIIAEKK	65.675	0.0085	29906.9	APIS MELLIFERA	PREDICTED: similar to CG6459-PA
[16]		66508940	8	28.5	6.1	1.1e-09	1963.14	655.05	3	654.354	0.7	AEKELVEFLAEEIIAEK	70.213	0.014	29906.9	APIS MELLIFERA	PREDICTED: similar to CG6459-PA
[17]		110758758	18	8.7	3.19	1.2e-06	1418.17	709.59	2	708.836	0.75	ITESGTEFGNAYK	41.265	1.2e-06	374763	APIS MELLIFERA	PREDICTED: similar to Retinoid- and fatty-acid binding protein CG11064-PA isoform 1
[17]		110758758	18	8.7	3.19	1.2e-06	1530.29	765.65	2	765.399	0.25	SSPLLGSQQSIEQR	44.853	5.8e-06	374763	APIS MELLIFERA	PREDICTED: similar to Retinoid- and fatty-acid binding protein CG11064-PA isoform 1
[17]		110758758	18	8.7	3.19	1.2e-06	1385.51	693.26	2	693.393	-0.13	SIIFESPQPVLR	54.605	1.2e-05	374763	APIS MELLIFERA	PREDICTED: similar to Retinoid- and fatty-acid binding protein CG11064-PA isoform 1
[17]		110758758	18	8.7	3.19	1.2e-06	1256.49	628.75	2	628.828	-0.078	ADNPTVTVSQPK	17.748	0.00026	374763	APIS MELLIFERA	PREDICTED: similar to Retinoid- and fatty-acid binding protein CG11064-PA isoform 1
[17]		110758758	18	8.7	3.19	1.2e-06	2313.69	771.9	3	771.745	0.16	EVLDKETVNQVGSFIQTHLR	63.655	0.00044	374763	APIS MELLIFERA	PREDICTED: similar to Retinoid- and fatty-acid binding protein CG11064-PA isoform 1
[17]		110758758	18	8.7	3.19	1.2e-06	1757.58	586.53	3	586.289	0.24	DKTEYTYQAYIHPK	44.959	0.00067	374763	APIS MELLIFERA	PREDICTED: similar to Retinoid- and fatty-acid binding protein CG11064-PA isoform 1
[17]		110758758	18	8.7	3.19	1.2e-06	1124.17	562.59	2	561.793	0.8	LTDAYEAAIR	43.345	0.0011	374763	APIS MELLIFERA	PREDICTED: similar to Retinoid- and fatty-acid binding protein CG11064-PA isoform 1
[17]		110758758	18	8.7	3.19	1.2e-06	2185.56	729.19	3	728.704	0.49	QFLKPDFGYNTENIAELGK	58.696	0.0033	374763	APIS MELLIFERA	PREDICTED: similar to Retinoid- and fatty-acid binding protein CG11064-PA isoform 1
[17]		110758758	18	8.7	3.19	1.2e-06	1328.11	664.56	2	664.352	0.21	AEVAGGVKPDAASR	16.414	0.0047	374763	APIS MELLIFERA	PREDICTED: similar to Retinoid- and fatty-acid binding protein CG11064-PA isoform 1
[17]		110758758	18	8.7	3.19	1.2e-06	1232.45	616.73	2	616.361	0.37	LGYLGVGQVIGR	53.708	0.0051	374763	APIS MELLIFERA	PREDICTED: similar to Retinoid- and fatty-acid binding protein CG11064-PA isoform 1
[17]		110758758	18	8.7	3.19	1.2e-06	1158.23	579.62	2	579.325	0.3	VGSFIQTHLR	63.466	0.0071	374763	APIS MELLIFERA	PREDICTED: similar to Retinoid- and fatty-acid binding protein CG11064-PA isoform 1
[17]		110758758	18	8.7	3.19	1.2e-06	1952.46	651.49	3	651.014	0.48	LELVSSLLDSDEKDLFK	66.202	0.0092	374763	APIS MELLIFERA	PREDICTED: similar to Retinoid- and fatty-acid binding protein CG11064-PA isoform 1
[17]		110758758	18	8.7	3.19	1.2e-06	1834.92	612.31	3	612.002	0.31	NGKSISITVTSDGKNIVT	49.569	0.026	374763	APIS MELLIFERA	PREDICTED: similar to Retinoid- and fatty-acid binding protein CG11064-PA isoform 1
[17]		110758758	18	8.7	3.19	1.2e-06	2559.18	853.73	3	853.403	0.33	DVYGYVLDETSAEGSDFVDHLVK	71.051	0.027	374763	APIS MELLIFERA	PREDICTED: similar to Retinoid- and fatty-acid binding protein CG11064-PA isoform 1
[17]		110758758	18	8.7	3.19	1.2e-06	2916.24	972.75	3	972.197	0.55	Acetyl-MCGAVIKWCLVLIEVQVSTRGIPFPL	50.002	0.046	374763	APIS MELLIFERA	PREDICTED: similar to Retinoid- and fatty-acid binding protein CG11064-PA isoform 1
[17]		110758758	18	8.7	3.19	1.2e-06	2447.94	816.65	3	816.386	0.26	RAVVSMFQSAIM(Oxidation)QDSGSTIHHE	78.55	0.047	374763	APIS MELLIFERA	PREDICTED: similar to Retinoid- and fatty-acid binding protein CG11064-PA isoform 1
[17]		110758758	18	8.7	3.19	1.2e-06	2533.62	634.16	4	634.322	-0.16	EFKNPIFDHTTNLYLHSSKDK	67.547	0.047	374763	APIS MELLIFERA	PREDICTED: similar to Retinoid- and fatty-acid binding protein CG11064-PA isoform 1
[17]		110758758	18	8.7	3.19	1.2e-06	2760.94	690.99	4	690.854	0.14	TSLSAIGDINVDKNSLSLSGETKFTY	106.728	0.05	374763	APIS MELLIFERA	PREDICTED: similar to Retinoid- and fatty-acid binding protein CG11064-PA isoform 1
[18]		110748949	10	24.7	4.43	2.7e-08	1612.47	806.74	2	806.457	0.28	ASPQEIAAATVTALLR	71.683	2.7e-08	39600.6	APIS MELLIFERA	PREDICTED: similar to Aldolase CG6058-PF, isoform F
[18]		110748949	10	24.7	4.43	2.7e-08	1347.29	674.15	2	673.862	0.29	GILAADESTATIGK	46.649	8.8e-08	39600.6	APIS MELLIFERA	PREDICTED: similar to Aldolase CG6058-PF, isoform F
[18]		110748949	10	24.7	4.43	2.7e-08	1112.23	556.62	2	556.327	0.29	SIAQQIVAPGK	41.323	3.4e-07	39600.6	APIS MELLIFERA	PREDICTED: similar to Aldolase CG6058-PF, isoform F
[18]		110748949	10	24.7	4.43	2.7e-08	1503.11	752.06	2	751.912	0.15	GILAADESTATIGKR	44.137	6e-07	39600.6	APIS MELLIFERA	PREDICTED: similar to Aldolase CG6058-PF, isoform F
[18]		110748949	10	24.7	4.43	2.7e-08	1500.47	750.74	2	750.904	-0.16	EQISAGQEELIKR	41.895	7.1e-06	39600.6	APIS MELLIFERA	PREDICTED: similar to Aldolase CG6058-PF, isoform F
[18]		110748949	10	24.7	4.43	2.7e-08	1297.31	649.16	2	648.885	0.27	LAILENANVLAR	55.662	1.5e-05	39600.6	APIS MELLIFERA	PREDICTED: similar to Aldolase CG6058-PF, isoform F
[18]		110748949	10	24.7	4.43	2.7e-08	1305.29	653.15	2	652.84	0.31	ADDGTPFVELLK	58.443	1.5e-05	39600.6	APIS MELLIFERA	PREDICTED: similar to Aldolase CG6058-PF, isoform F
[18]		110748949	10	24.7	4.43	2.7e-08	1345.23	673.12	2	672.854	0.27	EQISAGQEELIK	45.184	2.6e-05	39600.6	APIS MELLIFERA	PREDICTED: similar to Aldolase CG6058-PF, isoform F
[18]		110748949	10	24.7	4.43	2.7e-08	1471.99	736.5	2	736.901	-0.4	KEQISAGQEELIK	30.599	0.0032	39600.6	APIS MELLIFERA	PREDICTED: similar to Aldolase CG6058-PF, isoform F
[18]		110748949	10	24.7	4.43	2.7e-08	1200.21	600.61	2	599.856	0.75	LTPELKQELK	22.001	0.01	39600.6	APIS MELLIFERA	PREDICTED: similar to Aldolase CG6058-PF, isoform F
[19]		126002169	9	18.4	5.07	3.3e-08	1922.83	961.92	2	961.486	0.43	DQEGQDVLLFIDNIFR	79.863	3.3e-08	54348.8	DROSOPHILA PSEUDOOBSCURA PSEUDOOBSCURA	ATPsyn-beta
[19]		126002169	9	18.4	5.07	3.3e-08	1263.25	632.13	2	631.824	0.31	TIAMDGTEGLVR	48.092	3.9e-07	54348.8	DROSOPHILA PSEUDOOBSCURA PSEUDOOBSCURA	ATPsyn-beta
[19]		126002169	9	18.4	5.07	3.3e-08	1458.15	729.58	2	729.423	0.16	TVLIMELINNVAK	71.595	7.4e-07	54348.8	DROSOPHILA PSEUDOOBSCURA PSEUDOOBSCURA	ATPsyn-beta
[19]		126002169	9	18.4	5.07	3.3e-08	1436.27	718.64	2	718.381	0.26	FTQAGSEVSALLGR	55.376	6.3e-06	54348.8	DROSOPHILA PSEUDOOBSCURA PSEUDOOBSCURA	ATPsyn-beta
[19]		126002169	9	18.4	5.07	3.3e-08	1142.13	571.57	2	571.296	0.27	NVIGEPIDER	33.711	1.7e-05	54348.8	DROSOPHILA PSEUDOOBSCURA PSEUDOOBSCURA	ATPsyn-beta
[19]		126002169	9	18.4	5.07	3.3e-08	1289.47	645.24	2	644.846	0.39	TQAGSEVSALLGR	61.463	0.012	54348.8	DROSOPHILA PSEUDOOBSCURA PSEUDOOBSCURA	ATPsyn-beta
[19]		126002169	9	18.4	5.07	3.3e-08	1714.29	572.1	3	571.31	0.79	LGRIMNVIGEPIDER	27.193	0.018	54348.8	DROSOPHILA PSEUDOOBSCURA PSEUDOOBSCURA	ATPsyn-beta
[19]		126002169	9	18.4	5.07	3.3e-08	1847.16	616.39	3	616.332	0.058	VRTIAM(Oxidation)DGTEGLVRGQK	112.325	0.035	54348.8	DROSOPHILA PSEUDOOBSCURA PSEUDOOBSCURA	ATPsyn-beta
[19]		126002169	9	18.4	5.07	3.3e-08	1964.28	655.43	3	655.007	0.42	FLSQPFQVAEVFTGHAGK	62.521	0.036	54348.8	DROSOPHILA PSEUDOOBSCURA PSEUDOOBSCURA	ATPsyn-beta
[20]		229892248	8	13.7	5.07	1e-08	1349.69	675.35	2	675.371	-0.021	TLTILDSGIGMTK	55.781	1e-08	83384.3	APIS MELLIFERA	heat shock protein 90
[20]		229892248	8	13.7	5.07	1e-08	1596.03	798.52	2	798.321	0.2	GFDDDDTPNVEDEK	41.46	1.5e-07	83384.3	APIS MELLIFERA	heat shock protein 90
[20]		229892248	8	13.7	5.07	1e-08	1834.39	917.7	2	917.394	0.31	NPDDISQEEYGEFYK	50.257	2.1e-07	83384.3	APIS MELLIFERA	heat shock protein 90
[20]		229892248	8	13.7	5.07	1e-08	1514.29	757.65	2	757.396	0.25	GVVDSEDLPLNISR	54.09	7.4e-07	83384.3	APIS MELLIFERA	heat shock protein 90
[20]		229892248	8	13.7	5.07	1e-08	1229.13	615.07	2	614.848	0.22	ADLVNNLGTIAK	50.151	1.1e-06	83384.3	APIS MELLIFERA	heat shock protein 90
[20]		229892248	8	13.7	5.07	1e-08	1190.31	595.66	2	595.322	0.34	HSQFIGYPIK	45.067	2.5e-05	83384.3	APIS MELLIFERA	heat shock protein 90
[20]		229892248	8	13.7	5.07	1e-08	1266.21	633.61	2	633.31	0.3	EQVANSSFVER	18.183	0.00022	83384.3	APIS MELLIFERA	heat shock protein 90
[20]		229892248	8	13.7	5.07	1e-08	1168.37	584.69	2	584.789	-0.099	LGIHEDSQNR	11.886	0.013	83384.3	APIS MELLIFERA	heat shock protein 90
[21]		110763974	12	39.9	4.04	8e-08	1493.69	747.35	2	746.891	0.46	ANNTNYGLAAGVVTK	45.88	8e-08	49162.4	APIS MELLIFERA	PREDICTED: similar to CG31075-PA isoform 1
[21]		110763974	12	39.9	4.04	8e-08	1518.35	759.68	2	759.855	-0.18	SGQEEGAVLETGGER	18.095	1.2e-07	49162.4	APIS MELLIFERA	PREDICTED: similar to CG31075-PA isoform 1
[21]		110763974	12	39.9	4.04	8e-08	1294.29	647.65	2	647.325	0.32	INNNFVDSVSGK	45.459	3.9e-07	49162.4	APIS MELLIFERA	PREDICTED: similar to CG31075-PA isoform 1
[21]		110763974	12	39.9	4.04	8e-08	1580.23	790.62	2	790.414	0.21	ELGAEGLKEYLETK	53.455	6.6e-05	49162.4	APIS MELLIFERA	PREDICTED: similar to CG31075-PA isoform 1
[21]		110763974	12	39.9	4.04	8e-08	1673.22	558.41	3	557.994	0.42	IAKEEIFGPVQSILK	59.585	0.00033	49162.4	APIS MELLIFERA	PREDICTED: similar to CG31075-PA isoform 1
[21]		110763974	12	39.9	4.04	8e-08	1122.09	561.55	2	561.261	0.29	ETMDEVIER	41.094	0.0031	49162.4	APIS MELLIFERA	PREDICTED: similar to CG31075-PA isoform 1
[21]		110763974	12	39.9	4.04	8e-08	1233.39	617.2	2	616.825	0.38	HGNVGYFIKPT	38.723	0.0032	49162.4	APIS MELLIFERA	PREDICTED: similar to CG31075-PA isoform 1
[21]		110763974	12	39.9	4.04	8e-08	1360.17	680.59	2	680.38	0.21	EEIFGPVQSILK	61.497	0.0036	49162.4	APIS MELLIFERA	PREDICTED: similar to CG31075-PA isoform 1
[21]		110763974	12	39.9	4.04	8e-08	1285.13	643.07	2	642.793	0.28	FETM(Oxidation)DEVIER	40.183	0.0037	49162.4	APIS MELLIFERA	PREDICTED: similar to CG31075-PA isoform 1
[21]		110763974	12	39.9	4.04	8e-08	2663.06	666.52	4	666.062	0.46	KVGDPFNSETQQGPQIDEEMFHK	53.218	0.0048	49162.4	APIS MELLIFERA	PREDICTED: similar to CG31075-PA isoform 1
[21]		110763974	12	39.9	4.04	8e-08	1943.65	972.33	2	972.025	0.31	KEPVGVVGQIIPWNYPF	69.851	0.0096	49162.4	APIS MELLIFERA	PREDICTED: similar to CG31075-PA isoform 1
[21]		110763974	12	39.9	4.04	8e-08	4877.46	1220.12	4	1220.17	-0.047	LAWKW(Oxidation)SPALATGCTIVLKPAEQTPLSALYAAALAKEVGHLIMAASAK	95.432	0.026	49162.4	APIS MELLIFERA	PREDICTED: similar to CG31075-PA isoform 1
[22]		7688	8	78.4	5.08	9.5e-09	1739.29	870.15	2	869.942	0.21	VFDKDGNGFISAAELR	52.695	9.5e-09	16679.5	DROSOPHILA MELANOGASTER	unnamed protein product
[22]		7688	8	78.4	5.08	9.5e-09	1846.31	923.66	2	922.949	0.71	EAFSLFDKDGDGTITTK	52.722	1.8e-08	16679.5	DROSOPHILA MELANOGASTER	unnamed protein product
[22]		7688	8	78.4	5.08	9.5e-09	3390.18	1130.73	3	1130.55	0.18	Acetyl-ADQLTEEQIAEFKEAFSLFDKDGDGTITTK	73.73	7e-08	16679.5	DROSOPHILA MELANOGASTER	unnamed protein product
[22]		7688	8	78.4	5.08	9.5e-09	1565.25	783.13	2	782.38	0.75	Acetyl-ADQLTEEQIAEFK	56.627	3.7e-07	16679.5	DROSOPHILA MELANOGASTER	unnamed protein product
[22]		7688	8	78.4	5.08	9.5e-09	1349.49	675.25	2	675.316	-0.066	LTDEEVDEMIR	50.797	4.7e-06	16679.5	DROSOPHILA MELANOGASTER	unnamed protein product
[22]		7688	8	78.4	5.08	9.5e-09	1857.06	619.69	3	619.288	0.4	MKDTDSEEEIREAFR	47.534	0.00034	16679.5	DROSOPHILA MELANOGASTER	unnamed protein product
[22]		7688	8	78.4	5.08	9.5e-09	1354.05	677.53	2	676.804	0.73	MKDTDSEEEIR	16.271	0.0013	16679.5	DROSOPHILA MELANOGASTER	unnamed protein product
[22]		7688	8	78.4	5.08	9.5e-09	5431.3	1358.58	4	1358.9	-0.32	TITTKELGTVM(Oxidation)RSLGQNPTEAELQDM(Oxidation)INEVDADGNGTIDFPEFLTMMAR	81.936	0.0087	16679.5	DROSOPHILA MELANOGASTER	unnamed protein product
[23]		66548684	10	25.7	4.92	1.4e-09	1356.37	678.69	2	677.901	0.79	AGLSIPVGIALDTK	59.387	1.4e-09	55815.1	APIS MELLIFERA	PREDICTED: similar to Pyruvate kinase CG7070-PB, isoform B
[23]		66548684	10	25.7	4.92	1.4e-09	1690.17	845.59	2	844.923	0.67	GTSSIVYVDYENITK	54.619	3.2e-08	55815.1	APIS MELLIFERA	PREDICTED: similar to Pyruvate kinase CG7070-PB, isoform B
[23]		66548684	10	25.7	4.92	1.4e-09	2569.71	857.24	3	856.765	0.48	DKSDLIFGVEHEVDMIFASFIR	86.654	1.7e-05	55815.1	APIS MELLIFERA	PREDICTED: similar to Pyruvate kinase CG7070-PB, isoform B
[23]		66548684	10	25.7	4.92	1.4e-09	1107.35	554.18	2	553.808	0.37	FVDDGLISLK	53.606	2e-05	55815.1	APIS MELLIFERA	PREDICTED: similar to Pyruvate kinase CG7070-PB, isoform B
[23]		66548684	10	25.7	4.92	1.4e-09	2609.61	870.54	3	870.106	0.43	IENHQGVVNIDEIIDASDGIMVAR	66.83	5e-05	55815.1	APIS MELLIFERA	PREDICTED: similar to Pyruvate kinase CG7070-PB, isoform B
[23]		66548684	10	25.7	4.92	1.4e-09	1168.21	584.61	2	584.316	0.29	GDLGIEIPPEK	49.043	5.1e-05	55815.1	APIS MELLIFERA	PREDICTED: similar to Pyruvate kinase CG7070-PB, isoform B
[23]		66548684	10	25.7	4.92	1.4e-09	1138.13	569.57	2	569.273	0.3	M(Oxidation)IDTGMNIAR	40.071	0.00076	55815.1	APIS MELLIFERA	PREDICTED: similar to Pyruvate kinase CG7070-PB, isoform B
[23]		66548684	10	25.7	4.92	1.4e-09	1122.13	561.57	2	561.276	0.29	MIDTGMNIAR	45.432	0.00095	55815.1	APIS MELLIFERA	PREDICTED: similar to Pyruvate kinase CG7070-PB, isoform B
[23]		66548684	10	25.7	4.92	1.4e-09	1206.49	603.75	2	603.342	0.41	VFVDDGLISLK	56.437	0.043	55815.1	APIS MELLIFERA	PREDICTED: similar to Pyruvate kinase CG7070-PB, isoform B
[23]		66548684	10	25.7	4.92	1.4e-09	3024.54	756.89	4	756.376	0.51	LTMANICKEAESAIWQTQLFHELSMK	86.491	0.049	55815.1	APIS MELLIFERA	PREDICTED: similar to Pyruvate kinase CG7070-PB, isoform B
[24]		110749675	9	39.6	4.75	2.6e-08	1486.23	743.62	2	743.386	0.23	ALQNAESEVAALNR	48.748	2.6e-08	32982.3	APIS MELLIFERA	PREDICTED: similar to Tropomyosin 1 CG4898-PD, isoform D
[24]		110749675	9	39.6	4.75	2.6e-08	1376.25	688.63	2	688.818	-0.19	LAEASQAADESER	16.754	2.1e-06	32982.3	APIS MELLIFERA	PREDICTED: similar to Tropomyosin 1 CG4898-PD, isoform D
[24]		110749675	9	39.6	4.75	2.6e-08	2190.93	730.98	3	730.367	0.61	TNMEDDRVSLLEQQLAQAK	56.161	9.6e-05	32982.3	APIS MELLIFERA	PREDICTED: similar to Tropomyosin 1 CG4898-PD, isoform D
[24]		110749675	9	39.6	4.75	2.6e-08	1764.99	589	3	588.644	0.36	LIAEEADKKYEEVAR	44.373	0.00011	32982.3	APIS MELLIFERA	PREDICTED: similar to Tropomyosin 1 CG4898-PD, isoform D
[24]		110749675	9	39.6	4.75	2.6e-08	1259.25	630.13	2	629.338	0.79	IQLLEEDLER	52.324	0.00011	32982.3	APIS MELLIFERA	PREDICTED: similar to Tropomyosin 1 CG4898-PD, isoform D
[24]		110749675	9	39.6	4.75	2.6e-08	2228.85	743.62	3	743.389	0.23	LEEKDKALQNAESEVAALNR	48.748	0.0046	32982.3	APIS MELLIFERA	PREDICTED: similar to Tropomyosin 1 CG4898-PD, isoform D
[24]		110749675	9	39.6	4.75	2.6e-08	1129.49	565.25	2	565.309	-0.059	IVELEEELR	49.72	0.006	32982.3	APIS MELLIFERA	PREDICTED: similar to Tropomyosin 1 CG4898-PD, isoform D
[24]		110749675	9	39.6	4.75	2.6e-08	2545.47	849.16	3	848.771	0.39	KIQTIENELDQTQEALMQVNAK	62.536	0.019	32982.3	APIS MELLIFERA	PREDICTED: similar to Tropomyosin 1 CG4898-PD, isoform D
[24]		110749675	9	39.6	4.75	2.6e-08	1916.28	639.43	3	639.001	0.43	RIQLLEEDLERSEER	49.409	0.024	32982.3	APIS MELLIFERA	PREDICTED: similar to Tropomyosin 1 CG4898-PD, isoform D
[25]		66521738	7	18.6	5.78	9.8e-10	1440.29	720.65	2	720.391	0.26	SGQVVPGYGHAVLR	43.896	9.8e-10	51930.5	APIS MELLIFERA	PREDICTED: similar to lethal (1) G0030 CG3861-PA, isoform A
[25]		66521738	7	18.6	5.78	9.8e-10	1712.53	856.77	2	856.422	0.35	MLGYEDPQFTELLR	62.912	5.2e-09	51930.5	APIS MELLIFERA	PREDICTED: similar to lethal (1) G0030 CG3861-PA, isoform A
[25]		66521738	7	18.6	5.78	9.8e-10	1811.37	906.19	2	905.473	0.72	GLLWEPSVLDPEEGIR	64.309	2.2e-07	51930.5	APIS MELLIFERA	PREDICTED: similar to lethal (1) G0030 CG3861-PA, isoform A
[25]		66521738	7	18.6	5.78	9.8e-10	1113.77	557.39	2	557.324	0.066	GLGFPIERPK	47.181	0.00038	51930.5	APIS MELLIFERA	PREDICTED: similar to lethal (1) G0030 CG3861-PA, isoform A
[25]		66521738	7	18.6	5.78	9.8e-10	1319.83	660.42	2	660.406	0.014	EKIPKHLEVVK	8.566	0.012	51930.5	APIS MELLIFERA	PREDICTED: similar to lethal (1) G0030 CG3861-PA, isoform A
[25]		66521738	7	18.6	5.78	9.8e-10	1181.27	591.14	2	590.85	0.29	VVPPILQETGK	47.784	0.036	51930.5	APIS MELLIFERA	PREDICTED: similar to lethal (1) G0030 CG3861-PA, isoform A
[25]		66521738	7	18.6	5.78	9.8e-10	1103.79	552.4	2	551.835	0.57	LPSVAAIIYR	56.283	0.044	51930.5	APIS MELLIFERA	PREDICTED: similar to lethal (1) G0030 CG3861-PA, isoform A
[26]		125981509	8	15.1	4.49	2.9e-08	1527.17	764.09	2	763.878	0.21	ITPSYVAFTADGER	49.705	2.9e-08	72306.5	DROSOPHILA PSEUDOOBSCURA PSEUDOOBSCURA	GA17988
[26]		125981509	8	15.1	4.49	2.9e-08	1490.63	745.82	2	745.9	-0.08	VFAPEEISAMVLGK	65.22	5.5e-08	72306.5	DROSOPHILA PSEUDOOBSCURA PSEUDOOBSCURA	GA17988
[26]		125981509	8	15.1	4.49	2.9e-08	1691.67	846.34	2	846.415	-0.075	NQLTTNPENTVFDAK	48.927	9.5e-08	72306.5	DROSOPHILA PSEUDOOBSCURA PSEUDOOBSCURA	GA17988
[26]		125981509	8	15.1	4.49	2.9e-08	1184.41	592.71	2	592.327	0.38	FDLTGIPPAPR	52.144	1.6e-07	72306.5	DROSOPHILA PSEUDOOBSCURA PSEUDOOBSCURA	GA17988
[26]		125981509	8	15.1	4.49	2.9e-08	1318.23	659.62	2	658.822	0.8	NELESYAYSLK	51.576	1.8e-06	72306.5	DROSOPHILA PSEUDOOBSCURA PSEUDOOBSCURA	GA17988
[26]		125981509	8	15.1	4.49	2.9e-08	1240.47	620.74	2	620.816	-0.076	MKETAEAYLGK	18.242	0.00097	72306.5	DROSOPHILA PSEUDOOBSCURA PSEUDOOBSCURA	GA17988
[26]		125981509	8	15.1	4.49	2.9e-08	1318.55	659.78	2	660.346	-0.57	EPTAAAIAYGLDK	23.007	0.014	72306.5	DROSOPHILA PSEUDOOBSCURA PSEUDOOBSCURA	GA17988
[26]		125981509	8	15.1	4.49	2.9e-08	1178.17	589.59	2	589.79	-0.2	VLEDADM(Oxidation)NKK	15.21	0.023	72306.5	DROSOPHILA PSEUDOOBSCURA PSEUDOOBSCURA	GA17988
[27]		94158718	6	48.9	5.6	1.6e-09	1815.57	908.29	2	908.418	-0.13	FNAYDDGGNFNEVVVR	52.25	1.6e-09	15203.8	APIS MELLIFERA	odorant binding protein 21
[27]		94158718	6	48.9	5.6	1.6e-09	1944.49	972.75	2	972.466	0.28	KFNAYDDGGNFNEVVVR	50.002	9.9e-09	15203.8	APIS MELLIFERA	odorant binding protein 21
[27]		94158718	6	48.9	5.6	1.6e-09	1131.13	566.07	2	565.788	0.28	NGIIDVENEK	29.053	1.1e-06	15203.8	APIS MELLIFERA	odorant binding protein 21
[27]		94158718	6	48.9	5.6	1.6e-09	1679.21	840.11	2	839.912	0.2	EIAEIYLDENEVNK	51.5	4e-06	15203.8	APIS MELLIFERA	odorant binding protein 21
[27]		94158718	6	48.9	5.6	1.6e-09	1285.19	643.1	2	642.88	0.22	LTLEELQIGLR	84.423	2.9e-05	15203.8	APIS MELLIFERA	odorant binding protein 21
[27]		94158718	6	48.9	5.6	1.6e-09	1668.39	556.8	3	556.269	0.53	IDSGIDEKKEDDFR	17.925	0.00068	15203.8	APIS MELLIFERA	odorant binding protein 21
[28]		48097086	8	36.8	4.34	4.8e-08	1534.19	767.6	2	767.373	0.23	AVTETGVELSNEER	32.892	4.8e-08	28076.7	APIS MELLIFERA	PREDICTED: similar to 14-3-3-like protein (Leonardo protein) (14-3-3 zeta) isoform 1
[28]		48097086	8	36.8	4.34	4.8e-08	1376.19	688.6	2	688.348	0.25	Acetyl-MSVDKEELVQR	47.006	5.7e-07	28076.7	APIS MELLIFERA	PREDICTED: similar to 14-3-3-like protein (Leonardo protein) (14-3-3 zeta) isoform 1
[28]		48097086	8	36.8	4.34	4.8e-08	1210.27	605.64	2	605.309	0.33	YLAEVATGETR	19.213	3.8e-06	28076.7	APIS MELLIFERA	PREDICTED: similar to 14-3-3-like protein (Leonardo protein) (14-3-3 zeta) isoform 1
[28]		48097086	8	36.8	4.34	4.8e-08	3329.31	1110.44	3	1110.21	0.23	QAFDDAIAELDTLNEDSYKDSTLIMQLLR	82.046	1.7e-05	28076.7	APIS MELLIFERA	PREDICTED: similar to 14-3-3-like protein (Leonardo protein) (14-3-3 zeta) isoform 1
[28]		48097086	8	36.8	4.34	4.8e-08	1244.69	622.85	2	622.828	0.022	M(Met-loss+Acetyl)SVDKEELVQR	18.641	3e-05	28076.7	APIS MELLIFERA	PREDICTED: similar to 14-3-3-like protein (Leonardo protein) (14-3-3 zeta) isoform 1
[28]		48097086	8	36.8	4.34	4.8e-08	1814.76	605.59	3	604.947	0.64	LAEQAERYDDMAAAMK	47.844	8.2e-05	28076.7	APIS MELLIFERA	PREDICTED: similar to 14-3-3-like protein (Leonardo protein) (14-3-3 zeta) isoform 1
[28]		48097086	8	36.8	4.34	4.8e-08	1242.29	621.65	2	621.306	0.34	YYEILNSPDK	46.153	0.0049	28076.7	APIS MELLIFERA	PREDICTED: similar to 14-3-3-like protein (Leonardo protein) (14-3-3 zeta) isoform 1
[28]		48097086	8	36.8	4.34	4.8e-08	1189.75	595.38	2	595.334	0.046	DSTLIMQLLR	64.577	0.0096	28076.7	APIS MELLIFERA	PREDICTED: similar to 14-3-3-like protein (Leonardo protein) (14-3-3 zeta) isoform 1
[29]		48142692	6	31.2	5.13	4.1e-09	1690.31	845.66	2	844.923	0.74	AGAEYIVESTGVYTTK	50.603	4.1e-09	35883.5	APIS MELLIFERA	PREDICTED: similar to Glyceraldehyde-3-phosphate dehydrogenase 2 (Glyceraldehyde-3-phosphate dehydrogenase II) (GAPDH II) isoform 1
[29]		48142692	6	31.2	5.13	4.1e-09	2654.22	885.41	3	885.127	0.28	VIHDNFEIVEGLMTTVHAVTATQK	70.95	2.5e-08	35883.5	APIS MELLIFERA	PREDICTED: similar to Glyceraldehyde-3-phosphate dehydrogenase 2 (Glyceraldehyde-3-phosphate dehydrogenase II) (GAPDH II) isoform 1
[29]		48142692	6	31.2	5.13	4.1e-09	1534.45	767.73	2	767.441	0.29	VPVHNVSVVDLTVR	49.925	2.6e-07	35883.5	APIS MELLIFERA	PREDICTED: similar to Glyceraldehyde-3-phosphate dehydrogenase 2 (Glyceraldehyde-3-phosphate dehydrogenase II) (GAPDH II) isoform 1
[29]		48142692	6	31.2	5.13	4.1e-09	1343.23	672.12	2	671.852	0.27	IENDQLVVNGNK	18.13	1.4e-06	35883.5	APIS MELLIFERA	PREDICTED: similar to Glyceraldehyde-3-phosphate dehydrogenase 2 (Glyceraldehyde-3-phosphate dehydrogenase II) (GAPDH II) isoform 1
[29]		48142692	6	31.2	5.13	4.1e-09	2901.09	967.7	3	967.454	0.25	GILGYTEDEVVSSDFIGDDHASIFDAK	66.505	3.9e-06	35883.5	APIS MELLIFERA	PREDICTED: similar to Glyceraldehyde-3-phosphate dehydrogenase 2 (Glyceraldehyde-3-phosphate dehydrogenase II) (GAPDH II) isoform 1
[29]		48142692	6	31.2	5.13	4.1e-09	1160.87	580.94	2	580.825	0.12	AGIALNNNFVK	48.722	1.5e-05	35883.5	APIS MELLIFERA	PREDICTED: similar to Glyceraldehyde-3-phosphate dehydrogenase 2 (Glyceraldehyde-3-phosphate dehydrogenase II) (GAPDH II) isoform 1
[30]		110755329	8	22.2	5	4e-09	2044.45	1022.73	2	1022.5	0.23	AQQPAAVEQPALSSEESSSK	39.117	4e-09	52003.4	APIS MELLIFERA	PREDICTED: hypothetical protein
[30]		110755329	8	22.2	5	4e-09	1523.33	762.17	2	761.909	0.26	ENQEPLQVVPLEK	50.463	4.7e-06	52003.4	APIS MELLIFERA	PREDICTED: hypothetical protein
[30]		110755329	8	22.2	5	4e-09	1372.21	686.61	2	686.341	0.27	AAEENKPAVEGEK	15.412	0.0002	52003.4	APIS MELLIFERA	PREDICTED: hypothetical protein
[30]		110755329	8	22.2	5	4e-09	1466.29	733.65	2	733.884	-0.23	KPEQPAVQQDQAK	16.104	0.00061	52003.4	APIS MELLIFERA	PREDICTED: hypothetical protein
[30]		110755329	8	22.2	5	4e-09	1144.53	572.77	2	572.802	-0.031	SAAEAEKPSVR	15.873	0.0033	52003.4	APIS MELLIFERA	PREDICTED: hypothetical protein
[30]		110755329	8	22.2	5	4e-09	2114.85	705.62	3	705.359	0.26	ALEEKKEEAQQEAKPEEK	16.65	0.0097	52003.4	APIS MELLIFERA	PREDICTED: hypothetical protein
[30]		110755329	8	22.2	5	4e-09	1108.53	554.77	2	554.262	0.51	SSEQVDSVEK	15.473	0.025	52003.4	APIS MELLIFERA	PREDICTED: hypothetical protein
[30]		110755329	8	22.2	5	4e-09	1155.71	578.36	2	578.298	0.062	AGDESKPELLP	44.75	0.042	52003.4	APIS MELLIFERA	PREDICTED: hypothetical protein
[31]		110763826	6	17.6	5.5	4.6e-10	2043.41	1022.21	2	1021.5	0.71	TIVWNGPAGVFEFENFSK	67.284	4.6e-10	44992.3	APIS MELLIFERA	PREDICTED: similar to Phosphoglycerate kinase isoform 1
[31]		110763826	6	17.6	5.5	4.6e-10	1294.23	647.62	2	647.321	0.3	SLMDNVVEATSK	51.487	8.6e-08	44992.3	APIS MELLIFERA	PREDICTED: similar to Phosphoglycerate kinase isoform 1
[31]		110763826	6	17.6	5.5	4.6e-10	1280.25	640.63	2	640.312	0.32	IGNSLFDEEGAK	46.166	1.6e-06	44992.3	APIS MELLIFERA	PREDICTED: similar to Phosphoglycerate kinase isoform 1
[31]		110763826	6	17.6	5.5	4.6e-10	1797.6	599.87	3	599.34	0.53	ALENPERPFLAILGGAK	61.93	1.1e-05	44992.3	APIS MELLIFERA	PREDICTED: similar to Phosphoglycerate kinase isoform 1
[31]		110763826	6	17.6	5.5	4.6e-10	1277.13	639.07	2	638.861	0.21	YTIKPVADELK	46.289	0.00031	44992.3	APIS MELLIFERA	PREDICTED: similar to Phosphoglycerate kinase isoform 1
[31]		110763826	6	17.6	5.5	4.6e-10	1940.85	647.62	3	648.003	-0.38	FSKGTKSLMDNVVEATSK	51.487	0.01	44992.3	APIS MELLIFERA	PREDICTED: similar to Phosphoglycerate kinase isoform 1
[32]		110765081	10	24.6	3.33	1.2e-06	1468.01	734.51	2	734.424	0.086	ILNANLITPEEIK	54.792	1.2e-06	44573.9	APIS MELLIFERA	PREDICTED: similar to lethal (1) G0334 CG7010-PC, isoform C isoform 1
[32]		110765081	10	24.6	3.33	1.2e-06	1384.25	692.63	2	692.349	0.28	ATEASFETKPFR	41.804	1.3e-05	44573.9	APIS MELLIFERA	PREDICTED: similar to lethal (1) G0334 CG7010-PC, isoform C isoform 1
[32]		110765081	10	24.6	3.33	1.2e-06	1407.23	704.12	2	703.881	0.24	NITPFNPLPHTR	49.004	4.1e-05	44573.9	APIS MELLIFERA	PREDICTED: similar to lethal (1) G0334 CG7010-PC, isoform C isoform 1
[32]		110765081	10	24.6	3.33	1.2e-06	1160.27	580.64	2	580.307	0.33	TREEIQEVR	16.804	0.00074	44573.9	APIS MELLIFERA	PREDICTED: similar to lethal (1) G0334 CG7010-PC, isoform C isoform 1
[32]		110765081	10	24.6	3.33	1.2e-06	1949.55	975.28	2	974.498	0.78	GDYIPGIWVDGMDVLAVK	70.553	0.0013	44573.9	APIS MELLIFERA	PREDICTED: similar to lethal (1) G0334 CG7010-PC, isoform C isoform 1
[32]		110765081	10	24.6	3.33	1.2e-06	1162.55	581.78	2	581.814	-0.034	QTRDPITGFK	18.325	0.0023	44573.9	APIS MELLIFERA	PREDICTED: similar to lethal (1) G0334 CG7010-PC, isoform C isoform 1
[32]		110765081	10	24.6	3.33	1.2e-06	2453.7	614.18	4	613.601	0.58	ILNANLITPEEIKTIENEIRK	65.377	0.012	44573.9	APIS MELLIFERA	PREDICTED: similar to lethal (1) G0334 CG7010-PC, isoform C isoform 1
[32]		110765081	10	24.6	3.33	1.2e-06	1108.53	554.77	2	554.798	-0.028	DEAIELYKK	18.546	0.016	44573.9	APIS MELLIFERA	PREDICTED: similar to lethal (1) G0334 CG7010-PC, isoform C isoform 1
[32]		110765081	10	24.6	3.33	1.2e-06	1150.11	575.56	2	575.306	0.25	NITPFNPLPH	52.934	0.02	44573.9	APIS MELLIFERA	PREDICTED: similar to lethal (1) G0334 CG7010-PC, isoform C isoform 1
[32]		110765081	10	24.6	3.33	1.2e-06	2922.48	974.83	3	974.472	0.36	ASTDYYTRGDYIPGIW(Oxidation)VDGMDVLAVK	65.342	0.041	44573.9	APIS MELLIFERA	PREDICTED: similar to lethal (1) G0334 CG7010-PC, isoform C isoform 1
[33]		62198227	6	17.2	3.99	4.6e-07	1508.23	754.62	2	754.386	0.23	YDGVPSSLNVISEK	52.263	4.6e-07	50541.4	APIS MELLIFERA	major royal jelly protein 7
[33]		62198227	6	17.2	3.99	4.6e-07	1534.45	767.73	2	767.39	0.34	LLQPYPDWSWTK	59.051	6.4e-07	50541.4	APIS MELLIFERA	major royal jelly protein 7
[33]		62198227	6	17.2	3.99	4.6e-07	1722.41	861.71	2	861.434	0.28	ILNNDLNFNDINFR	60.456	6.6e-07	50541.4	APIS MELLIFERA	major royal jelly protein 7
[33]		62198227	6	17.2	3.99	4.6e-07	1499.89	750.45	2	750.425	0.025	ILIGGVSDLLENTR	61.145	8.9e-07	50541.4	APIS MELLIFERA	major royal jelly protein 7
[33]		62198227	6	17.2	3.99	4.6e-07	1264.31	632.66	2	632.351	0.31	VFDLNSSQLIK	54.265	0.00024	50541.4	APIS MELLIFERA	major royal jelly protein 7
[33]		62198227	6	17.2	3.99	4.6e-07	1327.55	664.28	2	664.317	-0.037	LTSNTFNYDPR	44.633	0.0031	50541.4	APIS MELLIFERA	major royal jelly protein 7
[1-2, 33-1]	2	110761428	3	8.4	3.32	4.6e-07	1508.23	754.62	2	754.386	0.23	YDGVPSSLNVISEK	52.263	4.6e-07	33707.4	APIS MELLIFERA	PREDICTED: similar to yellow-h CG1629-PA
[1-2, 33-1]	2	110761428	3	8.4	3.32	4.6e-07	1188.07	594.54	2	594.264	0.28	TSNTFDYDPK	18.36	1.8e-06	33707.4	APIS MELLIFERA	PREDICTED: similar to yellow-h CG1629-PA
[1-2, 33-1]	2	110761428	3	8.4	3.32	4.6e-07	1300.79	650.9	2	650.806	0.094	LTSNTFDYDPK	44.044	2.5e-06	33707.4	APIS MELLIFERA	PREDICTED: similar to yellow-h CG1629-PA
[34]		110759783	7	4.6	4.23	6.1e-08	1997.77	999.39	2	999.03	0.36	IDQIHTIWEQLTQMLK	77.164	6.1e-08	268739	APIS MELLIFERA	PREDICTED: similar to Spectrin beta chain
[34]		110759783	7	4.6	4.23	6.1e-08	1334.25	667.63	2	667.343	0.29	GKDEISAQNLMK	41.627	1.4e-06	268739	APIS MELLIFERA	PREDICTED: similar to Spectrin beta chain
[34]		110759783	7	4.6	4.23	6.1e-08	1202.05	601.53	2	601.296	0.23	LVDEGHFAADK	17.709	5.8e-06	268739	APIS MELLIFERA	PREDICTED: similar to Spectrin beta chain
[34]		110759783	7	4.6	4.23	6.1e-08	2874.82	719.46	4	718.909	0.55	LQQLQQAAEELIQQKPDLAEIIKPK	66.926	0.00077	268739	APIS MELLIFERA	PREDICTED: similar to Spectrin beta chain
[34]		110759783	7	4.6	4.23	6.1e-08	1789.74	597.25	3	596.992	0.26	QLINDQHPLGDQIAVK	49.192	0.019	268739	APIS MELLIFERA	PREDICTED: similar to Spectrin beta chain
[34]		110759783	7	4.6	4.23	6.1e-08	1233.89	617.45	2	617.271	0.18	EQEREEEER	3.627	0.027	268739	APIS MELLIFERA	PREDICTED: similar to Spectrin beta chain
[34]		110759783	7	4.6	4.23	6.1e-08	2093.4	698.47	3	698.017	0.45	MLETMVPAKDIEDVEIMK	60.226	0.046	268739	APIS MELLIFERA	PREDICTED: similar to Spectrin beta chain
[35]		66530257	5	10.4	4.92	1.4e-08	1618.39	809.7	2	809.413	0.29	LNINPVQSSSTASSGR	43.181	1.4e-08	67253.8	APIS MELLIFERA	PREDICTED: similar to Lamin CG6944-PA, partial
[35]		66530257	5	10.4	4.92	1.4e-08	1317.17	659.09	2	658.844	0.25	NSGAASLAVEELR	48.589	4.4e-08	67253.8	APIS MELLIFERA	PREDICTED: similar to Lamin CG6944-PA, partial
[35]		66530257	5	10.4	4.92	1.4e-08	1499.35	750.18	2	750.394	-0.21	INELEAANNALTAR	51.095	5.2e-07	67253.8	APIS MELLIFERA	PREDICTED: similar to Lamin CG6944-PA, partial
[35]		66530257	5	10.4	4.92	1.4e-08	1115.33	558.17	2	557.814	0.36	LQQSLQELR	35.574	0.00022	67253.8	APIS MELLIFERA	PREDICTED: similar to Lamin CG6944-PA, partial
[35]		66530257	5	10.4	4.92	1.4e-08	1160.55	580.78	2	580.783	-0.0028	LWDNNEELK	42.613	0.014	67253.8	APIS MELLIFERA	PREDICTED: similar to Lamin CG6944-PA, partial
[36]		66508906	5	22.4	4.86	1.1e-08	2203.08	735.03	3	734.691	0.34	TKPDVAEVDTPDILSADEMR	54.415	1.1e-08	27140.7	APIS MELLIFERA	PREDICTED: similar to CG10527-PA
[36]		66508906	5	22.4	4.86	1.1e-08	1479.23	740.12	2	739.841	0.28	GGETEDGEPLYVGR	40.114	3.6e-08	27140.7	APIS MELLIFERA	PREDICTED: similar to CG10527-PA
[36]		66508906	5	22.4	4.86	1.1e-08	1168.57	584.79	2	584.82	-0.03	VQHEGSLTIGK	17.249	6.8e-07	27140.7	APIS MELLIFERA	PREDICTED: similar to CG10527-PA
[36]		66508906	5	22.4	4.86	1.1e-08	1421.81	711.41	2	711.331	0.079	GETEDGEPLYVGR	39.247	0.00022	27140.7	APIS MELLIFERA	PREDICTED: similar to CG10527-PA
[36]		66508906	5	22.4	4.86	1.1e-08	1236.43	618.72	2	618.796	-0.076	DIDGNDLYVGR	46.051	0.0011	27140.7	APIS MELLIFERA	PREDICTED: similar to CG10527-PA
[37]		48096138	6	22.9	3.73	3e-07	1591.35	796.18	2	795.928	0.25	DNLTAILYGINDIR	66.715	3e-07	37972.7	APIS MELLIFERA	PREDICTED: similar to Sorbitol dehydrogenase-2 CG4649-PA
[37]		48096138	6	22.9	3.73	3e-07	1733.43	867.22	2	867.069	0.15	VLILGAGPIGLVSLLVAK	79.637	3.8e-07	37972.7	APIS MELLIFERA	PREDICTED: similar to Sorbitol dehydrogenase-2 CG4649-PA
[37]		48096138	6	22.9	3.73	3e-07	1368.29	684.65	2	684.338	0.31	LEDTVQAFETSK	46.749	6e-07	37972.7	APIS MELLIFERA	PREDICTED: similar to Sorbitol dehydrogenase-2 CG4649-PA
[37]		48096138	6	22.9	3.73	3e-07	1176.33	588.67	2	588.326	0.34	IVITDLMQSR	53.862	4.6e-06	37972.7	APIS MELLIFERA	PREDICTED: similar to Sorbitol dehydrogenase-2 CG4649-PA
[37]		48096138	6	22.9	3.73	3e-07	1255.63	628.32	2	627.796	0.52	EDTVQAFETSK	23.623	0.00032	37972.7	APIS MELLIFERA	PREDICTED: similar to Sorbitol dehydrogenase-2 CG4649-PA
[37]		48096138	6	22.9	3.73	3e-07	2771.7	693.68	4	693.1	0.58	FGEEPDKTIDACGAESSIRLAIFATK	31.778	0.037	37972.7	APIS MELLIFERA	PREDICTED: similar to Sorbitol dehydrogenase-2 CG4649-PA
[38]		58585106	6	55.4	4.43	1.4e-08	1903.93	952.47	2	952.002	0.47	FLVENKPELWDSLANK	57.384	1.4e-08	14954.6	APIS MELLIFERA	chemosensory protein 3 precursor
[38]		58585106	6	55.4	4.43	1.4e-08	1687.41	844.21	2	843.908	0.3	FDNINVDEILHSDR	57.097	9.1e-07	14954.6	APIS MELLIFERA	chemosensory protein 3 precursor
[38]		58585106	6	55.4	4.43	1.4e-08	2498.55	833.52	3	833.054	0.47	DESYTSKFDNINVDEILHSDR	60.134	3.3e-06	14954.6	APIS MELLIFERA	chemosensory protein 3 precursor
[38]		58585106	6	55.4	4.43	1.4e-08	2650.02	663.26	4	663.094	0.17	FLVENKPELWDSLANKYDPDKK	57.461	0.0046	14954.6	APIS MELLIFERA	chemosensory protein 3 precursor
[38]		58585106	6	55.4	4.43	1.4e-08	1107.83	554.42	2	554.306	0.11	VKFEEEAKK	14.543	0.0066	14954.6	APIS MELLIFERA	chemosensory protein 3 precursor
[38]		58585106	6	55.4	4.43	1.4e-08	1998.03	666.68	3	667.077	-0.4	M(Met-loss)KVSIICLVLM(Oxidation)AAIVLVAAR	110.389	0.011	14954.6	APIS MELLIFERA	chemosensory protein 3 precursor
[39]		283436152	6	33.6	3.64	2.3e-06	2189.37	730.46	3	730.032	0.43	LDMIDEISKDDPEQALTVR	60.9	2.3e-06	25133.9	APIS MELLIFERA	peroxiredoxin-like protein
[39]		283436152	6	33.6	3.64	2.3e-06	1130.51	565.76	2	565.327	0.43	VIDSLQLVDK	48.88	7.3e-06	25133.9	APIS MELLIFERA	peroxiredoxin-like protein
[39]		283436152	6	33.6	3.64	2.3e-06	2776.44	926.15	3	925.84	0.31	VIDSLQLVDKRPEIATPANWVPGEK	59.139	5.5e-05	25133.9	APIS MELLIFERA	peroxiredoxin-like protein
[39]		283436152	6	33.6	3.64	2.3e-06	1666.32	556.11	3	555.63	0.48	RPEIATPANWVPGEK	49.239	0.00039	25133.9	APIS MELLIFERA	peroxiredoxin-like protein
[39]		283436152	6	33.6	3.64	2.3e-06	1185.33	593.17	2	592.825	0.35	ALYIISPDHR	44.323	0.00096	25133.9	APIS MELLIFERA	peroxiredoxin-like protein
[39]		283436152	6	33.6	3.64	2.3e-06	2347.26	587.57	4	587.062	0.51	LLAHSVDKLQDHVDWVNDIK	54.125	0.0023	25133.9	APIS MELLIFERA	peroxiredoxin-like protein
[40]		66530423	6	12.4	4.74	4.7e-09	1308.51	654.76	2	654.867	-0.11	TGAALVAHNLVDK	43.061	4.7e-09	55686	APIS MELLIFERA	PREDICTED: similar to Aldehyde dehydrogenase CG3752-PA isoform 1
[40]		66530423	6	12.4	4.74	4.7e-09	1110.21	555.61	2	555.295	0.31	IAFTGSTEVGK	38.914	1.2e-05	55686	APIS MELLIFERA	PREDICTED: similar to Aldehyde dehydrogenase CG3752-PA isoform 1
[40]		66530423	6	12.4	4.74	4.7e-09	1166.15	583.58	2	583.314	0.27	FSSLNEVITR	48.807	0.00031	55686	APIS MELLIFERA	PREDICTED: similar to Aldehyde dehydrogenase CG3752-PA isoform 1
[40]		66530423	6	12.4	4.74	4.7e-09	1401.55	701.28	2	700.893	0.39	EEIFGPVQQILK	61.158	0.0088	55686	APIS MELLIFERA	PREDICTED: similar to Aldehyde dehydrogenase CG3752-PA isoform 1
[40]		66530423	6	12.4	4.74	4.7e-09	1702.51	851.76	2	852.432	-0.67	IESGKNEGAELVSGGTR	111.661	0.023	55686	APIS MELLIFERA	PREDICTED: similar to Aldehyde dehydrogenase CG3752-PA isoform 1
[40]		66530423	6	12.4	4.74	4.7e-09	1190.29	595.65	2	595.294	0.36	NEGAELVSGGTR	17.821	0.025	55686	APIS MELLIFERA	PREDICTED: similar to Aldehyde dehydrogenase CG3752-PA isoform 1
[41]		66505007	4	5.8	5.89	1.4e-09	1523.55	762.28	2	761.915	0.37	GHALDDLSAALQLAK	59.105	1.4e-09	91204.3	APIS MELLIFERA	PREDICTED: similar to Hsc70Cb CG6603-PA, isoform A isoform 1
[41]		66505007	4	5.8	5.89	1.4e-09	1338.19	669.6	2	669.38	0.22	TQQPPVTVAQIR	44.67	5e-08	91204.3	APIS MELLIFERA	PREDICTED: similar to Hsc70Cb CG6603-PA, isoform A isoform 1
[41]		66505007	4	5.8	5.89	1.4e-09	1665.21	555.74	3	555.35	0.39	LTLDSIVLPILNKPK	65.172	0.013	91204.3	APIS MELLIFERA	PREDICTED: similar to Hsc70Cb CG6603-PA, isoform A isoform 1
[41]		66505007	4	5.8	5.89	1.4e-09	1848.89	924.95	2	925.516	-0.57	ASTPRTQQPPVTVAQIR	74.397	0.021	91204.3	APIS MELLIFERA	PREDICTED: similar to Hsc70Cb CG6603-PA, isoform A isoform 1
[42]		66522386	6	30.6	3.83	1.6e-07	1458.53	729.77	2	729.881	-0.11	ALTNAESEVAALNR	49.077	1.6e-07	32157.3	APIS MELLIFERA	PREDICTED: similar to Tropomyosin 2 CG4843-PB, isoform B
[42]		66522386	6	30.6	3.83	1.6e-07	1335.23	668.12	2	667.813	0.31	LAEASQAADESSR	16.691	1.4e-06	32157.3	APIS MELLIFERA	PREDICTED: similar to Tropomyosin 2 CG4843-PB, isoform B
[42]		66522386	6	30.6	3.83	1.6e-07	1832.37	916.69	2	915.998	0.69	IMELEEELKVVGNSLK	64.951	8.3e-05	32157.3	APIS MELLIFERA	PREDICTED: similar to Tropomyosin 2 CG4843-PB, isoform B
[42]		66522386	6	30.6	3.83	1.6e-07	1801.86	601.29	3	600.974	0.32	EVDRLEDELGINKDR	48.426	0.00038	32157.3	APIS MELLIFERA	PREDICTED: similar to Tropomyosin 2 CG4843-PB, isoform B
[42]		66522386	6	30.6	3.83	1.6e-07	1991.76	664.59	3	664.021	0.57	KLAFVEDELEVAEDRVK	58.394	0.0012	32157.3	APIS MELLIFERA	PREDICTED: similar to Tropomyosin 2 CG4843-PB, isoform B
[42]		66522386	6	30.6	3.83	1.6e-07	1288.05	644.53	2	643.833	0.7	LAQVEGDLEANK	20.162	0.0079	32157.3	APIS MELLIFERA	PREDICTED: similar to Tropomyosin 2 CG4843-PB, isoform B
[43]		66550890	5	18.3	4.16	5.1e-08	1462.15	731.58	2	731.321	0.26	HLDEMSNDEIMK	40.599	5.1e-08	35361.1	APIS MELLIFERA	PREDICTED: similar to Phosphoglyceromutase CG1721-PA, isoform A
[43]		66550890	5	18.3	4.16	5.1e-08	1282.25	641.63	2	641.327	0.3	YYEIIVNDPR	48.439	4.3e-06	35361.1	APIS MELLIFERA	PREDICTED: similar to Phosphoglyceromutase CG1721-PA, isoform A
[43]		66550890	5	18.3	4.16	5.1e-08	1164.65	582.83	2	582.846	-0.016	IIIAAHGNSLR	18.385	8.7e-06	35361.1	APIS MELLIFERA	PREDICTED: similar to Phosphoglyceromutase CG1721-PA, isoform A
[43]		66550890	5	18.3	4.16	5.1e-08	1308.29	654.65	2	654.323	0.33	YGEEQVQIWR	48.983	5.8e-05	35361.1	APIS MELLIFERA	PREDICTED: similar to Phosphoglyceromutase CG1721-PA, isoform A
[43]		66550890	5	18.3	4.16	5.1e-08	1701.51	851.26	2	850.972	0.29	TLPYWNNTIIPQLK	63.479	0.00016	35361.1	APIS MELLIFERA	PREDICTED: similar to Phosphoglyceromutase CG1721-PA, isoform A
[44]		66510528	7	63.6	2.98	4.5e-06	1428.55	714.78	2	714.821	-0.041	EIDSDHDNQLSR	16.522	4.5e-06	17170.2	APIS MELLIFERA	PREDICTED: similar to Fkbp13 CG9847-PA, isoform A, partial
[44]		66510528	7	63.6	2.98	4.5e-06	1435.43	718.22	2	717.836	0.38	NGFISHDEFSGPK	44.415	5.7e-06	17170.2	APIS MELLIFERA	PREDICTED: similar to Fkbp13 CG9847-PA, isoform A, partial
[44]		66510528	7	63.6	2.98	4.5e-06	1816.83	606.28	3	605.936	0.34	NGFISHDEFSGPKHDE	42.092	0.00064	17170.2	APIS MELLIFERA	PREDICTED: similar to Fkbp13 CG9847-PA, isoform A, partial
[44]		66510528	7	63.6	2.98	4.5e-06	1630.45	815.73	2	815.41	0.32	LVEEIFQHEDKDK	44.88	0.00078	17170.2	APIS MELLIFERA	PREDICTED: similar to Fkbp13 CG9847-PA, isoform A, partial
[44]		66510528	7	63.6	2.98	4.5e-06	2442.42	611.36	4	610.801	0.56	IMADHDKLVEEIFQHEDKDK	52.621	0.0012	17170.2	APIS MELLIFERA	PREDICTED: similar to Fkbp13 CG9847-PA, isoform A, partial
[44]		66510528	7	63.6	2.98	4.5e-06	1922.22	641.41	3	641.311	0.099	QMIEAEKGSGGDSEEVKK	16.934	0.0012	17170.2	APIS MELLIFERA	PREDICTED: similar to Fkbp13 CG9847-PA, isoform A, partial
[44]		66510528	7	63.6	2.98	4.5e-06	3637.14	910.04	4	910.197	-0.16	Acetyl-LDRDQPFTFQLGVGQVIKGWDEGLVDM(Oxidation)CVGEK	101.565	0.03	17170.2	APIS MELLIFERA	PREDICTED: similar to Fkbp13 CG9847-PA, isoform A, partial
[45]		109115260	6	16.7	3.25	1.4e-06	1382.21	691.61	2	691.328	0.28	ALEESNYELEGK	40.053	1.4e-06	62101.3	MACACA MULATTA	PREDICTED: keratin, type I cytoskeletal 10-like isoform 2
[45]		109115260	6	16.7	3.25	1.4e-06	1235.31	618.16	2	617.843	0.32	LKYENEVALR	41.337	5.6e-05	62101.3	MACACA MULATTA	PREDICTED: keratin, type I cytoskeletal 10-like isoform 2
[45]		109115260	6	16.7	3.25	1.4e-06	3053.85	1018.62	3	1018.21	0.41	TIDDLKNQILNLTTDNANILLQIDNAR	75.018	0.00043	62101.3	MACACA MULATTA	PREDICTED: keratin, type I cytoskeletal 10-like isoform 2
[45]		109115260	6	16.7	3.25	1.4e-06	1494.07	747.54	2	747.371	0.17	SQYEQLAEQNRK	17.325	0.00047	62101.3	MACACA MULATTA	PREDICTED: keratin, type I cytoskeletal 10-like isoform 2
[45]		109115260	6	16.7	3.25	1.4e-06	1109.99	555.5	2	555.249	0.25	DAEAWFNEK	47.71	0.0026	62101.3	MACACA MULATTA	PREDICTED: keratin, type I cytoskeletal 10-like isoform 2
[45]		109115260	6	16.7	3.25	1.4e-06	2406.86	602.47	4	602.002	0.47	GGSSGGGHGGSSGGGGSSGGGFGGGSSGGGHK	4.123	0.029	62101.3	MACACA MULATTA	PREDICTED: keratin, type I cytoskeletal 10-like isoform 2
[46]		110748686	4	48.9	4.18	8.7e-08	1956.01	978.51	2	977.997	0.51	QIQEQWNIPDQDTIVK	54.892	8.7e-08	15777.1	APIS MELLIFERA	PREDICTED: hypothetical protein
[46]		110748686	4	48.9	4.18	8.7e-08	3540.03	1180.68	3	1180.28	0.4	KVAPTSTTNSQGTPDVQLSELISQAQANINNLAK	72.413	9.5e-07	15777.1	APIS MELLIFERA	PREDICTED: hypothetical protein
[46]		110748686	4	48.9	4.18	8.7e-08	1769.37	885.19	2	884.929	0.26	DQSANFVNNIQDYIK	60.734	7.3e-06	15777.1	APIS MELLIFERA	PREDICTED: hypothetical protein
[46]		110748686	4	48.9	4.18	8.7e-08	2653.56	885.19	3	885.133	0.057	DTIVKTVKDQSANFVNNIQDYIK	60.734	0.011	15777.1	APIS MELLIFERA	PREDICTED: hypothetical protein
[47]		5114221	4	48.6	3.91	1.7e-07	1472.27	736.64	2	736.375	0.26	FQTVTSIEGNTFK	50.966	1.7e-07	12024.4	APIS MELLIFERA	FABP-like protein
[47]		5114221	4	48.6	3.91	1.7e-07	1667.45	834.23	2	833.468	0.76	VLGDQNLVNTVLQPR	57.487	2.2e-07	12024.4	APIS MELLIFERA	FABP-like protein
[47]		5114221	4	48.6	3.91	1.7e-07	2455.98	819.33	3	818.783	0.55	VLGDQNLVNTVLQPRPSFELSK	61.74	4.4e-06	12024.4	APIS MELLIFERA	FABP-like protein
[47]		5114221	4	48.6	3.91	1.7e-07	1873.83	625.28	3	624.989	0.29	MNVPFEETLPSLPDRK	57.235	0.0033	12024.4	APIS MELLIFERA	FABP-like protein
[48]		112983481	3	11.6	5.34	2.6e-09	2009.27	1005.14	2	1004.45	0.69	TIGGGDDSFNTFFSETGAGK	58.863	2.6e-09	49905.9	BOMBYX MORI	tubulin alpha chain
[48]		112983481	3	11.6	5.34	2.6e-09	1458.83	729.92	2	729.438	0.48	LIGQIVSSITASLR	68.521	8.7e-07	49905.9	BOMBYX MORI	tubulin alpha chain
[48]		112983481	3	11.6	5.34	2.6e-09	1824.67	912.84	2	912.996	-0.16	VGINYQPPTVVPGGDLAK	54.215	0.00013	49905.9	BOMBYX MORI	tubulin alpha chain
[49]		94158729	3	30.9	5.09	2.2e-08	2247.47	1124.24	2	1124.02	0.22	QENLNLDDIDSLLEDESER	65.631	2.2e-08	17663.4	APIS MELLIFERA	odorant binding protein 3
[49]		94158729	3	30.9	5.09	2.2e-08	1465.61	733.31	2	733.371	-0.061	LALMNDNVFDVSK	57.88	1e-07	17663.4	APIS MELLIFERA	odorant binding protein 3
[49]		94158729	3	30.9	5.09	2.2e-08	1835.41	918.21	2	917.897	0.31	FDVYLNDTDMDMDLK	60.852	0.0034	17663.4	APIS MELLIFERA	odorant binding protein 3
[50]		94158830	3	31.1	5.59	1.3e-08	1591.47	796.24	2	795.904	0.34	EIAEIFLDENGVNK	55.842	1.3e-08	15000.5	APIS MELLIFERA	odorant binding protein 18
[50]		94158830	3	31.1	5.59	1.3e-08	1319.33	660.17	2	659.872	0.3	LTLEEFQIGLR	61.267	0.00011	15000.5	APIS MELLIFERA	odorant binding protein 18
[50]		94158830	3	31.1	5.59	1.3e-08	1945.71	649.24	3	648.646	0.59	KFNGYDDGGNFNEVVIR	50.979	0.015	15000.5	APIS MELLIFERA	odorant binding protein 18
[51]		66553147	3	38.1	4.48	1.2e-07	1629.17	815.09	2	814.436	0.65	M(Met-loss+Acetyl)ASQTQGIQQLLAAEK	58.545	1.2e-07	13811.8	APIS MELLIFERA	PREDICTED: similar to Vacuolar ATP synthase subunit G (V-ATPase G subunit) (Vacuolar proton pump G subunit) (V-ATPase 13 kDa subunit)
[51]		66553147	3	38.1	4.48	1.2e-07	1745.49	873.25	2	872.48	0.77	DSVVHTILELVYDIK	81.026	9.8e-07	13811.8	APIS MELLIFERA	PREDICTED: similar to Vacuolar ATP synthase subunit G (V-ATPase G subunit) (Vacuolar proton pump G subunit) (V-ATPase 13 kDa subunit)
[51]		66553147	3	38.1	4.48	1.2e-07	1677.24	559.75	3	559.276	0.47	IKTEEMNQTVSMHK	17.769	0.001	13811.8	APIS MELLIFERA	PREDICTED: similar to Vacuolar ATP synthase subunit G (V-ATPase G subunit) (Vacuolar proton pump G subunit) (V-ATPase 13 kDa subunit)
[52]		58585076	4	10.2	4.08	1.7e-08	1293.43	647.22	2	646.859	0.36	SLHYLHIAGPGK	42.341	1.7e-08	63898.6	APIS MELLIFERA	juvenile hormone esterase
[52]		58585076	4	10.2	4.08	1.7e-08	1286.41	643.71	2	643.361	0.35	IPAWIGELSATK	57.966	3.6e-07	63898.6	APIS MELLIFERA	juvenile hormone esterase
[52]		58585076	4	10.2	4.08	1.7e-08	1256.43	628.72	2	628.29	0.43	IQMDSSTNFGR	42.019	0.00088	63898.6	APIS MELLIFERA	juvenile hormone esterase
[52]		58585076	4	10.2	4.08	1.7e-08	2620.38	874.13	3	874.77	-0.64	SGIPM(Oxidation)GAKYLM(Oxidation)DSDVIFVTINYR	75.907	0.046	63898.6	APIS MELLIFERA	juvenile hormone esterase
[53]		5627	4	34	4.04	4.7e-08	1389.23	695.12	2	694.838	0.28	NSADTISSYFVGK	52.475	4.7e-08	18487.1	APIS MELLIFERA	phospholipase A-2
[53]		5627	4	34	4.04	4.7e-08	1194.09	597.55	2	597.802	-0.25	HGLTNTASHTR	7.189	5.4e-05	18487.1	APIS MELLIFERA	phospholipase A-2
[53]		5627	4	34	4.04	4.7e-08	1145.33	573.17	2	572.789	0.38	MYFNLIDTK	55.502	0.00032	18487.1	APIS MELLIFERA	phospholipase A-2
[53]		5627	4	34	4.04	4.7e-08	2616.3	872.77	3	873.415	-0.64	DRIGDNELEERIIYPGTLW(Dioxidation)CGH	55.301	0.049	18487.1	APIS MELLIFERA	phospholipase A-2
[54]		66560571	3	22.9	4.55	4e-09	1806.31	903.66	2	903.444	0.22	TPLHYAADYGQSEVVR	46.984	4e-09	13090.9	APIS MELLIFERA	PREDICTED: similar to CG31715-PA
[54]		66560571	3	22.9	4.55	4e-09	1275.23	638.12	2	637.812	0.31	NIDVNQMIDGR	50.214	1.5e-06	13090.9	APIS MELLIFERA	PREDICTED: similar to CG31715-PA
[54]		66560571	3	22.9	4.55	4e-09	1291.29	646.15	2	645.809	0.34	NIDVNQM(Oxidation)IDGR	39.777	0.0086	13090.9	APIS MELLIFERA	PREDICTED: similar to CG31715-PA
[55]		110756547	4	1.8	3.76	2.4e-07	1766.41	883.71	2	882.971	0.74	EMYFINEPIGIIGLR	67.926	2.4e-07	318248	APIS MELLIFERA	PREDICTED: similar to CG33519-PB isoform 1
[55]		110756547	4	1.8	3.76	2.4e-07	1189.19	595.1	2	594.796	0.3	ISNPLGEDSTR	22.382	0.00059	318248	APIS MELLIFERA	PREDICTED: similar to CG33519-PB isoform 1
[55]		110756547	4	1.8	3.76	2.4e-07	1276.11	638.56	2	638.333	0.23	DLQQLPTFDAK	51.376	0.0064	318248	APIS MELLIFERA	PREDICTED: similar to CG33519-PB isoform 1
[55]		110756547	4	1.8	3.76	2.4e-07	1291.97	646.49	2	646.356	0.13	LVDM(Oxidation)GSARLVSK	12.332	0.027	318248	APIS MELLIFERA	PREDICTED: similar to CG33519-PB isoform 1
[56]		297591983	4	46.8	3.38	3.6e-06	1188.27	594.64	2	594.335	0.3	ELITNIGSGVGK	47.241	3.6e-06	11623.2	APIS MELLIFERA	60S acidic ribosomal protein P1
[56]		297591983	4	46.8	3.38	3.6e-06	2108.73	703.58	3	703.027	0.55	APAAAPAAAAPASTESAPAKEEK	17.474	7.4e-05	11623.2	APIS MELLIFERA	60S acidic ribosomal protein P1
[56]		297591983	4	46.8	3.38	3.6e-06	2204.07	735.36	3	736.054	-0.69	GSGVGKAPAAAPAAAAPASTESAPAK	30.997	0.012	11623.2	APIS MELLIFERA	60S acidic ribosomal protein P1
[56]		297591983	4	46.8	3.38	3.6e-06	3091.65	1031.22	3	1031.89	-0.67	SYW(Dioxidation)PGLFAKALEGVNIKELITNIGSGVGK	95.587	0.047	11623.2	APIS MELLIFERA	60S acidic ribosomal protein P1
[57]		147902613	3	20.6	4	1.7e-07	1483.31	742.16	2	741.87	0.29	SEGFEVSKEELTK	43.731	1.7e-07	13802.8	APIS MELLIFERA	profilin
[57]		147902613	3	20.6	4	1.7e-07	1324.39	662.7	2	662.344	0.36	AAIAGHDGNLWAK	39.555	2.1e-07	13802.8	APIS MELLIFERA	profilin
[57]		147902613	3	20.6	4	1.7e-07	2317.62	580.16	4	579.787	0.37	AAIAGHDGNLWAKSEGFEVSKE	40.652	0.025	13802.8	APIS MELLIFERA	profilin
[58]		110757651	3	14.1	3.94	8.7e-09	1768.51	884.76	2	883.98	0.78	DGVLTVEAPLPAIGTGEK	58.165	8.7e-09	25565.7	APIS MELLIFERA	PREDICTED: similar to CG14207-PB, isoform B isoform 1
[58]		110757651	3	14.1	3.94	8.7e-09	1654.47	827.74	2	827.422	0.32	FDVSQYTPEEIVVK	57.261	1.6e-07	25565.7	APIS MELLIFERA	PREDICTED: similar to CG14207-PB, isoform B isoform 1
[58]		110757651	3	14.1	3.94	8.7e-09	1507.33	754.17	2	753.888	0.28	DVSQYTPEEIVVK	51.54	3.2e-05	25565.7	APIS MELLIFERA	PREDICTED: similar to CG14207-PB, isoform B isoform 1
[59]		110766006	4	6.2	3.27	3.5e-06	1319.43	660.22	2	660.351	-0.13	LANVTFLEQER	51.17	3.5e-06	65226.1	APIS MELLIFERA	PREDICTED: hypothetical protein
[59]		110766006	4	6.2	3.27	3.5e-06	1132.65	566.83	2	566.8	0.03	MLIEEQLEK	47.832	0.0012	65226.1	APIS MELLIFERA	PREDICTED: hypothetical protein
[59]		110766006	4	6.2	3.27	3.5e-06	1741.77	871.39	2	870.936	0.45	HLDEIIEQEKTEEK	18.829	0.0017	65226.1	APIS MELLIFERA	PREDICTED: hypothetical protein
[59]		110766006	4	6.2	3.27	3.5e-06	1898.82	633.61	3	632.994	0.62	HLDEIIEQEKTEEKR	18.183	0.04	65226.1	APIS MELLIFERA	PREDICTED: hypothetical protein
[60]		74096071	2	5.1	5.06	7.7e-09	1625.35	813.18	2	812.949	0.23	TGAIVDVPVGEEILGR	59.891	7.7e-09	59956.3	CIONA INTESTINALIS	ATP synthase alpha-subunit
[60]		74096071	2	5.1	5.06	7.7e-09	1198.19	599.6	2	599.327	0.27	VVDALGNPLDGK	45.961	7.2e-07	59956.3	CIONA INTESTINALIS	ATP synthase alpha-subunit
[61]		94158711	2	21.5	4.62	8.8e-09	1744.65	872.83	2	872.442	0.39	EIGTAQQIIDDINEGK	59.126	8.8e-09	15031.6	APIS MELLIFERA	odorant binding protein 17
[61]		94158711	2	21.5	4.62	8.8e-09	1540.13	770.57	2	770.357	0.21	FNVVDENANFNEK	47.966	1.6e-07	15031.6	APIS MELLIFERA	odorant binding protein 17
[62]		15608450	2	8.6	5.07	3.3e-08	1922.83	961.92	2	961.486	0.43	DEQGQDVLLFIDNIFR	79.863	3.3e-08	53094.6	MYCOBACTERIUM TUBERCULOSIS H37RV	F0F1 ATP synthase subunit beta
[62]		15608450	2	8.6	5.07	3.3e-08	2922.3	974.77	3	974.161	0.61	TREGNDLW(Dioxidation)VELAEANVLKDTALVFGQ	82.191	0.049	53094.6	MYCOBACTERIUM TUBERCULOSIS H37RV	F0F1 ATP synthase subunit beta
[63]		156540073	3	8.7	3.82	1.1e-07	2152.15	1076.58	2	1076.06	0.52	VFDSLNYLPNLILGMDAAGK	75.088	1.1e-07	132416	NASONIA VITRIPENNIS	PREDICTED: similar to pyruvate carboxylase
[63]		156540073	3	8.7	3.82	1.1e-07	1919.13	640.38	3	639.975	0.41	ENNVDAIHPGYGFLSER	52.277	0.011	132416	NASONIA VITRIPENNIS	PREDICTED: similar to pyruvate carboxylase
[63]		156540073	3	8.7	3.82	1.1e-07	6753.7	1689.18	4	1689.79	-0.61	QKHPDVPIHIHTHDTSGSGVASMLACAKAGADVVDVAVDSMSGMTSQPSMGALVACLQGSPHETGFD	96.426	0.014	132416	NASONIA VITRIPENNIS	PREDICTED: similar to pyruvate carboxylase
[64]		66531851	3	11.9	3.6	1.1e-07	1258.13	629.57	2	628.793	0.78	VFNEYGVEDGK	23.798	1.1e-07	30048.7	APIS MELLIFERA	PREDICTED: similar to Protein disulfide-isomerase precursor (PDI), partial
[64]		66531851	3	11.9	3.6	1.1e-07	1300.69	650.85	2	650.848	0.0016	QADDIVNWVIK	58.759	0.0019	30048.7	APIS MELLIFERA	PREDICTED: similar to Protein disulfide-isomerase precursor (PDI), partial
[64]		66531851	3	11.9	3.6	1.1e-07	1103.35	552.18	2	551.816	0.36	KLQDGGFPIK	40.223	0.0054	30048.7	APIS MELLIFERA	PREDICTED: similar to Protein disulfide-isomerase precursor (PDI), partial
[65]		94158709	2	10.4	3.94	8e-07	1526.01	763.51	2	763.35	0.16	FNVVDENGNFNEK	46.837	8e-07	15204.6	APIS MELLIFERA	odorant binding protein 16
[65]		94158709	2	10.4	3.94	8e-07	1654.23	827.62	2	827.397	0.22	KFNVVDENGNFNEK	43.591	1.4e-05	15204.6	APIS MELLIFERA	odorant binding protein 16
[66]		110769113	2	5.3	4.36	5.8e-07	1532.49	766.75	2	766.849	-0.099	YAADDAEFQDFLK	57.221	5.8e-07	48252.3	APIS MELLIFERA	PREDICTED: similar to CG4409-PA, partial
[66]		110769113	2	5.3	4.36	5.8e-07	1118.39	559.7	2	559.267	0.43	SDEFHDLVR	42.452	0.047	48252.3	APIS MELLIFERA	PREDICTED: similar to CG4409-PA, partial
[67]		110759540	2	7.9	4.32	3.5e-07	1395.29	698.15	2	697.364	0.79	DILDSSVFQELK	62.662	3.5e-07	29666.9	APIS MELLIFERA	PREDICTED: similar to Probable elongation factor 1-delta (EF-1-delta)
[67]		110759540	2	7.9	4.32	3.5e-07	1118.17	559.59	2	559.296	0.29	NTVEKLEER	16.982	0.031	29666.9	APIS MELLIFERA	PREDICTED: similar to Probable elongation factor 1-delta (EF-1-delta)
[68]		110763879	2	9.5	3.67	4e-08	1468.29	734.65	2	734.826	-0.18	VAEESENFAEESK	17.795	4e-08	26983	APIS MELLIFERA	PREDICTED: hypothetical protein
[68]		110763879	2	9.5	3.67	4e-08	1224.81	612.91	2	612.809	0.1	TLDTNFKEEK	17.649	2.7e-06	26983	APIS MELLIFERA	PREDICTED: hypothetical protein
[69]		66517317	2	24.8	3.68	2.5e-07	1679.41	840.21	2	839.446	0.76	QVDVPSFSGSFGILPK	62.641	2.5e-07	17618.1	APIS MELLIFERA	PREDICTED: similar to lethal (1) G0230 CG2968-PA
[69]		66517317	2	24.8	3.68	2.5e-07	2566.5	642.38	4	642.113	0.27	HVPTLAVLKPGVVTVYEEDGSVKK	54.455	3.3e-05	17618.1	APIS MELLIFERA	PREDICTED: similar to lethal (1) G0230 CG2968-PA
[70]		48094573	2	19.3	3.9	8.7e-08	1928.47	964.74	2	964.52	0.22	EQVANALLEGSSDLIGALK	69.483	8.7e-08	19433.8	APIS MELLIFERA	PREDICTED: hypothetical protein
[70]		48094573	2	19.3	3.9	8.7e-08	1805.57	903.29	2	902.491	0.8	ASTPIENLIEIFDTIK	82.517	0.00038	19433.8	APIS MELLIFERA	PREDICTED: hypothetical protein
[71]		66515350	3	2.8	3.17	7.6e-07	1430.53	715.77	2	715.408	0.36	VSVVEAVANIMGIK	74.069	7.6e-07	261462	APIS MELLIFERA	PREDICTED: similar to CG3523-PA
[71]		66515350	3	2.8	3.17	7.6e-07	2777.13	926.38	3	925.81	0.57	KTIMDSNLQLGAMAAVGLSWEEIAAR	80.179	0.014	261462	APIS MELLIFERA	PREDICTED: similar to CG3523-PA
[71]		66515350	3	2.8	3.17	7.6e-07	3023.54	756.64	4	756.896	-0.26	EKEPIAENSHLVIASNILSSNSW(Dioxidation)NVLK	83.756	0.034	261462	APIS MELLIFERA	PREDICTED: similar to CG3523-PA
[72]		66558818	2	32	3.83	4.4e-07	1440.23	720.62	2	720.336	0.28	TSDTADDFIEGLR	54.694	4.4e-07	16540.3	APIS MELLIFERA	PREDICTED: similar to Myosin-2 essential light chain (Myosin II essential light chain) (Nonmuscle myosin essential light chain) isoform 1
[72]		66558818	2	32	3.83	4.4e-07	3653.7	914.18	4	913.718	0.46	DGNGFISSAELRHLLTTLGEKLSDEEVETLLAGH	75.485	0.022	16540.3	APIS MELLIFERA	PREDICTED: similar to Myosin-2 essential light chain (Myosin II essential light chain) (Nonmuscle myosin essential light chain) isoform 1
[73]		78101798	2	5.2	3.85	1.6e-07	1425.33	713.17	2	712.849	0.32	LETEKYDLEER	18.607	1.6e-07	48206.2	APIS MELLIFERA	TPA: TPA_exp: troponin T isoform 2
[73]		78101798	2	5.2	3.85	1.6e-07	1188.69	594.85	2	594.817	0.033	ANELWDTIVK	55.897	0.042	48206.2	APIS MELLIFERA	TPA: TPA_exp: troponin T isoform 2
[74]		66531434	3	8.9	2.69	2.2e-06	1105.43	553.22	2	552.771	0.45	TPVSEDMLGR	41.687	2.2e-06	55144.5	APIS MELLIFERA	PREDICTED: similar to Vacuolar H+-ATPase 55kD B subunit CG17369-PB, isoform B
[74]		66531434	3	8.9	2.69	2.2e-06	1314.33	657.67	2	657.807	-0.14	NFISQGSYENR	23.293	0.003	55144.5	APIS MELLIFERA	PREDICTED: similar to Vacuolar H+-ATPase 55kD B subunit CG17369-PB, isoform B
[74]		66531434	3	8.9	2.69	2.2e-06	2289.42	763.81	3	763.08	0.73	LADGSTRSGQVLEVSGSKAVVQV	60.301	0.027	55144.5	APIS MELLIFERA	PREDICTED: similar to Vacuolar H+-ATPase 55kD B subunit CG17369-PB, isoform B
[75]		283436154	2	6	3.46	3.4e-07	1410.29	705.65	2	705.357	0.29	YIWIDGTGESLR	54.441	3.4e-07	41263.9	APIS MELLIFERA	glutamine synthetase
[75]		283436154	2	6	3.46	3.4e-07	1217.07	609.04	2	608.814	0.23	YLDLPQPENK	46.616	0.032	41263.9	APIS MELLIFERA	glutamine synthetase
[76]		110750676	2	15.4	3.04	5e-06	2400.72	800.91	3	800.376	0.53	ALEWNAAHPEEDDGGQPRPPGR	45.597	5e-06	15182.7	APIS MELLIFERA	PREDICTED: similar to CG12330-PA
[76]		110750676	2	15.4	3.04	5e-06	2330.46	583.37	4	582.774	0.6	LEWNAAHPEEDDGGQPRPPGR	44.931	0.01	15182.7	APIS MELLIFERA	PREDICTED: similar to CG12330-PA
[77]		158298445	2	2.9	3.33	5.7e-07	1393.09	697.05	2	696.872	0.18	DLGKEALNEYLK	55.96	5.7e-07	101438	ANOPHELES GAMBIAE STR. PEST	AGAP009591-PA
[77]		158298445	2	2.9	3.33	5.7e-07	1807.15	904.08	2	903.441	0.64	RGNRVIPAGEWFEQM(Oxidation)	89.967	0.039	101438	ANOPHELES GAMBIAE STR. PEST	AGAP009591-PA
[78]		217795253	2	14.4	2.59	3e-06	2653.68	885.23	3	884.799	0.43	VLHDNFEIVQGLMTTVHAVTATQK	72.351	3e-06	35666.3	PORTUNUS TRITUBERCULATUS	glyceraldehyde-3-phosphate dehydrogenase
[78]		217795253	2	14.4	2.59	3e-06	2816.64	939.55	3	939.121	0.43	ITVYNEM(Oxidation)KPENIPW(Dioxidation)SKAGAEYVVE	76.483	0.023	35666.3	PORTUNUS TRITUBERCULATUS	glyceraldehyde-3-phosphate dehydrogenase
[79]		110762068	1	12.5	3.59	2.7e-07	1926.23	963.62	2	963.44	0.18	ELLEMLDSMSGLSDEEK	66.374	2.7e-07	15292.1	APIS MELLIFERA	PREDICTED: hypothetical protein
[80]		114051866	1	3.2	3.54	1.2e-06	1342.31	671.66	2	671.341	0.32	TVEAEAAHGTVTR	16.879	1.2e-06	46176.5	BOMBYX MORI	isocitrate dehydrogenase
[81]		94158731	1	22.2	2.64	2.1e-05	3500.4	1167.47	3	1166.93	0.54	QFNIVDESGNFKENIVQELTSIYLDENVIK	77.615	2.1e-05	15625.2	APIS MELLIFERA	odorant binding protein 19
[82]		66566395	1	10.9	2.57	1.2e-06	1561.25	781.13	2	780.407	0.72	QQLISGIENFDPAK	56.58	1.2e-06	13972	APIS MELLIFERA	PREDICTED: similar to ciboulot CG4944-PB, isoform B
[83]		[-1168320]	3	15.4	0.81	0.0064	1667.82	556.61	3	556.943	-0.33	DDYKMLGDKSAVVEV	38.897	0.0064	41803.2	BACDO	RecName: Full=Actin-2, muscle-specific
[83]		[-1168320]	3	15.4	0.81	0.0064	1923.21	641.74	3	641.334	0.41	YRVSW(Oxidation)AAALGDGAGSIVGR	18.082	0.035	41803.2	BACDO	RecName: Full=Actin-2, muscle-specific
[83]		[-1168320]	3	15.4	0.81	0.0064	2768.34	692.84	4	692.126	0.71	LAATITEKMNTMISIEGILKW(Dioxidation)IEK	58.669	0.042	41803.2	BACDO	RecName: Full=Actin-2, muscle-specific
[84]		[-66513649]	4	3.3	0.53	0.0096	1961.58	654.53	3	655.322	-0.79	MDENLAEELMAIALKSW	17.427	0.0096	278414	APIS MELLIFERA	PREDICTED: similar to Spectrin alpha chain
[84]		[-66513649]	4	3.3	0.53	0.0096	2736.51	912.84	3	912.809	0.031	LEITGIHADEAMAAVLVLQQDEEIK	54.215	0.015	278414	APIS MELLIFERA	PREDICTED: similar to Spectrin alpha chain
[84]		[-66513649]	4	3.3	0.53	0.0096	1898.58	633.53	3	632.941	0.59	VRCYYW(Dioxidation)DSAASESAKE	39.433	0.016	278414	APIS MELLIFERA	PREDICTED: similar to Spectrin alpha chain
[84]		[-66513649]	4	3.3	0.53	0.0096	2586.7	647.43	4	647.801	-0.37	YKVQSAYQRDASQSW(Oxidation)DHDM(Oxidation)LK	3.879	0.029	278414	APIS MELLIFERA	PREDICTED: similar to Spectrin alpha chain
[85]		[-66505007]	1	1.6	0.3	0.0098	1616.53	808.77	2	808.429	0.34	CRYVEYIVDLSKK	45.007	0.0098	91204.3	APIS MELLIFERA	PREDICTED: similar to Hsc70Cb CG6603-PA, isoform A isoform 1

## Sheet: Table 3
Rank	Uniq Pep	Acc #	Num Unique	% Cov	Best Disc Score	Best Expect Val	Protein MW	Species	Protein Name
[1]		58585098	59	60.9	6.61	1.3e-11	48886.5	APIS MELLIFERA	major royal jelly protein 1
[1-1]	6	33358394	18	27.5	6.52	1.3e-11	49045.9	APIS CERANA CERANA	major royal jelly protein MRJP1
[1-2]	6	40557703	18	27.5	6.52	1.3e-11	48969.8	APIS CERANA	major royal jelly protein MRJP1 precursor
[1-3]	6	57546158	10	26.6	4.68	4.1e-08	24696	APIS CERANA	major royal jelly protein 1
[2]		110758758	61	19.7	6.24	6.3e-11	374763	APIS MELLIFERA	PREDICTED: similar to Retinoid- and fatty-acid binding protein CG11064-PA isoform 1
[3]		155369750	28	22.3	6.47	2.5e-10	112189	APIS MELLIFERA	hexamerin 110
[4]		58585104	31	20.3	5.58	9.2e-10	201050	APIS MELLIFERA	vitellogenin
[5]		58585146	20	43.7	6.94	5.3e-12	40008.7	APIS MELLIFERA	arginine kinase
[6]		66547450	17	27	6.75	3.9e-11	60413	APIS MELLIFERA	PREDICTED: similar to 60 kDa heat shock protein, mitochondrial precursor (Hsp60) (60 kDa chaperonin) (CPN60) (Heat shock protein 60) (HSP-60) (Mitochondrial matrix protein P1)
[7]		66513649	20	9.2	4.92	1.1e-08	278414	APIS MELLIFERA	PREDICTED: similar to Spectrin alpha chain
[8]		58585154	15	44.3	5.41	3.9e-09	7584.9	APIS MELLIFERA	melittin precursor
[9]		66521738	13	33.5	5.72	5.1e-09	51930.5	APIS MELLIFERA	PREDICTED: similar to lethal (1) G0030 CG3861-PA, isoform A
[10]		66517710	14	14	5.94	7.9e-10	161988	APIS MELLIFERA	PREDICTED: similar to tripeptidyl peptidase II
[11]		66557932	12	15.2	6.57	2.4e-11	97330	APIS MELLIFERA	PREDICTED: similar to Glycogen phosphorylase isoform 2
[12]		94158854	12	21.9	5.5	7.5e-10	67357.8	APIS MELLIFERA	alpha glucosidase 2
[13]		66545506	11	25.8	4.89	2.1e-08	47174.5	APIS MELLIFERA	PREDICTED: similar to Calreticulin CG9429-PA isoform 1
[14]		66513092	8	34	6.22	1.3e-10	35801.9	APIS MELLIFERA	PREDICTED: similar to mitochondrial malate dehydrogenase precursor isoform 1
[15]		110762902	9	21.7	5.25	3.5e-09	55130.7	APIS MELLIFERA	PREDICTED: similar to ATP synthase- CG11154-PA, isoform A
[16]		110766073	8	10.7	6.45	6.7e-11	126930	APIS MELLIFERA	PREDICTED: similar to CG5065-PA
[17]		229892248	6	9.4	6.55	3.8e-11	83384.3	APIS MELLIFERA	heat shock protein 90
[18]		110763974	7	14.5	4.78	8.5e-09	49162.4	APIS MELLIFERA	PREDICTED: similar to CG31075-PA isoform 1
[19]		110764717	6	15.9	5.45	1.2e-09	46646.7	APIS MELLIFERA	PREDICTED: similar to Isocitrate dehydrogenase CG7176-PC, isoform C isoform 2
[20]		11935049	8	15.5	3.81	5.4e-07	66067.2	HOMO SAPIENS	keratin 1
[21]		58585076	6	15	4.77	1.4e-08	63898.6	APIS MELLIFERA	juvenile hormone esterase
[22]		48094441	5	18.6	5.65	9.3e-10	32900	APIS MELLIFERA	PREDICTED: similar to Tropomyosin 1 CG4898-PD, isoform D isoform 1
[23]		66534655	5	24.2	4.76	9.3e-09	17700.3	APIS MELLIFERA	PREDICTED: similar to Glutathione S transferase S1 CG8938-PA, isoform A, partial
[24]		48142692	5	23.1	5.16	5.5e-10	35883.5	APIS MELLIFERA	PREDICTED: similar to Glyceraldehyde-3-phosphate dehydrogenase 2 (Glyceraldehyde-3-phosphate dehydrogenase II) (GAPDH II) isoform 1
[25]		5627	6	18.5	4.34	4.7e-08	18487.1	APIS MELLIFERA	phospholipase A-2
[26]		297591983	4	35.1	5.15	1e-08	11623.2	APIS MELLIFERA	60S acidic ribosomal protein P1
[27]		110766532	6	18.9	4.26	1.3e-07	36004.8	APIS MELLIFERA	PREDICTED: similar to Annexin IX CG5730-PC, isoform C isoform 1
[28]		110755553	4	14.7	5.44	1.8e-09	48049.5	APIS MELLIFERA	PREDICTED: similar to aspartate aminotransferase 2 precursor isoform 1
[29]		283436154	5	16.8	4.62	5.8e-08	41263.9	APIS MELLIFERA	glutamine synthetase
[30]		94158626	5	9.5	4.21	1.9e-08	62250.9	APIS MELLIFERA	cytochrome P450 4G11
[31]		66530423	4	9.6	3.77	2.1e-07	55686	APIS MELLIFERA	PREDICTED: similar to Aldehyde dehydrogenase CG3752-PA isoform 1
[32]		66531434	6	11.7	3.26	4.4e-07	55144.5	APIS MELLIFERA	PREDICTED: similar to Vacuolar H+-ATPase 55kD B subunit CG17369-PB, isoform B
[33]		66521459	3	14.1	5.25	2e-09	30482.3	APIS MELLIFERA	PREDICTED: similar to porin CG6647-PA, isoform A
[34]		149939403	5	7.6	3.04	5.6e-06	81487.7	APIS MELLIFERA	hexamerin
[35]		110776421	5	17.8	3.43	4.5e-07	39670.1	APIS MELLIFERA	PREDICTED: similar to yellow-e2 CG17044-PA
[36]		94158718	3	30.4	5.57	9.2e-10	15203.8	APIS MELLIFERA	odorant binding protein 21
[37]		156544544	4	17.1	4.11	9e-08	27317.5	NASONIA VITRIPENNIS	PREDICTED: similar to proteasome subunit alpha type
[38]		229892214	4	7.4	4.14	4.6e-08	72866.4	APIS MELLIFERA	heat shock protein cognate 3
[39]		66531851	4	17.5	4.4	1.5e-08	30048.7	APIS MELLIFERA	PREDICTED: similar to Protein disulfide-isomerase precursor (PDI), partial
[40]		66521433	5	8	3.36	2e-07	112168	APIS MELLIFERA	PREDICTED: similar to Calcium-transporting ATPase sarcoplasmic/endoplasmic reticulum type (Calcium pump) isoform 1
[41]		66536233	4	9.4	3.43	2.9e-07	58254.4	APIS MELLIFERA	PREDICTED: similar to UGP CG4347-PA, isoform A isoform 1
[42]		62198227	4	11.7	3.27	2.3e-06	50541.4	APIS MELLIFERA	major royal jelly protein 7
[43]		48097086	3	14.2	4.72	4.4e-08	28076.7	APIS MELLIFERA	PREDICTED: similar to 14-3-3-like protein (Leonardo protein) (14-3-3 zeta) isoform 1
[44]		110765226	3	33.3	3.95	2.3e-08	11999.7	APIS MELLIFERA	PREDICTED: similar to 60S acidic ribosomal protein P2 (Acidic ribosomal protein RPA1)
[45]		66499419	3	3.9	4.17	1.2e-07	98561.1	APIS MELLIFERA	PREDICTED: similar to Puromycin sensitive aminopeptidase CG1009-PC, isoform C isoform 1
[46]		3063347	4	10.2	3.05	1.7e-06	41409	LAETMONICE SP.	elongation factor-1alpha
[47]		66515350	3	2	4.77	2.8e-08	261462	APIS MELLIFERA	PREDICTED: similar to CG3523-PA
[48]		110769113	2	5.8	5.16	3.2e-08	48252.3	APIS MELLIFERA	PREDICTED: similar to CG4409-PA, partial
[49]		66525576	4	13.5	3.1	5.1e-06	36082.5	APIS MELLIFERA	PREDICTED: similar to CG6084-PA, isoform A isoform 1
[50]		48097100	3	11.3	3.33	1.6e-06	42504.3	APIS MELLIFERA	PREDICTED: similar to yippee interacting protein 2 CG4600-PA
[51]		110765081	4	12.4	3.47	6.9e-07	44573.9	APIS MELLIFERA	PREDICTED: similar to lethal (1) G0334 CG7010-PC, isoform C isoform 1
[52]		66523390	4	8.9	3.37	8.9e-08	61643.3	APIS MELLIFERA	PREDICTED: similar to Glutamate dehydrogenase CG5320-PF, isoform F isoform 1
[53]		48102814	3	9.5	3.91	6.7e-09	39135.6	APIS MELLIFERA	PREDICTED: similar to lethal (1) G0156 CG12233-PA, isoform A
[54]		48096769	3	12.2	3.47	5.1e-07	27956	APIS MELLIFERA	PREDICTED: similar to Proteasome subunit alpha type 3 (Proteasome component C8) (Macropain subunit C8) (Multicatalytic endopeptidase complex subunit C8)
[55]		66559310	2	7.9	4.32	2e-08	34415.1	APIS MELLIFERA	PREDICTED: similar to 60S acidic ribosomal protein P0 (DNA-(apurinic or apyrimidinic site) lyase) (Apurinic-apyrimidinic endonuclease) isoform 1
[56]		66565929	2	16.1	4.34	3.7e-08	17505.7	APIS MELLIFERA	PREDICTED: similar to Ribosomal protein L14 CG6253-PA
[57]		109115260	3	5.7	2.95	1.2e-06	62101.3	MACACA MULATTA	PREDICTED: keratin, type I cytoskeletal 10-like isoform 2
[58]		110750766	3	11.2	3.27	1.5e-06	23002.2	APIS MELLIFERA	PREDICTED: similar to Protein lethal(2)essential for life (Protein Efl21)
[59]		66537377	2	9.3	4.12	3.2e-08	27105.1	APIS MELLIFERA	PREDICTED: similar to CG17489-PA.3, partial
[60]		222839154	2	6.8	4.24	2.7e-07	43095.6	POPULUS TRICHOCARPA	predicted protein
[61]		169160859	2	9.9	4.26	3.8e-08	17136.1	HOMO SAPIENS	PREDICTED: similar to actin, gamma 1
[62]		110762641	2	13.7	3.38	5.5e-07	17353.4	APIS MELLIFERA	PREDICTED: similar to Ferritin 1 heavy chain homologue CG2216-PE, isoform E
[63]		110768336	1	7	5.61	3e-09	22844.7	APIS MELLIFERA	PREDICTED: similar to Ribosomal protein L11 CG7726-PA
[64]		66506623	2	5.9	2.84	1.8e-06	23885	APIS MELLIFERA	PREDICTED: similar to 60S ribosomal protein L15
[65]		71906104	2	10.6	3.09	3e-07	22712.5	DECHLOROMONAS AROMATICA RCB	OmpA/MotB
[66]		66522386	2	8.5	3.06	2.8e-07	32157.3	APIS MELLIFERA	PREDICTED: similar to Tropomyosin 2 CG4843-PB, isoform B
[67]		66508940	1	4.5	4.37	3.5e-07	29906.9	APIS MELLIFERA	PREDICTED: similar to CG6459-PA
[68]		295842193	1	11.1	4.27	4.3e-08	11909.8	APIS MELLIFERA	cytochrome c
[69]		66534286	1	2.1	4.2	5.9e-08	88896.3	APIS MELLIFERA	PREDICTED: similar to TER94 CG2331-PA, isoform A isoform 1
[70]		74096071	1	2.2	4.1	2.1e-07	59956.3	CIONA INTESTINALIS	ATP synthase alpha-subunit
[71]		110759197	1	3	3.79	1.3e-07	50103.2	APIS MELLIFERA	PREDICTED: similar to Cytochrome b5-related CG13279-PA
[72]		66549799	2	8.3	2.24	9.5e-06	26606.6	APIS MELLIFERA	PREDICTED: similar to Ribosomal protein L23A CG7977-PA
[73]		110761561	1	1.9	2.84	1.4e-06	59756.2	APIS MELLIFERA	PREDICTED: similar to Malic enzyme CG10120-PB, isoform B isoform 1, partial
[74]		110749015	1	6.3	2.72	1.6e-06	26510.8	APIS MELLIFERA	PREDICTED: similar to CG10962-PB, isoform B
[75]		[-110761561]	1	5	0.7	0.0086	59756.2	APIS MELLIFERA	PREDICTED: similar to Malic enzyme CG10120-PB, isoform B isoform 1, partial
[76]		[-15010456]	1	2.2	0.01	0.0048	67887.6	DROSOPHILA MELANOGASTER	GH05807p

## Sheet: Table 4
	Uniq Peptide	Acc #	Num Unique	% Cov	Best Disc Score	Best Expect Val	M+H	m/z	z	m/z Calc	Da	Peptide	RT	Expect	Protein MW	Species	Protein Name
[1]		58585098	59	60.9	6.61	1.3e-11	2126.51	1063.76	2	1063.02	0.74	YSPVASTSLYYVNTEQFR	59.546	1.3e-11	48886.5	APIS MELLIFERA	major royal jelly protein 1
[1]		58585098	59	60.9	6.61	1.3e-11	1770.43	885.72	2	884.926	0.79	TVAQSDETLQMIASM(Oxidation)K	53.731	4.7e-11	48886.5	APIS MELLIFERA	major royal jelly protein 1
[1]		58585098	59	60.9	6.61	1.3e-11	1754.39	877.7	2	876.929	0.77	TVAQSDETLQMIASMK	63.519	1.7e-10	48886.5	APIS MELLIFERA	major royal jelly protein 1
[1]		58585098	59	60.9	6.61	1.3e-11	1786.43	893.72	2	892.924	0.8	TVAQSDETLQM(Oxidation)IASM(Oxidation)K	51.597	8.3e-10	48886.5	APIS MELLIFERA	major royal jelly protein 1
[1]		58585098	59	60.9	6.61	1.3e-11	1764.33	882.67	2	881.878	0.79	M(Oxidation)VNNDFNFDDVNFR	61.276	1.2e-09	48886.5	APIS MELLIFERA	major royal jelly protein 1
[1]		58585098	59	60.9	6.61	1.3e-11	1690.31	845.66	2	845.379	0.28	GEGLIVYHNSDDSFH	50.253	1.2e-09	48886.5	APIS MELLIFERA	major royal jelly protein 1
[1]		58585098	59	60.9	6.61	1.3e-11	1748.29	874.65	2	873.881	0.77	MVNNDFNFDDVNFR	60.373	1.7e-09	48886.5	APIS MELLIFERA	major royal jelly protein 1
[1]		58585098	59	60.9	6.61	1.3e-11	2075.75	1038.38	2	1038.03	0.35	KVGDGGPLLQPYPDWSFAK	63.04	2.4e-09	48886.5	APIS MELLIFERA	major royal jelly protein 1
[1]		58585098	59	60.9	6.61	1.3e-11	1769.31	885.16	2	884.926	0.23	TVAQSDETLQM(Oxidation)IASMK	56.038	2.6e-09	48886.5	APIS MELLIFERA	major royal jelly protein 1
[1]		58585098	59	60.9	6.61	1.3e-11	1398.21	699.61	2	699.286	0.32	FFDYDFGSDER	102.348	6.9e-09	48886.5	APIS MELLIFERA	major royal jelly protein 1
[1]		58585098	59	60.9	6.61	1.3e-11	1403.31	702.16	2	701.805	0.36	NDFNFDDVNFR	58.577	1e-08	48886.5	APIS MELLIFERA	major royal jelly protein 1
[1]		58585098	59	60.9	6.61	1.3e-11	1947.55	974.28	2	973.986	0.29	VGDGGPLLQPYPDWSFAK	65.893	1.9e-08	48886.5	APIS MELLIFERA	major royal jelly protein 1
[1]		58585098	59	60.9	6.61	1.3e-11	1846.47	923.74	2	923.429	0.31	GEGLIVYHNSDDSFHR	48.235	2.3e-08	48886.5	APIS MELLIFERA	major royal jelly protein 1
[1]		58585098	59	60.9	6.61	1.3e-11	1962.29	981.65	2	981.484	0.17	SPVASTSLYYVNTEQFR	57.356	2.4e-08	48886.5	APIS MELLIFERA	major royal jelly protein 1
[1]		58585098	59	60.9	6.61	1.3e-11	1848.39	924.7	2	924.452	0.25	GDGGPLLQPYPDWSFAK	63.899	4.1e-08	48886.5	APIS MELLIFERA	major royal jelly protein 1
[1]		58585098	59	60.9	6.61	1.3e-11	1614.45	807.73	2	807.935	-0.21	IMNANVNELILNTR	60.96	7.1e-08	48886.5	APIS MELLIFERA	major royal jelly protein 1
[1]		58585098	59	60.9	6.61	1.3e-11	1401.59	701.3	2	701.33	-0.03	QDAILSGEYDYK	50.131	1.2e-07	48886.5	APIS MELLIFERA	major royal jelly protein 1
[1]		58585098	59	60.9	6.61	1.3e-11	1354.01	677.51	2	677.323	0.19	SDETLQMIASMK	56.961	1.5e-07	48886.5	APIS MELLIFERA	major royal jelly protein 1
[1]		58585098	59	60.9	6.61	1.3e-11	1558.41	779.71	2	779.381	0.33	RQDAILSGEYDYK	48.61	1.5e-07	48886.5	APIS MELLIFERA	major royal jelly protein 1
[1]		58585098	59	60.9	6.61	1.3e-11	1494.29	747.65	2	746.935	0.72	LLTFDLTTSQLLK	70.293	1.7e-07	48886.5	APIS MELLIFERA	major royal jelly protein 1
[1]		58585098	59	60.9	6.61	1.3e-11	1631.37	816.19	2	815.933	0.26	IM(Oxidation)NANVNELILNTR	55.512	2.1e-07	48886.5	APIS MELLIFERA	major royal jelly protein 1
[1]		58585098	59	60.9	6.61	1.3e-11	1633.05	817.03	2	816.358	0.67	NNYPSDIDQWHDK	49.192	2.9e-07	48886.5	APIS MELLIFERA	major royal jelly protein 1
[1]		58585098	59	60.9	6.61	1.3e-11	1516.51	758.76	2	758.826	-0.066	NNDFNFDDVNFR	58.538	3.3e-07	48886.5	APIS MELLIFERA	major royal jelly protein 1
[1]		58585098	59	60.9	6.61	1.3e-11	1980.41	990.71	2	989.981	0.73	VGDGGPLLQPYPDW(Dioxidation)SFAK	62.125	5.9e-07	48886.5	APIS MELLIFERA	major royal jelly protein 1
[1]		58585098	59	60.9	6.61	1.3e-11	1188.17	594.59	2	594.264	0.33	TSNTFDYDPK	44.353	8.2e-07	48886.5	APIS MELLIFERA	major royal jelly protein 1
[1]		58585098	59	60.9	6.61	1.3e-11	1289.07	645.04	2	644.783	0.26	DFNFDDVNFR	59.957	1.2e-06	48886.5	APIS MELLIFERA	major royal jelly protein 1
[1]		58585098	59	60.9	6.61	1.3e-11	1301.09	651.05	2	650.806	0.24	LTSNTFDYDPK	49.642	1.4e-06	48886.5	APIS MELLIFERA	major royal jelly protein 1
[1]		58585098	59	60.9	6.61	1.3e-11	1372.19	686.6	2	685.873	0.73	NANVNELILNTR	52.988	1.4e-06	48886.5	APIS MELLIFERA	major royal jelly protein 1
[1]		58585098	59	60.9	6.61	1.3e-11	1104.21	552.61	2	552.217	0.39	DYDFGSDER	44.152	1.8e-06	48886.5	APIS MELLIFERA	major royal jelly protein 1
[1]		58585098	59	60.9	6.61	1.3e-11	3171.54	793.64	4	793.367	0.27	RQDAILSGEYDYKNNYPSDIDQWHDK	77.714	2e-06	48886.5	APIS MELLIFERA	major royal jelly protein 1
[1]		58585098	59	60.9	6.61	1.3e-11	2855.88	952.63	3	952.109	0.52	TSDYQQNDIHYEGVQNILDTQSSAK	55.955	2e-06	48886.5	APIS MELLIFERA	major royal jelly protein 1
[1]		58585098	59	60.9	6.61	1.3e-11	1220.21	610.61	2	610.291	0.32	YYVNTEQFR	48.896	2.5e-06	48886.5	APIS MELLIFERA	major royal jelly protein 1
[1]		58585098	59	60.9	6.61	1.3e-11	1404.31	702.66	2	702.315	0.35	YPSDIDQWHDK	46.857	2.9e-06	48886.5	APIS MELLIFERA	major royal jelly protein 1
[1]		58585098	59	60.9	6.61	1.3e-11	1266.59	633.8	2	633.851	-0.051	TFDLTTSQLLK	59.511	3.7e-06	48886.5	APIS MELLIFERA	major royal jelly protein 1
[1]		58585098	59	60.9	6.61	1.3e-11	1122.67	561.84	2	561.819	0.021	SLPILHEWK	55	5e-06	48886.5	APIS MELLIFERA	major royal jelly protein 1
[1]		58585098	59	60.9	6.61	1.3e-11	1185.49	593.25	2	593.333	-0.083	NVNELILNTR	51.292	1.1e-05	48886.5	APIS MELLIFERA	major royal jelly protein 1
[1]		58585098	59	60.9	6.61	1.3e-11	1535.13	768.07	2	767.941	0.13	IKEALPHVPIFDR	56.184	1.6e-05	48886.5	APIS MELLIFERA	major royal jelly protein 1
[1]		58585098	59	60.9	6.61	1.3e-11	1155.25	578.13	2	577.814	0.32	SLPILHEW(Dioxidation)K	52.734	1.7e-05	48886.5	APIS MELLIFERA	major royal jelly protein 1
[1]		58585098	59	60.9	6.61	1.3e-11	1490.37	745.69	2	745.378	0.31	EGVQNILDTQSSAK	49.955	1.8e-05	48886.5	APIS MELLIFERA	major royal jelly protein 1
[1]		58585098	59	60.9	6.61	1.3e-11	1377.59	689.3	2	689.372	-0.072	YNGVPSSLNVISK	53.263	2e-05	48886.5	APIS MELLIFERA	major royal jelly protein 1
[1]		58585098	59	60.9	6.61	1.3e-11	2389.32	797.11	3	796.719	0.39	QQNDIHYEGVQNILDTQSSAK	54.56	2.8e-05	48886.5	APIS MELLIFERA	major royal jelly protein 1
[1]		58585098	59	60.9	6.61	1.3e-11	1294.29	647.65	2	647.351	0.3	EALPHVPIFDR	57.385	3.7e-05	48886.5	APIS MELLIFERA	major royal jelly protein 1
[1]		58585098	59	60.9	6.61	1.3e-11	1406.25	703.63	2	703.315	0.31	GEGLIVYHNSDDS	46.654	5.3e-05	48886.5	APIS MELLIFERA	major royal jelly protein 1
[1]		58585098	59	60.9	6.61	1.3e-11	2259.93	753.98	3	754.033	-0.053	QNDIHYEGVQNILDTQSSAK	54.649	0.00012	48886.5	APIS MELLIFERA	major royal jelly protein 1
[1]		58585098	59	60.9	6.61	1.3e-11	1245.23	623.12	2	622.777	0.34	YDDCSGIVSASK	46.608	0.00015	48886.5	APIS MELLIFERA	major royal jelly protein 1
[1]		58585098	59	60.9	6.61	1.3e-11	1554.35	777.68	2	777.336	0.34	FFDYDFGSDERR	53.477	0.00021	48886.5	APIS MELLIFERA	major royal jelly protein 1
[1]		58585098	59	60.9	6.61	1.3e-11	1876.35	938.68	2	938.467	0.21	KVGDGGPLLQPYPDWSF	67.54	0.00029	48886.5	APIS MELLIFERA	major royal jelly protein 1
[1]		58585098	59	60.9	6.61	1.3e-11	1260.21	630.61	2	630.268	0.34	DYDFGSDERR	41.969	0.00035	48886.5	APIS MELLIFERA	major royal jelly protein 1
[1]		58585098	59	60.9	6.61	1.3e-11	1144.15	572.58	2	572.257	0.32	SDIDQWHDK	38.696	0.00041	48886.5	APIS MELLIFERA	major royal jelly protein 1
[1]		58585098	59	60.9	6.61	1.3e-11	1646.61	823.81	2	823.373	0.44	GLVGDSALGCW(Dioxidation)NEHR	54.782	0.00042	48886.5	APIS MELLIFERA	major royal jelly protein 1
[1]		58585098	59	60.9	6.61	1.3e-11	1904.25	952.63	2	951.981	0.65	IHYEGVQNILDTQSSAK	55.955	0.00057	48886.5	APIS MELLIFERA	major royal jelly protein 1
[1]		58585098	59	60.9	6.61	1.3e-11	2403.5	601.63	4	601.29	0.34	IADEKGEGLIVYHNSDDSFHR	49.161	0.00086	48886.5	APIS MELLIFERA	major royal jelly protein 1
[1]		58585098	59	60.9	6.61	1.3e-11	2107.62	703.21	3	703.021	0.19	KVGDGGPLLQPYPDW(Dioxidation)SFAK	60.177	0.0039	48886.5	APIS MELLIFERA	major royal jelly protein 1
[1]		58585098	59	60.9	6.61	1.3e-11	1138.39	569.7	2	569.301	0.4	EALPHVPIFD	60.49	0.0061	48886.5	APIS MELLIFERA	major royal jelly protein 1
[1]		58585098	59	60.9	6.61	1.3e-11	2095.68	699.23	3	698.657	0.57	FFDYDFGSDERRQDAIL	83.923	0.014	48886.5	APIS MELLIFERA	major royal jelly protein 1
[1]		58585098	59	60.9	6.61	1.3e-11	2155.99	1078.5	2	1078.6	-0.097	IFDRYINREYILVLSNK	52.975	0.025	48886.5	APIS MELLIFERA	major royal jelly protein 1
[1]		58585098	59	60.9	6.61	1.3e-11	3069.26	768.07	4	767.903	0.17	AQSDETLQMIASMKIKEALPHVPIFDR	56.184	0.034	48886.5	APIS MELLIFERA	major royal jelly protein 1
[1]		58585098	59	60.9	6.61	1.3e-11	1139.51	570.26	2	569.816	0.44	SLPILHEW(Oxidation)K	48.857	0.038	48886.5	APIS MELLIFERA	major royal jelly protein 1
[1]		58585098	59	60.9	6.61	1.3e-11	3230.02	808.26	4	807.644	0.62	VNNDFNFDDVNFRIM(Oxidation)NANVNELILNTR	75.176	0.046	48886.5	APIS MELLIFERA	major royal jelly protein 1
[1-1]	6	33358394	18	27.5	6.52	1.3e-11	2126.51	1063.76	2	1063.02	0.74	YSPVASTSLYYVNTEQFR	59.546	1.3e-11	49045.9	APIS CERANA CERANA	major royal jelly protein MRJP1
[1-1]	6	33358394	18	27.5	6.52	1.3e-11	1962.29	981.65	2	981.484	0.17	SPVASTSLYYVNTEQFR	57.356	2.4e-08	49045.9	APIS CERANA CERANA	major royal jelly protein MRJP1
[1-1]	6	33358394	18	27.5	6.52	1.3e-11	1848.39	924.7	2	924.452	0.25	GDGGPLLQPYPDWSFAK	63.899	4.1e-08	49045.9	APIS CERANA CERANA	major royal jelly protein MRJP1
[1-1]	6	33358394	18	27.5	6.52	1.3e-11	1494.29	747.65	2	746.935	0.72	LLTFDLTTSQLLK	70.293	1.7e-07	49045.9	APIS CERANA CERANA	major royal jelly protein MRJP1
[1-1]	6	33358394	18	27.5	6.52	1.3e-11	1558.29	779.65	2	779.381	0.27	QDAILSGEYDYRK	47.795	8.8e-07	49045.9	APIS CERANA CERANA	major royal jelly protein MRJP1
[1-1]	6	33358394	18	27.5	6.52	1.3e-11	1220.21	610.61	2	610.291	0.32	YYVNTEQFR	48.896	2.5e-06	49045.9	APIS CERANA CERANA	major royal jelly protein MRJP1
[1-1]	6	33358394	18	27.5	6.52	1.3e-11	1266.59	633.8	2	633.851	-0.051	TFDLTTSQLLK	59.511	3.7e-06	49045.9	APIS CERANA CERANA	major royal jelly protein MRJP1
[1-1]	6	33358394	18	27.5	6.52	1.3e-11	1535.13	768.07	2	767.941	0.13	IKEALPHVPIFDR	56.184	1.6e-05	49045.9	APIS CERANA CERANA	major royal jelly protein MRJP1
[1-1]	6	33358394	18	27.5	6.52	1.3e-11	1490.37	745.69	2	745.378	0.31	EGVQNILDTQSSAK	49.955	1.8e-05	49045.9	APIS CERANA CERANA	major royal jelly protein MRJP1
[1-1]	6	33358394	18	27.5	6.52	1.3e-11	1377.59	689.3	2	689.372	-0.072	YNGVPSSLNVISK	53.263	2e-05	49045.9	APIS CERANA CERANA	major royal jelly protein MRJP1
[1-1]	6	33358394	18	27.5	6.52	1.3e-11	1541.43	771.22	2	770.868	0.35	Q(Gln->pyro-Glu)DAILSGEYDYRK	52.205	2e-05	49045.9	APIS CERANA CERANA	major royal jelly protein MRJP1
[1-1]	6	33358394	18	27.5	6.52	1.3e-11	2091.09	697.7	3	697.03	0.67	KIGDGGPLLQPYPDWSFAK	63.144	2.9e-05	49045.9	APIS CERANA CERANA	major royal jelly protein MRJP1
[1-1]	6	33358394	18	27.5	6.52	1.3e-11	1294.29	647.65	2	647.351	0.3	EALPHVPIFDR	57.385	3.7e-05	49045.9	APIS CERANA CERANA	major royal jelly protein MRJP1
[1-1]	6	33358394	18	27.5	6.52	1.3e-11	1646.61	823.81	2	823.373	0.44	GLVGDSALGCW(Dioxidation)NEHR	54.782	0.00042	49045.9	APIS CERANA CERANA	major royal jelly protein MRJP1
[1-1]	6	33358394	18	27.5	6.52	1.3e-11	3113.13	1038.38	3	1038.56	-0.18	VPSSLNVISKKIGDGGPLLQPYPDWSFAK	62.171	0.00084	49045.9	APIS CERANA CERANA	major royal jelly protein MRJP1
[1-1]	6	33358394	18	27.5	6.52	1.3e-11	1138.39	569.7	2	569.301	0.4	EALPHVPIFD	60.49	0.0061	49045.9	APIS CERANA CERANA	major royal jelly protein MRJP1
[1-1]	6	33358394	18	27.5	6.52	1.3e-11	1586.27	793.64	2	793.384	0.26	RQDAILSGEYDYR	77.714	0.0064	49045.9	APIS CERANA CERANA	major royal jelly protein MRJP1
[1-1]	6	33358394	18	27.5	6.52	1.3e-11	1961.83	981.42	2	980.994	0.43	IGDGGPLLQPYPDWSFAK	65.472	0.013	49045.9	APIS CERANA CERANA	major royal jelly protein MRJP1
[1-2]	6	40557703	18	27.5	6.52	1.3e-11	2126.51	1063.76	2	1063.02	0.74	YSPVASTSLYYVNTEQFR	59.546	1.3e-11	48969.8	APIS CERANA	major royal jelly protein MRJP1 precursor
[1-2]	6	40557703	18	27.5	6.52	1.3e-11	1962.29	981.65	2	981.484	0.17	SPVASTSLYYVNTEQFR	57.356	2.4e-08	48969.8	APIS CERANA	major royal jelly protein MRJP1 precursor
[1-2]	6	40557703	18	27.5	6.52	1.3e-11	1848.39	924.7	2	924.452	0.25	GDGGPLLQPYPDWSFAK	63.899	4.1e-08	48969.8	APIS CERANA	major royal jelly protein MRJP1 precursor
[1-2]	6	40557703	18	27.5	6.52	1.3e-11	1494.29	747.65	2	746.935	0.72	LLTFDLTTSQLLK	70.293	1.7e-07	48969.8	APIS CERANA	major royal jelly protein MRJP1 precursor
[1-2]	6	40557703	18	27.5	6.52	1.3e-11	1558.29	779.65	2	779.381	0.27	QDAILSGEYDYRK	47.795	8.8e-07	48969.8	APIS CERANA	major royal jelly protein MRJP1 precursor
[1-2]	6	40557703	18	27.5	6.52	1.3e-11	1220.21	610.61	2	610.291	0.32	YYVNTEQFR	48.896	2.5e-06	48969.8	APIS CERANA	major royal jelly protein MRJP1 precursor
[1-2]	6	40557703	18	27.5	6.52	1.3e-11	1266.59	633.8	2	633.851	-0.051	TFDLTTSQLLK	59.511	3.7e-06	48969.8	APIS CERANA	major royal jelly protein MRJP1 precursor
[1-2]	6	40557703	18	27.5	6.52	1.3e-11	1535.13	768.07	2	767.941	0.13	IKEALPHVPIFDR	56.184	1.6e-05	48969.8	APIS CERANA	major royal jelly protein MRJP1 precursor
[1-2]	6	40557703	18	27.5	6.52	1.3e-11	1490.37	745.69	2	745.378	0.31	EGVQNILDTQSSAK	49.955	1.8e-05	48969.8	APIS CERANA	major royal jelly protein MRJP1 precursor
[1-2]	6	40557703	18	27.5	6.52	1.3e-11	1377.59	689.3	2	689.372	-0.072	YNGVPSSLNVISK	53.263	2e-05	48969.8	APIS CERANA	major royal jelly protein MRJP1 precursor
[1-2]	6	40557703	18	27.5	6.52	1.3e-11	1541.43	771.22	2	770.868	0.35	Q(Gln->pyro-Glu)DAILSGEYDYRK	52.205	2e-05	48969.8	APIS CERANA	major royal jelly protein MRJP1 precursor
[1-2]	6	40557703	18	27.5	6.52	1.3e-11	2091.09	697.7	3	697.03	0.67	KIGDGGPLLQPYPDWSFAK	63.144	2.9e-05	48969.8	APIS CERANA	major royal jelly protein MRJP1 precursor
[1-2]	6	40557703	18	27.5	6.52	1.3e-11	1294.29	647.65	2	647.351	0.3	EALPHVPIFDR	57.385	3.7e-05	48969.8	APIS CERANA	major royal jelly protein MRJP1 precursor
[1-2]	6	40557703	18	27.5	6.52	1.3e-11	1646.61	823.81	2	823.373	0.44	GLVGDSALGCW(Dioxidation)NEHR	54.782	0.00042	48969.8	APIS CERANA	major royal jelly protein MRJP1 precursor
[1-2]	6	40557703	18	27.5	6.52	1.3e-11	3113.13	1038.38	3	1038.56	-0.18	VPSSLNVISKKIGDGGPLLQPYPDWSFAK	62.171	0.00084	48969.8	APIS CERANA	major royal jelly protein MRJP1 precursor
[1-2]	6	40557703	18	27.5	6.52	1.3e-11	1138.39	569.7	2	569.301	0.4	EALPHVPIFD	60.49	0.0061	48969.8	APIS CERANA	major royal jelly protein MRJP1 precursor
[1-2]	6	40557703	18	27.5	6.52	1.3e-11	1586.27	793.64	2	793.384	0.26	RQDAILSGEYDYR	77.714	0.0064	48969.8	APIS CERANA	major royal jelly protein MRJP1 precursor
[1-2]	6	40557703	18	27.5	6.52	1.3e-11	1961.83	981.42	2	980.994	0.43	IGDGGPLLQPYPDWSFAK	65.472	0.013	48969.8	APIS CERANA	major royal jelly protein MRJP1 precursor
[1-3]	6	57546158	10	26.6	4.68	4.1e-08	1848.39	924.7	2	924.452	0.25	GDGGPLLQPYPDWSFAK	63.899	4.1e-08	24696	APIS CERANA	major royal jelly protein 1
[1-3]	6	57546158	10	26.6	4.68	4.1e-08	1494.29	747.65	2	746.935	0.72	LLTFDLTTSQLLK	70.293	1.7e-07	24696	APIS CERANA	major royal jelly protein 1
[1-3]	6	57546158	10	26.6	4.68	4.1e-08	1558.29	779.65	2	779.381	0.27	QDAILSGEYDYRK	47.795	8.8e-07	24696	APIS CERANA	major royal jelly protein 1
[1-3]	6	57546158	10	26.6	4.68	4.1e-08	1266.59	633.8	2	633.851	-0.051	TFDLTTSQLLK	59.511	3.7e-06	24696	APIS CERANA	major royal jelly protein 1
[1-3]	6	57546158	10	26.6	4.68	4.1e-08	1377.59	689.3	2	689.372	-0.072	YNGVPSSLNVISK	53.263	2e-05	24696	APIS CERANA	major royal jelly protein 1
[1-3]	6	57546158	10	26.6	4.68	4.1e-08	1541.43	771.22	2	770.868	0.35	Q(Gln->pyro-Glu)DAILSGEYDYRK	52.205	2e-05	24696	APIS CERANA	major royal jelly protein 1
[1-3]	6	57546158	10	26.6	4.68	4.1e-08	2091.09	697.7	3	697.03	0.67	KIGDGGPLLQPYPDWSFAK	63.144	2.9e-05	24696	APIS CERANA	major royal jelly protein 1
[1-3]	6	57546158	10	26.6	4.68	4.1e-08	3113.13	1038.38	3	1038.56	-0.18	VPSSLNVISKKIGDGGPLLQPYPDWSFAK	62.171	0.00084	24696	APIS CERANA	major royal jelly protein 1
[1-3]	6	57546158	10	26.6	4.68	4.1e-08	1586.27	793.64	2	793.384	0.26	RQDAILSGEYDYR	77.714	0.0064	24696	APIS CERANA	major royal jelly protein 1
[1-3]	6	57546158	10	26.6	4.68	4.1e-08	1961.83	981.42	2	980.994	0.43	IGDGGPLLQPYPDWSFAK	65.472	0.013	24696	APIS CERANA	major royal jelly protein 1
[2]		110758758	60	19.6	6.24	6.3e-11	1963.73	982.37	2	981.958	0.41	NIVAYDQDNVYTFADSK	56.388	6.3e-11	374763	APIS MELLIFERA	PREDICTED: similar to Retinoid- and fatty-acid binding protein CG11064-PA isoform 1
[2]		110758758	60	19.6	6.24	6.3e-11	1338.39	669.7	2	669.393	0.31	SPNPSGVLVLNLK	58.107	2.3e-09	374763	APIS MELLIFERA	PREDICTED: similar to Retinoid- and fatty-acid binding protein CG11064-PA isoform 1
[2]		110758758	60	19.6	6.24	6.3e-11	1902.49	951.75	2	951.464	0.29	ENVNQGLVSGNTDAEAGVK	47.19	8.7e-09	374763	APIS MELLIFERA	PREDICTED: similar to Retinoid- and fatty-acid binding protein CG11064-PA isoform 1
[2]		110758758	60	19.6	6.24	6.3e-11	1363.87	682.44	2	682.359	0.081	IADSLVNVEFEK	55.738	3.1e-08	374763	APIS MELLIFERA	PREDICTED: similar to Retinoid- and fatty-acid binding protein CG11064-PA isoform 1
[2]		110758758	60	19.6	6.24	6.3e-11	1416.65	708.83	2	708.836	-0.0057	ITESGTEFGNAYK	46.363	5.7e-08	374763	APIS MELLIFERA	PREDICTED: similar to Retinoid- and fatty-acid binding protein CG11064-PA isoform 1
[2]		110758758	60	19.6	6.24	6.3e-11	1243.19	622.1	2	621.804	0.3	EFNFGTELSAK	55.093	7.1e-08	374763	APIS MELLIFERA	PREDICTED: similar to Retinoid- and fatty-acid binding protein CG11064-PA isoform 1
[2]		110758758	60	19.6	6.24	6.3e-11	1406.63	703.82	2	703.873	-0.053	NIHAEIANQPTAK	42.066	7.3e-08	374763	APIS MELLIFERA	PREDICTED: similar to Retinoid- and fatty-acid binding protein CG11064-PA isoform 1
[2]		110758758	60	19.6	6.24	6.3e-11	1621.25	811.13	2	810.915	0.21	ALGNSQFLDDATLQK	55.184	9.4e-08	374763	APIS MELLIFERA	PREDICTED: similar to Retinoid- and fatty-acid binding protein CG11064-PA isoform 1
[2]		110758758	60	19.6	6.24	6.3e-11	1257.15	629.08	2	628.828	0.25	ADNPTVTVSQPK	42.519	1e-07	374763	APIS MELLIFERA	PREDICTED: similar to Retinoid- and fatty-acid binding protein CG11064-PA isoform 1
[2]		110758758	60	19.6	6.24	6.3e-11	1639.63	820.32	2	819.922	0.4	FEEGKPIISYQEAK	48.79	1.4e-07	374763	APIS MELLIFERA	PREDICTED: similar to Retinoid- and fatty-acid binding protein CG11064-PA isoform 1
[2]		110758758	60	19.6	6.24	6.3e-11	1698.11	849.56	2	849.897	-0.34	SGVVTDGGHFFTFDGR	56.857	2.7e-07	374763	APIS MELLIFERA	PREDICTED: similar to Retinoid- and fatty-acid binding protein CG11064-PA isoform 1
[2]		110758758	60	19.6	6.24	6.3e-11	1198.57	599.79	2	599.751	0.039	HDQMEYYGR	29.966	5.5e-07	374763	APIS MELLIFERA	PREDICTED: similar to Retinoid- and fatty-acid binding protein CG11064-PA isoform 1
[2]		110758758	60	19.6	6.24	6.3e-11	1373.21	687.11	2	686.908	0.2	EVALILIYDVPK	66.303	1.3e-06	374763	APIS MELLIFERA	PREDICTED: similar to Retinoid- and fatty-acid binding protein CG11064-PA isoform 1
[2]		110758758	60	19.6	6.24	6.3e-11	1530.21	765.61	2	765.399	0.21	SSPLLGSQQSIEQR	47.809	2.3e-06	374763	APIS MELLIFERA	PREDICTED: similar to Retinoid- and fatty-acid binding protein CG11064-PA isoform 1
[2]		110758758	60	19.6	6.24	6.3e-11	1365.15	683.08	2	682.359	0.72	SFEILLDTPNSK	57.9	2.3e-06	374763	APIS MELLIFERA	PREDICTED: similar to Retinoid- and fatty-acid binding protein CG11064-PA isoform 1
[2]		110758758	60	19.6	6.24	6.3e-11	1261.35	631.18	2	630.825	0.35	LVSGNTDAEAGVK	40.207	2.8e-06	374763	APIS MELLIFERA	PREDICTED: similar to Retinoid- and fatty-acid binding protein CG11064-PA isoform 1
[2]		110758758	60	19.6	6.24	6.3e-11	1651.11	826.06	2	825.415	0.64	DMLNVISGMSQDIVK	69.998	3.1e-06	374763	APIS MELLIFERA	PREDICTED: similar to Retinoid- and fatty-acid binding protein CG11064-PA isoform 1
[2]		110758758	60	19.6	6.24	6.3e-11	1358.03	679.52	2	679.37	0.15	LIINSQIDADGAK	49.905	4e-06	374763	APIS MELLIFERA	PREDICTED: similar to Retinoid- and fatty-acid binding protein CG11064-PA isoform 1
[2]		110758758	60	19.6	6.24	6.3e-11	1316.25	658.63	2	658.359	0.27	TGEAAEVGVELIK	53.159	7e-06	374763	APIS MELLIFERA	PREDICTED: similar to Retinoid- and fatty-acid binding protein CG11064-PA isoform 1
[2]		110758758	60	19.6	6.24	6.3e-11	1333.53	667.27	2	667.372	-0.1	LDNVDLQLLYK	59.845	9.6e-06	374763	APIS MELLIFERA	PREDICTED: similar to Retinoid- and fatty-acid binding protein CG11064-PA isoform 1
[2]		110758758	60	19.6	6.24	6.3e-11	1488.87	744.94	2	744.886	0.054	ASAEAVLKDTAQER	47.163	1e-05	374763	APIS MELLIFERA	PREDICTED: similar to Retinoid- and fatty-acid binding protein CG11064-PA isoform 1
[2]		110758758	60	19.6	6.24	6.3e-11	1286.09	643.55	2	643.367	0.18	SPFPISLQQLR	61.498	2e-05	374763	APIS MELLIFERA	PREDICTED: similar to Retinoid- and fatty-acid binding protein CG11064-PA isoform 1
[2]		110758758	60	19.6	6.24	6.3e-11	1232.33	616.67	2	616.361	0.31	LGYLGVGQVIGR	56.772	2.8e-05	374763	APIS MELLIFERA	PREDICTED: similar to Retinoid- and fatty-acid binding protein CG11064-PA isoform 1
[2]		110758758	60	19.6	6.24	6.3e-11	1209.37	605.19	2	604.83	0.36	LKYEGELTQK	43.416	3.1e-05	374763	APIS MELLIFERA	PREDICTED: similar to Retinoid- and fatty-acid binding protein CG11064-PA isoform 1
[2]		110758758	60	19.6	6.24	6.3e-11	1151.21	576.11	2	575.319	0.79	FNVPVEFGLK	60.675	5.1e-05	374763	APIS MELLIFERA	PREDICTED: similar to Retinoid- and fatty-acid binding protein CG11064-PA isoform 1
[2]		110758758	60	19.6	6.24	6.3e-11	1130.15	565.58	2	565.314	0.27	SNSLELKPGGK	33.674	5.4e-05	374763	APIS MELLIFERA	PREDICTED: similar to Retinoid- and fatty-acid binding protein CG11064-PA isoform 1
[2]		110758758	60	19.6	6.24	6.3e-11	1759.23	587.08	3	586.289	0.79	DKTEYTYQAYIHPK	48.529	7.2e-05	374763	APIS MELLIFERA	PREDICTED: similar to Retinoid- and fatty-acid binding protein CG11064-PA isoform 1
[2]		110758758	60	19.6	6.24	6.3e-11	1107.49	554.25	2	554.298	-0.048	SISITVTSDGK	46.559	0.00014	374763	APIS MELLIFERA	PREDICTED: similar to Retinoid- and fatty-acid binding protein CG11064-PA isoform 1
[2]		110758758	60	19.6	6.24	6.3e-11	2158.98	720.33	3	719.711	0.62	EVLDKETVNQVGSFIQTHL	69.284	0.00015	374763	APIS MELLIFERA	PREDICTED: similar to Retinoid- and fatty-acid binding protein CG11064-PA isoform 1
[2]		110758758	60	19.6	6.24	6.3e-11	1267.59	634.3	2	634.325	-0.025	NFNFLELNTR	61.317	0.00018	374763	APIS MELLIFERA	PREDICTED: similar to Retinoid- and fatty-acid binding protein CG11064-PA isoform 1
[2]		110758758	60	19.6	6.24	6.3e-11	1249.45	625.23	2	624.843	0.39	IQATGSLTVSGSK	44.55	0.00018	374763	APIS MELLIFERA	PREDICTED: similar to Retinoid- and fatty-acid binding protein CG11064-PA isoform 1
[2]		110758758	60	19.6	6.24	6.3e-11	1105.29	553.15	2	552.789	0.36	INDMNELKK	37.792	0.00021	374763	APIS MELLIFERA	PREDICTED: similar to Retinoid- and fatty-acid binding protein CG11064-PA isoform 1
[2]		110758758	60	19.6	6.24	6.3e-11	1135.15	568.08	2	567.795	0.29	MSELREELK	44.168	0.00021	374763	APIS MELLIFERA	PREDICTED: similar to Retinoid- and fatty-acid binding protein CG11064-PA isoform 1
[2]		110758758	60	19.6	6.24	6.3e-11	2185.47	729.16	3	728.704	0.46	QFLKPDFGYNTENIAELGK	61.122	0.00023	374763	APIS MELLIFERA	PREDICTED: similar to Retinoid- and fatty-acid binding protein CG11064-PA isoform 1
[2]		110758758	60	19.6	6.24	6.3e-11	1320.19	660.6	2	660.338	0.26	EMITPLMSELR	60.733	0.00039	374763	APIS MELLIFERA	PREDICTED: similar to Retinoid- and fatty-acid binding protein CG11064-PA isoform 1
[2]		110758758	60	19.6	6.24	6.3e-11	1232.37	616.69	2	616.33	0.36	EQENSIISALK	52.678	0.00053	374763	APIS MELLIFERA	PREDICTED: similar to Retinoid- and fatty-acid binding protein CG11064-PA isoform 1
[2]		110758758	60	19.6	6.24	6.3e-11	1265.11	633.06	2	632.796	0.26	YSFNNELSYK	50.775	0.00071	374763	APIS MELLIFERA	PREDICTED: similar to Retinoid- and fatty-acid binding protein CG11064-PA isoform 1
[2]		110758758	60	19.6	6.24	6.3e-11	1123.27	562.14	2	561.793	0.35	LTDAYEAAIR	47.881	0.0008	374763	APIS MELLIFERA	PREDICTED: similar to Retinoid- and fatty-acid binding protein CG11064-PA isoform 1
[2]		110758758	60	19.6	6.24	6.3e-11	1607.65	804.33	2	803.938	0.39	SDNVYLPSVATVTLK	60.33	0.00089	374763	APIS MELLIFERA	PREDICTED: similar to Retinoid- and fatty-acid binding protein CG11064-PA isoform 1
[2]		110758758	60	19.6	6.24	6.3e-11	1862.01	621.34	3	621.031	0.31	IYSSLVAAVQSIVALAQK	81.962	0.0013	374763	APIS MELLIFERA	PREDICTED: similar to Retinoid- and fatty-acid binding protein CG11064-PA isoform 1
[2]		110758758	60	19.6	6.24	6.3e-11	1952.4	651.47	3	651.014	0.46	LELVSSLLDSDEKDLFK	68.754	0.0014	374763	APIS MELLIFERA	PREDICTED: similar to Retinoid- and fatty-acid binding protein CG11064-PA isoform 1
[2]		110758758	60	19.6	6.24	6.3e-11	1819.53	910.27	2	909.971	0.3	EMITPLMSELREELK	67.306	0.0014	374763	APIS MELLIFERA	PREDICTED: similar to Retinoid- and fatty-acid binding protein CG11064-PA isoform 1
[2]		110758758	60	19.6	6.24	6.3e-11	1328.03	664.52	2	664.352	0.17	AEVAGGVKPDAASR	27.098	0.0015	374763	APIS MELLIFERA	PREDICTED: similar to Retinoid- and fatty-acid binding protein CG11064-PA isoform 1
[2]		110758758	60	19.6	6.24	6.3e-11	1431.59	716.3	2	716.357	-0.057	VLADREEDSEIR	42.185	0.0017	374763	APIS MELLIFERA	PREDICTED: similar to Retinoid- and fatty-acid binding protein CG11064-PA isoform 1
[2]		110758758	60	19.6	6.24	6.3e-11	1474.75	737.88	2	737.897	-0.017	SREQENSIISALK	50.56	0.0023	374763	APIS MELLIFERA	PREDICTED: similar to Retinoid- and fatty-acid binding protein CG11064-PA isoform 1
[2]		110758758	60	19.6	6.24	6.3e-11	1127.23	564.12	2	563.749	0.37	NFEANDFNR	45.071	0.0029	374763	APIS MELLIFERA	PREDICTED: similar to Retinoid- and fatty-acid binding protein CG11064-PA isoform 1
[2]		110758758	60	19.6	6.24	6.3e-11	1332.55	666.78	2	666.854	-0.074	TSLSAIGDINVDK	53.564	0.0034	374763	APIS MELLIFERA	PREDICTED: similar to Retinoid- and fatty-acid binding protein CG11064-PA isoform 1
[2]		110758758	60	19.6	6.24	6.3e-11	1928.64	643.55	3	643.34	0.21	ANPCEKSPFPISLQQLR	61.498	0.0037	374763	APIS MELLIFERA	PREDICTED: similar to Retinoid- and fatty-acid binding protein CG11064-PA isoform 1
[2]		110758758	60	19.6	6.24	6.3e-11	1177.03	589.02	2	588.775	0.25	IWEKDLEED	47.321	0.0037	374763	APIS MELLIFERA	PREDICTED: similar to Retinoid- and fatty-acid binding protein CG11064-PA isoform 1
[2]		110758758	60	19.6	6.24	6.3e-11	1172.15	586.58	2	586.301	0.28	AEVAGGVKPDAAS	31.212	0.0063	374763	APIS MELLIFERA	PREDICTED: similar to Retinoid- and fatty-acid binding protein CG11064-PA isoform 1
[2]		110758758	60	19.6	6.24	6.3e-11	1120.55	560.78	2	560.793	-0.013	TYQAYIHPK	42.595	0.0067	374763	APIS MELLIFERA	PREDICTED: similar to Retinoid- and fatty-acid binding protein CG11064-PA isoform 1
[2]		110758758	60	19.6	6.24	6.3e-11	1763.94	588.65	3	588.281	0.37	FFFVHGPDPNSQTNR	52.43	0.0092	374763	APIS MELLIFERA	PREDICTED: similar to Retinoid- and fatty-acid binding protein CG11064-PA isoform 1
[2]		110758758	60	19.6	6.24	6.3e-11	1436.23	718.62	2	718.854	-0.23	GNSQFLDDATLQK	50.823	0.011	374763	APIS MELLIFERA	PREDICTED: similar to Retinoid- and fatty-acid binding protein CG11064-PA isoform 1
[2]		110758758	60	19.6	6.24	6.3e-11	1113.43	557.22	2	557.266	-0.046	NDIM(Oxidation)SVYQK	42.338	0.015	374763	APIS MELLIFERA	PREDICTED: similar to Retinoid- and fatty-acid binding protein CG11064-PA isoform 1
[2]		110758758	60	19.6	6.24	6.3e-11	1103.41	552.21	2	551.809	0.4	KEGDSLIVNK	27.121	0.018	374763	APIS MELLIFERA	PREDICTED: similar to Retinoid- and fatty-acid binding protein CG11064-PA isoform 1
[2]		110758758	60	19.6	6.24	6.3e-11	1385.65	693.33	2	693.393	-0.063	SIIFESPQPVLR	57.592	0.028	374763	APIS MELLIFERA	PREDICTED: similar to Retinoid- and fatty-acid binding protein CG11064-PA isoform 1
[2]		110758758	60	19.6	6.24	6.3e-11	2081.82	694.61	3	694.024	0.59	NNGNILVNNKPADYPAHTK	46.109	0.03	374763	APIS MELLIFERA	PREDICTED: similar to Retinoid- and fatty-acid binding protein CG11064-PA isoform 1
[2]		110758758	60	19.6	6.24	6.3e-11	1787.91	596.64	3	597.285	-0.64	RM(Oxidation)ALLLESSMQHPNM(Oxidation)	41.424	0.035	374763	APIS MELLIFERA	PREDICTED: similar to Retinoid- and fatty-acid binding protein CG11064-PA isoform 1
[2]		110758758	60	19.6	6.24	6.3e-11	1795.47	599.16	3	598.643	0.52	KDM(Oxidation)LNVISGMSQDIVK	45.17	0.046	374763	APIS MELLIFERA	PREDICTED: similar to Retinoid- and fatty-acid binding protein CG11064-PA isoform 1
[2]		110758758	60	19.6	6.24	6.3e-11	1386.33	693.67	2	692.875	0.79	KADNPTVTVSQPK	58.725	0.049	374763	APIS MELLIFERA	PREDICTED: similar to Retinoid- and fatty-acid binding protein CG11064-PA isoform 1
[3]		155369750	27	21.8	6.47	2.5e-10	1755.53	878.27	2	877.973	0.3	VIQEAQNIAIQNTQGK	48.111	2.5e-10	112189	APIS MELLIFERA	hexamerin 110
[3]		155369750	27	21.8	6.47	2.5e-10	1946.61	973.81	2	973.477	0.33	YLQQQAGQQDQQANIGR	43.77	3e-10	112189	APIS MELLIFERA	hexamerin 110
[3]		155369750	27	21.8	6.47	2.5e-10	1576.29	788.65	2	788.434	0.22	IAVHSEQNVPGAVVR	45.996	9.7e-10	112189	APIS MELLIFERA	hexamerin 110
[3]		155369750	27	21.8	6.47	2.5e-10	2294.73	1147.87	2	1147.57	0.3	SQEPFYITEPHQIFSFPAR	65.353	2.7e-09	112189	APIS MELLIFERA	hexamerin 110
[3]		155369750	27	21.8	6.47	2.5e-10	1784.39	892.7	2	891.946	0.75	LQQQAGQQDQQANIGR	40.349	3.7e-09	112189	APIS MELLIFERA	hexamerin 110
[3]		155369750	27	21.8	6.47	2.5e-10	1782.17	891.59	2	891.446	0.14	Q(Gln->pyro-Glu)PQGMNILGDLIEGTGR	73.874	6.9e-09	112189	APIS MELLIFERA	hexamerin 110
[3]		155369750	27	21.8	6.47	2.5e-10	1674.49	837.75	2	837.46	0.29	GAQYLYLHQQLLAR	54.959	3.6e-08	112189	APIS MELLIFERA	hexamerin 110
[3]		155369750	27	21.8	6.47	2.5e-10	1799.45	900.23	2	899.959	0.27	QPQGMNILGDLIEGTGR	68.874	2.3e-07	112189	APIS MELLIFERA	hexamerin 110
[3]		155369750	27	21.8	6.47	2.5e-10	1811.87	906.44	2	906.45	-0.0098	DVLVFHQGQPTNDITQ	53.763	9.1e-07	112189	APIS MELLIFERA	hexamerin 110
[3]		155369750	27	21.8	6.47	2.5e-10	1419.95	710.48	2	710.396	0.084	NQLIQYVATLEK	62.186	2.2e-06	112189	APIS MELLIFERA	hexamerin 110
[3]		155369750	27	21.8	6.47	2.5e-10	1257.51	629.26	2	629.343	-0.084	NILGDLIEGTGR	63.654	2.8e-06	112189	APIS MELLIFERA	hexamerin 110
[3]		155369750	27	21.8	6.47	2.5e-10	1321.39	661.2	2	660.861	0.34	VVSVEQYQQLK	48.715	7e-06	112189	APIS MELLIFERA	hexamerin 110
[3]		155369750	27	21.8	6.47	2.5e-10	1192.33	596.67	2	596.293	0.38	LDHQPYQYK	36.327	6.2e-05	112189	APIS MELLIFERA	hexamerin 110
[3]		155369750	27	21.8	6.47	2.5e-10	1149.65	575.33	2	575.282	0.048	NYYANLYTK	47.377	0.00014	112189	APIS MELLIFERA	hexamerin 110
[3]		155369750	27	21.8	6.47	2.5e-10	1170.63	585.82	2	585.817	0.0031	VHVNEGQFLK	46.749	0.00017	112189	APIS MELLIFERA	hexamerin 110
[3]		155369750	27	21.8	6.47	2.5e-10	1123.37	562.19	2	561.793	0.4	SVEQYQQLK	42.679	0.00018	112189	APIS MELLIFERA	hexamerin 110
[3]		155369750	27	21.8	6.47	2.5e-10	1156.29	578.65	2	578.309	0.34	SEQNVPGAVVR	42.382	0.00029	112189	APIS MELLIFERA	hexamerin 110
[3]		155369750	27	21.8	6.47	2.5e-10	2871.98	718.75	4	718.126	0.62	LSNGLGPIKDIDYENVQSLYQPHLR	63.73	0.0014	112189	APIS MELLIFERA	hexamerin 110
[3]		155369750	27	21.8	6.47	2.5e-10	1345.51	673.26	2	672.898	0.36	SLGALSVPNIFVK	65.724	0.0024	112189	APIS MELLIFERA	hexamerin 110
[3]		155369750	27	21.8	6.47	2.5e-10	1707.03	569.68	3	569.295	0.39	YITEPHQIFSFPAR	57.885	0.0053	112189	APIS MELLIFERA	hexamerin 110
[3]		155369750	27	21.8	6.47	2.5e-10	1684.31	842.66	2	842.42	0.24	DVLVFHQGQPTNDIT	54.484	0.0054	112189	APIS MELLIFERA	hexamerin 110
[3]		155369750	27	21.8	6.47	2.5e-10	1446.75	723.88	2	723.375	0.51	GMNILGDLIEGTGR	68.1	0.0071	112189	APIS MELLIFERA	hexamerin 110
[3]		155369750	27	21.8	6.47	2.5e-10	1736.25	868.63	2	868.42	0.21	SQEPFYITEPHQIF	63.264	0.0072	112189	APIS MELLIFERA	hexamerin 110
[3]		155369750	27	21.8	6.47	2.5e-10	1556.49	778.75	2	777.966	0.78	PLSLGALSVPNIFVK	61.918	0.0089	112189	APIS MELLIFERA	hexamerin 110
[3]		155369750	27	21.8	6.47	2.5e-10	2363.94	788.65	3	789.413	-0.76	Q(Gln->pyro-Glu)PYQYKIAVHSEQNVPGAVVR	45.996	0.012	112189	APIS MELLIFERA	hexamerin 110
[3]		155369750	27	21.8	6.47	2.5e-10	1143.83	572.42	2	572.309	0.11	RAADQDLLNK	30.251	0.02	112189	APIS MELLIFERA	hexamerin 110
[3]		155369750	27	21.8	6.47	2.5e-10	1981.59	661.2	3	661.665	-0.47	DQQYQVVSVEQYQQLK	48.715	0.021	112189	APIS MELLIFERA	hexamerin 110
[4]		58585104	30	20.3	5.58	9.2e-10	2492.83	1246.92	2	1246.58	0.34	VQQSMPDGWETEISDQMLELR	69.546	9.2e-10	201050	APIS MELLIFERA	vitellogenin
[4]		58585104	30	20.3	5.58	9.2e-10	1412.27	706.64	2	705.854	0.79	AQTFDGKDYPLR	46.781	8.9e-09	201050	APIS MELLIFERA	vitellogenin
[4]		58585104	30	20.3	5.58	9.2e-10	1639.31	820.16	2	819.372	0.79	TNEEMWELIDTEK	60.257	4e-08	201050	APIS MELLIFERA	vitellogenin
[4]		58585104	30	20.3	5.58	9.2e-10	2022.65	1011.83	2	1011.55	0.28	IVPEELVPLEGNLMINNK	66.356	5.9e-08	201050	APIS MELLIFERA	vitellogenin
[4]		58585104	30	20.3	5.58	9.2e-10	1634.43	817.72	2	817.443	0.28	DAITQTGTGPAFLTIK	58.493	1.1e-07	201050	APIS MELLIFERA	vitellogenin
[4]		58585104	30	20.3	5.58	9.2e-10	1525.51	763.26	2	763.393	-0.13	VEENEIIFEIYK	62.456	3.2e-07	201050	APIS MELLIFERA	vitellogenin
[4]		58585104	30	20.3	5.58	9.2e-10	1483.33	742.17	2	741.847	0.32	IYNNPFSDVEER	53.746	3.8e-07	201050	APIS MELLIFERA	vitellogenin
[4]		58585104	30	20.3	5.58	9.2e-10	1836.63	918.82	2	918.462	0.36	FVPGTTSQPEVFVNGEK	52.482	5.5e-07	201050	APIS MELLIFERA	vitellogenin
[4]		58585104	30	20.3	5.58	9.2e-10	1223.41	612.21	2	611.827	0.38	SFFELLQNPK	62.691	7.1e-07	201050	APIS MELLIFERA	vitellogenin
[4]		58585104	30	20.3	5.58	9.2e-10	1211.63	606.32	2	606.339	-0.019	SPELVPMPTLK	57.289	3.2e-06	201050	APIS MELLIFERA	vitellogenin
[4]		58585104	30	20.3	5.58	9.2e-10	1422.41	711.71	2	711.33	0.38	LPYPWTMDNER	56.676	7.5e-06	201050	APIS MELLIFERA	vitellogenin
[4]		58585104	30	20.3	5.58	9.2e-10	1439.15	720.08	2	719.327	0.75	LPYPWTM(Oxidation)DNER	52.84	7.6e-06	201050	APIS MELLIFERA	vitellogenin
[4]		58585104	30	20.3	5.58	9.2e-10	1461.27	731.14	2	730.922	0.22	LPTLISNYIEAVK	66.24	1.8e-05	201050	APIS MELLIFERA	vitellogenin
[4]		58585104	30	20.3	5.58	9.2e-10	2169.24	723.75	3	723.677	0.074	DFQHNWQVGNEYTYLVR	61.028	2.1e-05	201050	APIS MELLIFERA	vitellogenin
[4]		58585104	30	20.3	5.58	9.2e-10	1221.99	611.5	2	611.309	0.19	YVGSEDSVIPR	47.142	5.8e-05	201050	APIS MELLIFERA	vitellogenin
[4]		58585104	30	20.3	5.58	9.2e-10	1371.45	686.23	2	685.893	0.34	DLPISGKPFQIR	55.428	7e-05	201050	APIS MELLIFERA	vitellogenin
[4]		58585104	30	20.3	5.58	9.2e-10	3738.75	1246.92	3	1246.27	0.65	AAKVWNGQYARVQQSMPDGWETEISDQMLELR	69.546	8.5e-05	201050	APIS MELLIFERA	vitellogenin
[4]		58585104	30	20.3	5.58	9.2e-10	1778.22	593.41	3	592.946	0.46	VMTRPDTDSENWTPK	46.916	8.8e-05	201050	APIS MELLIFERA	vitellogenin
[4]		58585104	30	20.3	5.58	9.2e-10	1336.25	668.63	2	668.349	0.28	HFTIQSSVTTSK	45.054	0.00018	201050	APIS MELLIFERA	vitellogenin
[4]		58585104	30	20.3	5.58	9.2e-10	1189.15	595.08	2	594.812	0.27	VGFVTPFEHR	52.19	0.00038	201050	APIS MELLIFERA	vitellogenin
[4]		58585104	30	20.3	5.58	9.2e-10	1233.31	617.16	2	616.828	0.33	DRETIISAAEK	43.8	0.00038	201050	APIS MELLIFERA	vitellogenin
[4]		58585104	30	20.3	5.58	9.2e-10	1665.35	833.18	2	832.941	0.24	IQTYIMALGMIGEPK	66.164	0.00065	201050	APIS MELLIFERA	vitellogenin
[4]		58585104	30	20.3	5.58	9.2e-10	1182.15	591.58	2	591.288	0.29	SIHNNYPVHT	38.487	0.00092	201050	APIS MELLIFERA	vitellogenin
[4]		58585104	30	20.3	5.58	9.2e-10	1313.41	657.21	2	657.359	-0.15	DVPTWEVNILK	61.354	0.0012	201050	APIS MELLIFERA	vitellogenin
[4]		58585104	30	20.3	5.58	9.2e-10	1828.05	610.02	3	609.321	0.7	GTRPMIPDDNTSLALPK	54	0.0015	201050	APIS MELLIFERA	vitellogenin
[4]		58585104	30	20.3	5.58	9.2e-10	3033.48	1011.83	3	1011.89	-0.06	AEKIAEELKIVPEELVPLEGNLMINNK	66.356	0.0041	201050	APIS MELLIFERA	vitellogenin
[4]		58585104	30	20.3	5.58	9.2e-10	1156.91	578.96	2	578.811	0.15	TNPPLSMLQR	51.639	0.0084	201050	APIS MELLIFERA	vitellogenin
[4]		58585104	30	20.3	5.58	9.2e-10	1176.29	588.65	2	588.312	0.34	IMALGM(Oxidation)IGEPK	52.43	0.011	201050	APIS MELLIFERA	vitellogenin
[4]		58585104	30	20.3	5.58	9.2e-10	2596.86	649.97	4	650.082	-0.11	SESLKHFTIQSSVTTSKMM(Oxidation)VSPR	56.651	0.025	201050	APIS MELLIFERA	vitellogenin
[4]		58585104	30	20.3	5.58	9.2e-10	3342.1	836.28	4	835.638	0.64	VMTRPDTDSENW(Oxidation)TPKMM(Oxidation)AVEPTDKQANSK	110.352	0.049	201050	APIS MELLIFERA	vitellogenin
[5]		58585146	20	43.7	6.94	5.3e-12	2382.71	1191.86	2	1191.07	0.79	DFGDVDSLGNLDPANEFIVSTR	68.525	5.3e-12	40008.7	APIS MELLIFERA	arginine kinase
[5]		58585146	20	43.7	6.94	5.3e-12	1720.47	860.74	2	860.395	0.35	GEHTEAEGGIYDISNK	45.892	2.1e-11	40008.7	APIS MELLIFERA	arginine kinase
[5]		58585146	20	43.7	6.94	5.3e-12	1668.31	834.66	2	834.416	0.24	IISMQMGGDLGQVYR	58.399	2e-09	40008.7	APIS MELLIFERA	arginine kinase
[5]		58585146	20	43.7	6.94	5.3e-12	1390.59	695.8	2	695.836	-0.036	DPIIEDYHGGFK	50.644	2.2e-09	40008.7	APIS MELLIFERA	arginine kinase
[5]		58585146	20	43.7	6.94	5.3e-12	1202.19	601.6	2	601.3	0.3	GTFYPLTGMSK	54.191	2.5e-08	40008.7	APIS MELLIFERA	arginine kinase
[5]		58585146	20	43.7	6.94	5.3e-12	1122.17	561.59	2	561.314	0.28	LGLTEYQAVK	49.482	5.1e-08	40008.7	APIS MELLIFERA	arginine kinase
[5]		58585146	20	43.7	6.94	5.3e-12	1823.55	912.28	2	911.966	0.31	Acetyl-MVDQAVLDKLETGFSK	69.478	7.6e-08	40008.7	APIS MELLIFERA	arginine kinase
[5]		58585146	20	43.7	6.94	5.3e-12	1684.45	842.73	2	842.413	0.32	IISMQM(Oxidation)GGDLGQVYR	53.662	7.9e-08	40008.7	APIS MELLIFERA	arginine kinase
[5]		58585146	20	43.7	6.94	5.3e-12	1692.37	846.69	2	846.446	0.24	M(Met-loss+Acetyl)VDQAVLDKLETGFSK	71.029	8.3e-07	40008.7	APIS MELLIFERA	arginine kinase
[5]		58585146	20	43.7	6.94	5.3e-12	1217.85	609.43	2	609.297	0.13	GTFYPLTGM(Oxidation)SK	49.207	1.3e-05	40008.7	APIS MELLIFERA	arginine kinase
[5]		58585146	20	43.7	6.94	5.3e-12	1563.77	782.39	2	782.399	-0.0087	M(Met-loss+Acetyl)VDQAVLDKLETGFS	70.668	1.5e-05	40008.7	APIS MELLIFERA	arginine kinase
[5]		58585146	20	43.7	6.94	5.3e-12	1320.53	660.77	2	660.356	0.41	VSSTLSGLEGELK	56.428	2.5e-05	40008.7	APIS MELLIFERA	arginine kinase
[5]		58585146	20	43.7	6.94	5.3e-12	1148.33	574.67	2	574.311	0.36	LIDDHFLFK	56.758	7.8e-05	40008.7	APIS MELLIFERA	arginine kinase
[5]		58585146	20	43.7	6.94	5.3e-12	1256.35	628.68	2	628.321	0.36	EMHDGIAELIK	52.315	0.00017	40008.7	APIS MELLIFERA	arginine kinase
[5]		58585146	20	43.7	6.94	5.3e-12	1700.53	850.77	2	850.411	0.36	IISM(Oxidation)QM(Oxidation)GGDLGQVYR	49.121	0.00017	40008.7	APIS MELLIFERA	arginine kinase
[5]		58585146	20	43.7	6.94	5.3e-12	2035.11	679.04	3	678.656	0.38	GTRGEHTEAEGGIYDISNK	44.713	0.00019	40008.7	APIS MELLIFERA	arginine kinase
[5]		58585146	20	43.7	6.94	5.3e-12	1152.09	576.55	2	576.325	0.23	LVHAVNEIEK	42.741	0.00057	40008.7	APIS MELLIFERA	arginine kinase
[5]		58585146	20	43.7	6.94	5.3e-12	1278.31	639.66	2	639.364	0.3	RLGLTEYQAVK	47.206	0.00078	40008.7	APIS MELLIFERA	arginine kinase
[5]		58585146	20	43.7	6.94	5.3e-12	1308.33	654.67	2	654.375	0.29	LVHAVNEIEKR	42.265	0.00092	40008.7	APIS MELLIFERA	arginine kinase
[5]		58585146	20	43.7	6.94	5.3e-12	1982.97	661.66	3	661.326	0.33	EM(Oxidation)EEKVSSTLSGLEGELK	55.709	0.0061	40008.7	APIS MELLIFERA	arginine kinase
[6]		66547450	17	27	6.75	3.9e-11	1558.31	779.66	2	778.921	0.74	GVDILADAVAVTMGPK	68.896	3.9e-11	60413	APIS MELLIFERA	PREDICTED: similar to 60 kDa heat shock protein, mitochondrial precursor (Hsp60) (60 kDa chaperonin) (CPN60) (Heat shock protein 60) (HSP-60) (Mitochondrial matrix protein P1)
[6]		66547450	17	27	6.75	3.9e-11	2360.49	1180.75	2	1180.53	0.22	VSDGNLGYDALNDEYVDMIEK	63.772	5e-11	60413	APIS MELLIFERA	PREDICTED: similar to 60 kDa heat shock protein, mitochondrial precursor (Hsp60) (60 kDa chaperonin) (CPN60) (Heat shock protein 60) (HSP-60) (Mitochondrial matrix protein P1)
[6]		66547450	17	27	6.75	3.9e-11	1514.31	757.66	2	757.382	0.28	TLHDELEVIEGMK	60.093	2.2e-10	60413	APIS MELLIFERA	PREDICTED: similar to 60 kDa heat shock protein, mitochondrial precursor (Hsp60) (60 kDa chaperonin) (CPN60) (Heat shock protein 60) (HSP-60) (Mitochondrial matrix protein P1)
[6]		66547450	17	27	6.75	3.9e-11	1669.23	835.12	2	834.437	0.68	Q(Gln->pyro-Glu)GVDILADAVAVTMGPK	75.153	3.8e-09	60413	APIS MELLIFERA	PREDICTED: similar to 60 kDa heat shock protein, mitochondrial precursor (Hsp60) (60 kDa chaperonin) (CPN60) (Heat shock protein 60) (HSP-60) (Mitochondrial matrix protein P1)
[6]		66547450	17	27	6.75	3.9e-11	1540.29	770.65	2	769.909	0.74	VEFQDALLLFSEK	69.816	8.1e-09	60413	APIS MELLIFERA	PREDICTED: similar to 60 kDa heat shock protein, mitochondrial precursor (Hsp60) (60 kDa chaperonin) (CPN60) (Heat shock protein 60) (HSP-60) (Mitochondrial matrix protein P1)
[6]		66547450	17	27	6.75	3.9e-11	1685.23	843.12	2	842.951	0.17	QGVDILADAVAVTMGPK	69.425	2e-08	60413	APIS MELLIFERA	PREDICTED: similar to 60 kDa heat shock protein, mitochondrial precursor (Hsp60) (60 kDa chaperonin) (CPN60) (Heat shock protein 60) (HSP-60) (Mitochondrial matrix protein P1)
[6]		66547450	17	27	6.75	3.9e-11	1133.05	567.03	2	566.805	0.22	AIGNLISDAMK	57.579	1.9e-07	60413	APIS MELLIFERA	PREDICTED: similar to 60 kDa heat shock protein, mitochondrial precursor (Hsp60) (60 kDa chaperonin) (CPN60) (Heat shock protein 60) (HSP-60) (Mitochondrial matrix protein P1)
[6]		66547450	17	27	6.75	3.9e-11	1375.99	688.5	2	688.348	0.15	GYISPYFINSSK	54.746	2.6e-07	60413	APIS MELLIFERA	PREDICTED: similar to 60 kDa heat shock protein, mitochondrial precursor (Hsp60) (60 kDa chaperonin) (CPN60) (Heat shock protein 60) (HSP-60) (Mitochondrial matrix protein P1)
[6]		66547450	17	27	6.75	3.9e-11	1357.97	679.49	2	679.359	0.13	NVILEQSWGSPK	52.454	2.9e-07	60413	APIS MELLIFERA	PREDICTED: similar to 60 kDa heat shock protein, mitochondrial precursor (Hsp60) (60 kDa chaperonin) (CPN60) (Heat shock protein 60) (HSP-60) (Mitochondrial matrix protein P1)
[6]		66547450	17	27	6.75	3.9e-11	1234.15	617.58	2	617.302	0.28	VGGSSEVEVNEK	29.824	4.9e-07	60413	APIS MELLIFERA	PREDICTED: similar to 60 kDa heat shock protein, mitochondrial precursor (Hsp60) (60 kDa chaperonin) (CPN60) (Heat shock protein 60) (HSP-60) (Mitochondrial matrix protein P1)
[6]		66547450	17	27	6.75	3.9e-11	1642.39	821.7	2	821.384	0.32	DQIANTTSDYEKEK	43.255	4.9e-07	60413	APIS MELLIFERA	PREDICTED: similar to 60 kDa heat shock protein, mitochondrial precursor (Hsp60) (60 kDa chaperonin) (CPN60) (Heat shock protein 60) (HSP-60) (Mitochondrial matrix protein P1)
[6]		66547450	17	27	6.75	3.9e-11	1384.99	693	2	692.815	0.19	DQIANTTSDYEK	42.622	2.1e-05	60413	APIS MELLIFERA	PREDICTED: similar to 60 kDa heat shock protein, mitochondrial precursor (Hsp60) (60 kDa chaperonin) (CPN60) (Heat shock protein 60) (HSP-60) (Mitochondrial matrix protein P1)
[6]		66547450	17	27	6.75	3.9e-11	1610.37	805.69	2	805.449	0.24	AAVEEGIVPGGGTALLR	56.786	0.00015	60413	APIS MELLIFERA	PREDICTED: similar to 60 kDa heat shock protein, mitochondrial precursor (Hsp60) (60 kDa chaperonin) (CPN60) (Heat shock protein 60) (HSP-60) (Mitochondrial matrix protein P1)
[6]		66547450	17	27	6.75	3.9e-11	2197.65	733.22	3	732.697	0.52	ADVIRDQIANTTSDYEKEK	50.615	0.00057	60413	APIS MELLIFERA	PREDICTED: similar to 60 kDa heat shock protein, mitochondrial precursor (Hsp60) (60 kDa chaperonin) (CPN60) (Heat shock protein 60) (HSP-60) (Mitochondrial matrix protein P1)
[6]		66547450	17	27	6.75	3.9e-11	2130.12	710.71	3	710.383	0.33	ALMLQGVDILADAVAVTM(Oxidation)GPK	75.579	0.0021	60413	APIS MELLIFERA	PREDICTED: similar to 60 kDa heat shock protein, mitochondrial precursor (Hsp60) (60 kDa chaperonin) (CPN60) (Heat shock protein 60) (HSP-60) (Mitochondrial matrix protein P1)
[6]		66547450	17	27	6.75	3.9e-11	2145.39	715.8	3	715.715	0.085	ALM(Oxidation)LQGVDILADAVAVTM(Oxidation)GPK	72.885	0.017	60413	APIS MELLIFERA	PREDICTED: similar to 60 kDa heat shock protein, mitochondrial precursor (Hsp60) (60 kDa chaperonin) (CPN60) (Heat shock protein 60) (HSP-60) (Mitochondrial matrix protein P1)
[6]		66547450	17	27	6.75	3.9e-11	3151.54	788.64	4	788.664	-0.024	GYISPYFINSSKGAKVEFQDALLLFSEK	47.595	0.034	60413	APIS MELLIFERA	PREDICTED: similar to 60 kDa heat shock protein, mitochondrial precursor (Hsp60) (60 kDa chaperonin) (CPN60) (Heat shock protein 60) (HSP-60) (Mitochondrial matrix protein P1)
[7]		66513649	19	8.5	4.92	1.1e-08	1460.25	730.63	2	730.417	0.21	LLDSLQVQQLFR	65.516	1.1e-08	278414	APIS MELLIFERA	PREDICTED: similar to Spectrin alpha chain
[7]		66513649	19	8.5	4.92	1.1e-08	1556.65	778.83	2	778.404	0.43	LDESLTYQQFLAK	58.272	4e-08	278414	APIS MELLIFERA	PREDICTED: similar to Spectrin alpha chain
[7]		66513649	19	8.5	4.92	1.1e-08	1477.41	739.21	2	738.863	0.35	LQEASQQQQFNR	40.878	1.5e-07	278414	APIS MELLIFERA	PREDICTED: similar to Spectrin alpha chain
[7]		66513649	19	8.5	4.92	1.1e-08	1267.11	634.06	2	633.784	0.28	DLVSWMNDMR	64.789	2.8e-07	278414	APIS MELLIFERA	PREDICTED: similar to Spectrin alpha chain
[7]		66513649	19	8.5	4.92	1.1e-08	1210.19	605.6	2	605.291	0.31	DVVLSSDDFGR	50.718	9.6e-07	278414	APIS MELLIFERA	PREDICTED: similar to Spectrin alpha chain
[7]		66513649	19	8.5	4.92	1.1e-08	1219.41	610.21	2	609.851	0.36	DLSTVQTLLTK	58.791	1.4e-06	278414	APIS MELLIFERA	PREDICTED: similar to Spectrin alpha chain
[7]		66513649	19	8.5	4.92	1.1e-08	1266.17	633.59	2	633.277	0.31	DTEQADAWMAK	46.944	3.9e-06	278414	APIS MELLIFERA	PREDICTED: similar to Spectrin alpha chain
[7]		66513649	19	8.5	4.92	1.1e-08	1305.33	653.17	2	652.843	0.33	YAALQQPMNIR	50.525	2e-05	278414	APIS MELLIFERA	PREDICTED: similar to Spectrin alpha chain
[7]		66513649	19	8.5	4.92	1.1e-08	1186.25	593.63	2	593.335	0.3	LLNQAWAELK	56.977	2.5e-05	278414	APIS MELLIFERA	PREDICTED: similar to Spectrin alpha chain
[7]		66513649	19	8.5	4.92	1.1e-08	1103.69	552.35	2	552.259	0.091	SGHFDADNIK	34.397	3.6e-05	278414	APIS MELLIFERA	PREDICTED: similar to Spectrin alpha chain
[7]		66513649	19	8.5	4.92	1.1e-08	1146.13	573.57	2	573.312	0.26	DLTSVQNLQK	46.712	3.7e-05	278414	APIS MELLIFERA	PREDICTED: similar to Spectrin alpha chain
[7]		66513649	19	8.5	4.92	1.1e-08	1687.53	563.18	3	562.941	0.24	LIEGEHYAADDVAQR	45.765	0.00013	278414	APIS MELLIFERA	PREDICTED: similar to Spectrin alpha chain
[7]		66513649	19	8.5	4.92	1.1e-08	1147.97	574.49	2	574.283	0.21	NQSGVSEDALK	37.77	0.00019	278414	APIS MELLIFERA	PREDICTED: similar to Spectrin alpha chain
[7]		66513649	19	8.5	4.92	1.1e-08	1356.67	678.84	2	678.344	0.5	ILENPEDIQER	47.392	0.0005	278414	APIS MELLIFERA	PREDICTED: similar to Spectrin alpha chain
[7]		66513649	19	8.5	4.92	1.1e-08	1131.21	566.11	2	565.814	0.3	QSLLNLWEK	60.818	0.00072	278414	APIS MELLIFERA	PREDICTED: similar to Spectrin alpha chain
[7]		66513649	19	8.5	4.92	1.1e-08	1117.71	559.36	2	559.29	0.07	VTEVNELADK	43.674	0.00076	278414	APIS MELLIFERA	PREDICTED: similar to Spectrin alpha chain
[7]		66513649	19	8.5	4.92	1.1e-08	1128.35	564.68	2	564.325	0.36	DLIGVQNLQK	51.321	0.0027	278414	APIS MELLIFERA	PREDICTED: similar to Spectrin alpha chain
[7]		66513649	19	8.5	4.92	1.1e-08	1275.47	638.24	2	638.296	-0.056	DIEDEEAWIR	54.632	0.0063	278414	APIS MELLIFERA	PREDICTED: similar to Spectrin alpha chain
[7]		66513649	19	8.5	4.92	1.1e-08	1196.15	598.58	2	598.291	0.29	LDESYYLHR	46.764	0.021	278414	APIS MELLIFERA	PREDICTED: similar to Spectrin alpha chain
[8]		58585154	15	44.3	5.41	3.9e-09	1513.29	757.15	2	756.463	0.69	VLTTGLPALISWIK	97.081	3.9e-09	7584.9	APIS MELLIFERA	melittin precursor
[8]		58585154	15	44.3	5.41	3.9e-09	1544.37	772.69	2	772.458	0.23	VLTTGLPALISW(Dioxidation)IK	75.692	1.4e-08	7584.9	APIS MELLIFERA	melittin precursor
[8]		58585154	15	44.3	5.41	3.9e-09	1668.47	834.74	2	834.514	0.23	VLTTGLPALISWIKR	72.571	1.9e-08	7584.9	APIS MELLIFERA	melittin precursor
[8]		58585154	15	44.3	5.41	3.9e-09	1527.59	764.3	2	764.461	-0.16	VLTTGLPALISW(Oxidation)IK	67.628	4.9e-08	7584.9	APIS MELLIFERA	melittin precursor
[8]		58585154	15	44.3	5.41	3.9e-09	1199.75	600.38	2	599.863	0.52	TGLPALISWIK	69.666	1.9e-07	7584.9	APIS MELLIFERA	melittin precursor
[8]		58585154	15	44.3	5.41	3.9e-09	1341.65	671.33	2	670.856	0.47	AEADPEAGIGAVLK	54.468	5.5e-07	7584.9	APIS MELLIFERA	melittin precursor
[8]		58585154	15	44.3	5.41	3.9e-09	1301.23	651.12	2	650.387	0.73	TTGLPALISWIK	72.527	2.5e-06	7584.9	APIS MELLIFERA	melittin precursor
[8]		58585154	15	44.3	5.41	3.9e-09	1700.31	850.66	2	850.509	0.15	VLTTGLPALISW(Dioxidation)IKR	70.414	3.7e-06	7584.9	APIS MELLIFERA	melittin precursor
[8]		58585154	15	44.3	5.41	3.9e-09	1445.47	723.24	2	722.924	0.32	LTTGLPALISW(Dioxidation)IK	72.833	4.6e-06	7584.9	APIS MELLIFERA	melittin precursor
[8]		58585154	15	44.3	5.41	3.9e-09	1413.33	707.17	2	706.929	0.24	LTTGLPALISWIK	73.247	9.5e-06	7584.9	APIS MELLIFERA	melittin precursor
[8]		58585154	15	44.3	5.41	3.9e-09	1332.57	666.79	2	666.382	0.41	TTGLPALISW(Dioxidation)IK	70.217	2.6e-05	7584.9	APIS MELLIFERA	melittin precursor
[8]		58585154	15	44.3	5.41	3.9e-09	1142.11	571.56	2	570.817	0.74	ADPEAGIGAVLK	52.749	3.7e-05	7584.9	APIS MELLIFERA	melittin precursor
[8]		58585154	15	44.3	5.41	3.9e-09	2505.42	835.81	3	836.176	-0.37	EAGIGAVLKVLTTGLPALISWIKR	70.915	0.00011	7584.9	APIS MELLIFERA	melittin precursor
[8]		58585154	15	44.3	5.41	3.9e-09	1272.23	636.62	2	635.874	0.75	VLTTGLPALISW	72.406	0.00018	7584.9	APIS MELLIFERA	melittin precursor
[8]		58585154	15	44.3	5.41	3.9e-09	3022.74	756.44	4	755.673	0.77	ADAEADPEAGIGAVLKVLTTGLPALISWIK	97.201	0.012	7584.9	APIS MELLIFERA	melittin precursor
[9]		66521738	13	33.5	5.72	5.1e-09	1440.29	720.65	2	720.391	0.26	SGQVVPGYGHAVLR	47.562	5.1e-09	51930.5	APIS MELLIFERA	PREDICTED: similar to lethal (1) G0030 CG3861-PA, isoform A
[9]		66521738	13	33.5	5.72	5.1e-09	1712.37	856.69	2	856.422	0.27	MLGYEDPQFTELLR	65.207	1e-08	51930.5	APIS MELLIFERA	PREDICTED: similar to lethal (1) G0030 CG3861-PA, isoform A
[9]		66521738	13	33.5	5.72	5.1e-09	1104.09	552.55	2	551.835	0.72	LPSVAAIIYR	59.831	3.8e-07	51930.5	APIS MELLIFERA	PREDICTED: similar to lethal (1) G0030 CG3861-PA, isoform A
[9]		66521738	13	33.5	5.72	5.1e-09	1289.23	645.12	2	644.375	0.75	ALGVLSSLVWSR	65.974	4.1e-07	51930.5	APIS MELLIFERA	PREDICTED: similar to lethal (1) G0030 CG3861-PA, isoform A
[9]		66521738	13	33.5	5.72	5.1e-09	1811.41	906.21	2	905.473	0.74	GLLWEPSVLDPEEGIR	66.727	5.5e-07	51930.5	APIS MELLIFERA	PREDICTED: similar to lethal (1) G0030 CG3861-PA, isoform A
[9]		66521738	13	33.5	5.72	5.1e-09	1370.25	685.63	2	685.377	0.25	WLLITGDVPNNK	58.807	1.6e-05	51930.5	APIS MELLIFERA	PREDICTED: similar to lethal (1) G0030 CG3861-PA, isoform A
[9]		66521738	13	33.5	5.72	5.1e-09	1340.59	670.8	2	670.838	-0.038	EPSVLDPEEGIR	51.477	3.4e-05	51930.5	APIS MELLIFERA	PREDICTED: similar to lethal (1) G0030 CG3861-PA, isoform A
[9]		66521738	13	33.5	5.72	5.1e-09	1376.09	688.55	2	688.315	0.24	EIGDSPSDEKVAE	42.953	0.00054	51930.5	APIS MELLIFERA	PREDICTED: similar to lethal (1) G0030 CG3861-PA, isoform A
[9]		66521738	13	33.5	5.72	5.1e-09	1114.29	557.65	2	557.324	0.33	GLGFPIERPK	50.472	0.001	51930.5	APIS MELLIFERA	PREDICTED: similar to lethal (1) G0030 CG3861-PA, isoform A
[9]		66521738	13	33.5	5.72	5.1e-09	1185.21	593.11	2	592.338	0.77	LLITGDVPNNK	48.624	0.0014	51930.5	APIS MELLIFERA	PREDICTED: similar to lethal (1) G0030 CG3861-PA, isoform A
[9]		66521738	13	33.5	5.72	5.1e-09	1609.27	805.14	2	804.928	0.21	SAAITILNSESEFVK	60.16	0.0021	51930.5	APIS MELLIFERA	PREDICTED: similar to lethal (1) G0030 CG3861-PA, isoform A
[9]		66521738	13	33.5	5.72	5.1e-09	3423.74	856.69	4	857.149	-0.46	SVDSSKDW(Oxidation)AW(Dioxidation)NFSRMLGYEDPQFTELLR	65.207	0.0031	51930.5	APIS MELLIFERA	PREDICTED: similar to lethal (1) G0030 CG3861-PA, isoform A
[9]		66521738	13	33.5	5.72	5.1e-09	2920.92	974.31	3	974.802	-0.49	VKNPW(Oxidation)PNVDAHSGVLLQYYGMKEM(Oxidation)N	98.938	0.042	51930.5	APIS MELLIFERA	PREDICTED: similar to lethal (1) G0030 CG3861-PA, isoform A
[10]		66517710	14	14	5.94	7.9e-10	1573.37	787.19	2	786.941	0.25	IVQAPDGYIIGITGR	58.834	7.9e-10	161988	APIS MELLIFERA	PREDICTED: similar to tripeptidyl peptidase II
[10]		66517710	14	14	5.94	7.9e-10	1303.19	652.1	2	651.784	0.32	MPGMSYTWSSR	52.284	1.8e-07	161988	APIS MELLIFERA	PREDICTED: similar to tripeptidyl peptidase II
[10]		66517710	14	14	5.94	7.9e-10	1261.39	631.2	2	630.829	0.37	IGELMNEVIDK	54.926	8.2e-06	161988	APIS MELLIFERA	PREDICTED: similar to tripeptidyl peptidase II
[10]		66517710	14	14	5.94	7.9e-10	1316.23	658.62	2	658.358	0.26	LTEMPFLLSHK	57.065	2.3e-05	161988	APIS MELLIFERA	PREDICTED: similar to tripeptidyl peptidase II
[10]		66517710	14	14	5.94	7.9e-10	1235.07	618.04	2	617.827	0.21	IGTMETGTAVVR	46.076	3e-05	161988	APIS MELLIFERA	PREDICTED: similar to tripeptidyl peptidase II
[10]		66517710	14	14	5.94	7.9e-10	1330.63	665.82	2	665.87	-0.05	SSVQILKPTDSR	44.31	0.00011	161988	APIS MELLIFERA	PREDICTED: similar to tripeptidyl peptidase II
[10]		66517710	14	14	5.94	7.9e-10	1897.14	633.05	3	632.664	0.39	VPSNWVNPSGQYHIGIK	55.388	0.00012	161988	APIS MELLIFERA	PREDICTED: similar to tripeptidyl peptidase II
[10]		66517710	14	14	5.94	7.9e-10	1116.35	558.68	2	558.798	-0.12	LEKEELEAR	27.657	0.00051	161988	APIS MELLIFERA	PREDICTED: similar to tripeptidyl peptidase II
[10]		66517710	14	14	5.94	7.9e-10	1195.37	598.19	2	598.273	-0.083	WDEYNEALR	48.35	0.00081	161988	APIS MELLIFERA	PREDICTED: similar to tripeptidyl peptidase II
[10]		66517710	14	14	5.94	7.9e-10	1148.99	575	2	574.801	0.2	YIAPISNENK	42.639	0.003	161988	APIS MELLIFERA	PREDICTED: similar to tripeptidyl peptidase II
[10]		66517710	14	14	5.94	7.9e-10	1303.99	652.5	2	651.84	0.66	AMLISLDSPEAR	67.261	0.004	161988	APIS MELLIFERA	PREDICTED: similar to tripeptidyl peptidase II
[10]		66517710	14	14	5.94	7.9e-10	2366.9	592.48	4	591.79	0.69	QSYEHLLDSVTHHWQEVQK	75.264	0.011	161988	APIS MELLIFERA	PREDICTED: similar to tripeptidyl peptidase II
[10]		66517710	14	14	5.94	7.9e-10	1747.38	583.13	3	582.615	0.51	KSQLM(Oxidation)NGTSMAAPHVTG	103.863	0.038	161988	APIS MELLIFERA	PREDICTED: similar to tripeptidyl peptidase II
[10]		66517710	14	14	5.94	7.9e-10	4196.97	1399.66	3	1399.37	0.29	HVPHDDISEESVSLANQIISVADAVITNIDQDKLLAYY	56.017	0.04	161988	APIS MELLIFERA	PREDICTED: similar to tripeptidyl peptidase II
[11]		66557932	12	15.2	6.57	2.4e-11	1674.15	837.58	2	836.902	0.68	FFNDGDYIQAVIDR	63.447	2.4e-11	97330	APIS MELLIFERA	PREDICTED: similar to Glycogen phosphorylase isoform 2
[11]		66557932	12	15.2	6.57	2.4e-11	1535.11	768.06	2	767.39	0.67	WIEMAINNIASSGK	59.281	2.1e-09	97330	APIS MELLIFERA	PREDICTED: similar to Glycogen phosphorylase isoform 2
[11]		66557932	12	15.2	6.57	2.4e-11	1332.27	666.64	2	665.872	0.77	VNPASIFDIQVK	62.933	5.2e-07	97330	APIS MELLIFERA	PREDICTED: similar to Glycogen phosphorylase isoform 2
[11]		66557932	12	15.2	6.57	2.4e-11	1430.17	715.59	2	715.379	0.21	WPTSMLESILPR	69.74	2.6e-06	97330	APIS MELLIFERA	PREDICTED: similar to Glycogen phosphorylase isoform 2
[11]		66557932	12	15.2	6.57	2.4e-11	1412.47	706.74	2	706.395	0.34	ILIDVEGLPWEK	66.26	4.2e-06	97330	APIS MELLIFERA	PREDICTED: similar to Glycogen phosphorylase isoform 2
[11]		66557932	12	15.2	6.57	2.4e-11	1386.95	693.98	2	693.844	0.14	EIWGVEPSWQR	56.945	1.5e-05	97330	APIS MELLIFERA	PREDICTED: similar to Glycogen phosphorylase isoform 2
[11]		66557932	12	15.2	6.57	2.4e-11	1855.38	619.13	3	618.663	0.47	IGSDWTVHLEQLSQLK	63.563	0.00011	97330	APIS MELLIFERA	PREDICTED: similar to Glycogen phosphorylase isoform 2
[11]		66557932	12	15.2	6.57	2.4e-11	1189.45	595.23	2	595.307	-0.077	SLIEEEGEKR	38.292	0.00048	97330	APIS MELLIFERA	PREDICTED: similar to Glycogen phosphorylase isoform 2
[11]		66557932	12	15.2	6.57	2.4e-11	1443.23	722.12	2	721.851	0.27	VLYPNDNFFEGK	56.549	0.00059	97330	APIS MELLIFERA	PREDICTED: similar to Glycogen phosphorylase isoform 2
[11]		66557932	12	15.2	6.57	2.4e-11	1320.51	660.76	2	660.827	-0.067	MSLIEEEGEKR	45.149	0.0015	97330	APIS MELLIFERA	PREDICTED: similar to Glycogen phosphorylase isoform 2
[11]		66557932	12	15.2	6.57	2.4e-11	2302.17	768.06	3	767.367	0.69	YQDESKW(Oxidation)IEMAINNIASSGK	59.281	0.003	97330	APIS MELLIFERA	PREDICTED: similar to Glycogen phosphorylase isoform 2
[11]		66557932	12	15.2	6.57	2.4e-11	1123.29	562.15	2	561.759	0.39	TQQYYYEK	28.019	0.019	97330	APIS MELLIFERA	PREDICTED: similar to Glycogen phosphorylase isoform 2
[12]		94158854	11	20.1	5.5	7.5e-10	1486.17	743.59	2	743.33	0.26	SFMDSNSDGIGDLK	53.984	7.5e-10	67357.8	APIS MELLIFERA	alpha glucosidase 2
[12]		94158854	11	20.1	5.5	7.5e-10	1711.45	856.23	2	856.407	-0.18	TPFQWDNSINAGFSK	59.724	2.4e-09	67357.8	APIS MELLIFERA	alpha glucosidase 2
[12]		94158854	11	20.1	5.5	7.5e-10	1272.25	636.63	2	635.833	0.8	NAIFYQVYPR	54.858	2.1e-07	67357.8	APIS MELLIFERA	alpha glucosidase 2
[12]		94158854	11	20.1	5.5	7.5e-10	1565.19	783.1	2	782.378	0.72	YYEVGSNVPFNFK	58.61	1.1e-06	67357.8	APIS MELLIFERA	alpha glucosidase 2
[12]		94158854	11	20.1	5.5	7.5e-10	1500.27	750.64	2	750.342	0.3	DFVDNYAEENKR	45.868	1.7e-06	67357.8	APIS MELLIFERA	alpha glucosidase 2
[12]		94158854	11	20.1	5.5	7.5e-10	1104.93	552.97	2	552.775	0.2	DLEDLTAEAK	49.575	4.7e-06	67357.8	APIS MELLIFERA	alpha glucosidase 2
[12]		94158854	11	20.1	5.5	7.5e-10	1291.27	646.14	2	645.801	0.34	Q(Gln->pyro-Glu)FYFHQFYK	60.273	5.3e-05	67357.8	APIS MELLIFERA	alpha glucosidase 2
[12]		94158854	11	20.1	5.5	7.5e-10	1146.09	573.55	2	573.312	0.24	SGLNLEQEKK	29.703	0.00073	67357.8	APIS MELLIFERA	alpha glucosidase 2
[12]		94158854	11	20.1	5.5	7.5e-10	2347.29	783.1	3	783.73	-0.63	SLENTLKYYEVGSNVPFNFK	58.61	0.0042	67357.8	APIS MELLIFERA	alpha glucosidase 2
[12]		94158854	11	20.1	5.5	7.5e-10	1936.26	646.09	3	645.967	0.12	GTPQNNVPNWVMGNHDR	51.493	0.0084	67357.8	APIS MELLIFERA	alpha glucosidase 2
[12]		94158854	11	20.1	5.5	7.5e-10	1233.43	617.22	2	616.822	0.4	DLEDLTAEAKK	47.408	0.025	67357.8	APIS MELLIFERA	alpha glucosidase 2
[13]		66545506	11	25.8	4.89	2.1e-08	1962.57	981.79	2	981.494	0.3	SGTIFDNVLITDDPEVAR	63.841	2.1e-08	47174.5	APIS MELLIFERA	PREDICTED: similar to Calreticulin CG9429-PA isoform 1
[13]		66545506	11	25.8	4.89	2.1e-08	2668.32	890.11	3	889.434	0.68	GPWIHPEIDNPEYTPDPELYKR	58.16	1.4e-07	47174.5	APIS MELLIFERA	PREDICTED: similar to Calreticulin CG9429-PA isoform 1
[13]		66545506	11	25.8	4.89	2.1e-08	1217.09	609.05	2	608.791	0.26	NWVYSEHPGK	43.48	4e-06	47174.5	APIS MELLIFERA	PREDICTED: similar to Calreticulin CG9429-PA isoform 1
[13]		66545506	11	25.8	4.89	2.1e-08	1649.17	825.09	2	824.914	0.18	FGEEVWKPTLEGEK	54.293	9.3e-06	47174.5	APIS MELLIFERA	PREDICTED: similar to Calreticulin CG9429-PA isoform 1
[13]		66545506	11	25.8	4.89	2.1e-08	1292.29	646.65	2	646.366	0.28	TLIVKPDNTYK	44.755	2.1e-05	47174.5	APIS MELLIFERA	PREDICTED: similar to Calreticulin CG9429-PA isoform 1
[13]		66545506	11	25.8	4.89	2.1e-08	2511.45	837.82	3	837.401	0.42	GPWIHPEIDNPEYTPDPELYK	59.898	5.8e-05	47174.5	APIS MELLIFERA	PREDICTED: similar to Calreticulin CG9429-PA isoform 1
[13]		66545506	11	25.8	4.89	2.1e-08	1121.23	561.12	2	560.829	0.29	KVHVIFSYK	46.265	0.0002	47174.5	APIS MELLIFERA	PREDICTED: similar to Calreticulin CG9429-PA isoform 1
[13]		66545506	11	25.8	4.89	2.1e-08	2122.2	708.07	3	707.659	0.41	FWNDPENDKGIQTSQDAR	48.08	0.00022	47174.5	APIS MELLIFERA	PREDICTED: similar to Calreticulin CG9429-PA isoform 1
[13]		66545506	11	25.8	4.89	2.1e-08	1905.78	635.93	3	635.675	0.25	KFGEEVWKPTLEGEKK	50.028	0.0073	47174.5	APIS MELLIFERA	PREDICTED: similar to Calreticulin CG9429-PA isoform 1
[13]		66545506	11	25.8	4.89	2.1e-08	1778.19	593.4	3	592.977	0.42	KFGEEVWKPTLEGEK	52.108	0.01	47174.5	APIS MELLIFERA	PREDICTED: similar to Calreticulin CG9429-PA isoform 1
[13]		66545506	11	25.8	4.89	2.1e-08	1165.39	583.2	2	582.751	0.45	FWNDPENDK	44.997	0.035	47174.5	APIS MELLIFERA	PREDICTED: similar to Calreticulin CG9429-PA isoform 1
[14]		66513092	8	34	6.22	1.3e-10	1825.31	913.16	2	913.034	0.13	VAILGASGGIGQPLSLLMK	70.736	1.3e-10	35801.9	APIS MELLIFERA	PREDICTED: similar to mitochondrial malate dehydrogenase precursor isoform 1
[14]		66513092	8	34	6.22	1.3e-10	1308.21	654.61	2	653.896	0.71	GTQVVIIPAGVPR	54.843	1.6e-07	35801.9	APIS MELLIFERA	PREDICTED: similar to mitochondrial malate dehydrogenase precursor isoform 1
[14]		66513092	8	34	6.22	1.3e-10	1305.41	653.21	2	653.343	-0.13	NLGIGNLNAYEK	53.592	1.4e-06	35801.9	APIS MELLIFERA	PREDICTED: similar to mitochondrial malate dehydrogenase precursor isoform 1
[14]		66513092	8	34	6.22	1.3e-10	1435.41	718.21	2	717.877	0.33	AYTGPEELKDALK	51.564	1.5e-06	35801.9	APIS MELLIFERA	PREDICTED: similar to mitochondrial malate dehydrogenase precursor isoform 1
[14]		66513092	8	34	6.22	1.3e-10	1244.29	622.65	2	622.33	0.32	DLTQAIAEASPK	53.348	1.9e-06	35801.9	APIS MELLIFERA	PREDICTED: similar to mitochondrial malate dehydrogenase precursor isoform 1
[14]		66513092	8	34	6.22	1.3e-10	1338.09	669.55	2	669.338	0.21	DDLFSTNASIVR	55.077	3.5e-06	35801.9	APIS MELLIFERA	PREDICTED: similar to mitochondrial malate dehydrogenase precursor isoform 1
[14]		66513092	8	34	6.22	1.3e-10	1219.55	610.28	2	610.356	-0.076	VFGVTTLDIVR	60.943	1.7e-05	35801.9	APIS MELLIFERA	PREDICTED: similar to mitochondrial malate dehydrogenase precursor isoform 1
[14]		66513092	8	34	6.22	1.3e-10	2412.81	804.94	3	804.468	0.47	AFIAIISNPVNSTVPIASEVLKK	68.799	0.021	35801.9	APIS MELLIFERA	PREDICTED: similar to mitochondrial malate dehydrogenase precursor isoform 1
[15]		110762902	9	21.7	5.25	3.5e-09	1440.19	720.6	2	720.398	0.2	VALTGLTVAEYFR	65.309	3.5e-09	55130.7	APIS MELLIFERA	PREDICTED: similar to ATP synthase- CG11154-PA, isoform A
[15]		110762902	9	21.7	5.25	3.5e-09	1292.17	646.59	2	646.336	0.25	GQSVLDSGYPIR	50.88	2e-08	55130.7	APIS MELLIFERA	PREDICTED: similar to ATP synthase- CG11154-PA, isoform A
[15]		110762902	9	21.7	5.25	3.5e-09	1436.33	718.67	2	718.381	0.29	FTQAGSEVSALLGR	58.012	2.6e-08	55130.7	APIS MELLIFERA	PREDICTED: similar to ATP synthase- CG11154-PA, isoform A
[15]		110762902	9	21.7	5.25	3.5e-09	1368.09	684.55	2	684.38	0.17	IINVIGEPIDER	54.592	1.7e-07	55130.7	APIS MELLIFERA	PREDICTED: similar to ATP synthase- CG11154-PA, isoform A
[15]		110762902	9	21.7	5.25	3.5e-09	1457.55	729.28	2	729.423	-0.14	TVLIMELINNVAK	73.64	8.6e-07	55130.7	APIS MELLIFERA	PREDICTED: similar to ATP synthase- CG11154-PA, isoform A
[15]		110762902	9	21.7	5.25	3.5e-09	1814.43	605.48	3	604.974	0.51	IMDPNIIGAEHYNVAR	53.903	0.00024	55130.7	APIS MELLIFERA	PREDICTED: similar to ATP synthase- CG11154-PA, isoform A
[15]		110762902	9	21.7	5.25	3.5e-09	1141.75	571.38	2	571.296	0.084	NVIGEPIDER	46.188	0.0022	55130.7	APIS MELLIFERA	PREDICTED: similar to ATP synthase- CG11154-PA, isoform A
[15]		110762902	9	21.7	5.25	3.5e-09	1172.27	586.64	2	586.323	0.32	MVGPIEEVVAK	52.649	0.0036	55130.7	APIS MELLIFERA	PREDICTED: similar to ATP synthase- CG11154-PA, isoform A
[15]		110762902	9	21.7	5.25	3.5e-09	1975.26	659.09	3	658.723	0.37	LLAPYAKGGKIGLFGGAGVGK	54.576	0.048	55130.7	APIS MELLIFERA	PREDICTED: similar to ATP synthase- CG11154-PA, isoform A
[16]		110766073	8	10.7	6.45	6.7e-11	1783.63	892.32	2	891.996	0.32	LIPVLGDISNEDLGLSK	66.378	6.7e-11	126930	APIS MELLIFERA	PREDICTED: similar to CG5065-PA
[16]		110766073	8	10.7	6.45	6.7e-11	1280.37	640.69	2	640.33	0.36	IAEQVINDYSK	47.038	3.7e-07	126930	APIS MELLIFERA	PREDICTED: similar to CG5065-PA
[16]		110766073	8	10.7	6.45	6.7e-11	1106.17	553.59	2	553.302	0.29	MLELPLFDK	65.18	2.1e-05	126930	APIS MELLIFERA	PREDICTED: similar to CG5065-PA
[16]		110766073	8	10.7	6.45	6.7e-11	1189.39	595.2	2	594.788	0.41	NFNINEYFK	59.113	0.0025	126930	APIS MELLIFERA	PREDICTED: similar to CG5065-PA
[16]		110766073	8	10.7	6.45	6.7e-11	1368.07	684.54	2	684.912	-0.37	MIPALIIDEILK	30.875	0.013	126930	APIS MELLIFERA	PREDICTED: similar to CG5065-PA
[16]		110766073	8	10.7	6.45	6.7e-11	1783.47	595.16	3	594.661	0.5	GDFYKEVLNELLTLK	43.1	0.018	126930	APIS MELLIFERA	PREDICTED: similar to CG5065-PA
[16]		110766073	8	10.7	6.45	6.7e-11	2594.58	649.4	4	649.302	0.099	NGAFQEGQHVTESSVHMHSPKWT	34.562	0.04	126930	APIS MELLIFERA	PREDICTED: similar to CG5065-PA
[16]		110766073	8	10.7	6.45	6.7e-11	2625.42	657.11	4	656.38	0.73	LIEKLLRSCPEIGHIFILM(Oxidation)RPK	49.494	0.047	126930	APIS MELLIFERA	PREDICTED: similar to CG5065-PA
[17]		229892248	6	9.4	6.55	3.8e-11	1349.65	675.33	2	675.371	-0.041	TLTILDSGIGMTK	58.87	3.8e-11	83384.3	APIS MELLIFERA	heat shock protein 90
[17]		229892248	6	9.4	6.55	3.8e-11	1371.29	686.15	2	685.802	0.35	EDQTEYLEESK	43.572	1.8e-06	83384.3	APIS MELLIFERA	heat shock protein 90
[17]		229892248	6	9.4	6.55	3.8e-11	1229.33	615.17	2	614.848	0.32	ADLVNNLGTIAK	53.332	3.2e-06	83384.3	APIS MELLIFERA	heat shock protein 90
[17]		229892248	6	9.4	6.55	3.8e-11	1266.15	633.58	2	633.31	0.27	EQVANSSFVER	44.083	5.3e-06	83384.3	APIS MELLIFERA	heat shock protein 90
[17]		229892248	6	9.4	6.55	3.8e-11	1276.57	638.79	2	638.325	0.47	ELISNASDALDK	49.26	8.4e-06	83384.3	APIS MELLIFERA	heat shock protein 90
[17]		229892248	6	9.4	6.55	3.8e-11	1141.15	571.08	2	570.756	0.32	YTEDEELNK	28.14	3.4e-05	83384.3	APIS MELLIFERA	heat shock protein 90
[18]		110763974	7	14.5	4.78	8.5e-09	1493.23	747.12	2	746.891	0.23	ANNTNYGLAAGVVTK	49.087	8.5e-09	49162.4	APIS MELLIFERA	PREDICTED: similar to CG31075-PA isoform 1
[18]		110763974	7	14.5	4.78	8.5e-09	1518.29	759.65	2	759.855	-0.21	SGQEEGAVLETGGER	43.946	2.2e-06	49162.4	APIS MELLIFERA	PREDICTED: similar to CG31075-PA isoform 1
[18]		110763974	7	14.5	4.78	8.5e-09	1268.63	634.82	2	634.795	0.025	FETMDEVIER	52.502	4.5e-06	49162.4	APIS MELLIFERA	PREDICTED: similar to CG31075-PA isoform 1
[18]		110763974	7	14.5	4.78	8.5e-09	1359.89	680.45	2	680.38	0.07	EEIFGPVQSILK	64.222	4.9e-06	49162.4	APIS MELLIFERA	PREDICTED: similar to CG31075-PA isoform 1
[18]		110763974	7	14.5	4.78	8.5e-09	1235.27	618.14	2	617.814	0.33	IYDQFVNHAK	44.879	8.4e-06	49162.4	APIS MELLIFERA	PREDICTED: similar to CG31075-PA isoform 1
[18]		110763974	7	14.5	4.78	8.5e-09	1672.11	836.56	2	836.488	0.072	IAKEEIFGPVQSILK	62.499	3.2e-05	49162.4	APIS MELLIFERA	PREDICTED: similar to CG31075-PA isoform 1
[18]		110763974	7	14.5	4.78	8.5e-09	1118.13	559.57	2	559.278	0.29	EGAVLETGGER	30.348	0.041	49162.4	APIS MELLIFERA	PREDICTED: similar to CG31075-PA isoform 1
[19]		110764717	6	15.9	5.45	1.2e-09	1727.99	864.5	2	864.453	0.047	IQVGPVVDVLGDEMTR	64.019	1.2e-09	46646.7	APIS MELLIFERA	PREDICTED: similar to Isocitrate dehydrogenase CG7176-PC, isoform C isoform 2
[19]		110764717	6	15.9	5.45	1.2e-09	1446.25	723.63	2	723.367	0.26	LEITWIGDNEQK	57.034	1.5e-07	46646.7	APIS MELLIFERA	PREDICTED: similar to Isocitrate dehydrogenase CG7176-PC, isoform C isoform 2
[19]		110764717	6	15.9	5.45	1.2e-09	1342.39	671.7	2	671.341	0.36	TVEAEAAHGTVTR	35.866	3.8e-06	46646.7	APIS MELLIFERA	PREDICTED: similar to Isocitrate dehydrogenase CG7176-PC, isoform C isoform 2
[19]		110764717	6	15.9	5.45	1.2e-09	1136.13	568.57	2	568.322	0.25	IQHIVHNFK	35.934	7.8e-05	46646.7	APIS MELLIFERA	PREDICTED: similar to Isocitrate dehydrogenase CG7176-PC, isoform C isoform 2
[19]		110764717	6	15.9	5.45	1.2e-09	1694.21	847.61	2	847.431	0.18	ETSTNPIASIFAWTR	71.969	0.00081	46646.7	APIS MELLIFERA	PREDICTED: similar to Isocitrate dehydrogenase CG7176-PC, isoform C isoform 2
[19]		110764717	6	15.9	5.45	1.2e-09	1185.97	593.49	2	593.291	0.2	TVEAEAAHGTVT	40.401	0.047	46646.7	APIS MELLIFERA	PREDICTED: similar to Isocitrate dehydrogenase CG7176-PC, isoform C isoform 2
[20]		11935049	8	15.5	3.81	5.4e-07	1476.37	738.69	2	738.396	0.29	FLEQQNQVLQTK	48.587	5.4e-07	66067.2	HOMO SAPIENS	keratin 1
[20]		11935049	8	15.5	3.81	5.4e-07	1384.27	692.64	2	692.349	0.29	SLNNQFASFIDK	58.692	9.5e-07	66067.2	HOMO SAPIENS	keratin 1
[20]		11935049	8	15.5	3.81	5.4e-07	1125.55	563.28	2	563.275	0.0052	AEAESLYQSK	39.273	7.7e-06	66067.2	HOMO SAPIENS	keratin 1
[20]		11935049	8	15.5	3.81	5.4e-07	1302.01	651.51	2	651.861	-0.35	SLDLDSIIAEVK	67.351	9.1e-05	66067.2	HOMO SAPIENS	keratin 1
[20]		11935049	8	15.5	3.81	5.4e-07	1718.13	859.57	2	858.929	0.64	QISNLQQSISDAEQR	51.865	0.00093	66067.2	HOMO SAPIENS	keratin 1
[20]		11935049	8	15.5	3.81	5.4e-07	2456.26	614.82	4	614.781	0.039	GYRGGSGGGGGGSSGGRGSGGGSSGGSIGGR	61.182	0.0023	66067.2	HOMO SAPIENS	keratin 1
[20]		11935049	8	15.5	3.81	5.4e-07	2479.83	827.28	3	827.719	-0.44	GGGGGSSGGRGSGGGSSGGSIGGRGSSSGGVK	59.052	0.023	66067.2	HOMO SAPIENS	keratin 1
[20]		11935049	8	15.5	3.81	5.4e-07	2511.39	837.8	3	838.03	-0.23	GGSGGGGGGSSGGRGSGGGSSGGSIGGRGSSSGG	81.698	0.03	66067.2	HOMO SAPIENS	keratin 1
[21]		58585076	6	15	4.77	1.4e-08	1807.49	904.25	2	903.941	0.31	FYYNPFTPFGPVTEK	66.095	1.4e-08	63898.6	APIS MELLIFERA	juvenile hormone esterase
[21]		58585076	6	15	4.77	1.4e-08	1293.29	647.15	2	646.859	0.29	SLHYLHIAGPGK	47.305	2.2e-07	63898.6	APIS MELLIFERA	juvenile hormone esterase
[21]		58585076	6	15	4.77	1.4e-08	1656.89	828.95	2	828.868	0.082	EDFWNSINFNENK	61.655	7.8e-07	63898.6	APIS MELLIFERA	juvenile hormone esterase
[21]		58585076	6	15	4.77	1.4e-08	1256.11	628.56	2	628.29	0.27	IQMDSSTNFGR	46.592	9.5e-07	63898.6	APIS MELLIFERA	juvenile hormone esterase
[21]		58585076	6	15	4.77	1.4e-08	1165.23	583.12	2	582.809	0.31	LASTTTTNDIK	33.117	0.0025	63898.6	APIS MELLIFERA	juvenile hormone esterase
[21]		58585076	6	15	4.77	1.4e-08	2449.83	817.28	3	817.757	-0.48	ISGNGKQYEAYEGIPYALPPVGK	69.191	0.044	63898.6	APIS MELLIFERA	juvenile hormone esterase
[22]		48094441	5	18.6	5.65	9.3e-10	1377.23	689.12	2	688.818	0.3	LAEASQAADESER	36.568	9.3e-10	32900	APIS MELLIFERA	PREDICTED: similar to Tropomyosin 1 CG4898-PD, isoform D isoform 1
[22]		48094441	5	18.6	5.65	9.3e-10	1486.25	743.63	2	743.386	0.24	ALQNAESEVAALNR	51.461	7.7e-08	32900	APIS MELLIFERA	PREDICTED: similar to Tropomyosin 1 CG4898-PD, isoform D isoform 1
[22]		48094441	5	18.6	5.65	9.3e-10	1258.27	629.64	2	629.338	0.3	IQLLEEDLER	55.373	2.5e-05	32900	APIS MELLIFERA	PREDICTED: similar to Tropomyosin 1 CG4898-PD, isoform D isoform 1
[22]		48094441	5	18.6	5.65	9.3e-10	1147.41	574.21	2	573.795	0.42	LAMVEADLER	51.132	0.00037	32900	APIS MELLIFERA	PREDICTED: similar to Tropomyosin 1 CG4898-PD, isoform D isoform 1
[22]		48094441	5	18.6	5.65	9.3e-10	2228.88	743.63	3	743.389	0.24	LEEKDKALQNAESEVAALNR	51.461	0.0074	32900	APIS MELLIFERA	PREDICTED: similar to Tropomyosin 1 CG4898-PD, isoform D isoform 1
[23]		66534655	5	24.2	4.76	9.3e-09	1254.61	627.81	2	627.856	-0.046	GQVPVLDVDGKK	46.874	9.3e-09	17700.3	APIS MELLIFERA	PREDICTED: similar to Glutathione S transferase S1 CG8938-PA, isoform A, partial
[23]		66534655	5	24.2	4.76	9.3e-09	1593.21	797.11	2	796.883	0.23	LAAFHYEENEEIK	49.561	3.4e-07	17700.3	APIS MELLIFERA	PREDICTED: similar to Glutathione S transferase S1 CG8938-PA, isoform A, partial
[23]		66534655	5	24.2	4.76	9.3e-09	1467.17	734.09	2	733.88	0.21	IADEVVPYYLER	56.508	3.7e-07	17700.3	APIS MELLIFERA	PREDICTED: similar to Glutathione S transferase S1 CG8938-PA, isoform A, partial
[23]		66534655	5	24.2	4.76	9.3e-09	1595.41	798.21	2	797.927	0.28	KIADEVVPYYLER	55.039	1.9e-06	17700.3	APIS MELLIFERA	PREDICTED: similar to Glutathione S transferase S1 CG8938-PA, isoform A, partial
[23]		66534655	5	24.2	4.76	9.3e-09	1338.09	669.55	2	669.304	0.25	FHYEENEEIK	44.104	0.00039	17700.3	APIS MELLIFERA	PREDICTED: similar to Glutathione S transferase S1 CG8938-PA, isoform A, partial
[24]		5627	6	18.5	4.34	4.7e-08	1388.69	694.85	2	694.838	0.012	NSADTISSYFVGK	55.358	4.7e-08	18487.1	APIS MELLIFERA	phospholipase A-2
[24]		5627	6	18.5	4.34	4.7e-08	1144.71	572.86	2	572.789	0.071	MYFNLIDTK	59.149	3.6e-05	18487.1	APIS MELLIFERA	phospholipase A-2
[24]		5627	6	18.5	4.34	4.7e-08	1159.17	580.09	2	579.783	0.31	VYQW(Dioxidation)FDLR	57.119	0.00011	18487.1	APIS MELLIFERA	phospholipase A-2
[24]		5627	6	18.5	4.34	4.7e-08	1161.13	581.07	2	580.787	0.28	M(Oxidation)YFNLIDTK	55.054	0.00013	18487.1	APIS MELLIFERA	phospholipase A-2
[24]		5627	6	18.5	4.34	4.7e-08	1127.11	564.06	2	563.788	0.27	VYQWFDLR	60.532	0.00023	18487.1	APIS MELLIFERA	phospholipase A-2
[24]		5627	6	18.5	4.34	4.7e-08	1143.97	572.49	2	571.785	0.7	VYQW(Oxidation)FDLR	58.334	0.037	18487.1	APIS MELLIFERA	phospholipase A-2
[25]		297591983	4	35.1	5.15	1e-08	1767.45	884.23	2	883.941	0.29	AANVDVESYWPGLFAK	66.476	1e-08	11623.2	APIS MELLIFERA	60S acidic ribosomal protein P1
[25]		297591983	4	35.1	5.15	1e-08	1148.13	574.57	2	574.278	0.29	VDDDVAVTGEK	40.229	2.9e-08	11623.2	APIS MELLIFERA	60S acidic ribosomal protein P1
[25]		297591983	4	35.1	5.15	1e-08	1187.63	594.32	2	594.335	-0.015	ELITNIGSGVGK	50.511	2.7e-07	11623.2	APIS MELLIFERA	60S acidic ribosomal protein P1
[25]		297591983	4	35.1	5.15	1e-08	1625.15	813.08	2	812.904	0.18	NVDVESYWPGLFAK	66.768	1.6e-05	11623.2	APIS MELLIFERA	60S acidic ribosomal protein P1
[26]		110766532	6	18.9	4.26	1.3e-07	1678.59	839.8	2	839.468	0.33	AILALMTPLPEFYAK	70.46	1.3e-07	36004.8	APIS MELLIFERA	PREDICTED: similar to Annexin IX CG5730-PC, isoform C isoform 1
[26]		110766532	6	18.9	4.26	1.3e-07	1660.89	830.95	2	830.894	0.056	SADPFDPEQDASLLR	60.69	4.6e-06	36004.8	APIS MELLIFERA	PREDICTED: similar to Annexin IX CG5730-PC, isoform C isoform 1
[26]		110766532	6	18.9	4.26	1.3e-07	1148.03	574.52	2	574.301	0.22	GLGTDDSTLIR	48.192	8.5e-05	36004.8	APIS MELLIFERA	PREDICTED: similar to Annexin IX CG5730-PC, isoform C isoform 1
[26]		110766532	6	18.9	4.26	1.3e-07	1154.23	577.62	2	577.314	0.31	LAGHSLEDAIK	46.459	0.00025	36004.8	APIS MELLIFERA	PREDICTED: similar to Annexin IX CG5730-PC, isoform C isoform 1
[26]		110766532	6	18.9	4.26	1.3e-07	1503.47	752.24	2	751.86	0.38	DPFDPEQDASLLR	62.203	0.028	36004.8	APIS MELLIFERA	PREDICTED: similar to Annexin IX CG5730-PC, isoform C isoform 1
[26]		110766532	6	18.9	4.26	1.3e-07	1166.91	583.96	2	584.246	-0.29	NDCNAEW(Dioxidation)KR	60.887	0.048	36004.8	APIS MELLIFERA	PREDICTED: similar to Annexin IX CG5730-PC, isoform C isoform 1
[27]		48142692	4	18.3	5.16	5.5e-10	1534.33	767.67	2	767.441	0.23	VPVHNVSVVDLTVR	52.923	5.5e-10	35883.5	APIS MELLIFERA	PREDICTED: similar to Glyceraldehyde-3-phosphate dehydrogenase 2 (Glyceraldehyde-3-phosphate dehydrogenase II) (GAPDH II) isoform 1
[27]		48142692	4	18.3	5.16	5.5e-10	1343.29	672.15	2	671.852	0.3	IENDQLVVNGNK	43.846	5.4e-08	35883.5	APIS MELLIFERA	PREDICTED: similar to Glyceraldehyde-3-phosphate dehydrogenase 2 (Glyceraldehyde-3-phosphate dehydrogenase II) (GAPDH II) isoform 1
[27]		48142692	4	18.3	5.16	5.5e-10	2653.98	885.33	3	885.127	0.2	VIHDNFEIVEGLMTTVHAVTATQK	75.109	2.5e-06	35883.5	APIS MELLIFERA	PREDICTED: similar to Glyceraldehyde-3-phosphate dehydrogenase 2 (Glyceraldehyde-3-phosphate dehydrogenase II) (GAPDH II) isoform 1
[27]		48142692	4	18.3	5.16	5.5e-10	1160.43	580.72	2	580.825	-0.1	AGIALNNNFVK	51.836	5.4e-06	35883.5	APIS MELLIFERA	PREDICTED: similar to Glyceraldehyde-3-phosphate dehydrogenase 2 (Glyceraldehyde-3-phosphate dehydrogenase II) (GAPDH II) isoform 1
[28]		110755553	4	14.7	5.44	1.8e-09	1605.31	803.16	2	802.89	0.27	NVEYVAEAMHNVTK	53.277	1.8e-09	48049.5	APIS MELLIFERA	PREDICTED: similar to aspartate aminotransferase 2 precursor isoform 1
[28]		110755553	4	14.7	5.44	1.8e-09	1417.23	709.12	2	708.372	0.75	IVNEILEDSDLR	55.577	3.5e-06	48049.5	APIS MELLIFERA	PREDICTED: similar to aspartate aminotransferase 2 precursor isoform 1
[28]		110755553	4	14.7	5.44	1.8e-09	1131.15	566.08	2	565.806	0.27	LALGDNSDVVK	47.291	3.1e-05	48049.5	APIS MELLIFERA	PREDICTED: similar to aspartate aminotransferase 2 precursor isoform 1
[28]		110755553	4	14.7	5.44	1.8e-09	2999.54	750.64	4	749.884	0.76	WSHITNQIGMFCFTGLKSSEAEKLIR	45.868	0.047	48049.5	APIS MELLIFERA	PREDICTED: similar to aspartate aminotransferase 2 precursor isoform 1
[29]		283436154	5	16.8	4.62	5.8e-08	1410.05	705.53	2	705.357	0.17	YIWIDGTGESLR	57.152	5.8e-08	41263.9	APIS MELLIFERA	glutamine synthetase
[29]		283436154	5	16.8	4.62	5.8e-08	1217.37	609.19	2	608.814	0.38	YLDLPQPENK	50.339	0.00025	41263.9	APIS MELLIFERA	glutamine synthetase
[29]		283436154	5	16.8	4.62	5.8e-08	1288.49	644.75	2	644.328	0.42	DFDGRPLGWPK	52.555	0.0023	41263.9	APIS MELLIFERA	glutamine synthetase
[29]		283436154	5	16.8	4.62	5.8e-08	1660.09	830.55	2	830.386	0.16	HPSDLPIWTFDGSST	61.724	0.012	41263.9	APIS MELLIFERA	glutamine synthetase
[29]		283436154	5	16.8	4.62	5.8e-08	1489.97	745.49	2	744.901	0.59	VAEEFGVVVSLDPK	61.742	0.012	41263.9	APIS MELLIFERA	glutamine synthetase
[30]		94158626	5	9.5	4.21	1.9e-08	1526.33	763.67	2	763.842	-0.17	DHNAFEYAMAVMK	61.533	1.9e-08	62250.9	APIS MELLIFERA	cytochrome P450 4G11
[30]		94158626	5	9.5	4.21	1.9e-08	1137.09	569.05	2	568.856	0.19	LLEIIHGLTK	55.834	4.3e-07	62250.9	APIS MELLIFERA	cytochrome P450 4G11
[30]		94158626	5	9.5	4.21	1.9e-08	1268.39	634.7	2	634.325	0.37	SFIDLFNANAR	62.984	9.5e-07	62250.9	APIS MELLIFERA	cytochrome P450 4G11
[30]		94158626	5	9.5	4.21	1.9e-08	1849.55	925.28	2	924.497	0.78	TNNIVVEGVSFGQSVGLK	63.242	0.0016	62250.9	APIS MELLIFERA	cytochrome P450 4G11
[30]		94158626	5	9.5	4.21	1.9e-08	1209.09	605.05	2	604.319	0.73	EGVSFGQSVGLK	59.318	0.033	62250.9	APIS MELLIFERA	cytochrome P450 4G11
[31]		66530423	4	9.6	3.77	2.1e-07	1402.35	701.68	2	700.893	0.79	EEIFGPVQQILK	64.244	2.1e-07	55686	APIS MELLIFERA	PREDICTED: similar to Aldehyde dehydrogenase CG3752-PA isoform 1
[31]		66530423	4	9.6	3.77	2.1e-07	1309.29	655.15	2	654.867	0.28	TGAALVAHNLVDK	47.337	3e-07	55686	APIS MELLIFERA	PREDICTED: similar to Aldehyde dehydrogenase CG3752-PA isoform 1
[31]		66530423	4	9.6	3.77	2.1e-07	1430.21	715.61	2	715.395	0.21	GVLLNNLASLMER	68.821	1.1e-06	55686	APIS MELLIFERA	PREDICTED: similar to Aldehyde dehydrogenase CG3752-PA isoform 1
[31]		66530423	4	9.6	3.77	2.1e-07	1178.29	589.65	2	589.32	0.33	NHGQVIPIDGK	42.243	1.5e-06	55686	APIS MELLIFERA	PREDICTED: similar to Aldehyde dehydrogenase CG3752-PA isoform 1
[32]		66531434	6	11.7	3.26	4.4e-07	1434.15	717.58	2	717.393	0.19	IPTNILAEFYPR	66.636	4.4e-07	55144.5	APIS MELLIFERA	PREDICTED: similar to Vacuolar H+-ATPase 55kD B subunit CG17369-PB, isoform B
[32]		66531434	6	11.7	3.26	4.4e-07	1950.43	975.72	2	974.995	0.72	EMIQTGISAIDVMNSIAR	68.057	5.1e-07	55144.5	APIS MELLIFERA	PREDICTED: similar to Vacuolar H+-ATPase 55kD B subunit CG17369-PB, isoform B
[32]		66531434	6	11.7	3.26	4.4e-07	1105.29	553.15	2	552.771	0.38	TPVSEDMLGR	46.93	5.6e-06	55144.5	APIS MELLIFERA	PREDICTED: similar to Vacuolar H+-ATPase 55kD B subunit CG17369-PB, isoform B
[32]		66531434	6	11.7	3.26	4.4e-07	1163.19	582.1	2	581.317	0.78	VFNGSGKPIDK	37.213	0.0056	55144.5	APIS MELLIFERA	PREDICTED: similar to Vacuolar H+-ATPase 55kD B subunit CG17369-PB, isoform B
[32]		66531434	6	11.7	3.26	4.4e-07	1636.27	818.64	2	817.938	0.7	M(Oxidation)LGRVFNGSGKPIDK	47.705	0.024	55144.5	APIS MELLIFERA	PREDICTED: similar to Vacuolar H+-ATPase 55kD B subunit CG17369-PB, isoform B
[32]		66531434	6	11.7	3.26	4.4e-07	2925.15	975.72	3	976.497	-0.78	W(Dioxidation)SRIYPKEM(Oxidation)IQTGISAIDVMNSIAR	68.057	0.046	55144.5	APIS MELLIFERA	PREDICTED: similar to Vacuolar H+-ATPase 55kD B subunit CG17369-PB, isoform B
[33]		66521459	3	14.1	5.25	2e-09	1656.37	828.69	2	828.379	0.31	SGVEFSSGGVSNQDTGK	45.088	2e-09	30482.3	APIS MELLIFERA	PREDICTED: similar to porin CG6647-PA, isoform A
[33]		66521459	3	14.1	5.25	2e-09	1484.21	742.61	2	742.383	0.23	DLFSSGYHFGLIK	63.413	9.1e-08	30482.3	APIS MELLIFERA	PREDICTED: similar to porin CG6647-PA, isoform A
[33]		66521459	3	14.1	5.25	2e-09	1180.69	590.85	2	590.783	0.067	YNLDNDASIR	46.299	1.1e-05	30482.3	APIS MELLIFERA	PREDICTED: similar to porin CG6647-PA, isoform A
[34]		149939403	5	7.6	3.04	5.6e-06	1179.31	590.16	2	589.824	0.34	ILGYNLEAASK	52.168	5.6e-06	81487.7	APIS MELLIFERA	hexamerin
[34]		149939403	5	7.6	3.04	5.6e-06	1598.95	799.98	2	799.933	0.048	GELFSLYYPQLLR	69.381	1e-05	81487.7	APIS MELLIFERA	hexamerin
[34]		149939403	5	7.6	3.04	5.6e-06	1126.11	563.56	2	563.264	0.3	GEEYLYSHK	31.746	5.1e-05	81487.7	APIS MELLIFERA	hexamerin
[34]		149939403	5	7.6	3.04	5.6e-06	1202.19	601.6	2	601.298	0.3	IIDYYHSYK	45.519	5.5e-05	81487.7	APIS MELLIFERA	hexamerin
[34]		149939403	5	7.6	3.04	5.6e-06	1221.17	611.09	2	610.827	0.26	QAFPFWLPSK	64.376	0.00071	81487.7	APIS MELLIFERA	hexamerin
[35]		110776421	5	17.8	3.43	4.5e-07	1742.25	871.63	2	871.418	0.21	IINNDFNFNDVNFR	61.143	4.5e-07	39670.1	APIS MELLIFERA	PREDICTED: similar to yellow-e2 CG17044-PA
[35]		110776421	5	17.8	3.43	4.5e-07	1836.57	918.79	2	918.433	0.36	INDPEGNEYMLALSNR	56.082	6.3e-06	39670.1	APIS MELLIFERA	PREDICTED: similar to yellow-e2 CG17044-PA
[35]		110776421	5	17.8	3.43	4.5e-07	1217.53	609.27	2	608.821	0.45	ILGANVDDLMR	56.89	2.3e-05	39670.1	APIS MELLIFERA	PREDICTED: similar to yellow-e2 CG17044-PA
[35]		110776421	5	17.8	3.43	4.5e-07	1328.33	664.67	2	664.809	-0.14	LTSNTFDYDPR	48.464	8e-05	39670.1	APIS MELLIFERA	PREDICTED: similar to yellow-e2 CG17044-PA
[35]		110776421	5	17.8	3.43	4.5e-07	1144.33	572.67	2	572.793	-0.12	IMENLPQSGR	44.646	0.032	39670.1	APIS MELLIFERA	PREDICTED: similar to yellow-e2 CG17044-PA
[36]		94158718	3	30.4	5.57	9.2e-10	1816.37	908.69	2	908.418	0.27	FNAYDDGGNFNEVVVR	54.911	9.2e-10	15203.8	APIS MELLIFERA	odorant binding protein 21
[36]		94158718	3	30.4	5.57	9.2e-10	1678.61	839.81	2	839.912	-0.1	EIAEIYLDENEVNK	54.314	2.3e-05	15203.8	APIS MELLIFERA	odorant binding protein 21
[36]		94158718	3	30.4	5.57	9.2e-10	1286.27	643.64	2	642.88	0.76	LTLEELQIGLR	62.795	3.9e-05	15203.8	APIS MELLIFERA	odorant binding protein 21
[37]		156544544	4	17.1	4.11	9e-08	1258.21	629.61	2	629.362	0.25	AINQGGLTSVAVK	47.824	9e-08	27317.5	NASONIA VITRIPENNIS	PREDICTED: similar to proteasome subunit alpha type
[37]		156544544	4	17.1	4.11	9e-08	1156.83	578.92	2	578.809	0.11	HITIFSPEGR	48.176	7.8e-07	27317.5	NASONIA VITRIPENNIS	PREDICTED: similar to proteasome subunit alpha type
[37]		156544544	4	17.1	4.11	9e-08	1161.19	581.1	2	580.803	0.3	LYQVEYAFK	53.429	6.7e-05	27317.5	NASONIA VITRIPENNIS	PREDICTED: similar to proteasome subunit alpha type
[37]		156544544	4	17.1	4.11	9e-08	1183.19	592.1	2	591.785	0.31	QTEANSYLEK	40.445	0.0031	27317.5	NASONIA VITRIPENNIS	PREDICTED: similar to proteasome subunit alpha type
[38]		229892214	4	7.4	4.14	4.6e-08	1491.29	746.15	2	745.9	0.25	VFAPEEISAMVLGK	67.906	4.6e-08	72866.4	APIS MELLIFERA	heat shock protein cognate 3
[38]		229892214	4	7.4	4.14	4.6e-08	1317.17	659.09	2	658.822	0.27	NELESYAYSLK	54.576	6.4e-06	72866.4	APIS MELLIFERA	heat shock protein cognate 3
[38]		229892214	4	7.4	4.14	4.6e-08	1340.47	670.74	2	670.395	0.34	ELTDIVQPIIAK	58.221	0.0026	72866.4	APIS MELLIFERA	heat shock protein cognate 3
[38]		229892214	4	7.4	4.14	4.6e-08	1223.03	612.02	2	611.346	0.67	TAAAIAYGLDKK	48.041	0.008	72866.4	APIS MELLIFERA	heat shock protein cognate 3
[39]		66531851	4	17.5	4.4	1.5e-08	1257.35	629.18	2	628.793	0.39	VFNEYGVEDGK	45.811	1.5e-08	30048.7	APIS MELLIFERA	PREDICTED: similar to Protein disulfide-isomerase precursor (PDI), partial
[39]		66531851	4	17.5	4.4	1.5e-08	1703.53	852.27	2	851.954	0.32	SLPLVVDFNQDTVQK	60.654	6.1e-05	30048.7	APIS MELLIFERA	PREDICTED: similar to Protein disulfide-isomerase precursor (PDI), partial
[39]		66531851	4	17.5	4.4	1.5e-08	1284.39	642.7	2	642.335	0.36	Q(Gln->pyro-Glu)ADDIVNWVIK	67.67	0.0068	30048.7	APIS MELLIFERA	PREDICTED: similar to Protein disulfide-isomerase precursor (PDI), partial
[39]		66531851	4	17.5	4.4	1.5e-08	1103.33	552.17	2	551.816	0.35	KLQDGGFPIK	46.963	0.011	30048.7	APIS MELLIFERA	PREDICTED: similar to Protein disulfide-isomerase precursor (PDI), partial
[40]		66521433	5	8	3.36	2e-07	1474.05	737.53	2	737.432	0.098	FSIPVVLLDETLK	72.186	2e-07	112168	APIS MELLIFERA	PREDICTED: similar to Calcium-transporting ATPase sarcoplasmic/endoplasmic reticulum type (Calcium pump) isoform 1
[40]		66521433	5	8	3.36	2e-07	1588.61	794.81	2	794.943	-0.13	IDQSILTGESVSVIK	57.516	1.7e-06	112168	APIS MELLIFERA	PREDICTED: similar to Calcium-transporting ATPase sarcoplasmic/endoplasmic reticulum type (Calcium pump) isoform 1
[40]		66521433	5	8	3.36	2e-07	1292.23	646.62	2	646.354	0.27	NILFSGTNVAAGK	52.397	0.00011	112168	APIS MELLIFERA	PREDICTED: similar to Calcium-transporting ATPase sarcoplasmic/endoplasmic reticulum type (Calcium pump) isoform 1
[40]		66521433	5	8	3.36	2e-07	1300.31	650.66	2	650.385	0.27	GVVIGTGLNTAIGK	53.521	0.0023	112168	APIS MELLIFERA	PREDICTED: similar to Calcium-transporting ATPase sarcoplasmic/endoplasmic reticulum type (Calcium pump) isoform 1
[40]		66521433	5	8	3.36	2e-07	2538.62	635.41	4	636.089	-0.68	GDGVNDAPALKKAEIGIAMGSGTAVAK	90.088	0.046	112168	APIS MELLIFERA	PREDICTED: similar to Calcium-transporting ATPase sarcoplasmic/endoplasmic reticulum type (Calcium pump) isoform 1
[41]		66536233	4	9.4	3.43	2.9e-07	1595.33	798.17	2	797.887	0.28	EASPLEFVMEVTDK	70.834	2.9e-07	58254.4	APIS MELLIFERA	PREDICTED: similar to UGP CG4347-PA, isoform A isoform 1
[41]		66536233	4	9.4	3.43	2.9e-07	1280.33	640.67	2	640.36	0.31	GTVIIIANHGER	44.978	2.5e-05	58254.4	APIS MELLIFERA	PREDICTED: similar to UGP CG4347-PA, isoform A isoform 1
[41]		66536233	4	9.4	3.43	2.9e-07	1300.33	650.67	2	650.361	0.31	IDLPSGTILENK	55.91	5.2e-05	58254.4	APIS MELLIFERA	PREDICTED: similar to UGP CG4347-PA, isoform A isoform 1
[41]		66536233	4	9.4	3.43	2.9e-07	1297.25	649.13	2	648.84	0.29	FFNTNNLWIK	61.257	0.00014	58254.4	APIS MELLIFERA	PREDICTED: similar to UGP CG4347-PA, isoform A isoform 1
[42]		62198227	4	11.7	3.27	2.3e-06	1499.87	750.44	2	750.425	0.015	ILIGGVSDLLENTR	63.634	2.3e-06	50541.4	APIS MELLIFERA	major royal jelly protein 7
[42]		62198227	4	11.7	3.27	2.3e-06	1490.45	745.73	2	745.435	0.3	LLVFDLNSSQLIK	66.79	6.5e-06	50541.4	APIS MELLIFERA	major royal jelly protein 7
[42]		62198227	4	11.7	3.27	2.3e-06	1533.59	767.3	2	767.39	-0.09	LLQPYPDWSWTK	61.599	1.3e-05	50541.4	APIS MELLIFERA	major royal jelly protein 7
[42]		62198227	4	11.7	3.27	2.3e-06	1379.39	690.2	2	690.338	-0.14	YDGVPSSLNVISE	92.132	0.033	50541.4	APIS MELLIFERA	major royal jelly protein 7
[43]		48097086	3	14.2	4.72	4.4e-08	1534.19	767.6	2	767.373	0.23	AVTETGVELSNEER	45.981	4.4e-08	28076.7	APIS MELLIFERA	PREDICTED: similar to 14-3-3-like protein (Leonardo protein) (14-3-3 zeta) isoform 1
[43]		48097086	3	14.2	4.72	4.4e-08	1245.35	623.18	2	622.828	0.35	M(Met-loss+Acetyl)SVDKEELVQR	44.943	0.00011	28076.7	APIS MELLIFERA	PREDICTED: similar to 14-3-3-like protein (Leonardo protein) (14-3-3 zeta) isoform 1
[43]		48097086	3	14.2	4.72	4.4e-08	1190.31	595.66	2	595.334	0.33	DSTLIMQLLR	67.142	0.0053	28076.7	APIS MELLIFERA	PREDICTED: similar to 14-3-3-like protein (Leonardo protein) (14-3-3 zeta) isoform 1
[44]		110765226	3	33.3	3.95	2.3e-08	1338.25	669.63	2	669.395	0.23	YVAAYLLAVLGGK	71.838	2.3e-08	11999.7	APIS MELLIFERA	PREDICTED: similar to 60S acidic ribosomal protein P2 (Acidic ribosomal protein RPA1)
[44]		110765226	3	33.3	3.95	2.3e-08	1364.27	682.64	2	682.342	0.3	SIEELISQGMEK	58.949	6.1e-07	11999.7	APIS MELLIFERA	PREDICTED: similar to 60S acidic ribosomal protein P2 (Acidic ribosomal protein RPA1)
[44]		110765226	3	33.3	3.95	2.3e-08	1348.15	674.58	2	674.354	0.23	ILSSVGIETDGEK	48.146	6.6e-07	11999.7	APIS MELLIFERA	PREDICTED: similar to 60S acidic ribosomal protein P2 (Acidic ribosomal protein RPA1)
[45]		66499419	3	3.9	4.17	1.2e-07	1373.45	687.23	2	686.823	0.41	FTTENFVTEER	50.486	1.2e-07	98561.1	APIS MELLIFERA	PREDICTED: similar to Puromycin sensitive aminopeptidase CG1009-PC, isoform C isoform 1
[45]		66499419	3	3.9	4.17	1.2e-07	1343.61	672.31	2	671.901	0.41	ALGAIKDETLLAK	51.163	4.1e-06	98561.1	APIS MELLIFERA	PREDICTED: similar to Puromycin sensitive aminopeptidase CG1009-PC, isoform C isoform 1
[45]		66499419	3	3.9	4.17	1.2e-07	1138.35	569.68	2	569.306	0.37	INPGTIGFYR	52.368	0.016	98561.1	APIS MELLIFERA	PREDICTED: similar to Puromycin sensitive aminopeptidase CG1009-PC, isoform C isoform 1
[46]		66515350	3	2	4.77	2.8e-08	1430.29	715.65	2	715.408	0.24	VSVVEAVANIMGIK	76.044	2.8e-08	261462	APIS MELLIFERA	PREDICTED: similar to CG3523-PA
[46]		66515350	3	2	4.77	2.8e-08	1616.51	808.76	2	807.976	0.78	THQLNKHLVANVLK	101.284	0.014	261462	APIS MELLIFERA	PREDICTED: similar to CG3523-PA
[46]		66515350	3	2	4.77	2.8e-08	2382.9	794.97	3	795.399	-0.43	DLQNEESLQVEHANINVLYR	107.641	0.032	261462	APIS MELLIFERA	PREDICTED: similar to CG3523-PA
[47]		110769113	2	5.8	5.16	3.2e-08	1532.69	766.85	2	766.849	0.0012	YAADDAEFQDFLK	60.034	3.2e-08	48252.3	APIS MELLIFERA	PREDICTED: similar to CG4409-PA, partial
[47]		110769113	2	5.8	5.16	3.2e-08	1254.19	627.6	2	627.313	0.29	FLENSGLNMTK	50.299	1.7e-06	48252.3	APIS MELLIFERA	PREDICTED: similar to CG4409-PA, partial
[48]		66525576	4	13.5	3.1	5.1e-06	1374.35	687.68	2	687.832	-0.15	IAENYEVFDFK	58.434	5.1e-06	36082.5	APIS MELLIFERA	PREDICTED: similar to CG6084-PA, isoform A isoform 1
[48]		66525576	4	13.5	3.1	5.1e-06	1842.47	921.74	2	921.465	0.28	FYNGNEIPVFGLGTWK	68.724	0.00027	36082.5	APIS MELLIFERA	PREDICTED: similar to CG6084-PA, isoform A isoform 1
[48]		66525576	4	13.5	3.1	5.1e-06	2763.21	921.74	3	922.481	-0.74	M(Met-loss+Acetyl)VANSAPTLKFYNGNEIPVFGLGTWK	68.724	0.0071	36082.5	APIS MELLIFERA	PREDICTED: similar to CG6084-PA, isoform A isoform 1
[48]		66525576	4	13.5	3.1	5.1e-06	2061.03	687.68	3	687.685	-0.0048	SVTRSRIAENYEVFDFK	58.434	0.017	36082.5	APIS MELLIFERA	PREDICTED: similar to CG6084-PA, isoform A isoform 1
[49]		48097100	3	11.3	3.33	1.6e-06	1461.27	731.14	2	730.903	0.24	FNEEIAPVTITVK	56.445	1.6e-06	42504.3	APIS MELLIFERA	PREDICTED: similar to yippee interacting protein 2 CG4600-PA
[49]		48097100	3	11.3	3.33	1.6e-06	2331	777.67	3	777.409	0.26	VDNVIFGHVLPISSSDGGFLTR	68.004	4.1e-06	42504.3	APIS MELLIFERA	PREDICTED: similar to yippee interacting protein 2 CG4600-PA
[49]		48097100	3	11.3	3.33	1.6e-06	1263.35	632.18	2	631.828	0.35	RQEVDEFALR	47.509	8e-05	42504.3	APIS MELLIFERA	PREDICTED: similar to yippee interacting protein 2 CG4600-PA
[50]		110765081	4	12.4	3.47	6.9e-07	1468.43	734.72	2	734.424	0.3	ILNANLITPEEIK	57.654	6.9e-07	44573.9	APIS MELLIFERA	PREDICTED: similar to lethal (1) G0334 CG7010-PC, isoform C isoform 1
[50]		110765081	4	12.4	3.47	6.9e-07	1314.19	657.6	2	656.83	0.77	TEASFETKPFR	46.397	0.0045	44573.9	APIS MELLIFERA	PREDICTED: similar to lethal (1) G0334 CG7010-PC, isoform C isoform 1
[50]		110765081	4	12.4	3.47	6.9e-07	1242.11	621.56	2	621.34	0.22	NANLITPEEIK	50.542	0.012	44573.9	APIS MELLIFERA	PREDICTED: similar to lethal (1) G0334 CG7010-PC, isoform C isoform 1
[50]		110765081	4	12.4	3.47	6.9e-07	2922.03	974.68	3	974.472	0.21	ASTDYYTRGDYIPGIWVDGM(Oxidation)DVLAVK	102.053	0.029	44573.9	APIS MELLIFERA	PREDICTED: similar to lethal (1) G0334 CG7010-PC, isoform C isoform 1
[51]		3063347	3	6.4	3.05	1.7e-06	1405.23	703.12	2	702.867	0.25	YYVTIIDAPGHR	51.404	1.7e-06	41409	LAETMONICE SP.	elongation factor-1alpha
[51]		3063347	3	6.4	3.05	1.7e-06	1282.11	641.56	2	641.283	0.28	DSTEPPYSETR	38.269	8.8e-06	41409	LAETMONICE SP.	elongation factor-1alpha
[51]		3063347	3	6.4	3.05	1.7e-06	1412.99	707	2	706.804	0.2	MDSTEPPYSETR	42.828	1.6e-05	41409	LAETMONICE SP.	elongation factor-1alpha
[52]		48102814	3	9.5	3.91	6.7e-09	1598.47	799.74	2	799.427	0.31	VPIEWESVDVTPVK	58.964	6.7e-09	39135.6	APIS MELLIFERA	PREDICTED: similar to lethal (1) G0156 CG12233-PA, isoform A
[52]		48102814	3	9.5	3.91	6.7e-09	2053.35	685.12	3	684.693	0.43	VPIEWESVDVTPVKGPDGK	57.227	0.00015	39135.6	APIS MELLIFERA	PREDICTED: similar to lethal (1) G0156 CG12233-PA, isoform A
[52]		48102814	3	9.5	3.91	6.7e-09	1589.19	795.1	2	794.944	0.16	ANPTALLLSAVM(Oxidation)MLK	78.022	0.0012	39135.6	APIS MELLIFERA	PREDICTED: similar to lethal (1) G0156 CG12233-PA, isoform A
[53]		48096769	3	12.2	3.47	5.1e-07	1164.15	582.58	2	581.827	0.75	GKDGIVFAVEK	48.002	5.1e-07	27956	APIS MELLIFERA	PREDICTED: similar to Proteasome subunit alpha type 3 (Proteasome component C8) (Macropain subunit C8) (Multicatalytic endopeptidase complex subunit C8)
[53]		48096769	3	12.2	3.47	5.1e-07	1112.21	556.61	2	556.293	0.32	VFQVEYAQK	46.683	1.4e-05	27956	APIS MELLIFERA	PREDICTED: similar to Proteasome subunit alpha type 3 (Proteasome component C8) (Macropain subunit C8) (Multicatalytic endopeptidase complex subunit C8)
[53]		48096769	3	12.2	3.47	5.1e-07	1384.41	692.71	2	693.324	-0.61	QFELEM(Oxidation)SW(Oxidation)VGK	91.85	0.035	27956	APIS MELLIFERA	PREDICTED: similar to Proteasome subunit alpha type 3 (Proteasome component C8) (Macropain subunit C8) (Multicatalytic endopeptidase complex subunit C8)
[54]		66559310	2	7.9	4.32	2e-08	1523.69	762.35	2	762.425	-0.075	SVIIPAQNTGLGPEK	50.659	2e-08	34415.1	APIS MELLIFERA	PREDICTED: similar to 60S acidic ribosomal protein P0 (DNA-(apurinic or apyrimidinic site) lyase) (Apurinic-apyrimidinic endonuclease) isoform 1
[54]		66559310	2	7.9	4.32	2e-08	1204.21	602.61	2	602.335	0.28	LVQLLDDYPK	55.47	1.4e-06	34415.1	APIS MELLIFERA	PREDICTED: similar to 60S acidic ribosomal protein P0 (DNA-(apurinic or apyrimidinic site) lyase) (Apurinic-apyrimidinic endonuclease) isoform 1
[55]		66565929	2	16.1	4.34	3.7e-08	1369.41	685.21	2	684.896	0.31	LVAIVDIIDQNR	62.873	3.7e-08	17505.7	APIS MELLIFERA	PREDICTED: similar to Ribosomal protein L14 CG6253-PA
[55]		66565929	2	16.1	4.34	3.7e-08	1240.29	620.65	2	620.338	0.31	VLVDGPSSNVPR	45.839	8.9e-06	17505.7	APIS MELLIFERA	PREDICTED: similar to Ribosomal protein L14 CG6253-PA
[56]		66523390	3	6.1	3.37	8.9e-08	1536.57	768.79	2	768.362	0.43	DIVHSGLDYTMER	53.317	8.9e-08	61643.3	APIS MELLIFERA	PREDICTED: similar to Glutamate dehydrogenase CG5320-PF, isoform F isoform 1
[56]		66523390	3	6.1	3.37	8.9e-08	1315.39	658.2	2	657.805	0.39	EMSWIADTYAK	54.942	2.9e-05	61643.3	APIS MELLIFERA	PREDICTED: similar to Glutamate dehydrogenase CG5320-PF, isoform F isoform 1
[56]		66523390	3	6.1	3.37	8.9e-08	1174.07	587.54	2	587.304	0.24	ADHQIPDHLK	34.878	0.00045	61643.3	APIS MELLIFERA	PREDICTED: similar to Glutamate dehydrogenase CG5320-PF, isoform F isoform 1
[57]		109115260	3	5.7	2.95	1.2e-06	1382.31	691.66	2	691.328	0.33	ALEESNYELEGK	46.495	1.2e-06	62101.3	MACACA MULATTA	PREDICTED: keratin, type I cytoskeletal 10-like isoform 2
[57]		109115260	3	5.7	2.95	1.2e-06	1109.93	555.47	2	555.249	0.22	DAEAWFNEK	51.06	0.00011	62101.3	MACACA MULATTA	PREDICTED: keratin, type I cytoskeletal 10-like isoform 2
[57]		109115260	3	5.7	2.95	1.2e-06	1262.43	631.72	2	631.802	-0.082	SLLEGEGSSGGGGR	40.012	0.0002	62101.3	MACACA MULATTA	PREDICTED: keratin, type I cytoskeletal 10-like isoform 2
[58]		110750766	3	11.2	3.27	1.5e-06	1413.39	707.2	2	706.909	0.29	NITIEQTGKPALK	46.476	1.5e-06	23002.2	APIS MELLIFERA	PREDICTED: similar to Protein lethal(2)essential for life (Protein Efl21)
[58]		110750766	3	11.2	3.27	1.5e-06	1128.07	564.54	2	564.265	0.27	QDEHGWISR	39.464	0.0019	23002.2	APIS MELLIFERA	PREDICTED: similar to Protein lethal(2)essential for life (Protein Efl21)
[58]		110750766	3	11.2	3.27	1.5e-06	1172.03	586.52	2	586.319	0.2	NITIEQTGKPA	43.961	0.012	23002.2	APIS MELLIFERA	PREDICTED: similar to Protein lethal(2)essential for life (Protein Efl21)
[59]		66537377	2	9.3	4.12	3.2e-08	1468.19	734.6	2	734.333	0.27	TLEEDDDEAFKR	44.338	3.2e-08	27105.1	APIS MELLIFERA	PREDICTED: similar to CG17489-PA.3, partial
[59]		66537377	2	9.3	4.12	3.2e-08	1186.17	593.59	2	593.28	0.31	RFPGYDSESK	38.509	3.6e-05	27105.1	APIS MELLIFERA	PREDICTED: similar to CG17489-PA.3, partial
[60]		222839154	2	6.8	4.24	2.7e-07	1312.47	656.74	2	656.868	-0.13	LIAPIAMEEGLR	58.593	2.7e-07	43095.6	POPULUS TRICHOCARPA	predicted protein
[60]		222839154	2	6.8	4.24	2.7e-07	1722.99	575	3	574.302	0.7	LAKYDFPGDDTPIIR	42.639	0.037	43095.6	POPULUS TRICHOCARPA	predicted protein
[61]		169160859	2	9.9	4.26	3.8e-08	1412.55	706.78	2	706.381	0.4	LPDGQVITIGNER	51.55	3.8e-08	17136.1	HOMO SAPIENS	PREDICTED: similar to actin, gamma 1
[61]		169160859	2	9.9	4.26	3.8e-08	1704.21	852.61	2	851.96	0.65	YKLPDGQVITIGNER	59.242	0.017	17136.1	HOMO SAPIENS	PREDICTED: similar to actin, gamma 1
[62]		110762641	2	13.7	3.38	5.5e-07	1264.13	632.57	2	631.788	0.78	FFFESATEER	53.232	5.5e-07	17353.4	APIS MELLIFERA	PREDICTED: similar to Ferritin 1 heavy chain homologue CG2216-PE, isoform E
[62]		110762641	2	13.7	3.38	5.5e-07	1245.97	623.49	2	623.338	0.15	SLESQVNVEIK	51.077	0.00022	17353.4	APIS MELLIFERA	PREDICTED: similar to Ferritin 1 heavy chain homologue CG2216-PE, isoform E
[63]		110768336	1	7	5.61	3e-09	1574.41	787.71	2	787.433	0.28	VLEQLTGQQPVFSK	54.077	3e-09	22844.7	APIS MELLIFERA	PREDICTED: similar to Ribosomal protein L11 CG7726-PA
[64]		66506623	2	5.9	2.84	1.8e-06	1447.11	724.06	2	723.885	0.17	YYEVILVDPAHK	53.364	1.8e-06	23885	APIS MELLIFERA	PREDICTED: similar to 60S ribosomal protein L15
[64]		66506623	2	5.9	2.84	1.8e-06	1284.25	642.63	2	642.353	0.28	YEVILVDPAHK	50.751	5.1e-05	23885	APIS MELLIFERA	PREDICTED: similar to 60S ribosomal protein L15
[65]		71906104	2	10.6	3.09	3e-07	1337.05	669.03	2	668.812	0.22	DGYWTPAAAAADK	49.881	3e-07	22712.5	DECHLOROMONAS AROMATICA RCB	OmpA/MotB
[65]		71906104	2	10.6	3.09	3e-07	1129.59	565.3	2	565.332	-0.032	RVDIEVIGTK	47.426	0.00038	22712.5	DECHLOROMONAS AROMATICA RCB	OmpA/MotB
[66]		66522386	2	8.5	3.06	2.8e-07	1458.37	729.69	2	729.881	-0.19	ALTNAESEVAALNR	51.88	2.8e-07	32157.3	APIS MELLIFERA	PREDICTED: similar to Tropomyosin 2 CG4843-PB, isoform B
[66]		66522386	2	8.5	3.06	2.8e-07	1244.35	622.68	2	622.33	0.35	VQLIEEDLER	52.082	0.0023	32157.3	APIS MELLIFERA	PREDICTED: similar to Tropomyosin 2 CG4843-PB, isoform B
[67]		66508940	1	4.5	4.37	3.5e-07	1259.51	630.26	2	630.327	-0.068	VSLDGADVNLEK	51.25	3.5e-07	29906.9	APIS MELLIFERA	PREDICTED: similar to CG6459-PA
[68]		295842193	1	11.1	4.27	4.3e-08	1322.15	661.58	2	661.354	0.23	ADLIAYIEQASK	64.706	4.3e-08	11909.8	APIS MELLIFERA	cytochrome c
[69]		66534286	1	2.1	4.2	5.9e-08	1828.57	914.79	2	913.999	0.79	NSPAIIFIDELDAIAPK	77.782	5.9e-08	88896.3	APIS MELLIFERA	PREDICTED: similar to TER94 CG2331-PA, isoform A isoform 1
[70]		74096071	1	2.2	4.1	2.1e-07	1198.15	599.58	2	599.327	0.25	VVDALGNPLDGK	49.055	2.1e-07	59956.3	CIONA INTESTINALIS	ATP synthase alpha-subunit
[71]		110759197	1	3	3.79	1.3e-07	1526.39	763.7	2	763.38	0.32	IENNLYDLEGFAK	59.529	1.3e-07	50103.2	APIS MELLIFERA	PREDICTED: similar to Cytochrome b5-related CG13279-PA
[72]		66549799	2	8.3	2.24	9.5e-06	1109.13	555.07	2	554.789	0.28	FPLTTEAAMK	50.213	9.5e-06	26606.6	APIS MELLIFERA	PREDICTED: similar to Ribosomal protein L23A CG7977-PA
[72]		66549799	2	8.3	2.24	9.5e-06	1112.25	556.63	2	556.825	-0.19	VNTLIRPDGK	41.498	0.0057	26606.6	APIS MELLIFERA	PREDICTED: similar to Ribosomal protein L23A CG7977-PA
[73]		110761561	1	1.9	2.84	1.4e-06	1239.09	620.05	2	619.861	0.19	YIYLIGLLDR	70.021	1.4e-06	59756.2	APIS MELLIFERA	PREDICTED: similar to Malic enzyme CG10120-PB, isoform B isoform 1, partial
[74]		110749015	1	6.3	2.72	1.6e-06	1658.45	829.73	2	829.467	0.26	NILDTNLLAPAIFSR	69.953	1.6e-06	26510.8	APIS MELLIFERA	PREDICTED: similar to CG10962-PB, isoform B
[75]		[-110761561]	1	5	0.7	0.0086	2775.82	694.71	4	695.328	-0.62	IGFSGDKGHNGALDGSSDKGHYGM(Oxidation)LNK	96.783	0.0086	59756.2	APIS MELLIFERA	PREDICTED: similar to Malic enzyme CG10120-PB, isoform B isoform 1, partial
Search Compare in ProteinProspector 5.7.1
© Copyright (2003-2011) The Regents of the University of California.

## Sheet: Table 5
Rank	Uniq Pep	Acc #	Num Unique	% Cov	Best Disc Score	Best Expect Val	Protein MW	Species	Protein Name
[1]		58585098	40	56	6.07	1.5e-10	48886.5	APIS MELLIFERA	major royal jelly protein 1
[2]		66513649	45	20.8	5.37	2.1e-09	278414	APIS MELLIFERA	PREDICTED: similar to Spectrin alpha chain
[3]		110758758	33	12.1	4.89	4.2e-09	374763	APIS MELLIFERA	PREDICTED: similar to Retinoid- and fatty-acid binding protein CG11064-PA isoform 1
[4]		66547450	21	29.6	6.5	4.4e-11	60413	APIS MELLIFERA	PREDICTED: similar to 60 kDa heat shock protein, mitochondrial precursor (Hsp60) (60 kDa chaperonin) (CPN60) (Heat shock protein 60) (HSP-60) (Mitochondrial matrix protein P1)
[5]		58585146	21	47.9	6.53	5.7e-11	40008.7	APIS MELLIFERA	arginine kinase
[6]		58585154	16	42.9	6.35	1.7e-10	7584.9	APIS MELLIFERA	melittin precursor
[7]		229892248	12	15.9	6.76	7.6e-12	83384.3	APIS MELLIFERA	heat shock protein 90
[8]		66521738	11	22.9	5.79	5.7e-09	51930.5	APIS MELLIFERA	PREDICTED: similar to lethal (1) G0030 CG3861-PA, isoform A
[9]		110762902	12	28.3	5.21	5e-09	55130.7	APIS MELLIFERA	PREDICTED: similar to ATP synthase- CG11154-PA, isoform A
[10]		11935049	13	23.3	4.7	1.7e-07	66067.2	HOMO SAPIENS	keratin 1
[11]		12585365	12	23.9	4.96	1.7e-08	50230.9	MANSE	RecName: Full=Tubulin beta-1 chain; AltName: Full=Beta-1-tubulin
[12]		66517710	10	8.6	6.53	1e-10	161988	APIS MELLIFERA	PREDICTED: similar to tripeptidyl peptidase II
[13]		66513092	9	35.8	6.72	1.1e-10	35801.9	APIS MELLIFERA	PREDICTED: similar to mitochondrial malate dehydrogenase precursor isoform 1
[14]		94158854	10	18.4	5.35	1e-08	67357.8	APIS MELLIFERA	alpha glucosidase 2
[15]		110764717	8	23.7	5.28	1.3e-09	46646.7	APIS MELLIFERA	PREDICTED: similar to Isocitrate dehydrogenase CG7176-PC, isoform C isoform 2
[16]		66545506	9	23.1	5.47	2.9e-09	47174.5	APIS MELLIFERA	PREDICTED: similar to Calreticulin CG9429-PA isoform 1
[17]		110758259	11	10.6	4.24	3.5e-08	105089	APIS MELLIFERA	PREDICTED: similar to CG14516-PA, isoform A, partial
[18]		48097086	7	30.4	5.49	3.1e-09	28076.7	APIS MELLIFERA	PREDICTED: similar to 14-3-3-like protein (Leonardo protein) (14-3-3 zeta) isoform 1
[19]		58585104	9	6.3	4.03	1.1e-07	201050	APIS MELLIFERA	vitellogenin
[20]		110757658	9	17.4	4.12	6.1e-07	64668.5	APIS MELLIFERA	PREDICTED: similar to Pyruvate dehydrogenase protein X component, mitochondrial precursor (Dihydrolipoamide dehydrogenase-binding protein of pyruvate dehydrogenase complex) (Lipoyl-containing pyruvate dehydrogenase complex component X) (E3-binding protein) (E...
[21]		58585254	5	37.3	6.73	3.7e-10	17171.3	APIS MELLIFERA	troponin C type IIIb
[22]		110765081	9	24.9	3.97	1.6e-07	44573.9	APIS MELLIFERA	PREDICTED: similar to lethal (1) G0334 CG7010-PC, isoform C isoform 1
[23]		66530423	8	20	4.17	7.3e-08	55686	APIS MELLIFERA	PREDICTED: similar to Aldehyde dehydrogenase CG3752-PA isoform 1
[24]		110749675	7	22.8	5.09	7.2e-09	32982.3	APIS MELLIFERA	PREDICTED: similar to Tropomyosin 1 CG4898-PD, isoform D
[25]		94158718	6	48.9	5.87	6.8e-10	15203.8	APIS MELLIFERA	odorant binding protein 21
[26]		167683072	7	24	4.05	6e-08	31131	ULOBORUS DIVERSUS	actin
[27]		66534286	5	7.5	5.38	1.1e-08	88896.3	APIS MELLIFERA	PREDICTED: similar to TER94 CG2331-PA, isoform A isoform 1
[28]		110750766	7	28.1	4.27	1.3e-07	23002.2	APIS MELLIFERA	PREDICTED: similar to Protein lethal(2)essential for life (Protein Efl21)
[29]		48142692	6	23.4	4.1	3.7e-08	35883.5	APIS MELLIFERA	PREDICTED: similar to Glyceraldehyde-3-phosphate dehydrogenase 2 (Glyceraldehyde-3-phosphate dehydrogenase II) (GAPDH II) isoform 1
[30]		58531215	5	14.7	4.21	7.1e-07	32986.7	APIS MELLIFERA	ADP/ATP translocase
[31]		229892214	6	9.6	4.2	1.4e-07	72866.4	APIS MELLIFERA	heat shock protein cognate 3
[32]		110768510	7	27.4	3.46	5.2e-07	24339.6	APIS MELLIFERA	PREDICTED: similar to Protein disulfide-isomerase precursor (PDI), partial
[33]		66548684	6	15.9	4.38	2.3e-08	55815.1	APIS MELLIFERA	PREDICTED: similar to Pyruvate kinase CG7070-PB, isoform B
[34]		110765226	4	33.3	4.7	2.4e-08	11999.7	APIS MELLIFERA	PREDICTED: similar to 60S acidic ribosomal protein P2 (Acidic ribosomal protein RPA1)
[35]		283436154	4	10.3	5.12	1.2e-09	41263.9	APIS MELLIFERA	glutamine synthetase
[36]		5627	5	18.5	4.51	3.9e-08	18487.1	APIS MELLIFERA	phospholipase A-2
[37]		66515272	5	9.7	4.3	1.6e-08	68373.5	APIS MELLIFERA	PREDICTED: similar to Vacuolar ATP synthase catalytic subunit A, osteoclast isoform (V-ATPase subunit A 2) (Vacuolar proton pump alpha subunit 2) (V-ATPase 69 kDa subunit 2) (Isoform HO68) isoform 1
[38]		66534655	5	24.8	4.07	2.5e-07	17700.3	APIS MELLIFERA	PREDICTED: similar to Glutathione S transferase S1 CG8938-PA, isoform A, partial
[39]		112983481	4	15.1	5.01	1.2e-08	49905.9	BOMBYX MORI	tubulin alpha chain
[40]		110766532	6	22.9	3.62	2.7e-07	36004.8	APIS MELLIFERA	PREDICTED: similar to Annexin IX CG5730-PC, isoform C isoform 1
[41]		66531851	4	18.3	3.65	3.5e-07	30048.7	APIS MELLIFERA	PREDICTED: similar to Protein disulfide-isomerase precursor (PDI), partial
[42]		110748949	4	17	4.1	6e-08	39600.6	APIS MELLIFERA	PREDICTED: similar to Aldolase CG6058-PF, isoform F
[43]		66521433	3	4.6	4.74	8.3e-08	112168	APIS MELLIFERA	PREDICTED: similar to Calcium-transporting ATPase sarcoplasmic/endoplasmic reticulum type (Calcium pump) isoform 1
[44]		110750756	4	23.2	3.91	7.3e-08	21282.4	APIS MELLIFERA	PREDICTED: similar to Protein lethal(2)essential for life (Protein Efl21) isoform 1
[45]		66512737	4	8.5	3.01	5.8e-06	60119.6	APIS MELLIFERA	PREDICTED: similar to Moesin CG10701-PD, isoform D
[46]		66537377	3	15.3	4	8.3e-08	27105.1	APIS MELLIFERA	PREDICTED: similar to CG17489-PA.3, partial
[47]		66565929	3	22.1	4.11	6.2e-08	17505.7	APIS MELLIFERA	PREDICTED: similar to Ribosomal protein L14 CG6253-PA
[48]		66512107	2	11	5.77	8.4e-09	26084.9	APIS MELLIFERA	PREDICTED: similar to Proteasome subunit beta type 1 (Proteasome 26 kDa subunit)
[49]		66500174	4	25.3	3.35	6e-06	19789.2	APIS MELLIFERA	PREDICTED: similar to Nucleoplasmin CG7917-PA isoform 1
[50]		297591983	3	45.9	3.52	2.4e-07	11623.2	APIS MELLIFERA	60S acidic ribosomal protein P1
[51]		48141571	4	12.1	3.41	1.9e-06	34139.5	APIS MELLIFERA	PREDICTED: similar to CG5567-PA
[52]		3063347	4	6.4	2.91	1.4e-06	41409	LAETMONICE SP.	elongation factor-1alpha
[53]		66508906	3	13.2	3.18	2.9e-06	27140.7	APIS MELLIFERA	PREDICTED: similar to CG10527-PA
[54]		7688	2	18.9	4.73	1.2e-08	16679.5	DROSOPHILA MELANOGASTER	unnamed protein product
[55]		94158711	2	21.5	4.74	3e-08	15031.6	APIS MELLIFERA	odorant binding protein 17
[56]		48100966	2	4.9	5.14	2.8e-09	59512.1	APIS MELLIFERA	PREDICTED: similar to bellwether CG3612-PA isoform 1
[57]		237681308	2	14.7	5.03	3e-09	23761.8	APIS MELLIFERA	glutathione S-transferase S1
[58]		66531434	3	8.1	3.29	2.2e-07	55144.5	APIS MELLIFERA	PREDICTED: similar to Vacuolar H+-ATPase 55kD B subunit CG17369-PB, isoform B
[59]		110767080	3	15.1	3.76	3.5e-07	28895.9	APIS MELLIFERA	PREDICTED: similar to 40S ribosomal protein S6
[60]		66521459	2	8.1	4.47	3.7e-08	30482.3	APIS MELLIFERA	PREDICTED: similar to porin CG6647-PA, isoform A
[61]		66515350	2	1	4.75	2.1e-08	261462	APIS MELLIFERA	PREDICTED: similar to CG3523-PA
[62]		110755784	2	21.5	3.76	2.1e-07	7385.7	APIS MELLIFERA	PREDICTED: similar to Ribosomal protein S28b CG2998-PA
[63]		295842193	2	21.3	3.6	1.9e-07	11909.8	APIS MELLIFERA	cytochrome c
[64]		48102814	3	12.8	2.63	1.6e-06	39135.6	APIS MELLIFERA	PREDICTED: similar to lethal (1) G0156 CG12233-PA, isoform A
[65]		110759540	2	14.6	4	9.3e-07	29666.9	APIS MELLIFERA	PREDICTED: similar to Probable elongation factor 1-delta (EF-1-delta)
[66]		110770725	2	36.2	3.28	9.1e-07	8808.2	APIS MELLIFERA	PREDICTED: similar to CG1516-PE, isoform E, partial
[67]		48094573	1	10.5	5.72	5.2e-09	19433.8	APIS MELLIFERA	PREDICTED: hypothetical protein
[68]		66518848	2	7	3.7	8.3e-07	52421.4	APIS MELLIFERA	PREDICTED: similar to Elongation factor Tu mitochondrial CG6050-PA isoform 2
[69]		66551115	2	5.7	3.47	4.9e-08	48156.4	APIS MELLIFERA	PREDICTED: similar to Eukaryotic initiation factor 4A (ATP-dependent RNA helicase eIF4A) (eIF-4A) isoform 2
[70]		156382661	1	4.4	5.06	2.8e-08	39352.8	NEMATOSTELLA VECTENSIS	predicted protein
[71]		66501020	1	3.6	4.94	1.9e-08	44487.7	APIS MELLIFERA	PREDICTED: similar to Rpt4 CG3455-PA
[72]		110769113	1	3.1	4.85	5.2e-08	48252.3	APIS MELLIFERA	PREDICTED: similar to CG4409-PA, partial
[73]		110749015	2	12.2	3.26	4.3e-07	26510.8	APIS MELLIFERA	PREDICTED: similar to CG10962-PB, isoform B
[74]		66513481	3	5.1	2.75	5.4e-07	117107	APIS MELLIFERA	PREDICTED: similar to Ubiquitin activating enzyme 1 CG1782-PA isoform 1
[75]		66517317	1	9.9	4.75	1.1e-08	17618.1	APIS MELLIFERA	PREDICTED: similar to lethal (1) G0230 CG2968-PA
[76]		66508940	1	4.5	4.67	1.9e-07	29906.9	APIS MELLIFERA	PREDICTED: similar to CG6459-PA
[77]		66559145	1	1.4	4.54	7.1e-08	112866	APIS MELLIFERA	PREDICTED: similar to CG8798-PA, isoform A
[78]		48098918	1	7.4	4.45	2.2e-06	21680	APIS MELLIFERA	PREDICTED: similar to Ribosomal protein L18 CG8615-PA
[79]		110756783	1	3.8	4.44	9.9e-09	49084.5	APIS MELLIFERA	PREDICTED: similar to CG5214-PA
[80]		66559310	2	9.5	3.04	1.6e-06	34415.1	APIS MELLIFERA	PREDICTED: similar to 60S acidic ribosomal protein P0 (DNA-(apurinic or apyrimidinic site) lyase) (Apurinic-apyrimidinic endonuclease) isoform 1
[81]		66500205	1	2.7	4.33	1.9e-07	53349.2	APIS MELLIFERA	PREDICTED: similar to CG3731-PB, isoform B
[82]		66550890	2	6.7	2.77	2.4e-06	35361.1	APIS MELLIFERA	PREDICTED: similar to Phosphoglyceromutase CG1721-PA, isoform A
[83]		110768336	1	7	4.17	8.8e-08	22844.7	APIS MELLIFERA	PREDICTED: similar to Ribosomal protein L11 CG7726-PA
[84]		48095625	1	11.4	4.01	3.1e-08	15343.3	APIS MELLIFERA	PREDICTED: similar to Ribosomal protein S24 CG3751-PA isoform 1
[85]		63334183	1	11.2	4.01	3.1e-08	15346.1	DERMACENTOR VARIABILIS	ribosomal protein S24
[86]		110748686	1	10.8	3.87	1e-07	15777.1	APIS MELLIFERA	PREDICTED: hypothetical protein
[87]		66530404	1	5.4	3.74	5.6e-08	30927.3	APIS MELLIFERA	PREDICTED: similar to Proteasome subunit alpha type 1 (Proteasome component C2) (Macropain subunit C2) (Multicatalytic endopeptidase complex subunit C2) (Proteasome nu chain)
[88]		110755553	3	11.7	2.19	2.7e-06	48049.5	APIS MELLIFERA	PREDICTED: similar to aspartate aminotransferase 2 precursor isoform 1
[89]		110769199	1	13.9	3.61	4.8e-07	11778.3	APIS MELLIFERA	PREDICTED: similar to 60S ribosomal protein L7a, partial
[90]		156554296	1	8.6	3.52	1.4e-07	16221.8	NASONIA VITRIPENNIS	PREDICTED: similar to S14e ribosomal protein
[91]		118596554	1	5.1	3.46	3.8e-08	32123.2	PAREPICHLOE CINEREA	acetaldehyde dehydrogenase
[92]		60115688	1	4.9	3.41	4.4e-07	24788.7	APIS MELLIFERA	venom protein 2 precursor
[93]		110758964	1	13.8	3.35	9.3e-08	10160.9	APIS MELLIFERA	PREDICTED: similar to Regucalcin (RC) (Senescence marker protein 30) (SMP-30)
[94]		66511547	1	2.2	3.23	4.2e-07	57952.8	APIS MELLIFERA	PREDICTED: similar to glucocerebrosidase precursor
[95]		58585114	1	7.5	3.17	6.5e-07	15938.9	APIS MELLIFERA	60S ribosomal protein L32
[96]		66517407	1	5	3.08	2.4e-07	29428.7	APIS MELLIFERA	PREDICTED: similar to Ribosomal protein S4 CG11276-PA, isoform A isoform 1
[97]		110756910	1	3.3	2.93	2.6e-06	45683.4	APIS MELLIFERA	PREDICTED: similar to CG32626-PC, isoform C
[98]		156547538	1	7.2	2.57	5.5e-06	35608	NASONIA VITRIPENNIS	PREDICTED: similar to glyceraldehyde-3-phosphate dehydrogenase
[99]		66511001	1	3.2	2.56	2.1e-06	42478	APIS MELLIFERA	PREDICTED: similar to CG2947-PA, isoform A isoform 1
[100]		48142173	1	4.4	2.35	5.7e-06	28120.5	APIS MELLIFERA	PREDICTED: similar to Proteasome subunit alpha type 7-1 (Proteasome 28 kDa subunit 1) (PROS-Dm28.1) isoform 1
[101]		[-58585104]	1	1.8	0.84	0.0098	201050	APIS MELLIFERA	vitellogenin
[102]		[-66513481]	2	3.9	0.53	0.0056	117107	APIS MELLIFERA	PREDICTED: similar to Ubiquitin activating enzyme 1 CG1782-PA isoform 1
[103]		[-110758758]	2	0.8	0.11	0.0064	374763	APIS MELLIFERA	PREDICTED: similar to Retinoid- and fatty-acid binding protein CG11064-PA isoform 1

## Sheet: Table 6
	Uniq Peptide	Acc #	Num Unique	% Cov	Best Disc Score	Best Expect Val	M+H	m/z	z	m/z Calc	Da	Peptide	RT	Expect	Protein MW	Species	Protein Name
[1]		58585098	40	56	6.07	1.5e-10	1769.67	885.34	2	884.926	0.41	TVAQSDETLQM(Oxidation)IASMK	56.914	1.5e-10	48886.5	APIS MELLIFERA	major royal jelly protein 1
[1]		58585098	40	56	6.07	1.5e-10	1753.27	877.14	2	876.929	0.21	TVAQSDETLQMIASMK	59.76	4.5e-10	48886.5	APIS MELLIFERA	major royal jelly protein 1
[1]		58585098	40	56	6.07	1.5e-10	1785.33	893.17	2	892.924	0.25	TVAQSDETLQM(Oxidation)IASM(Oxidation)K	51.553	1.1e-09	48886.5	APIS MELLIFERA	major royal jelly protein 1
[1]		58585098	40	56	6.07	1.5e-10	1763.27	882.14	2	881.878	0.26	M(Oxidation)VNNDFNFDDVNFR	59.198	1.2e-09	48886.5	APIS MELLIFERA	major royal jelly protein 1
[1]		58585098	40	56	6.07	1.5e-10	1399.11	700.06	2	699.286	0.77	FFDYDFGSDER	84.552	3.1e-09	48886.5	APIS MELLIFERA	major royal jelly protein 1
[1]		58585098	40	56	6.07	1.5e-10	1517.11	759.06	2	758.826	0.23	NNDFNFDDVNFR	58.446	5.7e-09	48886.5	APIS MELLIFERA	major royal jelly protein 1
[1]		58585098	40	56	6.07	1.5e-10	1748.29	874.65	2	873.881	0.77	MVNNDFNFDDVNFR	60.375	6.9e-09	48886.5	APIS MELLIFERA	major royal jelly protein 1
[1]		58585098	40	56	6.07	1.5e-10	1846.29	923.65	2	923.429	0.22	GEGLIVYHNSDDSFHR	48.196	6.9e-09	48886.5	APIS MELLIFERA	major royal jelly protein 1
[1]		58585098	40	56	6.07	1.5e-10	1948.51	974.76	2	973.986	0.77	VGDGGPLLQPYPDWSFAK	64.39	1.1e-08	48886.5	APIS MELLIFERA	major royal jelly protein 1
[1]		58585098	40	56	6.07	1.5e-10	1616.45	808.73	2	807.935	0.79	IMNANVNELILNTR	60.308	5.2e-08	48886.5	APIS MELLIFERA	major royal jelly protein 1
[1]		58585098	40	56	6.07	1.5e-10	1769.51	885.26	2	884.926	0.33	TVAQSDETLQMIASM(Oxidation)K	53.645	6.1e-08	48886.5	APIS MELLIFERA	major royal jelly protein 1
[1]		58585098	40	56	6.07	1.5e-10	1848.29	924.65	2	924.452	0.2	GDGGPLLQPYPDWSFAK	63.953	1.1e-07	48886.5	APIS MELLIFERA	major royal jelly protein 1
[1]		58585098	40	56	6.07	1.5e-10	1267.17	634.09	2	633.851	0.24	TFDLTTSQLLK	58.668	1.1e-07	48886.5	APIS MELLIFERA	major royal jelly protein 1
[1]		58585098	40	56	6.07	1.5e-10	2075.67	1038.34	2	1038.03	0.31	KVGDGGPLLQPYPDWSFAK	62.274	1.6e-07	48886.5	APIS MELLIFERA	major royal jelly protein 1
[1]		58585098	40	56	6.07	1.5e-10	1493.29	747.15	2	746.935	0.22	LLTFDLTTSQLLK	81.875	1.9e-07	48886.5	APIS MELLIFERA	major royal jelly protein 1
[1]		58585098	40	56	6.07	1.5e-10	1630.89	815.95	2	815.933	0.017	IM(Oxidation)NANVNELILNTR	55.45	2.7e-07	48886.5	APIS MELLIFERA	major royal jelly protein 1
[1]		58585098	40	56	6.07	1.5e-10	1402.29	701.65	2	701.33	0.32	QDAILSGEYDYK	50.038	4.9e-07	48886.5	APIS MELLIFERA	major royal jelly protein 1
[1]		58585098	40	56	6.07	1.5e-10	1632.43	816.72	2	816.358	0.36	NNYPSDIDQWHDK	47.552	8.8e-07	48886.5	APIS MELLIFERA	major royal jelly protein 1
[1]		58585098	40	56	6.07	1.5e-10	1558.33	779.67	2	779.381	0.29	RQDAILSGEYDYK	50.352	1.3e-06	48886.5	APIS MELLIFERA	major royal jelly protein 1
[1]		58585098	40	56	6.07	1.5e-10	1301.13	651.07	2	650.806	0.26	LTSNTFDYDPK	47.967	2.3e-06	48886.5	APIS MELLIFERA	major royal jelly protein 1
[1]		58585098	40	56	6.07	1.5e-10	2854.5	952.17	3	952.109	0.061	TSDYQQNDIHYEGVQNILDTQSSAK	55.928	4.8e-06	48886.5	APIS MELLIFERA	major royal jelly protein 1
[1]		58585098	40	56	6.07	1.5e-10	1187.73	594.37	2	594.264	0.11	TSNTFDYDPK	44.168	5.2e-06	48886.5	APIS MELLIFERA	major royal jelly protein 1
[1]		58585098	40	56	6.07	1.5e-10	1123.15	562.08	2	561.819	0.26	SLPILHEWK	53.96	7.1e-06	48886.5	APIS MELLIFERA	major royal jelly protein 1
[1]		58585098	40	56	6.07	1.5e-10	1535.11	768.06	2	767.941	0.12	IKEALPHVPIFDR	56.214	7.2e-06	48886.5	APIS MELLIFERA	major royal jelly protein 1
[1]		58585098	40	56	6.07	1.5e-10	1104.05	552.53	2	552.217	0.31	DYDFGSDER	43.233	2e-05	48886.5	APIS MELLIFERA	major royal jelly protein 1
[1]		58585098	40	56	6.07	1.5e-10	1377.45	689.23	2	689.372	-0.14	YNGVPSSLNVISK	52.609	2.8e-05	48886.5	APIS MELLIFERA	major royal jelly protein 1
[1]		58585098	40	56	6.07	1.5e-10	1961.75	981.38	2	981.484	-0.1	SPVASTSLYYVNTEQFR	57.322	3.4e-05	48886.5	APIS MELLIFERA	major royal jelly protein 1
[1]		58585098	40	56	6.07	1.5e-10	1185.41	593.21	2	593.333	-0.12	NVNELILNTR	51.351	4e-05	48886.5	APIS MELLIFERA	major royal jelly protein 1
[1]		58585098	40	56	6.07	1.5e-10	1380.19	690.6	2	690.393	0.21	LTFDLTTSQLLK	63.64	4.6e-05	48886.5	APIS MELLIFERA	major royal jelly protein 1
[1]		58585098	40	56	6.07	1.5e-10	1402.51	701.76	2	701.805	-0.045	NDFNFDDVNFR	58.594	8.3e-05	48886.5	APIS MELLIFERA	major royal jelly protein 1
[1]		58585098	40	56	6.07	1.5e-10	1554.21	777.61	2	777.336	0.27	FFDYDFGSDERR	53.403	8.7e-05	48886.5	APIS MELLIFERA	major royal jelly protein 1
[1]		58585098	40	56	6.07	1.5e-10	1156.01	578.51	2	577.814	0.7	SLPILHEW(Dioxidation)K	52.76	9e-05	48886.5	APIS MELLIFERA	major royal jelly protein 1
[1]		58585098	40	56	6.07	1.5e-10	1903.33	952.17	2	951.981	0.19	IHYEGVQNILDTQSSAK	55.928	0.0002	48886.5	APIS MELLIFERA	major royal jelly protein 1
[1]		58585098	40	56	6.07	1.5e-10	1220.35	610.68	2	610.291	0.39	YYVNTEQFR	48.908	0.00036	48886.5	APIS MELLIFERA	major royal jelly protein 1
[1]		58585098	40	56	6.07	1.5e-10	1294.21	647.61	2	647.351	0.26	EALPHVPIFDR	57.308	0.00046	48886.5	APIS MELLIFERA	major royal jelly protein 1
[1]		58585098	40	56	6.07	1.5e-10	1216.19	608.6	2	607.841	0.76	NGVPSSLNVISK	52.211	0.0034	48886.5	APIS MELLIFERA	major royal jelly protein 1
[1]		58585098	40	56	6.07	1.5e-10	1244.19	622.6	2	622.777	-0.18	YDDCSGIVSASK	41.554	0.0098	48886.5	APIS MELLIFERA	major royal jelly protein 1
[1]		58585098	40	56	6.07	1.5e-10	2156.03	1078.52	2	1078.6	-0.077	IFDRYINREYILVLSNK	52.954	0.015	48886.5	APIS MELLIFERA	major royal jelly protein 1
[1]		58585098	40	56	6.07	1.5e-10	1865.79	622.6	3	621.958	0.64	WSFAKYDDCSGIVSASK	41.554	0.034	48886.5	APIS MELLIFERA	major royal jelly protein 1
[1]		58585098	40	56	6.07	1.5e-10	3229.98	808.25	4	807.644	0.61	VNNDFNFDDVNFRIM(Oxidation)NANVNELILNTR	61.09	0.039	48886.5	APIS MELLIFERA	major royal jelly protein 1
[2]		66513649	45	20.8	5.37	2.1e-09	1709.51	855.26	2	854.467	0.79	IATLQTLADQLIAAEH	71.933	2.1e-09	278414	APIS MELLIFERA	PREDICTED: similar to Spectrin alpha chain
[2]		66513649	45	20.8	5.37	2.1e-09	1460.09	730.55	2	730.417	0.13	LLDSLQVQQLFR	65.489	6e-09	278414	APIS MELLIFERA	PREDICTED: similar to Spectrin alpha chain
[2]		66513649	45	20.8	5.37	2.1e-09	1563.15	782.08	2	781.894	0.19	QAQIEAQYDDLLR	55.911	1e-08	278414	APIS MELLIFERA	PREDICTED: similar to Spectrin alpha chain
[2]		66513649	45	20.8	5.37	2.1e-09	1420.29	710.65	2	710.378	0.27	IESIAQAADQFVK	60.553	2.3e-08	278414	APIS MELLIFERA	PREDICTED: similar to Spectrin alpha chain
[2]		66513649	45	20.8	5.37	2.1e-09	1476.67	738.84	2	738.863	-0.023	LQEASQQQQFNR	40.391	9.2e-08	278414	APIS MELLIFERA	PREDICTED: similar to Spectrin alpha chain
[2]		66513649	45	20.8	5.37	2.1e-09	1312.15	656.58	2	655.815	0.77	ADSFDATTLAGNK	47.673	1.2e-07	278414	APIS MELLIFERA	PREDICTED: similar to Spectrin alpha chain
[2]		66513649	45	20.8	5.37	2.1e-09	1500.35	750.68	2	750.353	0.33	HQNFEQELNANR	45.582	1.8e-07	278414	APIS MELLIFERA	PREDICTED: similar to Spectrin alpha chain
[2]		66513649	45	20.8	5.37	2.1e-09	1267.15	634.08	2	633.784	0.3	DLVSWMNDMR	64.783	2.1e-07	278414	APIS MELLIFERA	PREDICTED: similar to Spectrin alpha chain
[2]		66513649	45	20.8	5.37	2.1e-09	1363.21	682.11	2	681.825	0.29	VEEEEAWITEK	49.704	2.4e-07	278414	APIS MELLIFERA	PREDICTED: similar to Spectrin alpha chain
[2]		66513649	45	20.8	5.37	2.1e-09	1266.15	633.58	2	633.277	0.3	DTEQADAWMAK	46.801	3.5e-07	278414	APIS MELLIFERA	PREDICTED: similar to Spectrin alpha chain
[2]		66513649	45	20.8	5.37	2.1e-09	1209.71	605.36	2	605.291	0.069	DVVLSSDDFGR	50.603	1.2e-06	278414	APIS MELLIFERA	PREDICTED: similar to Spectrin alpha chain
[2]		66513649	45	20.8	5.37	2.1e-09	1556.31	778.66	2	778.404	0.26	LDESLTYQQFLAK	58.149	1.6e-06	278414	APIS MELLIFERA	PREDICTED: similar to Spectrin alpha chain
[2]		66513649	45	20.8	5.37	2.1e-09	1632.39	816.7	2	816.441	0.26	RAEILQSWESLTAK	58.952	1.7e-06	278414	APIS MELLIFERA	PREDICTED: similar to Spectrin alpha chain
[2]		66513649	45	20.8	5.37	2.1e-09	1462.25	731.63	2	731.365	0.27	EINEEWTQLTAK	54.387	1.8e-06	278414	APIS MELLIFERA	PREDICTED: similar to Spectrin alpha chain
[2]		66513649	45	20.8	5.37	2.1e-09	1700.63	850.82	2	850.438	0.38	LMDVSNLGVPEIEQR	59.698	2.6e-06	278414	APIS MELLIFERA	PREDICTED: similar to Spectrin alpha chain
[2]		66513649	45	20.8	5.37	2.1e-09	1451.55	726.28	2	726.338	-0.058	DADELEGWIFEK	64.929	2.9e-06	278414	APIS MELLIFERA	PREDICTED: similar to Spectrin alpha chain
[2]		66513649	45	20.8	5.37	2.1e-09	1380.13	690.57	2	690.311	0.26	DADETMAWIAEK	55.694	3.8e-06	278414	APIS MELLIFERA	PREDICTED: similar to Spectrin alpha chain
[2]		66513649	45	20.8	5.37	2.1e-09	1146.11	573.56	2	573.275	0.28	DAALNNDDLGK	40.273	5e-06	278414	APIS MELLIFERA	PREDICTED: similar to Spectrin alpha chain
[2]		66513649	45	20.8	5.37	2.1e-09	1330.19	665.6	2	665.354	0.25	IQTQIQDLNEK	46.435	5.3e-06	278414	APIS MELLIFERA	PREDICTED: similar to Spectrin alpha chain
[2]		66513649	45	20.8	5.37	2.1e-09	1218.59	609.8	2	609.851	-0.051	DLSTVQTLLTK	58.727	1.2e-05	278414	APIS MELLIFERA	PREDICTED: similar to Spectrin alpha chain
[2]		66513649	45	20.8	5.37	2.1e-09	1131.11	566.06	2	565.296	0.76	DVAGAEALVER	49.737	1.3e-05	278414	APIS MELLIFERA	PREDICTED: similar to Spectrin alpha chain
[2]		66513649	45	20.8	5.37	2.1e-09	1688.64	563.55	3	562.941	0.61	LIEGEHYAADDVAQR	45.767	1.8e-05	278414	APIS MELLIFERA	PREDICTED: similar to Spectrin alpha chain
[2]		66513649	45	20.8	5.37	2.1e-09	1223.37	612.19	2	611.825	0.37	KLLVGSDDYGR	44.576	1.8e-05	278414	APIS MELLIFERA	PREDICTED: similar to Spectrin alpha chain
[2]		66513649	45	20.8	5.37	2.1e-09	1131.51	566.26	2	566.306	-0.046	EAAELATWIK	55.79	2e-05	278414	APIS MELLIFERA	PREDICTED: similar to Spectrin alpha chain
[2]		66513649	45	20.8	5.37	2.1e-09	1145.57	573.29	2	573.312	-0.022	DLTSVQNLQK	46.669	2.1e-05	278414	APIS MELLIFERA	PREDICTED: similar to Spectrin alpha chain
[2]		66513649	45	20.8	5.37	2.1e-09	1277.29	639.15	2	638.812	0.34	DVDETKDWIR	47.994	2.6e-05	278414	APIS MELLIFERA	PREDICTED: similar to Spectrin alpha chain
[2]		66513649	45	20.8	5.37	2.1e-09	1104.19	552.6	2	552.259	0.34	SGHFDADNIK	31.159	3.1e-05	278414	APIS MELLIFERA	PREDICTED: similar to Spectrin alpha chain
[2]		66513649	45	20.8	5.37	2.1e-09	1120.09	560.55	2	559.797	0.75	DLASVQNLMK	55.336	4e-05	278414	APIS MELLIFERA	PREDICTED: similar to Spectrin alpha chain
[2]		66513649	45	20.8	5.37	2.1e-09	1403.93	702.47	2	701.844	0.63	EKDAALNNDDLGK	34.024	5.8e-05	278414	APIS MELLIFERA	PREDICTED: similar to Spectrin alpha chain
[2]		66513649	45	20.8	5.37	2.1e-09	1118.49	559.75	2	559.29	0.46	VTEVNELADK	43.541	5.9e-05	278414	APIS MELLIFERA	PREDICTED: similar to Spectrin alpha chain
[2]		66513649	45	20.8	5.37	2.1e-09	1356.01	678.51	2	678.344	0.17	ILENPEDIQER	47.386	6.2e-05	278414	APIS MELLIFERA	PREDICTED: similar to Spectrin alpha chain
[2]		66513649	45	20.8	5.37	2.1e-09	1186.27	593.64	2	593.335	0.31	LLNQAWAELK	56.781	6.5e-05	278414	APIS MELLIFERA	PREDICTED: similar to Spectrin alpha chain
[2]		66513649	45	20.8	5.37	2.1e-09	1148.15	574.58	2	574.283	0.3	NQSGVSEDALK	35.848	8.1e-05	278414	APIS MELLIFERA	PREDICTED: similar to Spectrin alpha chain
[2]		66513649	45	20.8	5.37	2.1e-09	1381.45	691.23	2	690.867	0.36	LAALDEHWGQLK	53.973	0.00012	278414	APIS MELLIFERA	PREDICTED: similar to Spectrin alpha chain
[2]		66513649	45	20.8	5.37	2.1e-09	1127.79	564.4	2	564.325	0.075	DLIGVQNLQK	51.176	0.00014	278414	APIS MELLIFERA	PREDICTED: similar to Spectrin alpha chain
[2]		66513649	45	20.8	5.37	2.1e-09	1131.15	566.08	2	565.814	0.27	QSLLNLWEK	60.777	0.00052	278414	APIS MELLIFERA	PREDICTED: similar to Spectrin alpha chain
[2]		66513649	45	20.8	5.37	2.1e-09	1355.15	678.08	2	677.866	0.21	QIEELYLTFAK	61.321	0.00063	278414	APIS MELLIFERA	PREDICTED: similar to Spectrin alpha chain
[2]		66513649	45	20.8	5.37	2.1e-09	1276.39	638.7	2	638.296	0.4	DIEDEEAWIR	54.461	0.00072	278414	APIS MELLIFERA	PREDICTED: similar to Spectrin alpha chain
[2]		66513649	45	20.8	5.37	2.1e-09	1195.47	598.24	2	598.291	-0.051	LDESYYLHR	46.586	0.00084	278414	APIS MELLIFERA	PREDICTED: similar to Spectrin alpha chain
[2]		66513649	45	20.8	5.37	2.1e-09	1734.45	578.82	3	578.61	0.21	LMQSHPETAEQTYAK	42.659	0.00095	278414	APIS MELLIFERA	PREDICTED: similar to Spectrin alpha chain
[2]		66513649	45	20.8	5.37	2.1e-09	1883.07	628.36	3	627.995	0.36	TERPITGALDYIEFTR	61.731	0.0021	278414	APIS MELLIFERA	PREDICTED: similar to Spectrin alpha chain
[2]		66513649	45	20.8	5.37	2.1e-09	1677.24	559.75	3	559.609	0.14	Q(Gln->pyro-Glu)EYRVTEVNELADK	43.541	0.0062	278414	APIS MELLIFERA	PREDICTED: similar to Spectrin alpha chain
[2]		66513649	45	20.8	5.37	2.1e-09	1734.33	578.78	3	578.96	-0.18	KGDTLTLLNSNNKDW(Oxidation)	48.279	0.019	278414	APIS MELLIFERA	PREDICTED: similar to Spectrin alpha chain
[2]		66513649	45	20.8	5.37	2.1e-09	1748.49	583.5	3	583.942	-0.44	LM(Oxidation)QSHPETAEQTYAK	39.896	0.03	278414	APIS MELLIFERA	PREDICTED: similar to Spectrin alpha chain
[2]		66513649	45	20.8	5.37	2.1e-09	2007.03	669.68	3	669.651	0.029	TDEIM(Oxidation)SLWESLTHATEK	72.282	0.034	278414	APIS MELLIFERA	PREDICTED: similar to Spectrin alpha chain
[3]		110758758	33	12.1	4.89	4.2e-09	1902.33	951.67	2	951.464	0.21	ENVNQGLVSGNTDAEAGVK	47.222	4.2e-09	374763	APIS MELLIFERA	PREDICTED: similar to Retinoid- and fatty-acid binding protein CG11064-PA isoform 1
[3]		110758758	33	12.1	4.89	4.2e-09	1622.39	811.7	2	810.915	0.78	ALGNSQFLDDATLQK	55.23	9.6e-09	374763	APIS MELLIFERA	PREDICTED: similar to Retinoid- and fatty-acid binding protein CG11064-PA isoform 1
[3]		110758758	33	12.1	4.89	4.2e-09	1639.51	820.26	2	819.922	0.34	FEEGKPIISYQEAK	48.874	2.3e-08	374763	APIS MELLIFERA	PREDICTED: similar to Retinoid- and fatty-acid binding protein CG11064-PA isoform 1
[3]		110758758	33	12.1	4.89	4.2e-09	1338.33	669.67	2	669.393	0.28	SPNPSGVLVLNLK	58.063	1.1e-07	374763	APIS MELLIFERA	PREDICTED: similar to Retinoid- and fatty-acid binding protein CG11064-PA isoform 1
[3]		110758758	33	12.1	4.89	4.2e-09	1256.59	628.8	2	628.828	-0.028	ADNPTVTVSQPK	42.355	1.3e-07	374763	APIS MELLIFERA	PREDICTED: similar to Retinoid- and fatty-acid binding protein CG11064-PA isoform 1
[3]		110758758	33	12.1	4.89	4.2e-09	1364.53	682.77	2	682.359	0.41	IADSLVNVEFEK	55.578	1.3e-07	374763	APIS MELLIFERA	PREDICTED: similar to Retinoid- and fatty-acid binding protein CG11064-PA isoform 1
[3]		110758758	33	12.1	4.89	4.2e-09	1407.47	704.24	2	703.873	0.37	NIHAEIANQPTAK	41.902	1.6e-07	374763	APIS MELLIFERA	PREDICTED: similar to Retinoid- and fatty-acid binding protein CG11064-PA isoform 1
[3]		110758758	33	12.1	4.89	4.2e-09	1530.29	765.65	2	765.399	0.25	SSPLLGSQQSIEQR	47.878	8.1e-07	374763	APIS MELLIFERA	PREDICTED: similar to Retinoid- and fatty-acid binding protein CG11064-PA isoform 1
[3]		110758758	33	12.1	4.89	4.2e-09	1339.25	670.13	2	669.849	0.28	SATLVLDGQYGSK	48.934	9.9e-07	374763	APIS MELLIFERA	PREDICTED: similar to Retinoid- and fatty-acid binding protein CG11064-PA isoform 1
[3]		110758758	33	12.1	4.89	4.2e-09	1198.61	599.81	2	599.751	0.059	HDQMEYYGR	27.535	2.2e-06	374763	APIS MELLIFERA	PREDICTED: similar to Retinoid- and fatty-acid binding protein CG11064-PA isoform 1
[3]		110758758	33	12.1	4.89	4.2e-09	1286.35	643.68	2	643.367	0.31	SPFPISLQQLR	61.58	5.4e-06	374763	APIS MELLIFERA	PREDICTED: similar to Retinoid- and fatty-acid binding protein CG11064-PA isoform 1
[3]		110758758	33	12.1	4.89	4.2e-09	1268.27	634.64	2	634.325	0.31	NFNFLELNTR	60.81	1.4e-05	374763	APIS MELLIFERA	PREDICTED: similar to Retinoid- and fatty-acid binding protein CG11064-PA isoform 1
[3]		110758758	33	12.1	4.89	4.2e-09	1208.63	604.82	2	604.83	-0.0097	LKYEGELTQK	43.276	1.6e-05	374763	APIS MELLIFERA	PREDICTED: similar to Retinoid- and fatty-acid binding protein CG11064-PA isoform 1
[3]		110758758	33	12.1	4.89	4.2e-09	1232.11	616.56	2	616.361	0.2	LGYLGVGQVIGR	56.713	2.6e-05	374763	APIS MELLIFERA	PREDICTED: similar to Retinoid- and fatty-acid binding protein CG11064-PA isoform 1
[3]		110758758	33	12.1	4.89	4.2e-09	1333.69	667.35	2	667.372	-0.022	LDNVDLQLLYK	59.717	3.6e-05	374763	APIS MELLIFERA	PREDICTED: similar to Retinoid- and fatty-acid binding protein CG11064-PA isoform 1
[3]		110758758	33	12.1	4.89	4.2e-09	1417.25	709.13	2	708.836	0.29	ITESGTEFGNAYK	46.38	3.7e-05	374763	APIS MELLIFERA	PREDICTED: similar to Retinoid- and fatty-acid binding protein CG11064-PA isoform 1
[3]		110758758	33	12.1	4.89	4.2e-09	1636.51	818.76	2	818.412	0.35	QIGFGTFFTYNNVK	64.731	9.5e-05	374763	APIS MELLIFERA	PREDICTED: similar to Retinoid- and fatty-acid binding protein CG11064-PA isoform 1
[3]		110758758	33	12.1	4.89	4.2e-09	1861.8	621.27	3	621.031	0.24	IYSSLVAAVQSIVALAQK	82.071	0.00017	374763	APIS MELLIFERA	PREDICTED: similar to Retinoid- and fatty-acid binding protein CG11064-PA isoform 1
[3]		110758758	33	12.1	4.89	4.2e-09	1105.17	553.09	2	552.789	0.3	INDMNELKK	35.488	0.00023	374763	APIS MELLIFERA	PREDICTED: similar to Retinoid- and fatty-acid binding protein CG11064-PA isoform 1
[3]		110758758	33	12.1	4.89	4.2e-09	1320.93	660.97	2	660.338	0.63	EMITPLMSELR	60.732	0.00033	374763	APIS MELLIFERA	PREDICTED: similar to Retinoid- and fatty-acid binding protein CG11064-PA isoform 1
[3]		110758758	33	12.1	4.89	4.2e-09	1244.25	622.63	2	622.336	0.29	NGNDVQISVIGK	48.385	0.00062	374763	APIS MELLIFERA	PREDICTED: similar to Retinoid- and fatty-acid binding protein CG11064-PA isoform 1
[3]		110758758	33	12.1	4.89	4.2e-09	1108.53	554.77	2	554.298	0.47	SISITVTSDGK	46.395	0.00094	374763	APIS MELLIFERA	PREDICTED: similar to Retinoid- and fatty-acid binding protein CG11064-PA isoform 1
[3]		110758758	33	12.1	4.89	4.2e-09	1265.13	633.07	2	632.796	0.27	YSFNNELSYK	50.859	0.001	374763	APIS MELLIFERA	PREDICTED: similar to Retinoid- and fatty-acid binding protein CG11064-PA isoform 1
[3]		110758758	33	12.1	4.89	4.2e-09	1129.35	565.18	2	565.314	-0.13	SNSLELKPGGK	32.791	0.0011	374763	APIS MELLIFERA	PREDICTED: similar to Retinoid- and fatty-acid binding protein CG11064-PA isoform 1
[3]		110758758	33	12.1	4.89	4.2e-09	1260.15	630.58	2	630.825	-0.25	LVSGNTDAEAGVK	39.557	0.0032	374763	APIS MELLIFERA	PREDICTED: similar to Retinoid- and fatty-acid binding protein CG11064-PA isoform 1
[3]		110758758	33	12.1	4.89	4.2e-09	1114.27	557.64	2	557.266	0.37	NDIM(Oxidation)SVYQK	42.009	0.0042	374763	APIS MELLIFERA	PREDICTED: similar to Retinoid- and fatty-acid binding protein CG11064-PA isoform 1
[3]		110758758	33	12.1	4.89	4.2e-09	1929.03	643.68	3	643.34	0.34	ANPCEKSPFPISLQQLR	61.58	0.005	374763	APIS MELLIFERA	PREDICTED: similar to Retinoid- and fatty-acid binding protein CG11064-PA isoform 1
[3]		110758758	33	12.1	4.89	4.2e-09	2451.48	817.83	3	817.071	0.76	ELSLLDNTPQVLNFEANDFNR	69.205	0.0054	374763	APIS MELLIFERA	PREDICTED: similar to Retinoid- and fatty-acid binding protein CG11064-PA isoform 1
[3]		110758758	33	12.1	4.89	4.2e-09	2185.17	729.06	3	728.704	0.36	QFLKPDFGYNTENIAELGK	61.031	0.0056	374763	APIS MELLIFERA	PREDICTED: similar to Retinoid- and fatty-acid binding protein CG11064-PA isoform 1
[3]		110758758	33	12.1	4.89	4.2e-09	1951.8	651.27	3	651.014	0.26	LELVSSLLDSDEKDLFK	68.909	0.013	374763	APIS MELLIFERA	PREDICTED: similar to Retinoid- and fatty-acid binding protein CG11064-PA isoform 1
[3]		110758758	33	12.1	4.89	4.2e-09	1757.73	586.58	3	586.289	0.29	DKTEYTYQAYIHPK	48.264	0.026	374763	APIS MELLIFERA	PREDICTED: similar to Retinoid- and fatty-acid binding protein CG11064-PA isoform 1
[3]		110758758	33	12.1	4.89	4.2e-09	1432.17	716.59	2	716.357	0.23	VLADREEDSEIR	41.924	0.034	374763	APIS MELLIFERA	PREDICTED: similar to Retinoid- and fatty-acid binding protein CG11064-PA isoform 1
[3]		110758758	33	12.1	4.89	4.2e-09	1123.23	562.12	2	561.793	0.33	LTDAYEAAIR	47.744	0.049	374763	APIS MELLIFERA	PREDICTED: similar to Retinoid- and fatty-acid binding protein CG11064-PA isoform 1
[4]		66547450	21	29.6	6.5	4.4e-11	1798.49	899.75	2	899.493	0.26	LQGVDILADAVAVTMGPK	73.08	4.4e-11	60413	APIS MELLIFERA	PREDICTED: similar to 60 kDa heat shock protein, mitochondrial precursor (Hsp60) (60 kDa chaperonin) (CPN60) (Heat shock protein 60) (HSP-60) (Mitochondrial matrix protein P1)
[4]		66547450	21	29.6	6.5	4.4e-11	2360.59	1180.8	2	1180.53	0.27	VSDGNLGYDALNDEYVDMIEK	63.773	1.1e-10	60413	APIS MELLIFERA	PREDICTED: similar to 60 kDa heat shock protein, mitochondrial precursor (Hsp60) (60 kDa chaperonin) (CPN60) (Heat shock protein 60) (HSP-60) (Mitochondrial matrix protein P1)
[4]		66547450	21	29.6	6.5	4.4e-11	1513.61	757.31	2	757.382	-0.072	TLHDELEVIEGMK	60.046	2e-09	60413	APIS MELLIFERA	PREDICTED: similar to 60 kDa heat shock protein, mitochondrial precursor (Hsp60) (60 kDa chaperonin) (CPN60) (Heat shock protein 60) (HSP-60) (Mitochondrial matrix protein P1)
[4]		66547450	21	29.6	6.5	4.4e-11	1556.75	778.88	2	778.921	-0.041	GVDILADAVAVTMGPK	68.971	1.4e-08	60413	APIS MELLIFERA	PREDICTED: similar to 60 kDa heat shock protein, mitochondrial precursor (Hsp60) (60 kDa chaperonin) (CPN60) (Heat shock protein 60) (HSP-60) (Mitochondrial matrix protein P1)
[4]		66547450	21	29.6	6.5	4.4e-11	1500.65	750.83	2	750.41	0.42	VDILADAVAVTMGPK	67.111	2.2e-08	60413	APIS MELLIFERA	PREDICTED: similar to 60 kDa heat shock protein, mitochondrial precursor (Hsp60) (60 kDa chaperonin) (CPN60) (Heat shock protein 60) (HSP-60) (Mitochondrial matrix protein P1)
[4]		66547450	21	29.6	6.5	4.4e-11	1539.37	770.19	2	769.909	0.28	VEFQDALLLFSEK	69.748	3.4e-08	60413	APIS MELLIFERA	PREDICTED: similar to 60 kDa heat shock protein, mitochondrial precursor (Hsp60) (60 kDa chaperonin) (CPN60) (Heat shock protein 60) (HSP-60) (Mitochondrial matrix protein P1)
[4]		66547450	21	29.6	6.5	4.4e-11	1926.53	963.77	2	963.536	0.23	ISSVQSIIPALELANSQR	65.431	3.6e-08	60413	APIS MELLIFERA	PREDICTED: similar to 60 kDa heat shock protein, mitochondrial precursor (Hsp60) (60 kDa chaperonin) (CPN60) (Heat shock protein 60) (HSP-60) (Mitochondrial matrix protein P1)
[4]		66547450	21	29.6	6.5	4.4e-11	1375.61	688.31	2	688.348	-0.038	GYISPYFINSSK	54.617	3.7e-08	60413	APIS MELLIFERA	PREDICTED: similar to 60 kDa heat shock protein, mitochondrial precursor (Hsp60) (60 kDa chaperonin) (CPN60) (Heat shock protein 60) (HSP-60) (Mitochondrial matrix protein P1)
[4]		66547450	21	29.6	6.5	4.4e-11	1233.59	617.3	2	617.302	-0.0015	VGGSSEVEVNEK	28.615	6.5e-08	60413	APIS MELLIFERA	PREDICTED: similar to 60 kDa heat shock protein, mitochondrial precursor (Hsp60) (60 kDa chaperonin) (CPN60) (Heat shock protein 60) (HSP-60) (Mitochondrial matrix protein P1)
[4]		66547450	21	29.6	6.5	4.4e-11	1668.03	834.52	2	834.437	0.083	Q(Gln->pyro-Glu)GVDILADAVAVTMGPK	75.559	1.2e-07	60413	APIS MELLIFERA	PREDICTED: similar to 60 kDa heat shock protein, mitochondrial precursor (Hsp60) (60 kDa chaperonin) (CPN60) (Heat shock protein 60) (HSP-60) (Mitochondrial matrix protein P1)
[4]		66547450	21	29.6	6.5	4.4e-11	1358.27	679.64	2	679.359	0.28	NVILEQSWGSPK	52.32	1.9e-07	60413	APIS MELLIFERA	PREDICTED: similar to 60 kDa heat shock protein, mitochondrial precursor (Hsp60) (60 kDa chaperonin) (CPN60) (Heat shock protein 60) (HSP-60) (Mitochondrial matrix protein P1)
[4]		66547450	21	29.6	6.5	4.4e-11	1643.29	822.15	2	821.384	0.77	DQIANTTSDYEKEK	43.164	9e-07	60413	APIS MELLIFERA	PREDICTED: similar to 60 kDa heat shock protein, mitochondrial precursor (Hsp60) (60 kDa chaperonin) (CPN60) (Heat shock protein 60) (HSP-60) (Mitochondrial matrix protein P1)
[4]		66547450	21	29.6	6.5	4.4e-11	1132.81	566.91	2	566.805	0.1	AIGNLISDAMK	57.268	1.1e-06	60413	APIS MELLIFERA	PREDICTED: similar to 60 kDa heat shock protein, mitochondrial precursor (Hsp60) (60 kDa chaperonin) (CPN60) (Heat shock protein 60) (HSP-60) (Mitochondrial matrix protein P1)
[4]		66547450	21	29.6	6.5	4.4e-11	1384.35	692.68	2	692.815	-0.13	DQIANTTSDYEK	42.37	5.9e-06	60413	APIS MELLIFERA	PREDICTED: similar to 60 kDa heat shock protein, mitochondrial precursor (Hsp60) (60 kDa chaperonin) (CPN60) (Heat shock protein 60) (HSP-60) (Mitochondrial matrix protein P1)
[4]		66547450	21	29.6	6.5	4.4e-11	1610.41	805.71	2	805.449	0.26	AAVEEGIVPGGGTALLR	56.684	9e-06	60413	APIS MELLIFERA	PREDICTED: similar to 60 kDa heat shock protein, mitochondrial precursor (Hsp60) (60 kDa chaperonin) (CPN60) (Heat shock protein 60) (HSP-60) (Mitochondrial matrix protein P1)
[4]		66547450	21	29.6	6.5	4.4e-11	2196.6	732.87	3	732.697	0.17	ADVIRDQIANTTSDYEKEK	50.618	0.0001	60413	APIS MELLIFERA	PREDICTED: similar to 60 kDa heat shock protein, mitochondrial precursor (Hsp60) (60 kDa chaperonin) (CPN60) (Heat shock protein 60) (HSP-60) (Mitochondrial matrix protein P1)
[4]		66547450	21	29.6	6.5	4.4e-11	2129.01	710.34	3	710.383	-0.043	ALMLQGVDILADAVAVTM(Oxidation)GPK	75.816	0.00023	60413	APIS MELLIFERA	PREDICTED: similar to 60 kDa heat shock protein, mitochondrial precursor (Hsp60) (60 kDa chaperonin) (CPN60) (Heat shock protein 60) (HSP-60) (Mitochondrial matrix protein P1)
[4]		66547450	21	29.6	6.5	4.4e-11	1149.23	575.12	2	574.803	0.32	AIGNLISDAM(Oxidation)K	50.777	0.0018	60413	APIS MELLIFERA	PREDICTED: similar to 60 kDa heat shock protein, mitochondrial precursor (Hsp60) (60 kDa chaperonin) (CPN60) (Heat shock protein 60) (HSP-60) (Mitochondrial matrix protein P1)
[4]		66547450	21	29.6	6.5	4.4e-11	2145.6	715.87	3	715.715	0.16	ALM(Oxidation)LQGVDILADAVAVTM(Oxidation)GPK	72.78	0.002	60413	APIS MELLIFERA	PREDICTED: similar to 60 kDa heat shock protein, mitochondrial precursor (Hsp60) (60 kDa chaperonin) (CPN60) (Heat shock protein 60) (HSP-60) (Mitochondrial matrix protein P1)
[4]		66547450	21	29.6	6.5	4.4e-11	2129.04	710.35	3	710.383	-0.033	ALM(Oxidation)LQGVDILADAVAVTMGPK	77.91	0.0095	60413	APIS MELLIFERA	PREDICTED: similar to 60 kDa heat shock protein, mitochondrial precursor (Hsp60) (60 kDa chaperonin) (CPN60) (Heat shock protein 60) (HSP-60) (Mitochondrial matrix protein P1)
[4]		66547450	21	29.6	6.5	4.4e-11	2112.78	704.93	3	705.051	-0.12	ALMLQGVDILADAVAVTMGPK	81.489	0.013	60413	APIS MELLIFERA	PREDICTED: similar to 60 kDa heat shock protein, mitochondrial precursor (Hsp60) (60 kDa chaperonin) (CPN60) (Heat shock protein 60) (HSP-60) (Mitochondrial matrix protein P1)
[5]		58585146	21	47.9	6.53	5.7e-11	1720.37	860.69	2	860.395	0.3	GEHTEAEGGIYDISNK	45.837	5.7e-11	40008.7	APIS MELLIFERA	arginine kinase
[5]		58585146	21	47.9	6.53	5.7e-11	2381.79	1191.4	2	1191.07	0.33	DFGDVDSLGNLDPANEFIVSTR	68.526	7.5e-11	40008.7	APIS MELLIFERA	arginine kinase
[5]		58585146	21	47.9	6.53	5.7e-11	1668.19	834.6	2	834.416	0.18	IISMQMGGDLGQVYR	58.311	1.3e-08	40008.7	APIS MELLIFERA	arginine kinase
[5]		58585146	21	47.9	6.53	5.7e-11	1391.63	696.32	2	695.836	0.48	DPIIEDYHGGFK	50.558	3.3e-08	40008.7	APIS MELLIFERA	arginine kinase
[5]		58585146	21	47.9	6.53	5.7e-11	1823.17	912.09	2	911.966	0.12	Acetyl-MVDQAVLDKLETGFSK	69.563	4.9e-08	40008.7	APIS MELLIFERA	arginine kinase
[5]		58585146	21	47.9	6.53	5.7e-11	1693.45	847.23	2	846.446	0.78	M(Met-loss+Acetyl)VDQAVLDKLETGFSK	69.235	5.8e-08	40008.7	APIS MELLIFERA	arginine kinase
[5]		58585146	21	47.9	6.53	5.7e-11	1766.59	883.8	2	883.425	0.37	DLFDPIIEDYHGGFK	65.023	5.9e-08	40008.7	APIS MELLIFERA	arginine kinase
[5]		58585146	21	47.9	6.53	5.7e-11	1202.05	601.53	2	601.3	0.23	GTFYPLTGMSK	53.419	1.3e-07	40008.7	APIS MELLIFERA	arginine kinase
[5]		58585146	21	47.9	6.53	5.7e-11	1538.45	769.73	2	769.37	0.36	FDPIIEDYHGGFK	56.087	7.4e-07	40008.7	APIS MELLIFERA	arginine kinase
[5]		58585146	21	47.9	6.53	5.7e-11	1255.75	628.38	2	628.321	0.059	EMHDGIAELIK	52.334	4.7e-06	40008.7	APIS MELLIFERA	arginine kinase
[5]		58585146	21	47.9	6.53	5.7e-11	1121.65	561.33	2	561.314	0.016	LGLTEYQAVK	49.622	6.6e-06	40008.7	APIS MELLIFERA	arginine kinase
[5]		58585146	21	47.9	6.53	5.7e-11	1565.03	783.02	2	782.399	0.62	M(Met-loss+Acetyl)VDQAVLDKLETGFS	70.686	2.5e-05	40008.7	APIS MELLIFERA	arginine kinase
[5]		58585146	21	47.9	6.53	5.7e-11	1320.37	660.69	2	660.356	0.33	VSSTLSGLEGELK	55.537	2.5e-05	40008.7	APIS MELLIFERA	arginine kinase
[5]		58585146	21	47.9	6.53	5.7e-11	1148.25	574.63	2	574.311	0.32	LIDDHFLFK	56.7	6.5e-05	40008.7	APIS MELLIFERA	arginine kinase
[5]		58585146	21	47.9	6.53	5.7e-11	1151.65	576.33	2	576.325	0.0054	LVHAVNEIEK	42.553	0.00015	40008.7	APIS MELLIFERA	arginine kinase
[5]		58585146	21	47.9	6.53	5.7e-11	1308.35	654.68	2	654.375	0.3	LVHAVNEIEKR	42.029	0.0006	40008.7	APIS MELLIFERA	arginine kinase
[5]		58585146	21	47.9	6.53	5.7e-11	1278.35	639.68	2	639.364	0.32	RLGLTEYQAVK	47.192	0.0016	40008.7	APIS MELLIFERA	arginine kinase
[5]		58585146	21	47.9	6.53	5.7e-11	1217.35	609.18	2	609.297	-0.12	GTFYPLTGM(Oxidation)SK	49.195	0.0043	40008.7	APIS MELLIFERA	arginine kinase
[5]		58585146	21	47.9	6.53	5.7e-11	1980.06	660.69	3	661.326	-0.64	EM(Oxidation)EEKVSSTLSGLEGELK	55.537	0.0055	40008.7	APIS MELLIFERA	arginine kinase
[5]		58585146	21	47.9	6.53	5.7e-11	1985.46	662.49	3	661.988	0.5	FADLFDPIIEDYHGGFK	68.949	0.0092	40008.7	APIS MELLIFERA	arginine kinase
[5]		58585146	21	47.9	6.53	5.7e-11	3339.82	835.71	4	836.398	-0.69	TFLVW(Dioxidation)CNEEDHLRIISMQMGGDLGQVYR	58.416	0.0097	40008.7	APIS MELLIFERA	arginine kinase
[6]		58585154	16	42.9	6.35	1.7e-10	1513.47	757.24	2	756.463	0.78	VLTTGLPALISWIK	101.557	1.7e-10	7584.9	APIS MELLIFERA	melittin precursor
[6]		58585154	16	42.9	6.35	1.7e-10	1529.51	765.26	2	764.461	0.8	VLTTGLPALISW(Oxidation)IK	67.469	5.3e-09	7584.9	APIS MELLIFERA	melittin precursor
[6]		58585154	16	42.9	6.35	1.7e-10	1342.29	671.65	2	670.856	0.79	AEADPEAGIGAVLK	54.5	7.2e-09	7584.9	APIS MELLIFERA	melittin precursor
[6]		58585154	16	42.9	6.35	1.7e-10	1544.39	772.7	2	772.458	0.24	VLTTGLPALISW(Dioxidation)IK	76.919	1.3e-08	7584.9	APIS MELLIFERA	melittin precursor
[6]		58585154	16	42.9	6.35	1.7e-10	1668.55	834.78	2	834.514	0.27	VLTTGLPALISWIKR	71.272	4e-08	7584.9	APIS MELLIFERA	melittin precursor
[6]		58585154	16	42.9	6.35	1.7e-10	1456.25	728.63	2	728.37	0.26	DAEADPEAGIGAVLK	55.465	8.4e-08	7584.9	APIS MELLIFERA	melittin precursor
[6]		58585154	16	42.9	6.35	1.7e-10	1700.61	850.81	2	850.509	0.3	VLTTGLPALISW(Dioxidation)IKR	70.412	3.2e-07	7584.9	APIS MELLIFERA	melittin precursor
[6]		58585154	16	42.9	6.35	1.7e-10	1445.27	723.14	2	722.924	0.22	LTTGLPALISW(Dioxidation)IK	72.965	3.7e-07	7584.9	APIS MELLIFERA	melittin precursor
[6]		58585154	16	42.9	6.35	1.7e-10	1413.75	707.38	2	706.929	0.45	LTTGLPALISWIK	72.658	6.6e-07	7584.9	APIS MELLIFERA	melittin precursor
[6]		58585154	16	42.9	6.35	1.7e-10	1332.71	666.86	2	666.382	0.48	TTGLPALISW(Dioxidation)IK	71.509	9.6e-07	7584.9	APIS MELLIFERA	melittin precursor
[6]		58585154	16	42.9	6.35	1.7e-10	1301.05	651.03	2	650.387	0.64	TTGLPALISWIK	70.177	4.2e-06	7584.9	APIS MELLIFERA	melittin precursor
[6]		58585154	16	42.9	6.35	1.7e-10	1199.23	600.12	2	599.863	0.26	TGLPALISWIK	70.369	1e-05	7584.9	APIS MELLIFERA	melittin precursor
[6]		58585154	16	42.9	6.35	1.7e-10	1456.21	728.61	2	728.438	0.17	TTGLPALISWIKR	71.018	2.9e-05	7584.9	APIS MELLIFERA	melittin precursor
[6]		58585154	16	42.9	6.35	1.7e-10	2505.36	835.79	3	836.176	-0.39	EAGIGAVLKVLTTGLPALISWIKR	71.16	0.00011	7584.9	APIS MELLIFERA	melittin precursor
[6]		58585154	16	42.9	6.35	1.7e-10	1140.51	570.76	2	570.817	-0.057	ADPEAGIGAVLK	52.535	0.00012	7584.9	APIS MELLIFERA	melittin precursor
[6]		58585154	16	42.9	6.35	1.7e-10	2380.98	794.33	3	794.805	-0.48	EAGIGAVLKVLTTGLPALISW(Dioxidation)IK	85.45	0.0012	7584.9	APIS MELLIFERA	melittin precursor
[7]		229892248	12	15.9	6.76	7.6e-12	1351.33	676.17	2	675.371	0.8	TLTILDSGIGMTK	58.795	7.6e-12	83384.3	APIS MELLIFERA	heat shock protein 90
[7]		229892248	12	15.9	6.76	7.6e-12	1372.07	686.54	2	685.802	0.74	EDQTEYLEESK	43.418	4.5e-07	83384.3	APIS MELLIFERA	heat shock protein 90
[7]		229892248	12	15.9	6.76	7.6e-12	1266.23	633.62	2	633.31	0.31	EQVANSSFVER	43.945	6.6e-07	83384.3	APIS MELLIFERA	heat shock protein 90
[7]		229892248	12	15.9	6.76	7.6e-12	1229.35	615.18	2	614.848	0.33	ADLVNNLGTIAK	53.162	1.7e-06	83384.3	APIS MELLIFERA	heat shock protein 90
[7]		229892248	12	15.9	6.76	7.6e-12	1366.03	683.52	2	683.368	0.15	TLTILDSGIGM(Oxidation)TK	55.287	4.3e-06	83384.3	APIS MELLIFERA	heat shock protein 90
[7]		229892248	12	15.9	6.76	7.6e-12	1275.41	638.21	2	638.325	-0.11	ELISNASDALDK	49.157	5.7e-06	83384.3	APIS MELLIFERA	heat shock protein 90
[7]		229892248	12	15.9	6.76	7.6e-12	1140.87	570.94	2	570.756	0.18	YTEDEELNK	27.053	2.1e-05	83384.3	APIS MELLIFERA	heat shock protein 90
[7]		229892248	12	15.9	6.76	7.6e-12	1190.19	595.6	2	595.322	0.28	HSQFIGYPIK	49.028	3.1e-05	83384.3	APIS MELLIFERA	heat shock protein 90
[7]		229892248	12	15.9	6.76	7.6e-12	1238.37	619.69	2	619.812	-0.12	HIYYITGESR	44.228	6.3e-05	83384.3	APIS MELLIFERA	heat shock protein 90
[7]		229892248	12	15.9	6.76	7.6e-12	1398.25	699.63	2	699.325	0.3	EKYTEDEELNK	35.075	0.0015	83384.3	APIS MELLIFERA	heat shock protein 90
[7]		229892248	12	15.9	6.76	7.6e-12	1327.99	664.5	2	664.317	0.18	TNDWEDHLAVK	48.95	0.0029	83384.3	APIS MELLIFERA	heat shock protein 90
[7]		229892248	12	15.9	6.76	7.6e-12	1513.95	757.48	2	757.396	0.084	GVVDSEDLPLNISR	56.522	0.0052	83384.3	APIS MELLIFERA	heat shock protein 90
[8]		66521738	11	22.9	5.79	5.7e-09	1712.01	856.51	2	856.422	0.088	MLGYEDPQFTELLR	65.248	5.7e-09	51930.5	APIS MELLIFERA	PREDICTED: similar to lethal (1) G0030 CG3861-PA, isoform A
[8]		66521738	11	22.9	5.79	5.7e-09	1727.67	864.34	2	864.419	-0.079	M(Oxidation)LGYEDPQFTELLR	62.971	6e-09	51930.5	APIS MELLIFERA	PREDICTED: similar to lethal (1) G0030 CG3861-PA, isoform A
[8]		66521738	11	22.9	5.79	5.7e-09	1440.11	720.56	2	720.391	0.17	SGQVVPGYGHAVLR	47.594	1.1e-08	51930.5	APIS MELLIFERA	PREDICTED: similar to lethal (1) G0030 CG3861-PA, isoform A
[8]		66521738	11	22.9	5.79	5.7e-09	1810.67	905.84	2	905.473	0.37	GLLWEPSVLDPEEGIR	66.789	1.3e-07	51930.5	APIS MELLIFERA	PREDICTED: similar to lethal (1) G0030 CG3861-PA, isoform A
[8]		66521738	11	22.9	5.79	5.7e-09	1103.97	552.49	2	551.835	0.66	LPSVAAIIYR	59.88	4.3e-07	51930.5	APIS MELLIFERA	PREDICTED: similar to lethal (1) G0030 CG3861-PA, isoform A
[8]		66521738	11	22.9	5.79	5.7e-09	1288.21	644.61	2	644.375	0.24	ALGVLSSLVWSR	65.861	3.2e-06	51930.5	APIS MELLIFERA	PREDICTED: similar to lethal (1) G0030 CG3861-PA, isoform A
[8]		66521738	11	22.9	5.79	5.7e-09	1468.33	734.67	2	734.359	0.31	GYEDPQFTELLR	59.804	1.6e-05	51930.5	APIS MELLIFERA	PREDICTED: similar to lethal (1) G0030 CG3861-PA, isoform A
[8]		66521738	11	22.9	5.79	5.7e-09	1579.41	790.21	2	789.885	0.33	EMNYYTVLFGVSR	65.835	3.9e-05	51930.5	APIS MELLIFERA	PREDICTED: similar to lethal (1) G0030 CG3861-PA, isoform A
[8]		66521738	11	22.9	5.79	5.7e-09	1376.25	688.63	2	688.315	0.32	EIGDSPSDEKVAE	42.71	0.00012	51930.5	APIS MELLIFERA	PREDICTED: similar to lethal (1) G0030 CG3861-PA, isoform A
[8]		66521738	11	22.9	5.79	5.7e-09	1341.25	671.13	2	670.838	0.29	EPSVLDPEEGIR	51.489	0.00013	51930.5	APIS MELLIFERA	PREDICTED: similar to lethal (1) G0030 CG3861-PA, isoform A
[8]		66521738	11	22.9	5.79	5.7e-09	3423.02	856.51	4	857.149	-0.64	SVDSSKDW(Oxidation)AW(Dioxidation)NFSRMLGYEDPQFTELLR	65.248	0.0028	51930.5	APIS MELLIFERA	PREDICTED: similar to lethal (1) G0030 CG3861-PA, isoform A
[9]		110762902	12	28.3	5.21	5e-09	1441.15	721.08	2	720.398	0.68	VALTGLTVAEYFR	65.452	5e-09	55130.7	APIS MELLIFERA	PREDICTED: similar to ATP synthase- CG11154-PA, isoform A
[9]		110762902	12	28.3	5.21	5e-09	1678.47	839.74	2	839.468	0.27	LVLEVAQHLGENTVR	55.642	5.2e-09	55130.7	APIS MELLIFERA	PREDICTED: similar to ATP synthase- CG11154-PA, isoform A
[9]		110762902	12	28.3	5.21	5e-09	1292.25	646.63	2	646.336	0.29	GQSVLDSGYPIR	50.73	2.7e-08	55130.7	APIS MELLIFERA	PREDICTED: similar to ATP synthase- CG11154-PA, isoform A
[9]		110762902	12	28.3	5.21	5e-09	1458.37	729.69	2	729.423	0.27	TVLIMELINNVAK	73.521	7.9e-08	55130.7	APIS MELLIFERA	PREDICTED: similar to ATP synthase- CG11154-PA, isoform A
[9]		110762902	12	28.3	5.21	5e-09	1367.47	684.24	2	684.38	-0.14	IINVIGEPIDER	54.475	2.3e-07	55130.7	APIS MELLIFERA	PREDICTED: similar to ATP synthase- CG11154-PA, isoform A
[9]		110762902	12	28.3	5.21	5e-09	1288.39	644.7	2	644.846	-0.15	TQAGSEVSALLGR	54.633	4.2e-07	55130.7	APIS MELLIFERA	PREDICTED: similar to ATP synthase- CG11154-PA, isoform A
[9]		110762902	12	28.3	5.21	5e-09	1262.41	631.71	2	631.824	-0.11	TIAMDGTEGLVR	50.873	5.7e-06	55130.7	APIS MELLIFERA	PREDICTED: similar to ATP synthase- CG11154-PA, isoform A
[9]		110762902	12	28.3	5.21	5e-09	1142.33	571.67	2	571.296	0.37	NVIGEPIDER	46.049	0.0002	55130.7	APIS MELLIFERA	PREDICTED: similar to ATP synthase- CG11154-PA, isoform A
[9]		110762902	12	28.3	5.21	5e-09	1173.17	587.09	2	586.323	0.77	MVGPIEEVVAK	52.654	0.00078	55130.7	APIS MELLIFERA	PREDICTED: similar to ATP synthase- CG11154-PA, isoform A
[9]		110762902	12	28.3	5.21	5e-09	1320.35	660.68	2	660.825	-0.15	YPAVDPLDSTSR	49.839	0.0014	55130.7	APIS MELLIFERA	PREDICTED: similar to ATP synthase- CG11154-PA, isoform A
[9]		110762902	12	28.3	5.21	5e-09	1814.13	605.38	3	604.974	0.41	IMDPNIIGAEHYNVAR	53.728	0.0052	55130.7	APIS MELLIFERA	PREDICTED: similar to ATP synthase- CG11154-PA, isoform A
[9]		110762902	12	28.3	5.21	5e-09	1816.8	606.27	3	605.985	0.29	LSQPFQVAEVFTGHAGK	61.074	0.0052	55130.7	APIS MELLIFERA	PREDICTED: similar to ATP synthase- CG11154-PA, isoform A
[10]		11935049	13	23.3	4.7	1.7e-07	1477.33	739.17	2	738.378	0.79	WELLQQVDTSTR	57.726	1.7e-07	66067.2	HOMO SAPIENS	keratin 1
[10]		11935049	13	23.3	4.7	1.7e-07	1125.81	563.41	2	563.275	0.14	AEAESLYQSK	37.812	1.2e-06	66067.2	HOMO SAPIENS	keratin 1
[10]		11935049	13	23.3	4.7	1.7e-07	1304.27	652.64	2	651.861	0.78	SLDLDSIIAEVK	67.427	2.1e-06	66067.2	HOMO SAPIENS	keratin 1
[10]		11935049	13	23.3	4.7	1.7e-07	1384.07	692.54	2	692.349	0.19	SLNNQFASFIDK	58.645	2.2e-06	66067.2	HOMO SAPIENS	keratin 1
[10]		11935049	13	23.3	4.7	1.7e-07	1180.21	590.61	2	590.304	0.31	YEELQITAGR	48.18	4.4e-06	66067.2	HOMO SAPIENS	keratin 1
[10]		11935049	13	23.3	4.7	1.7e-07	1342.17	671.59	2	670.838	0.75	SKAEAESLYQSK	33.206	4.8e-06	66067.2	HOMO SAPIENS	keratin 1
[10]		11935049	13	23.3	4.7	1.7e-07	1475.67	738.34	2	738.396	-0.056	FLEQQNQVLQTK	48.634	9e-06	66067.2	HOMO SAPIENS	keratin 1
[10]		11935049	13	23.3	4.7	1.7e-07	1158.19	579.6	2	579.261	0.34	DYQELM(Oxidation)NTK	39.123	6.5e-05	66067.2	HOMO SAPIENS	keratin 1
[10]		11935049	13	23.3	4.7	1.7e-07	1718.23	859.62	2	858.929	0.69	QISNLQQSISDAEQR	51.779	0.0031	66067.2	HOMO SAPIENS	keratin 1
[10]		11935049	13	23.3	4.7	1.7e-07	2455.82	614.71	4	614.781	-0.071	GYRGGSGGGGGGSSGGRGSGGGSSGGSIGGR	61.198	0.01	66067.2	HOMO SAPIENS	keratin 1
[10]		11935049	13	23.3	4.7	1.7e-07	1979.04	660.35	3	660.291	0.059	GGRFSSCGGGGGSFGAGGGFGSR	38.172	0.04	66067.2	HOMO SAPIENS	keratin 1
[10]		11935049	13	23.3	4.7	1.7e-07	2224.46	556.87	4	556.747	0.12	GGSGGGGGGSSGGRGSGGGSSGGSIGGRGS	99.752	0.049	66067.2	HOMO SAPIENS	keratin 1
[10]		11935049	13	23.3	4.7	1.7e-07	2398.5	800.17	3	800.365	-0.19	YRGGSGGGGGGSSGGRGSGGGSSGGSIGGR	59.137	0.05	66067.2	HOMO SAPIENS	keratin 1
[11]		12585365	12	23.9	4.96	1.7e-08	1858.59	929.8	2	929.474	0.33	MSATFIGNSTAIQELFK	69.313	1.7e-08	50230.9	MANSE	RecName: Full=Tubulin beta-1 chain; AltName: Full=Beta-1-tubulin
[11]		12585365	12	23.9	4.96	1.7e-08	1698.35	849.68	2	848.92	0.76	NSSYFVEWIPNNVK	62.792	1.6e-07	50230.9	MANSE	RecName: Full=Tubulin beta-1 chain; AltName: Full=Beta-1-tubulin
[11]		12585365	12	23.9	4.96	1.7e-08	1320.49	660.75	2	660.861	-0.11	IGNSTAIQELFK	59.457	3.3e-07	50230.9	MANSE	RecName: Full=Tubulin beta-1 chain; AltName: Full=Beta-1-tubulin
[11]		12585365	12	23.9	4.96	1.7e-08	1461.11	731.06	2	730.856	0.2	EVDEQMLNIQNK	50.08	3.1e-06	50230.9	MANSE	RecName: Full=Tubulin beta-1 chain; AltName: Full=Beta-1-tubulin
[11]		12585365	12	23.9	4.96	1.7e-08	1144.31	572.66	2	572.321	0.34	LAVNMVPFPR	58.232	3.8e-06	50230.9	MANSE	RecName: Full=Tubulin beta-1 chain; AltName: Full=Beta-1-tubulin
[11]		12585365	12	23.9	4.96	1.7e-08	1170.11	585.56	2	585.281	0.28	HGDSDLQLER	36.547	2e-05	50230.9	MANSE	RecName: Full=Tubulin beta-1 chain; AltName: Full=Beta-1-tubulin
[11]		12585365	12	23.9	4.96	1.7e-08	1230.21	615.61	2	615.303	0.31	ISEQFTAMFR	58.178	2.3e-05	50230.9	MANSE	RecName: Full=Tubulin beta-1 chain; AltName: Full=Beta-1-tubulin
[11]		12585365	12	23.9	4.96	1.7e-08	1466.29	733.65	2	732.871	0.78	LHFFMPGFAPLTS	69.608	0.00052	50230.9	MANSE	RecName: Full=Tubulin beta-1 chain; AltName: Full=Beta-1-tubulin
[11]		12585365	12	23.9	4.96	1.7e-08	1131.17	566.09	2	565.801	0.29	FPGQLNADLR	51.792	0.00063	50230.9	MANSE	RecName: Full=Tubulin beta-1 chain; AltName: Full=Beta-1-tubulin
[11]		12585365	12	23.9	4.96	1.7e-08	1377.65	689.33	2	689.355	-0.025	LHFFMPGFAPLT	70.154	0.022	50230.9	MANSE	RecName: Full=Tubulin beta-1 chain; AltName: Full=Beta-1-tubulin
[11]		12585365	12	23.9	4.96	1.7e-08	1276.73	638.87	2	638.831	0.039	LHFFMPGFAPL	71.31	0.037	50230.9	MANSE	RecName: Full=Tubulin beta-1 chain; AltName: Full=Beta-1-tubulin
[11]		12585365	12	23.9	4.96	1.7e-08	1201.95	601.48	2	601.278	0.2	NVYYNEASGGK	32.286	0.037	50230.9	MANSE	RecName: Full=Tubulin beta-1 chain; AltName: Full=Beta-1-tubulin
[12]		66517710	10	8.6	6.53	1e-10	1573.39	787.2	2	786.941	0.26	IVQAPDGYIIGITGR	58.766	1e-10	161988	APIS MELLIFERA	PREDICTED: similar to tripeptidyl peptidase II
[12]		66517710	10	8.6	6.53	1e-10	1303.23	652.12	2	651.784	0.34	MPGMSYTWSSR	52.24	1.6e-06	161988	APIS MELLIFERA	PREDICTED: similar to tripeptidyl peptidase II
[12]		66517710	10	8.6	6.53	1e-10	1234.61	617.81	2	617.827	-0.017	IGTMETGTAVVR	46.134	2.4e-05	161988	APIS MELLIFERA	PREDICTED: similar to tripeptidyl peptidase II
[12]		66517710	10	8.6	6.53	1e-10	1261.31	631.16	2	630.829	0.33	IGELMNEVIDK	54.841	3e-05	161988	APIS MELLIFERA	PREDICTED: similar to tripeptidyl peptidase II
[12]		66517710	10	8.6	6.53	1e-10	1316.25	658.63	2	658.358	0.27	LTEMPFLLSHK	56.813	0.00013	161988	APIS MELLIFERA	PREDICTED: similar to tripeptidyl peptidase II
[12]		66517710	10	8.6	6.53	1e-10	1331.45	666.23	2	665.87	0.36	SSVQILKPTDSR	44.076	0.00016	161988	APIS MELLIFERA	PREDICTED: similar to tripeptidyl peptidase II
[12]		66517710	10	8.6	6.53	1e-10	1196.01	598.51	2	598.273	0.24	WDEYNEALR	48.219	0.0015	161988	APIS MELLIFERA	PREDICTED: similar to tripeptidyl peptidase II
[12]		66517710	10	8.6	6.53	1e-10	1946.25	649.42	3	648.947	0.47	KSSSSSSSSSSSSSYSSSNK	34.647	0.01	161988	APIS MELLIFERA	PREDICTED: similar to tripeptidyl peptidase II
[12]		66517710	10	8.6	6.53	1e-10	1728.24	576.75	3	576.629	0.12	VDGFNLPEGVHTTSVR	53.433	0.01	161988	APIS MELLIFERA	PREDICTED: similar to tripeptidyl peptidase II
[12]		66517710	10	8.6	6.53	1e-10	2203.41	735.14	3	734.395	0.74	RIGTMETGTAVVRAMIHVMK	56.438	0.024	161988	APIS MELLIFERA	PREDICTED: similar to tripeptidyl peptidase II
[13]		66513092	9	35.8	6.72	1.1e-10	1824.99	913	2	913.034	-0.034	VAILGASGGIGQPLSLLMK	70.618	1.1e-10	35801.9	APIS MELLIFERA	PREDICTED: similar to mitochondrial malate dehydrogenase precursor isoform 1
[13]		66513092	9	35.8	6.72	1.1e-10	1337.45	669.23	2	669.338	-0.11	DDLFSTNASIVR	54.988	4.1e-07	35801.9	APIS MELLIFERA	PREDICTED: similar to mitochondrial malate dehydrogenase precursor isoform 1
[13]		66513092	9	35.8	6.72	1.1e-10	1244.13	622.57	2	622.33	0.24	DLTQAIAEASPK	53.282	7.9e-07	35801.9	APIS MELLIFERA	PREDICTED: similar to mitochondrial malate dehydrogenase precursor isoform 1
[13]		66513092	9	35.8	6.72	1.1e-10	1306.35	653.68	2	653.343	0.34	NLGIGNLNAYEK	53.576	1.3e-05	35801.9	APIS MELLIFERA	PREDICTED: similar to mitochondrial malate dehydrogenase precursor isoform 1
[13]		66513092	9	35.8	6.72	1.1e-10	1220.29	610.65	2	610.356	0.29	VFGVTTLDIVR	60.9	9.2e-05	35801.9	APIS MELLIFERA	PREDICTED: similar to mitochondrial malate dehydrogenase precursor isoform 1
[13]		66513092	9	35.8	6.72	1.1e-10	1434.49	717.75	2	717.877	-0.13	AYTGPEELKDALK	51.521	0.00013	35801.9	APIS MELLIFERA	PREDICTED: similar to mitochondrial malate dehydrogenase precursor isoform 1
[13]		66513092	9	35.8	6.72	1.1e-10	1306.45	653.73	2	653.896	-0.17	GTQVVIIPAGVPR	54.531	0.00088	35801.9	APIS MELLIFERA	PREDICTED: similar to mitochondrial malate dehydrogenase precursor isoform 1
[13]		66513092	9	35.8	6.72	1.1e-10	2008.68	670.23	3	670.014	0.22	KPGMTRDDLFSTNASIVR	54.925	0.0088	35801.9	APIS MELLIFERA	PREDICTED: similar to mitochondrial malate dehydrogenase precursor isoform 1
[13]		66513092	9	35.8	6.72	1.1e-10	2412	804.67	3	804.468	0.2	AFIAIISNPVNSTVPIASEVLKK	68.833	0.011	35801.9	APIS MELLIFERA	PREDICTED: similar to mitochondrial malate dehydrogenase precursor isoform 1
[14]		94158854	10	18.4	5.35	1e-08	1486.17	743.59	2	743.33	0.26	SFMDSNSDGIGDLK	53.757	1e-08	67357.8	APIS MELLIFERA	alpha glucosidase 2
[14]		94158854	10	18.4	5.35	1e-08	1564.43	782.72	2	782.378	0.34	YYEVGSNVPFNFK	58.486	2.4e-08	67357.8	APIS MELLIFERA	alpha glucosidase 2
[14]		94158854	10	18.4	5.35	1e-08	1712.51	856.76	2	856.407	0.35	TPFQWDNSINAGFSK	59.68	3.3e-08	67357.8	APIS MELLIFERA	alpha glucosidase 2
[14]		94158854	10	18.4	5.35	1e-08	1270.37	635.69	2	635.833	-0.14	NAIFYQVYPR	54.703	7.8e-07	67357.8	APIS MELLIFERA	alpha glucosidase 2
[14]		94158854	10	18.4	5.35	1e-08	1104.15	552.58	2	552.775	-0.19	DLEDLTAEAK	49.522	3e-06	67357.8	APIS MELLIFERA	alpha glucosidase 2
[14]		94158854	10	18.4	5.35	1e-08	1290.01	645.51	2	645.801	-0.29	Q(Gln->pyro-Glu)FYFHQFYK	60.196	0.00037	67357.8	APIS MELLIFERA	alpha glucosidase 2
[14]		94158854	10	18.4	5.35	1e-08	1936.68	646.23	3	645.967	0.26	GTPQNNVPNWVMGNHDR	51.505	0.00086	67357.8	APIS MELLIFERA	alpha glucosidase 2
[14]		94158854	10	18.4	5.35	1e-08	1221.53	611.27	2	611.303	-0.034	DQPETYELVK	47.417	0.00087	67357.8	APIS MELLIFERA	alpha glucosidase 2
[14]		94158854	10	18.4	5.35	1e-08	1146.29	573.65	2	573.312	0.34	SGLNLEQEKK	28.015	0.0009	67357.8	APIS MELLIFERA	alpha glucosidase 2
[14]		94158854	10	18.4	5.35	1e-08	1308.43	654.72	2	654.314	0.41	QFYFHQFYK	54.045	0.004	67357.8	APIS MELLIFERA	alpha glucosidase 2
[15]		110764717	8	23.7	5.28	1.3e-09	1728.37	864.69	2	864.453	0.24	IQVGPVVDVLGDEMTR	64.015	1.3e-09	46646.7	APIS MELLIFERA	PREDICTED: similar to Isocitrate dehydrogenase CG7176-PC, isoform C isoform 2
[15]		110764717	8	23.7	5.28	1.3e-09	1361.37	681.19	2	680.846	0.34	LHTYDLSIENR	48.984	1.5e-08	46646.7	APIS MELLIFERA	PREDICTED: similar to Isocitrate dehydrogenase CG7176-PC, isoform C isoform 2
[15]		110764717	8	23.7	5.28	1.3e-09	1507.21	754.11	2	753.854	0.26	SDYLETFEFIDK	64.288	9.5e-08	46646.7	APIS MELLIFERA	PREDICTED: similar to Isocitrate dehydrogenase CG7176-PC, isoform C isoform 2
[15]		110764717	8	23.7	5.28	1.3e-09	1342.19	671.6	2	671.341	0.26	TVEAEAAHGTVTR	31.543	2e-06	46646.7	APIS MELLIFERA	PREDICTED: similar to Isocitrate dehydrogenase CG7176-PC, isoform C isoform 2
[15]		110764717	8	23.7	5.28	1.3e-09	1695.35	848.18	2	847.431	0.75	ETSTNPIASIFAWTR	71.964	2.6e-06	46646.7	APIS MELLIFERA	PREDICTED: similar to Isocitrate dehydrogenase CG7176-PC, isoform C isoform 2
[15]		110764717	8	23.7	5.28	1.3e-09	1446.39	723.7	2	723.367	0.33	LEITWIGDNEQK	56.974	2.6e-06	46646.7	APIS MELLIFERA	PREDICTED: similar to Isocitrate dehydrogenase CG7176-PC, isoform C isoform 2
[15]		110764717	8	23.7	5.28	1.3e-09	1135.99	568.5	2	568.322	0.18	IQHIVHNFK	34.214	0.00012	46646.7	APIS MELLIFERA	PREDICTED: similar to Isocitrate dehydrogenase CG7176-PC, isoform C isoform 2
[15]		110764717	8	23.7	5.28	1.3e-09	1194.27	597.64	2	597.295	0.34	DIFHEIYEK	54.94	0.00043	46646.7	APIS MELLIFERA	PREDICTED: similar to Isocitrate dehydrogenase CG7176-PC, isoform C isoform 2
[16]		66545506	9	23.1	5.47	2.9e-09	1962.57	981.79	2	981.494	0.3	SGTIFDNVLITDDPEVAR	64.073	2.9e-09	47174.5	APIS MELLIFERA	PREDICTED: similar to Calreticulin CG9429-PA isoform 1
[16]		66545506	9	23.1	5.47	2.9e-09	1216.49	608.75	2	608.791	-0.041	NWVYSEHPGK	43.295	3.7e-06	47174.5	APIS MELLIFERA	PREDICTED: similar to Calreticulin CG9429-PA isoform 1
[16]		66545506	9	23.1	5.47	2.9e-09	2668.78	667.95	4	667.328	0.62	GPWIHPEIDNPEYTPDPELYKR	57.971	8.7e-06	47174.5	APIS MELLIFERA	PREDICTED: similar to Calreticulin CG9429-PA isoform 1
[16]		66545506	9	23.1	5.47	2.9e-09	1121.17	561.09	2	560.829	0.26	KVHVIFSYK	46.118	2.1e-05	47174.5	APIS MELLIFERA	PREDICTED: similar to Calreticulin CG9429-PA isoform 1
[16]		66545506	9	23.1	5.47	2.9e-09	2121.72	707.91	3	707.659	0.25	FWNDPENDKGIQTSQDAR	48.674	0.00054	47174.5	APIS MELLIFERA	PREDICTED: similar to Calreticulin CG9429-PA isoform 1
[16]		66545506	9	23.1	5.47	2.9e-09	2510.46	837.49	3	837.401	0.089	GPWIHPEIDNPEYTPDPELYK	59.894	0.0025	47174.5	APIS MELLIFERA	PREDICTED: similar to Calreticulin CG9429-PA isoform 1
[16]		66545506	9	23.1	5.47	2.9e-09	1165.15	583.08	2	582.751	0.33	FWNDPENDK	45.506	0.012	47174.5	APIS MELLIFERA	PREDICTED: similar to Calreticulin CG9429-PA isoform 1
[16]		66545506	9	23.1	5.47	2.9e-09	1777.74	593.25	3	592.977	0.27	KFGEEVWKPTLEGEK	52.124	0.015	47174.5	APIS MELLIFERA	PREDICTED: similar to Calreticulin CG9429-PA isoform 1
[16]		66545506	9	23.1	5.47	2.9e-09	1906.47	636.16	3	635.675	0.48	KFGEEVWKPTLEGEKK	49.879	0.031	47174.5	APIS MELLIFERA	PREDICTED: similar to Calreticulin CG9429-PA isoform 1
[17]		110758259	11	10.6	4.24	3.5e-08	1555.29	778.15	2	777.883	0.27	EVDYIPWQTTFR	61.974	3.5e-08	105089	APIS MELLIFERA	PREDICTED: similar to CG14516-PA, isoform A, partial
[17]		110758259	11	10.6	4.24	3.5e-08	1253.93	627.47	2	627.31	0.16	NLNFLNTMMR	62.29	1.8e-06	105089	APIS MELLIFERA	PREDICTED: similar to CG14516-PA, isoform A, partial
[17]		110758259	11	10.6	4.24	3.5e-08	1272.43	636.72	2	636.833	-0.11	NSLLSFSSVYR	58.81	1.9e-06	105089	APIS MELLIFERA	PREDICTED: similar to CG14516-PA, isoform A, partial
[17]		110758259	11	10.6	4.24	3.5e-08	1312.89	656.95	2	656.865	0.085	AQLIDDALNLAR	61.637	4.8e-06	105089	APIS MELLIFERA	PREDICTED: similar to CG14516-PA, isoform A, partial
[17]		110758259	11	10.6	4.24	3.5e-08	1206.73	603.87	2	603.324	0.55	LPTDVVPSSYK	49.242	2.8e-05	105089	APIS MELLIFERA	PREDICTED: similar to CG14516-PA, isoform A, partial
[17]		110758259	11	10.6	4.24	3.5e-08	1196.07	598.54	2	598.291	0.25	VNYDKENWK	41.102	0.00031	105089	APIS MELLIFERA	PREDICTED: similar to CG14516-PA, isoform A, partial
[17]		110758259	11	10.6	4.24	3.5e-08	1111.33	556.17	2	556.293	-0.12	LFDNIAYQK	50.266	0.0012	105089	APIS MELLIFERA	PREDICTED: similar to CG14516-PA, isoform A, partial
[17]		110758259	11	10.6	4.24	3.5e-08	1124.21	562.61	2	562.285	0.32	ENVYEITQK	44.906	0.015	105089	APIS MELLIFERA	PREDICTED: similar to CG14516-PA, isoform A, partial
[17]		110758259	11	10.6	4.24	3.5e-08	1659.69	830.35	2	829.928	0.42	Q(Gln->pyro-Glu)WFGNLVSPKWWK	69.159	0.02	105089	APIS MELLIFERA	PREDICTED: similar to CG14516-PA, isoform A, partial
[17]		110758259	11	10.6	4.24	3.5e-08	1760.39	880.7	2	879.942	0.76	TTFRNLNFLNTMMR	63.501	0.024	105089	APIS MELLIFERA	PREDICTED: similar to CG14516-PA, isoform A, partial
[17]		110758259	11	10.6	4.24	3.5e-08	1776.63	592.88	3	592.296	0.58	TTFRNLNFLNTMM(Oxidation)R	115.457	0.048	105089	APIS MELLIFERA	PREDICTED: similar to CG14516-PA, isoform A, partial
[18]		48097086	7	30.4	5.49	3.1e-09	2158.47	1079.74	2	1079.49	0.25	QAFDDAIAELDTLNEDSYK	66.68	3.1e-09	28076.7	APIS MELLIFERA	PREDICTED: similar to 14-3-3-like protein (Leonardo protein) (14-3-3 zeta) isoform 1
[18]		48097086	7	30.4	5.49	3.1e-09	1534.15	767.58	2	767.373	0.21	AVTETGVELSNEER	45.912	7.3e-08	28076.7	APIS MELLIFERA	PREDICTED: similar to 14-3-3-like protein (Leonardo protein) (14-3-3 zeta) isoform 1
[18]		48097086	7	30.4	5.49	3.1e-09	1376.39	688.7	2	688.348	0.35	Acetyl-MSVDKEELVQR	49.568	6e-07	28076.7	APIS MELLIFERA	PREDICTED: similar to 14-3-3-like protein (Leonardo protein) (14-3-3 zeta) isoform 1
[18]		48097086	7	30.4	5.49	3.1e-09	1210.25	605.63	2	605.309	0.32	YLAEVATGETR	44.978	1.3e-06	28076.7	APIS MELLIFERA	PREDICTED: similar to 14-3-3-like protein (Leonardo protein) (14-3-3 zeta) isoform 1
[18]		48097086	7	30.4	5.49	3.1e-09	1244.63	622.82	2	622.828	-0.0077	M(Met-loss+Acetyl)SVDKEELVQR	46.499	1.3e-05	28076.7	APIS MELLIFERA	PREDICTED: similar to 14-3-3-like protein (Leonardo protein) (14-3-3 zeta) isoform 1
[18]		48097086	7	30.4	5.49	3.1e-09	1171.49	586.25	2	586.285	-0.035	AYQDAFEISK	49.042	0.00028	28076.7	APIS MELLIFERA	PREDICTED: similar to 14-3-3-like protein (Leonardo protein) (14-3-3 zeta) isoform 1
[18]		48097086	7	30.4	5.49	3.1e-09	1190.03	595.52	2	595.334	0.19	DSTLIMQLLR	68.039	0.0034	28076.7	APIS MELLIFERA	PREDICTED: similar to 14-3-3-like protein (Leonardo protein) (14-3-3 zeta) isoform 1
[19]		58585104	9	6.3	4.03	1.1e-07	1527.33	764.17	2	763.393	0.78	VEENEIIFEIYK	62.415	1.1e-07	201050	APIS MELLIFERA	vitellogenin
[19]		58585104	9	6.3	4.03	1.1e-07	1396.17	698.59	2	697.882	0.71	ILSVFEPYLEGK	63.623	1.6e-07	201050	APIS MELLIFERA	vitellogenin
[19]		58585104	9	6.3	4.03	1.1e-07	1223.17	612.09	2	611.827	0.26	SFFELLQNPK	61.917	2.6e-07	201050	APIS MELLIFERA	vitellogenin
[19]		58585104	9	6.3	4.03	1.1e-07	1634.23	817.62	2	817.443	0.18	DAITQTGTGPAFLTIK	58.535	1.1e-06	201050	APIS MELLIFERA	vitellogenin
[19]		58585104	9	6.3	4.03	1.1e-07	1638.53	819.77	2	819.372	0.4	TNEEMWELIDTEK	60.459	4.6e-06	201050	APIS MELLIFERA	vitellogenin
[19]		58585104	9	6.3	4.03	1.1e-07	1422.11	711.56	2	711.33	0.23	LPYPWTMDNER	56.601	3e-05	201050	APIS MELLIFERA	vitellogenin
[19]		58585104	9	6.3	4.03	1.1e-07	1370.31	685.66	2	685.893	-0.23	DLPISGKPFQIR	55.32	0.00042	201050	APIS MELLIFERA	vitellogenin
[19]		58585104	9	6.3	4.03	1.1e-07	1211.57	606.29	2	606.339	-0.049	SPELVPMPTLK	57.182	0.001	201050	APIS MELLIFERA	vitellogenin
[19]		58585104	9	6.3	4.03	1.1e-07	1777.2	593.07	3	592.946	0.12	VMTRPDTDSENWTPK	46.903	0.0026	201050	APIS MELLIFERA	vitellogenin
[20]		110757658	9	17.4	4.12	6.1e-07	1420.33	710.67	2	710.369	0.3	AMLEDPSFLIAGR	61.348	6.1e-07	64668.5	APIS MELLIFERA	PREDICTED: similar to Pyruvate dehydrogenase protein X component, mitochondrial precursor (Dihydrolipoamide dehydrogenase-binding protein of pyruvate dehydrogenase complex) (Lipoyl-containing pyruvate dehydrogenase complex component X) (E3-binding protein) (E...
[20]		110757658	9	17.4	4.12	6.1e-07	1619.41	810.21	2	809.92	0.29	AIDEDQAADFLAVLK	66.769	4e-06	64668.5	APIS MELLIFERA	PREDICTED: similar to Pyruvate dehydrogenase protein X component, mitochondrial precursor (Dihydrolipoamide dehydrogenase-binding protein of pyruvate dehydrogenase complex) (Lipoyl-containing pyruvate dehydrogenase complex component X) (E3-binding protein) (E...
[20]		110757658	9	17.4	4.12	6.1e-07	1185.49	593.25	2	592.848	0.4	IIVGEGIQDIK	52.124	2.4e-05	64668.5	APIS MELLIFERA	PREDICTED: similar to Pyruvate dehydrogenase protein X component, mitochondrial precursor (Dihydrolipoamide dehydrogenase-binding protein of pyruvate dehydrogenase complex) (Lipoyl-containing pyruvate dehydrogenase complex component X) (E3-binding protein) (E...
[20]		110757658	9	17.4	4.12	6.1e-07	1168.07	584.54	2	584.316	0.22	SDVLTYIQTK	52.8	0.00014	64668.5	APIS MELLIFERA	PREDICTED: similar to Pyruvate dehydrogenase protein X component, mitochondrial precursor (Dihydrolipoamide dehydrogenase-binding protein of pyruvate dehydrogenase complex) (Lipoyl-containing pyruvate dehydrogenase complex component X) (E3-binding protein) (E...
[20]		110757658	9	17.4	4.12	6.1e-07	1434.11	717.56	2	717.373	0.19	SILMPSLSPTMEK	58.359	0.0003	64668.5	APIS MELLIFERA	PREDICTED: similar to Pyruvate dehydrogenase protein X component, mitochondrial precursor (Dihydrolipoamide dehydrogenase-binding protein of pyruvate dehydrogenase complex) (Lipoyl-containing pyruvate dehydrogenase complex component X) (E3-binding protein) (E...
[20]		110757658	9	17.4	4.12	6.1e-07	1694.51	847.76	2	847.502	0.26	AIINLPQTAILAVGSGR	66.026	0.0009	64668.5	APIS MELLIFERA	PREDICTED: similar to Pyruvate dehydrogenase protein X component, mitochondrial precursor (Dihydrolipoamide dehydrogenase-binding protein of pyruvate dehydrogenase complex) (Lipoyl-containing pyruvate dehydrogenase complex component X) (E3-binding protein) (E...
[20]		110757658	9	17.4	4.12	6.1e-07	1131.47	566.24	2	565.785	0.46	NDQIIQM(Oxidation)PR	42.095	0.0028	64668.5	APIS MELLIFERA	PREDICTED: similar to Pyruvate dehydrogenase protein X component, mitochondrial precursor (Dihydrolipoamide dehydrogenase-binding protein of pyruvate dehydrogenase complex) (Lipoyl-containing pyruvate dehydrogenase complex component X) (E3-binding protein) (E...
[20]		110757658	9	17.4	4.12	6.1e-07	2621.52	874.51	3	873.817	0.69	HFRAIINLPQTAILAVGSGREELN	38.104	0.012	64668.5	APIS MELLIFERA	PREDICTED: similar to Pyruvate dehydrogenase protein X component, mitochondrial precursor (Dihydrolipoamide dehydrogenase-binding protein of pyruvate dehydrogenase complex) (Lipoyl-containing pyruvate dehydrogenase complex component X) (E3-binding protein) (E...
[20]		110757658	9	17.4	4.12	6.1e-07	1120.79	560.9	2	560.822	0.078	RLLEEYGLK	48.842	0.019	64668.5	APIS MELLIFERA	PREDICTED: similar to Pyruvate dehydrogenase protein X component, mitochondrial precursor (Dihydrolipoamide dehydrogenase-binding protein of pyruvate dehydrogenase complex) (Lipoyl-containing pyruvate dehydrogenase complex component X) (E3-binding protein) (E...
[21]		58585254	5	37.3	6.73	3.7e-10	1973.35	987.18	2	986.917	0.26	FMEEDTDTEAMQQELR	54.004	3.7e-10	17171.3	APIS MELLIFERA	troponin C type IIIb
[21]		58585254	5	37.3	6.73	3.7e-10	1873.23	937.12	2	936.959	0.16	GTITTDTVGTILSMMGM(Oxidation)K	73.274	6.6e-09	17171.3	APIS MELLIFERA	troponin C type IIIb
[21]		58585254	5	37.3	6.73	3.7e-10	1858.15	929.58	2	928.962	0.62	GTITTDTVGTILSMMGMK	79.105	6.2e-07	17171.3	APIS MELLIFERA	troponin C type IIIb
[21]		58585254	5	37.3	6.73	3.7e-10	1285.19	643.1	2	642.8	0.3	MGFEAFDPDKK	51.148	7e-07	17171.3	APIS MELLIFERA	troponin C type IIIb
[21]		58585254	5	37.3	6.73	3.7e-10	1372.43	686.72	2	686.331	0.39	EGNGYITTDVFR	54.901	0.0042	17171.3	APIS MELLIFERA	troponin C type IIIb
[22]		110765081	9	24.9	3.97	1.6e-07	1469.35	735.18	2	734.424	0.76	ILNANLITPEEIK	57.751	1.6e-07	44573.9	APIS MELLIFERA	PREDICTED: similar to lethal (1) G0334 CG7010-PC, isoform C isoform 1
[22]		110765081	9	24.9	3.97	1.6e-07	1384.35	692.68	2	692.349	0.33	ATEASFETKPFR	46.683	7.3e-07	44573.9	APIS MELLIFERA	PREDICTED: similar to lethal (1) G0334 CG7010-PC, isoform C isoform 1
[22]		110765081	9	24.9	3.97	1.6e-07	1254.25	627.63	2	627.319	0.31	RMETAAGNLYK	42.585	7.7e-06	44573.9	APIS MELLIFERA	PREDICTED: similar to lethal (1) G0334 CG7010-PC, isoform C isoform 1
[22]		110765081	9	24.9	3.97	1.6e-07	1430.45	715.73	2	715.898	-0.17	GIEPFGVLAELTGK	72.006	8.1e-06	44573.9	APIS MELLIFERA	PREDICTED: similar to lethal (1) G0334 CG7010-PC, isoform C isoform 1
[22]		110765081	9	24.9	3.97	1.6e-07	1113.97	557.49	2	557.266	0.22	M(Oxidation)ETAAGNLYK	39.221	1.3e-05	44573.9	APIS MELLIFERA	PREDICTED: similar to lethal (1) G0334 CG7010-PC, isoform C isoform 1
[22]		110765081	9	24.9	3.97	1.6e-07	1313.65	657.33	2	656.83	0.5	TEASFETKPFR	46.481	0.00022	44573.9	APIS MELLIFERA	PREDICTED: similar to lethal (1) G0334 CG7010-PC, isoform C isoform 1
[22]		110765081	9	24.9	3.97	1.6e-07	1109.05	555.03	2	554.798	0.23	DEAIELYKK	44.524	0.0004	44573.9	APIS MELLIFERA	PREDICTED: similar to lethal (1) G0334 CG7010-PC, isoform C isoform 1
[22]		110765081	9	24.9	3.97	1.6e-07	1406.47	703.74	2	703.881	-0.14	NITPFNPLPHTR	52.421	0.0035	44573.9	APIS MELLIFERA	PREDICTED: similar to lethal (1) G0334 CG7010-PC, isoform C isoform 1
[22]		110765081	9	24.9	3.97	1.6e-07	3195.9	799.73	4	800.128	-0.4	FAIDYCTSGKGPIVLETVTYRYSGHSMSD	63.401	0.05	44573.9	APIS MELLIFERA	PREDICTED: similar to lethal (1) G0334 CG7010-PC, isoform C isoform 1
[23]		66530423	8	20	4.17	7.3e-08	1749.25	875.13	2	874.904	0.23	TFVEDSIYDEFVER	63.584	7.3e-08	55686	APIS MELLIFERA	PREDICTED: similar to Aldehyde dehydrogenase CG3752-PA isoform 1
[23]		66530423	8	20	4.17	7.3e-08	1430.47	715.74	2	715.395	0.34	GVLLNNLASLMER	68.646	7.6e-08	55686	APIS MELLIFERA	PREDICTED: similar to Aldehyde dehydrogenase CG3752-PA isoform 1
[23]		66530423	8	20	4.17	7.3e-08	1189.65	595.33	2	595.294	0.036	NEGAELVSGGTR	40.745	4.3e-07	55686	APIS MELLIFERA	PREDICTED: similar to Aldehyde dehydrogenase CG3752-PA isoform 1
[23]		66530423	8	20	4.17	7.3e-08	1308.69	654.85	2	654.867	-0.017	TGAALVAHNLVDK	47.327	4.3e-07	55686	APIS MELLIFERA	PREDICTED: similar to Aldehyde dehydrogenase CG3752-PA isoform 1
[23]		66530423	8	20	4.17	7.3e-08	1401.29	701.15	2	700.893	0.26	EEIFGPVQQILK	64.049	7.5e-06	55686	APIS MELLIFERA	PREDICTED: similar to Aldehyde dehydrogenase CG3752-PA isoform 1
[23]		66530423	8	20	4.17	7.3e-08	1413.05	707.03	2	706.882	0.15	GYFVAPTVFANVK	61.465	5.2e-05	55686	APIS MELLIFERA	PREDICTED: similar to Aldehyde dehydrogenase CG3752-PA isoform 1
[23]		66530423	8	20	4.17	7.3e-08	1177.43	589.22	2	589.32	-0.1	NHGQVIPIDGK	42.074	0.0058	55686	APIS MELLIFERA	PREDICTED: similar to Aldehyde dehydrogenase CG3752-PA isoform 1
[23]		66530423	8	20	4.17	7.3e-08	1600.37	800.69	2	800.399	0.29	ELGQYGLEAYTEVK	55.981	0.016	55686	APIS MELLIFERA	PREDICTED: similar to Aldehyde dehydrogenase CG3752-PA isoform 1
[24]		110749675	7	22.8	5.09	7.2e-09	1377.05	689.03	2	688.818	0.21	LAEASQAADESER	33.062	7.2e-09	32982.3	APIS MELLIFERA	PREDICTED: similar to Tropomyosin 1 CG4898-PD, isoform D
[24]		110749675	7	22.8	5.09	7.2e-09	1486.35	743.68	2	743.386	0.29	ALQNAESEVAALNR	51.421	9.9e-09	32982.3	APIS MELLIFERA	PREDICTED: similar to Tropomyosin 1 CG4898-PD, isoform D
[24]		110749675	7	22.8	5.09	7.2e-09	1414.35	707.68	2	707.388	0.29	RIQLLEEDLER	53.316	1.1e-05	32982.3	APIS MELLIFERA	PREDICTED: similar to Tropomyosin 1 CG4898-PD, isoform D
[24]		110749675	7	22.8	5.09	7.2e-09	1258.19	629.6	2	629.338	0.26	IQLLEEDLER	55.215	2.9e-05	32982.3	APIS MELLIFERA	PREDICTED: similar to Tropomyosin 1 CG4898-PD, isoform D
[24]		110749675	7	22.8	5.09	7.2e-09	1130.11	565.56	2	565.309	0.25	IVELEEELR	52.347	0.00014	32982.3	APIS MELLIFERA	PREDICTED: similar to Tropomyosin 1 CG4898-PD, isoform D
[24]		110749675	7	22.8	5.09	7.2e-09	2229.03	743.68	3	743.389	0.29	LEEKDKALQNAESEVAALNR	51.421	0.0015	32982.3	APIS MELLIFERA	PREDICTED: similar to Tropomyosin 1 CG4898-PD, isoform D
[24]		110749675	7	22.8	5.09	7.2e-09	1328.27	664.64	2	664.383	0.26	VSLLEQQLAQAK	53.5	0.015	32982.3	APIS MELLIFERA	PREDICTED: similar to Tropomyosin 1 CG4898-PD, isoform D
[25]		94158718	6	48.9	5.87	6.8e-10	1816.41	908.71	2	908.418	0.29	FNAYDDGGNFNEVVVR	54.782	6.8e-10	15203.8	APIS MELLIFERA	odorant binding protein 21
[25]		94158718	6	48.9	5.87	6.8e-10	1679.73	840.37	2	839.912	0.46	EIAEIYLDENEVNK	54.206	2.4e-08	15203.8	APIS MELLIFERA	odorant binding protein 21
[25]		94158718	6	48.9	5.87	6.8e-10	1944.33	648.78	3	648.646	0.13	KFNAYDDGGNFNEVVVR	52.726	4.3e-06	15203.8	APIS MELLIFERA	odorant binding protein 21
[25]		94158718	6	48.9	5.87	6.8e-10	1285.31	643.16	2	642.88	0.28	LTLEELQIGLR	62.957	1.4e-05	15203.8	APIS MELLIFERA	odorant binding protein 21
[25]		94158718	6	48.9	5.87	6.8e-10	1130.51	565.76	2	565.788	-0.028	NGIIDVENEK	46.173	0.00041	15203.8	APIS MELLIFERA	odorant binding protein 21
[25]		94158718	6	48.9	5.87	6.8e-10	1666.95	556.32	3	556.269	0.051	IDSGIDEKKEDDFR	43.96	0.045	15203.8	APIS MELLIFERA	odorant binding protein 21
[26]		167683072	7	24	4.05	6e-08	1412.25	706.63	2	706.381	0.25	LPDGQVITIGNER	51.467	6e-08	31131	ULOBORUS DIVERSUS	actin
[26]		167683072	7	24	4.05	6e-08	1704.45	852.73	2	852.434	0.3	YELPDGQVITIGNER	59.119	1.9e-07	31131	ULOBORUS DIVERSUS	actin
[26]		167683072	7	24	4.05	6e-08	1791.95	896.48	2	895.95	0.53	SYELPDGQVITIGNER	60.101	2.1e-07	31131	ULOBORUS DIVERSUS	actin
[26]		167683072	7	24	4.05	6e-08	1856.1	619.37	3	619.004	0.37	APEEHPVLLTEAPLNPK	53.23	1.6e-06	31131	ULOBORUS DIVERSUS	actin
[26]		167683072	7	24	4.05	6e-08	2117.45	1059.23	2	1059.02	0.21	TTGIVLDSGDGVSHTVPIYEG	58.264	4.1e-06	31131	ULOBORUS DIVERSUS	actin
[26]		167683072	7	24	4.05	6e-08	1326.27	663.64	2	663.311	0.33	SGGTTMYPGIADR	47.013	4.1e-06	31131	ULOBORUS DIVERSUS	actin
[26]		167683072	7	24	4.05	6e-08	1202.09	601.55	2	601.312	0.24	DGQVITIGNER	46.22	0.0071	31131	ULOBORUS DIVERSUS	actin
[27]		66534286	5	7.5	5.38	1.1e-08	1450.33	725.67	2	724.896	0.77	IVSQLLTLMDGMK	69.137	1.1e-08	88896.3	APIS MELLIFERA	PREDICTED: similar to TER94 CG2331-PA, isoform A isoform 1
[27]		66534286	5	7.5	5.38	1.1e-08	1827.67	914.34	2	913.999	0.34	NSPAIIFIDELDAIAPK	78.221	5.6e-08	88896.3	APIS MELLIFERA	PREDICTED: similar to TER94 CG2331-PA, isoform A isoform 1
[27]		66534286	5	7.5	5.38	1.1e-08	1257.11	629.06	2	628.828	0.23	EIDIGIPDATGR	53.937	3.2e-05	88896.3	APIS MELLIFERA	PREDICTED: similar to TER94 CG2331-PA, isoform A isoform 1
[27]		66534286	5	7.5	5.38	1.1e-08	1346.33	673.67	2	673.341	0.33	TWDDIGGLQNVK	54.798	0.0017	88896.3	APIS MELLIFERA	PREDICTED: similar to TER94 CG2331-PA, isoform A isoform 1
[27]		66534286	5	7.5	5.38	1.1e-08	2173.41	725.14	3	725.726	-0.59	GEVERRIVSQLLTLMDGMK	69.269	0.024	88896.3	APIS MELLIFERA	PREDICTED: similar to TER94 CG2331-PA, isoform A isoform 1
[28]		110750766	7	28.1	4.27	1.3e-07	1414.21	707.61	2	706.909	0.7	NITIEQTGKPALK	46.308	1.3e-07	23002.2	APIS MELLIFERA	PREDICTED: similar to Protein lethal(2)essential for life (Protein Efl21)
[28]		110750766	7	28.1	4.27	1.3e-07	1128.21	564.61	2	564.265	0.34	QDEHGWISR	38.48	0.00024	23002.2	APIS MELLIFERA	PREDICTED: similar to Protein lethal(2)essential for life (Protein Efl21)
[28]		110750766	7	28.1	4.27	1.3e-07	2013.84	671.95	3	671.705	0.24	QVILDVQQFKPDEINVK	60.222	0.00075	23002.2	APIS MELLIFERA	PREDICTED: similar to Protein lethal(2)essential for life (Protein Efl21)
[28]		110750766	7	28.1	4.27	1.3e-07	1111.05	556.03	2	555.752	0.28	Q(Gln->pyro-Glu)DEHGWISR	45.475	0.00087	23002.2	APIS MELLIFERA	PREDICTED: similar to Protein lethal(2)essential for life (Protein Efl21)
[28]		110750766	7	28.1	4.27	1.3e-07	1791.15	597.72	3	597.33	0.39	NPLIYYRPWGELLR	66.122	0.002	23002.2	APIS MELLIFERA	PREDICTED: similar to Protein lethal(2)essential for life (Protein Efl21)
[28]		110750766	7	28.1	4.27	1.3e-07	1172.03	586.52	2	586.319	0.2	NITIEQTGKPA	43.755	0.0022	23002.2	APIS MELLIFERA	PREDICTED: similar to Protein lethal(2)essential for life (Protein Efl21)
[28]		110750766	7	28.1	4.27	1.3e-07	2058.72	686.91	3	687.058	-0.15	LRNPLIYYRPWGELLR	76.066	0.011	23002.2	APIS MELLIFERA	PREDICTED: similar to Protein lethal(2)essential for life (Protein Efl21)
[29]		48142692	6	23.4	4.1	3.7e-08	1534.43	767.72	2	767.441	0.28	VPVHNVSVVDLTVR	52.872	3.7e-08	35883.5	APIS MELLIFERA	PREDICTED: similar to Glyceraldehyde-3-phosphate dehydrogenase 2 (Glyceraldehyde-3-phosphate dehydrogenase II) (GAPDH II) isoform 1
[29]		48142692	6	23.4	4.1	3.7e-08	1689.47	845.24	2	844.923	0.32	AGAEYIVESTGVYTTK	52.783	6.2e-08	35883.5	APIS MELLIFERA	PREDICTED: similar to Glyceraldehyde-3-phosphate dehydrogenase 2 (Glyceraldehyde-3-phosphate dehydrogenase II) (GAPDH II) isoform 1
[29]		48142692	6	23.4	4.1	3.7e-08	1343.27	672.14	2	671.852	0.29	IENDQLVVNGNK	43.737	2.2e-07	35883.5	APIS MELLIFERA	PREDICTED: similar to Glyceraldehyde-3-phosphate dehydrogenase 2 (Glyceraldehyde-3-phosphate dehydrogenase II) (GAPDH II) isoform 1
[29]		48142692	6	23.4	4.1	3.7e-08	2654.61	885.54	3	885.127	0.41	VIHDNFEIVEGLMTTVHAVTATQK	76.821	6.2e-07	35883.5	APIS MELLIFERA	PREDICTED: similar to Glyceraldehyde-3-phosphate dehydrogenase 2 (Glyceraldehyde-3-phosphate dehydrogenase II) (GAPDH II) isoform 1
[29]		48142692	6	23.4	4.1	3.7e-08	1161.31	581.16	2	580.825	0.34	AGIALNNNFVK	51.765	2e-05	35883.5	APIS MELLIFERA	PREDICTED: similar to Glyceraldehyde-3-phosphate dehydrogenase 2 (Glyceraldehyde-3-phosphate dehydrogenase II) (GAPDH II) isoform 1
[29]		48142692	6	23.4	4.1	3.7e-08	1817.28	606.43	3	606.316	0.11	KAGAEYIVESTGVYTTK	67.359	0.012	35883.5	APIS MELLIFERA	PREDICTED: similar to Glyceraldehyde-3-phosphate dehydrogenase 2 (Glyceraldehyde-3-phosphate dehydrogenase II) (GAPDH II) isoform 1
[30]		58531215	5	14.7	4.21	7.1e-07	1219.97	610.49	2	610.338	0.15	DFLAGGVAAAISK	58.247	7.1e-07	32986.7	APIS MELLIFERA	ADP/ATP translocase
[30]		58531215	5	14.7	4.21	7.1e-07	1447.39	724.2	2	723.874	0.33	YFPTQALNFAFK	65.727	1.6e-06	32986.7	APIS MELLIFERA	ADP/ATP translocase
[30]		58531215	5	14.7	4.21	7.1e-07	1284.25	642.63	2	642.343	0.29	FPTQALNFAFK	62.161	1.7e-06	32986.7	APIS MELLIFERA	ADP/ATP translocase
[30]		58531215	5	14.7	4.21	7.1e-07	1178.65	589.83	2	589.866	-0.036	LLLQVQHISK	49.309	5.4e-06	32986.7	APIS MELLIFERA	ADP/ATP translocase
[30]		58531215	5	14.7	4.21	7.1e-07	1186.21	593.61	2	593.288	0.32	EQGFLSYWR	59.496	0.00026	32986.7	APIS MELLIFERA	ADP/ATP translocase
[31]		229892214	6	9.6	4.2	1.4e-07	1491.47	746.24	2	745.9	0.34	VFAPEEISAMVLGK	67.95	1.4e-07	72866.4	APIS MELLIFERA	heat shock protein cognate 3
[31]		229892214	6	9.6	4.2	1.4e-07	1316.97	658.99	2	658.822	0.17	NELESYAYSLK	54.34	1.8e-06	72866.4	APIS MELLIFERA	heat shock protein cognate 3
[31]		229892214	6	9.6	4.2	1.4e-07	1241.15	621.08	2	620.816	0.26	MKETAEAYLGK	44.555	2.1e-05	72866.4	APIS MELLIFERA	heat shock protein cognate 3
[31]		229892214	6	9.6	4.2	1.4e-07	1340.35	670.68	2	670.395	0.28	ELTDIVQPIIAK	58.217	4.4e-05	72866.4	APIS MELLIFERA	heat shock protein cognate 3
[31]		229892214	6	9.6	4.2	1.4e-07	1257.29	629.15	2	628.813	0.34	M(Oxidation)KETAEAYLGK	41.524	0.016	72866.4	APIS MELLIFERA	heat shock protein cognate 3
[31]		229892214	6	9.6	4.2	1.4e-07	1868.04	623.35	3	622.951	0.4	WLEENADTDPEEYKK	48.095	0.041	72866.4	APIS MELLIFERA	heat shock protein cognate 3
[32]		110768510	7	27.4	3.46	5.2e-07	1280.25	640.63	2	640.348	0.28	YKDSENLVIAK	44.298	5.2e-07	24339.6	APIS MELLIFERA	PREDICTED: similar to Protein disulfide-isomerase precursor (PDI), partial
[32]		110768510	7	27.4	3.46	5.2e-07	1411.01	706.01	2	705.81	0.2	ETNEAVEYNGER	38.545	8.2e-07	24339.6	APIS MELLIFERA	PREDICTED: similar to Protein disulfide-isomerase precursor (PDI), partial
[32]		110768510	7	27.4	3.46	5.2e-07	1332.41	666.71	2	666.364	0.35	QLAPIYEALGEK	57.283	2.8e-05	24339.6	APIS MELLIFERA	PREDICTED: similar to Protein disulfide-isomerase precursor (PDI), partial
[32]		110768510	7	27.4	3.46	5.2e-07	1204.09	602.55	2	602.314	0.24	DATANELKDVK	42.125	0.00014	24339.6	APIS MELLIFERA	PREDICTED: similar to Protein disulfide-isomerase precursor (PDI), partial
[32]		110768510	7	27.4	3.46	5.2e-07	1272.21	636.61	2	636.348	0.26	VSSYPTITLYK	53.675	0.00024	24339.6	APIS MELLIFERA	PREDICTED: similar to Protein disulfide-isomerase precursor (PDI), partial
[32]		110768510	7	27.4	3.46	5.2e-07	1336.07	668.54	2	667.835	0.71	MDATANELKDVK	44.994	0.0015	24339.6	APIS MELLIFERA	PREDICTED: similar to Protein disulfide-isomerase precursor (PDI), partial
[32]		110768510	7	27.4	3.46	5.2e-07	1117.33	559.17	2	558.817	0.35	KDSENLVIAK	36.755	0.013	24339.6	APIS MELLIFERA	PREDICTED: similar to Protein disulfide-isomerase precursor (PDI), partial
[33]		66548684	6	15.9	4.38	2.3e-08	1689.27	845.14	2	844.923	0.22	GTSSIVYVDYENITK	57.009	2.3e-08	55815.1	APIS MELLIFERA	PREDICTED: similar to Pyruvate kinase CG7070-PB, isoform B
[33]		66548684	6	15.9	4.38	2.3e-08	1355.59	678.3	2	677.901	0.4	AGLSIPVGIALDTK	62.179	6.3e-07	55815.1	APIS MELLIFERA	PREDICTED: similar to Pyruvate kinase CG7070-PB, isoform B
[33]		66548684	6	15.9	4.38	2.3e-08	1205.53	603.27	2	603.342	-0.072	VFVDDGLISLK	59.577	0.00011	55815.1	APIS MELLIFERA	PREDICTED: similar to Pyruvate kinase CG7070-PB, isoform B
[33]		66548684	6	15.9	4.38	2.3e-08	1187.65	594.33	2	594.317	0.013	EGGGAAEVELKK	27.505	0.0018	55815.1	APIS MELLIFERA	PREDICTED: similar to Pyruvate kinase CG7070-PB, isoform B
[33]		66548684	6	15.9	4.38	2.3e-08	1122.29	561.65	2	561.276	0.37	MIDTGMNIAR	48.619	0.0024	55815.1	APIS MELLIFERA	PREDICTED: similar to Pyruvate kinase CG7070-PB, isoform B
[33]		66548684	6	15.9	4.38	2.3e-08	2064.06	688.69	3	688.716	-0.026	KGVNLPGTPVDLPAVSEKDK	36.493	0.037	55815.1	APIS MELLIFERA	PREDICTED: similar to Pyruvate kinase CG7070-PB, isoform B
[34]		110765226	4	33.3	4.7	2.4e-08	1338.11	669.56	2	669.395	0.16	YVAAYLLAVLGGK	71.287	2.4e-08	11999.7	APIS MELLIFERA	PREDICTED: similar to 60S acidic ribosomal protein P2 (Acidic ribosomal protein RPA1)
[34]		110765226	4	33.3	4.7	2.4e-08	1347.83	674.42	2	674.354	0.066	ILSSVGIETDGEK	48.111	6.4e-08	11999.7	APIS MELLIFERA	PREDICTED: similar to 60S acidic ribosomal protein P2 (Acidic ribosomal protein RPA1)
[34]		110765226	4	33.3	4.7	2.4e-08	1364.25	682.63	2	682.342	0.29	SIEELISQGMEK	58.921	2.9e-07	11999.7	APIS MELLIFERA	PREDICTED: similar to 60S acidic ribosomal protein P2 (Acidic ribosomal protein RPA1)
[34]		110765226	4	33.3	4.7	2.4e-08	1175.53	588.27	2	587.863	0.41	VAAYLLAVLGGK	65.171	2.6e-06	11999.7	APIS MELLIFERA	PREDICTED: similar to 60S acidic ribosomal protein P2 (Acidic ribosomal protein RPA1)
[35]		283436154	4	10.3	5.12	1.2e-09	1824.41	912.71	2	911.918	0.79	HPSDLPIWTFDGSSTY	64.175	1.2e-09	41263.9	APIS MELLIFERA	glutamine synthetase
[35]		283436154	4	10.3	5.12	1.2e-09	1409.61	705.31	2	705.357	-0.047	YIWIDGTGESLR	56.959	8e-08	41263.9	APIS MELLIFERA	glutamine synthetase
[35]		283436154	4	10.3	5.12	1.2e-09	1660.21	830.61	2	830.386	0.22	HPSDLPIWTFDGSST	61.857	6e-07	41263.9	APIS MELLIFERA	glutamine synthetase
[35]		283436154	4	10.3	5.12	1.2e-09	1217.91	609.46	2	608.814	0.65	YLDLPQPENK	50.12	5.4e-05	41263.9	APIS MELLIFERA	glutamine synthetase
[36]		5627	5	18.5	4.51	3.9e-08	1388.49	694.75	2	694.838	-0.088	NSADTISSYFVGK	55.201	3.9e-08	18487.1	APIS MELLIFERA	phospholipase A-2
[36]		5627	5	18.5	4.51	3.9e-08	1145.17	573.09	2	572.789	0.3	MYFNLIDTK	59.019	5.1e-06	18487.1	APIS MELLIFERA	phospholipase A-2
[36]		5627	5	18.5	4.51	3.9e-08	1160.57	580.79	2	580.786	0.0036	M(Oxidation)YFNLIDTK	55.012	6e-05	18487.1	APIS MELLIFERA	phospholipase A-2
[36]		5627	5	18.5	4.51	3.9e-08	1126.57	563.79	2	563.788	0.0024	VYQWFDLR	60.287	0.00018	18487.1	APIS MELLIFERA	phospholipase A-2
[36]		5627	5	18.5	4.51	3.9e-08	1158.31	579.66	2	579.783	-0.12	VYQW(Dioxidation)FDLR	56.662	0.031	18487.1	APIS MELLIFERA	phospholipase A-2
[37]		66515272	5	9.7	4.3	1.6e-08	1693.51	847.26	2	846.902	0.36	DSMYNILYQLSSMK	72.455	1.6e-08	68373.5	APIS MELLIFERA	PREDICTED: similar to Vacuolar ATP synthase catalytic subunit A, osteoclast isoform (V-ATPase subunit A 2) (Vacuolar proton pump alpha subunit 2) (V-ATPase 69 kDa subunit 2) (Isoform HO68) isoform 1
[37]		66515272	5	9.7	4.3	1.6e-08	1378.47	689.74	2	689.343	0.4	TAAWEFNPSNIK	56.145	3.3e-06	68373.5	APIS MELLIFERA	PREDICTED: similar to Vacuolar ATP synthase catalytic subunit A, osteoclast isoform (V-ATPase subunit A 2) (Vacuolar proton pump alpha subunit 2) (V-ATPase 69 kDa subunit 2) (Isoform HO68) isoform 1
[37]		66515272	5	9.7	4.3	1.6e-08	1410.59	705.8	2	705.885	-0.085	VGYYELVGEIIR	66.426	1e-05	68373.5	APIS MELLIFERA	PREDICTED: similar to Vacuolar ATP synthase catalytic subunit A, osteoclast isoform (V-ATPase subunit A 2) (Vacuolar proton pump alpha subunit 2) (V-ATPase 69 kDa subunit 2) (Isoform HO68) isoform 1
[37]		66515272	5	9.7	4.3	1.6e-08	1520.31	760.66	2	760.404	0.26	DINELTNSIYIPK	60.424	6.8e-05	68373.5	APIS MELLIFERA	PREDICTED: similar to Vacuolar ATP synthase catalytic subunit A, osteoclast isoform (V-ATPase subunit A 2) (Vacuolar proton pump alpha subunit 2) (V-ATPase 69 kDa subunit 2) (Isoform HO68) isoform 1
[37]		66515272	5	9.7	4.3	1.6e-08	1130.31	565.66	2	565.313	0.35	TMLQVWPVR	58.502	0.00036	68373.5	APIS MELLIFERA	PREDICTED: similar to Vacuolar ATP synthase catalytic subunit A, osteoclast isoform (V-ATPase subunit A 2) (Vacuolar proton pump alpha subunit 2) (V-ATPase 69 kDa subunit 2) (Isoform HO68) isoform 1
[38]		66534655	5	24.8	4.07	2.5e-07	1593.31	797.16	2	796.883	0.28	LAAFHYEENEEIK	49.39	2.5e-07	17700.3	APIS MELLIFERA	PREDICTED: similar to Glutathione S transferase S1 CG8938-PA, isoform A, partial
[38]		66534655	5	24.8	4.07	2.5e-07	1595.53	798.27	2	797.927	0.34	KIADEVVPYYLER	54.855	6e-07	17700.3	APIS MELLIFERA	PREDICTED: similar to Glutathione S transferase S1 CG8938-PA, isoform A, partial
[38]		66534655	5	24.8	4.07	2.5e-07	1466.47	733.74	2	733.88	-0.14	IADEVVPYYLER	56.354	1.6e-06	17700.3	APIS MELLIFERA	PREDICTED: similar to Glutathione S transferase S1 CG8938-PA, isoform A, partial
[38]		66534655	5	24.8	4.07	2.5e-07	1275.05	638.03	2	637.343	0.69	FGQVPVLDVDGK	60.146	0.0051	17700.3	APIS MELLIFERA	PREDICTED: similar to Glutathione S transferase S1 CG8938-PA, isoform A, partial
[38]		66534655	5	24.8	4.07	2.5e-07	1255.35	628.18	2	627.856	0.32	GQVPVLDVDGKK	46.65	0.049	17700.3	APIS MELLIFERA	PREDICTED: similar to Glutathione S transferase S1 CG8938-PA, isoform A, partial
[39]		112983481	4	15.1	5.01	1.2e-08	1458.45	729.73	2	729.438	0.29	LIGQIVSSITASLR	70.663	1.2e-08	49905.9	BOMBYX MORI	tubulin alpha chain
[39]		112983481	4	15.1	5.01	1.2e-08	1825.39	913.2	2	912.996	0.2	VGINYQPPTVVPGGDLAK	56.555	4.1e-05	49905.9	BOMBYX MORI	tubulin alpha chain
[39]		112983481	4	15.1	5.01	1.2e-08	1272.07	636.54	2	636.327	0.21	DLEPTVVDEVR	51.579	0.00039	49905.9	BOMBYX MORI	tubulin alpha chain
[39]		112983481	4	15.1	5.01	1.2e-08	2931.58	733.65	4	733.332	0.32	RAFVHW(Oxidation)YVGEGMEEGEFSEAREDLA	69.608	0.041	49905.9	BOMBYX MORI	tubulin alpha chain
[40]		110766532	6	22.9	3.62	2.7e-07	1678.45	839.73	2	839.468	0.26	AILALMTPLPEFYAK	70.505	2.7e-07	36004.8	APIS MELLIFERA	PREDICTED: similar to Annexin IX CG5730-PC, isoform C isoform 1
[40]		110766532	6	22.9	3.62	2.7e-07	1154.19	577.6	2	577.314	0.29	LAGHSLEDAIK	46.465	0.0081	36004.8	APIS MELLIFERA	PREDICTED: similar to Annexin IX CG5730-PC, isoform C isoform 1
[40]		110766532	6	22.9	3.62	2.7e-07	1146.97	573.99	2	574.301	-0.31	GLGTDDSTLIR	48.164	0.0093	36004.8	APIS MELLIFERA	PREDICTED: similar to Annexin IX CG5730-PC, isoform C isoform 1
[40]		110766532	6	22.9	3.62	2.7e-07	1772.61	591.54	3	591.304	0.24	GFGTDEQTIIDVLAHR	66.008	0.034	36004.8	APIS MELLIFERA	PREDICTED: similar to Annexin IX CG5730-PC, isoform C isoform 1
[40]		110766532	6	22.9	3.62	2.7e-07	1114.13	557.57	2	557.282	0.29	KIFEEYER	43.493	0.039	36004.8	APIS MELLIFERA	PREDICTED: similar to Annexin IX CG5730-PC, isoform C isoform 1
[40]		110766532	6	22.9	3.62	2.7e-07	1503.25	752.13	2	751.86	0.27	DPFDPEQDASLLR	62.2	0.046	36004.8	APIS MELLIFERA	PREDICTED: similar to Annexin IX CG5730-PC, isoform C isoform 1
[41]		66531851	4	18.3	3.65	3.5e-07	1257.23	629.12	2	628.793	0.33	VFNEYGVEDGK	45.822	3.5e-07	30048.7	APIS MELLIFERA	PREDICTED: similar to Protein disulfide-isomerase precursor (PDI), partial
[41]		66531851	4	18.3	3.65	3.5e-07	1704.15	852.58	2	851.954	0.63	SLPLVVDFNQDTVQK	60.75	1.4e-06	30048.7	APIS MELLIFERA	PREDICTED: similar to Protein disulfide-isomerase precursor (PDI), partial
[41]		66531851	4	18.3	3.65	3.5e-07	1301.33	651.17	2	650.848	0.32	QADDIVNWVIK	61.838	2.8e-05	30048.7	APIS MELLIFERA	PREDICTED: similar to Protein disulfide-isomerase precursor (PDI), partial
[41]		66531851	4	18.3	3.65	3.5e-07	1332.29	666.65	2	665.859	0.79	VDAIIETELAEK	53.458	0.04	30048.7	APIS MELLIFERA	PREDICTED: similar to Protein disulfide-isomerase precursor (PDI), partial
[42]		110748949	4	17	4.1	6e-08	1347.39	674.2	2	673.862	0.34	GILAADESTATIGK	49.338	6e-08	39600.6	APIS MELLIFERA	PREDICTED: similar to Aldolase CG6058-PF, isoform F
[42]		110748949	4	17	4.1	6e-08	1305.37	653.19	2	652.84	0.35	ADDGTPFVELLK	61.483	2.6e-05	39600.6	APIS MELLIFERA	PREDICTED: similar to Aldolase CG6058-PF, isoform F
[42]		110748949	4	17	4.1	6e-08	1113.19	557.1	2	556.327	0.77	SIAQQIVAPGK	48.709	0.012	39600.6	APIS MELLIFERA	PREDICTED: similar to Aldolase CG6058-PF, isoform F
[42]		110748949	4	17	4.1	6e-08	2407.83	803.28	3	803.417	-0.14	ALGKYSGGVVGAAGNATLFVANHAY	28.203	0.037	39600.6	APIS MELLIFERA	PREDICTED: similar to Aldolase CG6058-PF, isoform F
[43]		66521433	3	4.6	4.74	8.3e-08	1590.25	795.63	2	794.943	0.69	IDQSILTGESVSVIK	57.344	8.3e-08	112168	APIS MELLIFERA	PREDICTED: similar to Calcium-transporting ATPase sarcoplasmic/endoplasmic reticulum type (Calcium pump) isoform 1
[43]		66521433	3	4.6	4.74	8.3e-08	1300.27	650.64	2	650.385	0.25	GVVIGTGLNTAIGK	53.299	7.2e-05	112168	APIS MELLIFERA	PREDICTED: similar to Calcium-transporting ATPase sarcoplasmic/endoplasmic reticulum type (Calcium pump) isoform 1
[43]		66521433	3	4.6	4.74	8.3e-08	2008.23	670.08	3	670.323	-0.24	NAESAIEALKEYEPEMGK	56.399	0.024	112168	APIS MELLIFERA	PREDICTED: similar to Calcium-transporting ATPase sarcoplasmic/endoplasmic reticulum type (Calcium pump) isoform 1
[44]		110750756	4	23.2	3.91	7.3e-08	1233.27	617.14	2	616.848	0.29	VIDNFIVVEGK	54.688	7.3e-08	21282.4	APIS MELLIFERA	PREDICTED: similar to Protein lethal(2)essential for life (Protein Efl21) isoform 1
[44]		110750756	4	23.2	3.91	7.3e-08	1291.27	646.14	2	645.846	0.29	ADQLFPSIPFR	63.304	0.00018	21282.4	APIS MELLIFERA	PREDICTED: similar to Protein lethal(2)essential for life (Protein Efl21) isoform 1
[44]		110750756	4	23.2	3.91	7.3e-08	1899.6	633.87	3	633.691	0.18	VILDVQQFKPEEINVK	59.863	0.00023	21282.4	APIS MELLIFERA	PREDICTED: similar to Protein lethal(2)essential for life (Protein Efl21) isoform 1
[44]		110750756	4	23.2	3.91	7.3e-08	1644.23	822.62	2	821.925	0.69	IDNFIVVEGKHEDK	49.056	0.021	21282.4	APIS MELLIFERA	PREDICTED: similar to Protein lethal(2)essential for life (Protein Efl21) isoform 1
[45]		66512737	4	8.5	3.01	5.8e-06	1432.21	716.61	2	716.348	0.26	QAELNEAQEMIR	51.406	5.8e-06	60119.6	APIS MELLIFERA	PREDICTED: similar to Moesin CG10701-PD, isoform D
[45]		66512737	4	8.5	3.01	5.8e-06	1430.13	715.57	2	715.368	0.2	QLQAAKEELEDR	43.865	1.7e-05	60119.6	APIS MELLIFERA	PREDICTED: similar to Moesin CG10701-PD, isoform D
[45]		66512737	4	8.5	3.01	5.8e-06	1192.55	596.78	2	596.322	0.46	RLEEVFEAAK	47.616	2.7e-05	60119.6	APIS MELLIFERA	PREDICTED: similar to Moesin CG10701-PD, isoform D
[45]		66512737	4	8.5	3.01	5.8e-06	1105.05	553.03	2	552.795	0.23	IGFPWSEIR	62.558	0.00052	60119.6	APIS MELLIFERA	PREDICTED: similar to Moesin CG10701-PD, isoform D
[46]		66537377	3	15.3	4	8.3e-08	1468.19	734.6	2	734.333	0.27	TLEEDDDEAFKR	44.325	8.3e-08	27105.1	APIS MELLIFERA	PREDICTED: similar to CG17489-PA.3, partial
[46]		66537377	3	15.3	4	8.3e-08	1367.17	684.09	2	683.36	0.73	GAVDGGLNIPHSTK	46.278	1.2e-06	27105.1	APIS MELLIFERA	PREDICTED: similar to CG17489-PA.3, partial
[46]		66537377	3	15.3	4	8.3e-08	1186.83	593.92	2	593.28	0.64	RFPGYDSESK	38.695	5.9e-05	27105.1	APIS MELLIFERA	PREDICTED: similar to CG17489-PA.3, partial
[47]		66565929	3	22.1	4.11	6.2e-08	1369.13	685.07	2	684.896	0.17	LVAIVDIIDQNR	62.893	6.2e-08	17505.7	APIS MELLIFERA	PREDICTED: similar to Ribosomal protein L14 CG6253-PA
[47]		66565929	3	22.1	4.11	6.2e-08	1239.55	620.28	2	620.338	-0.058	VLVDGPSSNVPR	45.852	8.1e-06	17505.7	APIS MELLIFERA	PREDICTED: similar to Ribosomal protein L14 CG6253-PA
[47]		66565929	3	22.1	4.11	6.2e-08	1151.31	576.16	2	575.796	0.36	RLELSDFDR	50.441	0.00029	17505.7	APIS MELLIFERA	PREDICTED: similar to Ribosomal protein L14 CG6253-PA
[48]		66512107	2	11	5.77	8.4e-09	1709.69	855.35	2	854.955	0.4	IITSDGIQNFNFALR	63.079	8.4e-09	26084.9	APIS MELLIFERA	PREDICTED: similar to Proteasome subunit beta type 1 (Proteasome 26 kDa subunit)
[48]		66512107	2	11	5.77	8.4e-09	1272.33	636.67	2	636.33	0.34	DIYTGDSIFIK	57.037	0.00012	26084.9	APIS MELLIFERA	PREDICTED: similar to Proteasome subunit beta type 1 (Proteasome 26 kDa subunit)
[49]		66500174	4	25.3	3.35	6e-06	2510.52	837.51	3	836.79	0.72	MALLGPEAKPGELNVLQVEAMGLK	68.189	6e-06	19789.2	APIS MELLIFERA	PREDICTED: similar to Nucleoplasmin CG7917-PA isoform 1
[49]		66500174	4	25.3	3.35	6e-06	1598.45	799.73	2	799.434	0.3	PGELNVLQVEAMGLK	63.401	0.00038	19789.2	APIS MELLIFERA	PREDICTED: similar to Nucleoplasmin CG7917-PA isoform 1
[49]		66500174	4	25.3	3.35	6e-06	3347.02	837.51	4	837.476	0.034	DQKLIIKMALLGPEAKPGELNVLQVEAMGLK	68.189	0.013	19789.2	APIS MELLIFERA	PREDICTED: similar to Nucleoplasmin CG7917-PA isoform 1
[49]		66500174	4	25.3	3.35	6e-06	1726.38	576.13	3	575.683	0.45	LKGPIKTPIALLEM(Oxidation)GK	52.032	0.043	19789.2	APIS MELLIFERA	PREDICTED: similar to Nucleoplasmin CG7917-PA isoform 1
[50]		297591983	3	45.9	3.52	2.4e-07	1766.63	883.82	2	883.941	-0.12	AANVDVESYWPGLFAK	66.554	2.4e-07	11623.2	APIS MELLIFERA	60S acidic ribosomal protein P1
[50]		297591983	3	45.9	3.52	2.4e-07	1187.89	594.45	2	594.335	0.11	ELITNIGSGVGK	50.133	2.2e-06	11623.2	APIS MELLIFERA	60S acidic ribosomal protein P1
[50]		297591983	3	45.9	3.52	2.4e-07	2108.37	703.46	3	703.027	0.43	APAAAPAAAAPASTESAPAKEEK	42.676	9.4e-06	11623.2	APIS MELLIFERA	60S acidic ribosomal protein P1
[51]		48141571	4	12.1	3.41	1.9e-06	1236.63	618.82	2	618.845	-0.025	SILSLSNVEFK	60.915	1.9e-06	34139.5	APIS MELLIFERA	PREDICTED: similar to CG5567-PA
[51]		48141571	4	12.1	3.41	1.9e-06	1274.51	637.76	2	637.837	-0.077	NELGDILEMIK	71.355	0.00091	34139.5	APIS MELLIFERA	PREDICTED: similar to CG5567-PA
[51]		48141571	4	12.1	3.41	1.9e-06	1724.67	575.56	3	575.659	-0.099	MKTKSILSLSNVEFK	60.825	0.013	34139.5	APIS MELLIFERA	PREDICTED: similar to CG5567-PA
[51]		48141571	4	12.1	3.41	1.9e-06	1134.47	567.74	2	567.314	0.43	EVGAVVIGFDK	43.332	0.042	34139.5	APIS MELLIFERA	PREDICTED: similar to CG5567-PA
[52]		3063347	4	6.4	2.91	1.4e-06	1413.13	707.07	2	706.804	0.27	MDSTEPPYSETR	42.568	1.4e-06	41409	LAETMONICE SP.	elongation factor-1alpha
[52]		3063347	4	6.4	2.91	1.4e-06	1404.51	702.76	2	702.867	-0.11	YYVTIIDAPGHR	51.26	1.3e-05	41409	LAETMONICE SP.	elongation factor-1alpha
[52]		3063347	4	6.4	2.91	1.4e-06	1281.59	641.3	2	641.283	0.017	DSTEPPYSETR	36.928	8.4e-05	41409	LAETMONICE SP.	elongation factor-1alpha
[52]		3063347	4	6.4	2.91	1.4e-06	1429.67	715.34	2	714.801	0.54	M(Oxidation)DSTEPPYSETR	39.843	0.0029	41409	LAETMONICE SP.	elongation factor-1alpha
[53]		66508906	3	13.2	3.18	2.9e-06	1168.71	584.86	2	584.82	0.04	VQHEGSLTIGK	38.598	2.9e-06	27140.7	APIS MELLIFERA	PREDICTED: similar to CG10527-PA
[53]		66508906	3	13.2	3.18	2.9e-06	1156.19	578.6	2	578.312	0.29	AYHEGALLPGK	44.152	4.4e-06	27140.7	APIS MELLIFERA	PREDICTED: similar to CG10527-PA
[53]		66508906	3	13.2	3.18	2.9e-06	1236.51	618.76	2	618.796	-0.036	DIDGNDLYVGR	48.77	7.2e-06	27140.7	APIS MELLIFERA	PREDICTED: similar to CG10527-PA
[54]		7688	2	18.9	4.73	1.2e-08	1845.55	923.28	2	922.949	0.33	EAFSLFDKDGDGTITTK	55.836	1.2e-08	16679.5	DROSOPHILA MELANOGASTER	unnamed protein product
[54]		7688	2	18.9	4.73	1.2e-08	1350.17	675.59	2	675.316	0.27	LTDEEVDEMIR	53.388	1.9e-07	16679.5	DROSOPHILA MELANOGASTER	unnamed protein product
[55]		94158711	2	21.5	4.74	3e-08	1745.37	873.19	2	872.442	0.75	EIGTAQQIIDDINEGK	61.563	3e-08	15031.6	APIS MELLIFERA	odorant binding protein 17
[55]		94158711	2	21.5	4.74	3e-08	1540.23	770.62	2	770.357	0.26	FNVVDENANFNEK	50.706	6.4e-07	15031.6	APIS MELLIFERA	odorant binding protein 17
[56]		48100966	2	4.9	5.14	2.8e-09	1626.31	813.66	2	812.949	0.71	TGAIVDVPVGEELLGR	62.44	2.8e-09	59512.1	APIS MELLIFERA	PREDICTED: similar to bellwether CG3612-PA isoform 1
[56]		48100966	2	4.9	5.14	2.8e-09	1234.47	617.74	2	617.32	0.42	SAEISSILEER	54.099	1.5e-05	59512.1	APIS MELLIFERA	PREDICTED: similar to bellwether CG3612-PA isoform 1
[57]		237681308	2	14.7	5.03	3e-09	1727.33	864.17	2	863.458	0.71	SEMPLGQVPILEIDGK	65.335	3e-09	23761.8	APIS MELLIFERA	glutathione S-transferase S1
[57]		237681308	2	14.7	5.03	3e-09	1616.35	808.68	2	808.464	0.22	LIYFNIPGLAEPIR	69.766	4.1e-06	23761.8	APIS MELLIFERA	glutathione S-transferase S1
[58]		66531434	3	8.1	3.29	2.2e-07	1950.23	975.62	2	974.995	0.62	EMIQTGISAIDVMNSIAR	68.113	2.2e-07	55144.5	APIS MELLIFERA	PREDICTED: similar to Vacuolar H+-ATPase 55kD B subunit CG17369-PB, isoform B
[58]		66531434	3	8.1	3.29	2.2e-07	1434.43	717.72	2	717.393	0.33	IPTNILAEFYPR	66.638	2.8e-06	55144.5	APIS MELLIFERA	PREDICTED: similar to Vacuolar H+-ATPase 55kD B subunit CG17369-PB, isoform B
[58]		66531434	3	8.1	3.29	2.2e-07	1121.23	561.12	2	560.769	0.35	TPVSEDM(Oxidation)LGR	42.143	9.2e-05	55144.5	APIS MELLIFERA	PREDICTED: similar to Vacuolar H+-ATPase 55kD B subunit CG17369-PB, isoform B
[59]		110767080	3	15.1	3.76	3.5e-07	1384.23	692.62	2	692.359	0.26	DIPDLTDKDVPR	50.052	3.5e-07	28895.9	APIS MELLIFERA	PREDICTED: similar to 40S ribosomal protein S6
[59]		110767080	3	15.1	3.76	3.5e-07	1118.17	559.59	2	559.28	0.31	LFEISDEHK	46.005	0.0011	28895.9	APIS MELLIFERA	PREDICTED: similar to 40S ribosomal protein S6
[59]		110767080	3	15.1	3.76	3.5e-07	1850.7	617.57	3	616.956	0.61	RM(Oxidation)GAEVEADALGNEWKG	39.317	0.049	28895.9	APIS MELLIFERA	PREDICTED: similar to 40S ribosomal protein S6
[60]		66521459	2	8.1	4.47	3.7e-08	1484.23	742.62	2	742.383	0.24	DLFSSGYHFGLIK	63.467	3.7e-08	30482.3	APIS MELLIFERA	PREDICTED: similar to porin CG6647-PA, isoform A
[60]		66521459	2	8.1	4.47	3.7e-08	1181.19	591.1	2	590.783	0.32	YNLDNDASIR	46.206	1.4e-05	30482.3	APIS MELLIFERA	PREDICTED: similar to porin CG6647-PA, isoform A
[61]		66515350	2	1	4.75	2.1e-08	1431.23	716.12	2	715.408	0.71	VSVVEAVANIMGIK	76.414	2.1e-08	261462	APIS MELLIFERA	PREDICTED: similar to CG3523-PA
[61]		66515350	2	1	4.75	2.1e-08	1109.29	555.15	2	554.795	0.36	VNSIANLFCK	36.329	0.0045	261462	APIS MELLIFERA	PREDICTED: similar to CG3523-PA
[62]		110755784	2	21.5	3.76	2.1e-07	1375.65	688.33	2	687.859	0.47	EGDLLTLLESER	65.757	2.1e-07	7385.7	APIS MELLIFERA	PREDICTED: similar to Ribosomal protein S28b CG2998-PA
[62]		110755784	2	21.5	3.76	2.1e-07	1574.51	787.76	2	787.899	-0.14	EGDLLTLLESEREA	66.508	1e-05	7385.7	APIS MELLIFERA	PREDICTED: similar to Ribosomal protein S28b CG2998-PA
[63]		295842193	2	21.3	3.6	1.9e-07	1321.41	661.21	2	661.354	-0.14	ADLIAYIEQASK	65.001	1.9e-07	11909.8	APIS MELLIFERA	cytochrome c
[63]		295842193	2	21.3	3.6	1.9e-07	1382.89	691.95	2	691.846	0.1	ETLFEYLENPK	65.149	2.3e-06	11909.8	APIS MELLIFERA	cytochrome c
[64]		48102814	3	12.8	2.63	1.6e-06	1589.25	795.13	2	794.944	0.19	ANPTALLLSAVM(Oxidation)MLK	78.146	1.6e-06	39135.6	APIS MELLIFERA	PREDICTED: similar to lethal (1) G0156 CG12233-PA, isoform A
[64]		48102814	3	12.8	2.63	1.6e-06	1408.23	704.62	2	704.378	0.24	TLYDNVDVVTIR	55.855	1.3e-05	39135.6	APIS MELLIFERA	PREDICTED: similar to lethal (1) G0156 CG12233-PA, isoform A
[64]		48102814	3	12.8	2.63	1.6e-06	2053.65	685.22	3	684.693	0.53	VPIEWESVDVTPVKGPDGK	57.166	0.00023	39135.6	APIS MELLIFERA	PREDICTED: similar to lethal (1) G0156 CG12233-PA, isoform A
[65]		110759540	2	14.6	4	9.3e-07	1393.91	697.46	2	697.364	0.096	DILDSSVFQELK	65.044	9.3e-07	29666.9	APIS MELLIFERA	PREDICTED: similar to Probable elongation factor 1-delta (EF-1-delta)
[65]		110759540	2	14.6	4	9.3e-07	2759.7	690.68	4	690.359	0.32	ERMAKGNQQTTSPILSAGGSLANEVAK	53.203	0.03	29666.9	APIS MELLIFERA	PREDICTED: similar to Probable elongation factor 1-delta (EF-1-delta)
[66]		110770725	2	36.2	3.28	9.1e-07	1766.43	883.72	2	883.017	0.7	GLPPVQAYLNIPEIIK	70.573	9.1e-07	8808.2	APIS MELLIFERA	PREDICTED: similar to CG1516-PE, isoform E, partial
[66]		110770725	2	36.2	3.28	9.1e-07	1363.65	682.33	2	681.854	0.48	SDFAEAVINAGIR	59.968	1e-05	8808.2	APIS MELLIFERA	PREDICTED: similar to CG1516-PE, isoform E, partial
[67]		48094573	1	10.5	5.72	5.2e-09	1928.65	964.83	2	964.52	0.31	EQVANALLEGSSDLIGALK	71.486	5.2e-09	19433.8	APIS MELLIFERA	PREDICTED: hypothetical protein
[68]		66518848	2	7	3.7	8.3e-07	1440.75	720.88	2	720.445	0.43	VTIATGVITNILPK	64.584	8.3e-07	52421.4	APIS MELLIFERA	PREDICTED: similar to Elongation factor Tu mitochondrial CG6050-PA isoform 2
[68]		66518848	2	7	3.7	8.3e-07	2286.24	762.75	3	762.036	0.71	KPINNLVQIQM(Oxidation)FCKTW(Oxidation)DCA	78.002	0.034	52421.4	APIS MELLIFERA	PREDICTED: similar to Elongation factor Tu mitochondrial CG6050-PA isoform 2
[69]		66551115	2	5.7	3.47	4.9e-08	1369.71	685.36	2	684.847	0.51	GHDVIAQAQSGTGK	33.009	4.9e-08	48156.4	APIS MELLIFERA	PREDICTED: similar to Eukaryotic initiation factor 4A (ATP-dependent RNA helicase eIF4A) (eIF-4A) isoform 2
[69]		66551115	2	5.7	3.47	4.9e-08	1114.85	557.93	2	557.845	0.085	VLITTDLLAR	58.079	0.0018	48156.4	APIS MELLIFERA	PREDICTED: similar to Eukaryotic initiation factor 4A (ATP-dependent RNA helicase eIF4A) (eIF-4A) isoform 2
[70]		156382661	1	4.4	5.06	2.8e-08	1787.47	894.24	2	893.967	0.27	VFLLGEEVALYDGAYK	68.159	2.8e-08	39352.8	NEMATOSTELLA VECTENSIS	predicted protein
[71]		66501020	1	3.6	4.94	1.9e-08	1441.27	721.14	2	720.925	0.22	ALQSVGQIVGEVLK	67.743	1.9e-08	44487.7	APIS MELLIFERA	PREDICTED: similar to Rpt4 CG3455-PA
[72]		110769113	1	3.1	4.85	5.2e-08	1533.17	767.09	2	766.849	0.24	YAADDAEFQDFLK	60.003	5.2e-08	48252.3	APIS MELLIFERA	PREDICTED: similar to CG4409-PA, partial
[73]		110749015	2	12.2	3.26	4.3e-07	1658.51	829.76	2	829.467	0.29	NILDTNLLAPAIFSR	70.063	4.3e-07	26510.8	APIS MELLIFERA	PREDICTED: similar to CG10962-PB, isoform B
[73]		110749015	2	12.2	3.26	4.3e-07	1261.59	631.3	2	630.843	0.46	VTGASSGIGAEIAK	45.955	0.012	26510.8	APIS MELLIFERA	PREDICTED: similar to CG10962-PB, isoform B
[74]		66513481	3	5.1	2.75	5.4e-07	1507.87	754.44	2	754.44	-0.00015	LPGVQPLEVLESVK	66.723	5.4e-07	117107	APIS MELLIFERA	PREDICTED: similar to Ubiquitin activating enzyme 1 CG1782-PA isoform 1
[74]		66513481	3	5.1	2.75	5.4e-07	1258.33	629.67	2	628.886	0.78	VVAGLVCLELIK	52.394	0.014	117107	APIS MELLIFERA	PREDICTED: similar to Ubiquitin activating enzyme 1 CG1782-PA isoform 1
[74]		66513481	3	5.1	2.75	5.4e-07	3146.82	787.46	4	786.848	0.61	RHGMEDGDYVTFSEVQGM(Oxidation)TELNGCDPIK	41.403	0.029	117107	APIS MELLIFERA	PREDICTED: similar to Ubiquitin activating enzyme 1 CG1782-PA isoform 1
[75]		66517317	1	9.9	4.75	1.1e-08	1679.47	840.24	2	839.446	0.79	QVDVPSFSGSFGILPK	65.131	1.1e-08	17618.1	APIS MELLIFERA	PREDICTED: similar to lethal (1) G0230 CG2968-PA
[76]		66508940	1	4.5	4.67	1.9e-07	1260.19	630.6	2	630.327	0.27	VSLDGADVNLEK	51.109	1.9e-07	29906.9	APIS MELLIFERA	PREDICTED: similar to CG6459-PA
[77]		66559145	1	1.4	4.54	7.1e-08	1640.85	820.93	2	820.476	0.45	LIELSNPILMDLIR	75.47	7.1e-08	112866	APIS MELLIFERA	PREDICTED: similar to CG8798-PA, isoform A
[78]		48098918	1	7.4	4.45	2.2e-06	1489.87	745.44	2	745.404	0.036	AGGELISFDQLALR	64.324	2.2e-06	21680	APIS MELLIFERA	PREDICTED: similar to Ribosomal protein L18 CG8615-PA
[79]		110756783	1	3.8	4.44	9.9e-09	1857.89	929.45	2	929.489	-0.039	DQPVVNAVIDGAEIVYR	66.35	9.9e-09	49084.5	APIS MELLIFERA	PREDICTED: similar to CG5214-PA
[80]		66559310	2	9.5	3.04	1.6e-06	1204.15	602.58	2	602.335	0.25	LVQLLDDYPK	55.392	1.6e-06	34415.1	APIS MELLIFERA	PREDICTED: similar to 60S acidic ribosomal protein P0 (DNA-(apurinic or apyrimidinic site) lyase) (Apurinic-apyrimidinic endonuclease) isoform 1
[80]		66559310	2	9.5	3.04	1.6e-06	2246.14	562.29	4	562.548	-0.26	IVGADNVGSKQM(Oxidation)QQIRMSLR	106.811	0.036	34415.1	APIS MELLIFERA	PREDICTED: similar to 60S acidic ribosomal protein P0 (DNA-(apurinic or apyrimidinic site) lyase) (Apurinic-apyrimidinic endonuclease) isoform 1
[81]		66500205	1	2.7	4.33	1.9e-07	1430.23	715.62	2	715.399	0.22	AVEILSDIIQNSK	62.01	1.9e-07	53349.2	APIS MELLIFERA	PREDICTED: similar to CG3731-PB, isoform B
[82]		66550890	2	6.7	2.77	2.4e-06	1282.11	641.56	2	641.327	0.23	YYEIIVNDPR	51.319	2.4e-06	35361.1	APIS MELLIFERA	PREDICTED: similar to Phosphoglyceromutase CG1721-PA, isoform A
[82]		66550890	2	6.7	2.77	2.4e-06	1258.51	629.76	2	629.836	-0.076	EIGQENITVQK	44.861	0.0039	35361.1	APIS MELLIFERA	PREDICTED: similar to Phosphoglyceromutase CG1721-PA, isoform A
[83]		110768336	1	7	4.17	8.8e-08	1574.51	787.76	2	787.433	0.33	VLEQLTGQQPVFSK	54.116	8.8e-08	22844.7	APIS MELLIFERA	PREDICTED: similar to Ribosomal protein L11 CG7726-PA
[84]		48095625	1	11.4	4.01	3.1e-08	1662.37	831.69	2	831.425	0.27	STGFALIYDTLDFAK	73.058	3.1e-08	15343.3	APIS MELLIFERA	PREDICTED: similar to Ribosomal protein S24 CG3751-PA isoform 1
[85]		63334183	1	11.2	4.01	3.1e-08	1662.37	831.69	2	831.425	0.27	TSGFALIYDTLDFAK	73.058	3.1e-08	15346.1	DERMACENTOR VARIABILIS	ribosomal protein S24
[86]		110748686	1	10.8	3.87	1e-07	1770.43	885.72	2	884.929	0.79	DQSANFVNNIQDYIK	63.037	1e-07	15777.1	APIS MELLIFERA	PREDICTED: hypothetical protein
[87]		66530404	1	5.4	3.74	5.6e-08	1752.59	876.8	2	876.403	0.4	NQYDSDVTVWSPQGR	51.916	5.6e-08	30927.3	APIS MELLIFERA	PREDICTED: similar to Proteasome subunit alpha type 1 (Proteasome component C2) (Macropain subunit C2) (Multicatalytic endopeptidase complex subunit C2) (Proteasome nu chain)
[88]		110755553	3	11.7	2.19	2.7e-06	1576.25	788.63	2	788.408	0.22	MGPPDAILGLTEAYK	63.896	2.7e-06	48049.5	APIS MELLIFERA	PREDICTED: similar to aspartate aminotransferase 2 precursor isoform 1
[88]		110755553	3	11.7	2.19	2.7e-06	1131.41	566.21	2	565.806	0.4	LALGDNSDVVK	47.258	0.0082	48049.5	APIS MELLIFERA	PREDICTED: similar to aspartate aminotransferase 2 precursor isoform 1
[88]		110755553	3	11.7	2.19	2.7e-06	2759.7	690.68	4	691.07	-0.39	DW(Oxidation)SHITNQIGM(Oxidation)FCFTGLKSSEAEK	94.788	0.028	48049.5	APIS MELLIFERA	PREDICTED: similar to aspartate aminotransferase 2 precursor isoform 1
[89]		110769199	1	13.9	3.61	4.8e-07	1598.75	799.88	2	799.433	0.45	VPPPINQFTQTLDK	58.343	4.8e-07	11778.3	APIS MELLIFERA	PREDICTED: similar to 60S ribosomal protein L7a, partial
[90]		156554296	1	8.6	3.52	1.4e-07	1430.01	715.51	2	715.362	0.15	IEDVTPIPSDSTR	47.095	1.4e-07	16221.8	NASONIA VITRIPENNIS	PREDICTED: similar to S14e ribosomal protein
[91]		118596554	1	5.1	3.46	3.8e-08	1519.69	760.35	2	759.873	0.48	SGKEEGAIVETGGER	43.883	3.8e-08	32123.2	PAREPICHLOE CINEREA	acetaldehyde dehydrogenase
[92]		60115688	1	4.9	3.41	4.4e-07	1284.21	642.61	2	642.341	0.27	IPEQGVVNWNK	49.42	4.4e-07	24788.7	APIS MELLIFERA	venom protein 2 precursor
[93]		110758964	1	13.8	3.35	9.3e-08	1325.29	663.15	2	662.867	0.28	GLGVYGLVANSFK	63.722	9.3e-08	10160.9	APIS MELLIFERA	PREDICTED: similar to Regucalcin (RC) (Senescence marker protein 30) (SMP-30)
[94]		66511547	1	2.2	3.23	4.2e-07	1164.29	582.65	2	582.306	0.34	IPIGGTDFSTR	49.361	4.2e-07	57952.8	APIS MELLIFERA	PREDICTED: similar to glucocerebrosidase precursor
[95]		58585114	1	7.5	3.17	6.5e-07	1264.19	632.6	2	631.815	0.78	ELEVLMMQNR	55.13	6.5e-07	15938.9	APIS MELLIFERA	60S ribosomal protein L32
[96]		66517407	1	5	3.08	2.4e-07	1397.25	699.13	2	698.875	0.25	VNDTIHLDIATGK	50.956	2.4e-07	29428.7	APIS MELLIFERA	PREDICTED: similar to Ribosomal protein S4 CG11276-PA, isoform A isoform 1
[97]		110756910	1	3.3	2.93	2.6e-06	1571.31	786.16	2	785.904	0.26	YETLVDELSNIFK	76.844	2.6e-06	45683.4	APIS MELLIFERA	PREDICTED: similar to CG32626-PC, isoform C
[98]		156547538	1	7.2	2.57	5.5e-06	2657.67	886.56	3	885.786	0.77	VIHDNFEIVEGLMTTVHATTATQK	77.13	5.5e-06	35608	NASONIA VITRIPENNIS	PREDICTED: similar to glyceraldehyde-3-phosphate dehydrogenase
[99]		66511001	1	3.2	2.56	2.1e-06	1384.87	692.94	2	692.369	0.57	TFIEFFGGQIPK	65.113	2.1e-06	42478	APIS MELLIFERA	PREDICTED: similar to CG2947-PA, isoform A isoform 1
[100]		48142173	1	4.4	2.35	5.7e-06	1129.29	565.15	2	564.817	0.33	GNDVVVLGVEK	49.003	5.7e-06	28120.5	APIS MELLIFERA	PREDICTED: similar to Proteasome subunit alpha type 7-1 (Proteasome 28 kDa subunit 1) (PROS-Dm28.1) isoform 1
[101]		[-58585104]	1	1.8	0.84	0.0098	3422.66	856.42	4	855.951	0.47	YLPIVKTGANLNMLTESSSIRDTTIYVGHNL	76.942	0.0098	201050	APIS MELLIFERA	vitellogenin
[102]		[-66513481]	2	3.9	0.53	0.0056	1494.05	747.53	2	746.857	0.67	GSIKDSPIM(Oxidation)SNDGR	27.678	0.0056	117107	APIS MELLIFERA	PREDICTED: similar to Ubiquitin activating enzyme 1 CG1782-PA isoform 1
[102]		[-66513481]	2	3.9	0.53	0.0056	3028.3	757.83	4	758.39	-0.56	QPKPIAYSGKYNAVVNAPELTYAYMNK	88.132	0.048	117107	APIS MELLIFERA	PREDICTED: similar to Ubiquitin activating enzyme 1 CG1782-PA isoform 1
[103]		[-110758758]	2	0.8	0.11	0.0064	1546.03	773.52	2	773.432	0.089	TLTVSVCSIAVDPIK	75.753	0.0064	374763	APIS MELLIFERA	PREDICTED: similar to Retinoid- and fatty-acid binding protein CG11064-PA isoform 1
[103]		[-110758758]	2	0.8	0.11	0.0064	1498.35	749.68	2	749.459	0.22	TLLVFLYIKM(Oxidation)LK	74.766	0.0093	374763	APIS MELLIFERA	PREDICTED: similar to Retinoid- and fatty-acid binding protein CG11064-PA isoform 1
